# Supplementary material
Source: publisher figshare collection journal article supplement (https://tandf.figshare.com/ndownloader/files/14464352)
Supplement: Supplementary file 1 [file 14464352]

## Sheet: The Measured Ignition Delay Tim
Table 1. The Measured Ignition Delay Times of BCH/air.
P (atm)	T (K)	τign (μs)	P (atm)	T (K)	τign (μs)	P (atm)	T (K)	τign (μs)
Φ=0.5			Φ=1.0			Φ=2.0
15.93	1273	61	15.43	1291	58	16.43	1241	90
15.73	1264	75	15.04	1226	109	16.09	1166	170
15.18	1239	87	15.78	1217	98	15.68	1119	258
15.8	1220	147	15.69	1208	113	16.27	1072	453
15.48	1208	183	15.42	1172	219	15.45	1063	479
15.43	1206	179	15.19	1138	285	16	1056	519
15.6	1183	216	15.51	1112	389	15.47	1038	565
15.18	1156	289	15.21	1050	665	5.49	1326	131
15.14	1132	415	14.01	1029	922	5.44	1314	140
15.39	1130	419	15.01	983	1431	5.35	1258	224
14.88	1076	792	15.1	938	1854	5.41	1253	250
14.85	978	2046	15.07	937	1931	5.36	1239	273
14.51	958	2715	15.02	895	2503	5.18	1186	417
14.82	938	3303	14.59	836	2287	5.37	1171	507
14.48	885	6745	15.87	799	2255	5.33	1121	979
14.66	869	6667	15.45	785	2055	4.62	1087	1467
14.48	812	5176	15.95	772	2075	2.39	1458	91
15.86	775	4271	16.09	728	2961	2.22	1373	160
15.42	751	4771	5.4	1275	171	2.19	1344	248
15.49	707	6577	5.18	1253	263	2.22	1324	268
4.62	1350	79	4.92	1246	270	2.2	1299	333
5.29	1345	63	4.89	1207	415	2.24	1271	421
5.25	1280	149	4.72	1168	553	2.15	1266	492
5.28	1280	129	5.39	1149	727	2.17	1264	441
5.41	1243	247	4.42	1114	1179	2.06	1222	913
5.36	1220	339	4.81	1105	1527	2.11	1194	1146
4.45	1200	414	4.97	1090	1452
5.02	1195	433	2.16	1392	95
4.9	1162	857	2.14	1382	108
5.39	1142	843	2.07	1348	208
2.1	1337	95	2.07	1315	295
2.07	1314	150	2.05	1306	319
2.06	1288	202	2.12	1298	333
2.03	1286	203	2.05	1265	436
2.12	1258	344	2.07	1259	475
2.05	1233	467	2.08	1251	461
2.06	1225	456	2.08	1208	909
1.97	1196	658	2	1186	1122
2.1	1167	1081	2.06	1182	1139

## Sheet: Φ= 0.5  P= 2.0 atm 
Φ= 0.5 P= 1.97atm T= 1196K			Φ= 0.5 P= 2.03atm T= 1286 K			Φ= 0.5 P= 2.06atm T= 1225 K			Φ= 0.5 P= 2.06atm T= 1288 K			Φ= 0.5 P= 2.07atm T= 1314 K			Φ= 0.5 P= 2.10atm T= 1167 K			Φ= 0.5 P= 2.10atm T= 1337 K			Φ= 0.5 P= 2.12atm T= 1258 K
Time(µs)	Pressure (arbitrary unit)	CH* trance(arbitrary unit)	Time(µs)	Pressure (arbitrary unit)	CH* trance(arbitrary unit)	Time(µs)	Pressure (arbitrary unit)	CH* trance(arbitrary unit)	Time(µs)	Pressure (arbitrary unit)	CH* trance(arbitrary unit)	Time(µs)	Pressure (arbitrary unit)	CH* trance(arbitrary unit)	Time(µs)	Pressure (arbitrary unit)	CH* trance(arbitrary unit)	Time(µs)	Pressure (arbitrary unit)	CH* trance(arbitrary unit)	Time(µs)	Pressure (arbitrary unit)	CH* trance(arbitrary unit)
-0.000232	-0.008	0.006	-0.0004	-0.006	5.96047e-09	-0.000232	-0.008	0.002	-0.000116	-0.006	0.004	-0.000232	-0.008	0.004	-0.000464	-1.49012e-09	0.000999995	-0.000116	-0.008	1.19209e-08	-0.000116	-0.002	0.004
-0.0002316	-0.006	0.006	-0.0003992	-0.006	5.96047e-09	-0.0002316	-0.008	-0.006	-0.0001158	-0.004	1.19209e-08	-0.0002316	-0.006	1.19209e-08	-0.0004632	-1.49012e-09	-0.001	-0.0001158	-0.004	1.19209e-08	-0.0001158	-0.006	0.004
-0.0002312	-0.006	0.004	-0.0003984	-0.006	5.96047e-09	-0.0002312	-0.008	-0.002	-0.0001156	-0.006	0.004	-0.0002312	-0.006	1.19209e-08	-0.0004624	-0.004	0.000999995	-0.0001156	-0.004	1.19209e-08	-0.0001156	-0.004	0.006
-0.0002308	-0.008	0.002	-0.0003976	-0.008	5.96047e-09	-0.0002308	-0.008	-0.002	-0.0001154	-0.006	1.19209e-08	-0.0002308	-0.004	-0.004	-0.0004616	-0.002	-0.001	-0.0001154	-0.006	1.19209e-08	-0.0001154	-0.006	0.006
-0.0002304	-0.008	0.004	-0.0003968	-0.008	-0.002	-0.0002304	-0.008	0.006	-0.0001152	-0.006	1.19209e-08	-0.0002304	-0.006	1.19209e-08	-0.0004608	-1.49012e-09	-0.001	-0.0001152	-0.008	1.19209e-08	-0.0001152	-0.008	0.004
-0.00023	-0.006	0.002	-0.000396	-0.006	5.96047e-09	-0.00023	-0.008	0.002	-0.000115	-0.008	-0.004	-0.00023	-0.006	-0.008	-0.00046	-0.002	-0.001	-0.000115	-0.006	0.004	-0.000115	-0.006	0.006
-0.0002296	-0.004	0.004	-0.0003952	-0.008	5.96047e-09	-0.0002296	-2.98023e-09	0.006	-0.0001148	-0.006	1.19209e-08	-0.0002296	-0.006	0.004	-0.0004592	-1.49012e-09	-0.001	-0.0001148	-0.004	0.004	-0.0001148	-0.006	5.96047e-09
-0.0002292	-0.008	0.004	-0.0003944	-0.008	0.002	-0.0002292	-0.008	0.002	-0.0001146	-0.008	-0.004	-0.0002292	-0.004	0.004	-0.0004584	-0.004	-0.001	-0.0001146	-0.006	1.19209e-08	-0.0001146	-0.006	0.004
-0.0002288	-0.008	0.004	-0.0003936	-0.006	5.96047e-09	-0.0002288	-0.004	0.002	-0.0001144	-0.004	-0.004	-0.0002288	-0.008	-0.004	-0.0004576	0.002	-0.001	-0.0001144	-0.006	1.19209e-08	-0.0001144	-0.008	0.008
-0.0002284	-0.008	0.004	-0.0003928	-0.008	5.96047e-09	-0.0002284	-0.008	0.002	-0.0001142	-0.004	1.19209e-08	-0.0002284	-0.008	-0.004	-0.0004568	-0.002	-0.001	-0.0001142	-0.004	0.004	-0.0001142	-0.004	0.004
-0.000228	-0.008	0.004	-0.000392	-0.006	5.96047e-09	-0.000228	-0.008	0.002	-0.000114	-0.004	0.004	-0.000228	-0.006	-0.004	-0.000456	-1.49012e-09	0.000999995	-0.000114	-0.004	0.004	-0.000114	-0.006	0.004
-0.0002276	-0.004	0.004	-0.0003912	-0.01	0.006	-0.0002276	-0.004	0.002	-0.0001138	-0.002	-0.004	-0.0002276	-0.004	1.19209e-08	-0.0004552	-1.49012e-09	-0.001	-0.0001138	-0.006	0.004	-0.0001138	-0.004	0.004
-0.0002272	-0.004	0.004	-0.0003904	-0.006	0.002	-0.0002272	-0.008	-0.002	-0.0001136	-0.002	1.19209e-08	-0.0002272	-0.006	1.19209e-08	-0.0004544	-0.006	-0.005	-0.0001136	-0.006	0.008	-0.0001136	-0.004	0.006
-0.0002268	-0.008	0.004	-0.0003896	-0.006	0.002	-0.0002268	-0.012	-0.002	-0.0001134	-0.008	1.19209e-08	-0.0002268	-0.004	-0.004	-0.0004536	0.002	-0.001	-0.0001134	-0.008	1.19209e-08	-0.0001134	-0.006	0.002
-0.0002264	-0.008	0.002	-0.0003888	-0.008	0.002	-0.0002264	-0.004	0.002	-0.0001132	-0.008	1.19209e-08	-0.0002264	-0.006	1.19209e-08	-0.0004528	-0.004	-0.003	-0.0001132	-0.006	1.19209e-08	-0.0001132	-0.01	0.006
-0.000226	-0.004	0.004	-0.000388	-0.004	5.96047e-09	-0.000226	-0.012	-0.002	-0.000113	-0.004	-0.004	-0.000226	-0.008	-0.004	-0.000452	-0.002	-0.001	-0.000113	-0.006	1.19209e-08	-0.000113	-0.008	0.002
-0.0002256	-0.008	0.004	-0.0003872	-0.008	0.002	-0.0002256	-0.008	0.006	-0.0001128	-0.006	1.19209e-08	-0.0002256	-0.008	1.19209e-08	-0.0004512	-1.49012e-09	0.000999995	-0.0001128	-0.004	-0.004	-0.0001128	-0.01	0.004
-0.0002252	-0.008	0.004	-0.0003864	-0.006	0.002	-0.0002252	-2.98023e-09	0.002	-0.0001126	-0.006	0.004	-0.0002252	-0.006	0.004	-0.0004504	-1.49012e-09	-0.001	-0.0001126	-0.004	1.19209e-08	-0.0001126	-0.006	0.004
-0.0002248	-0.004	0.004	-0.0003856	-0.008	0.002	-0.0002248	-0.004	-0.002	-0.0001124	-0.004	-0.008	-0.0002248	-0.006	1.19209e-08	-0.0004496	-0.002	-0.001	-0.0001124	-0.006	0.004	-0.0001124	-0.006	0.004
-0.0002244	-0.006	0.004	-0.0003848	-0.006	0.002	-0.0002244	-0.008	0.002	-0.0001122	-0.008	1.19209e-08	-0.0002244	-0.006	1.19209e-08	-0.0004488	-1.49012e-09	-0.001	-0.0001122	-0.006	1.19209e-08	-0.0001122	-0.006	0.004
-0.000224	-0.006	0.002	-0.000384	-0.006	0.002	-0.000224	-0.012	-0.002	-0.000112	-0.008	0.004	-0.000224	-0.006	1.19209e-08	-0.000448	-0.002	0.000999995	-0.000112	-0.006	1.19209e-08	-0.000112	-0.006	0.002
-0.0002236	-0.008	0.004	-0.0003832	-0.006	0.002	-0.0002236	-0.008	-0.002	-0.0001118	-0.008	1.19209e-08	-0.0002236	-0.01	1.19209e-08	-0.0004472	-0.002	-0.003	-0.0001118	-0.004	0.004	-0.0001118	-0.006	0.002
-0.0002232	-0.008	0.002	-0.0003824	-0.008	0.002	-0.0002232	-0.012	-0.002	-0.0001116	-0.006	-0.008	-0.0002232	-0.008	-0.004	-0.0004464	0.002	-0.003	-0.0001116	-0.004	1.19209e-08	-0.0001116	-0.008	0.004
-0.0002228	-0.006	0.006	-0.0003816	-0.006	5.96047e-09	-0.0002228	-0.016	0.002	-0.0001114	-0.006	1.19209e-08	-0.0002228	-0.006	1.19209e-08	-0.0004456	-0.004	-0.001	-0.0001114	-0.008	0.004	-0.0001114	-0.004	0.004
-0.0002224	-0.004	0.004	-0.0003808	-0.006	0.002	-0.0002224	-0.004	-0.006	-0.0001112	-0.004	-0.004	-0.0002224	-0.008	1.19209e-08	-0.0004448	-1.49012e-09	-0.001	-0.0001112	-0.006	1.19209e-08	-0.0001112	-0.006	0.002
-0.000222	-0.004	0.004	-0.00038	-0.008	0.004	-0.000222	-0.008	-0.002	-0.000111	-0.006	1.19209e-08	-0.000222	-0.006	-0.004	-0.000444	-0.002	0.000999995	-0.000111	-0.008	1.19209e-08	-0.000111	-0.006	0.004
-0.0002216	-0.006	0.006	-0.0003792	-0.006	0.004	-0.0002216	-2.98023e-09	0.002	-0.0001108	-0.006	1.19209e-08	-0.0002216	-0.008	1.19209e-08	-0.0004432	-0.002	-0.001	-0.0001108	-0.006	1.19209e-08	-0.0001108	-0.006	0.004
-0.0002212	-0.008	0.006	-0.0003784	-0.006	0.002	-0.0002212	-0.008	-0.002	-0.0001106	-0.006	1.19209e-08	-0.0002212	-0.01	1.19209e-08	-0.0004424	-0.002	-0.001	-0.0001106	-0.006	-0.004	-0.0001106	-0.008	0.004
-0.0002208	-0.008	0.006	-0.0003776	-0.006	0.002	-0.0002208	-0.008	0.002	-0.0001104	-0.008	1.19209e-08	-0.0002208	-0.008	-0.008	-0.0004416	0.002	-0.001	-0.0001104	-0.004	1.19209e-08	-0.0001104	-0.008	0.004
-0.0002204	-0.008	0.004	-0.0003768	-0.006	0.002	-0.0002204	-0.008	0.002	-0.0001102	-0.006	-0.004	-0.0002204	-0.006	0.004	-0.0004408	-0.004	-0.001	-0.0001102	-0.004	1.19209e-08	-0.0001102	-0.008	0.004
-0.00022	-0.006	0.002	-0.000376	-0.006	0.004	-0.00022	-0.008	-0.002	-0.00011	-0.006	1.19209e-08	-0.00022	-0.008	1.19209e-08	-0.00044	-0.002	-0.001	-0.00011	-0.004	-0.008	-0.00011	-0.008	0.004
-0.0002196	-0.006	5.96047e-09	-0.0003752	-0.006	0.004	-0.0002196	-0.004	0.002	-0.0001098	-0.006	-0.004	-0.0002196	-0.006	1.19209e-08	-0.0004392	-1.49012e-09	-0.001	-0.0001098	-0.006	1.19209e-08	-0.0001098	-0.006	0.004
-0.0002192	-0.008	0.002	-0.0003744	-0.01	0.002	-0.0002192	-2.98023e-09	-0.002	-0.0001096	-0.008	-0.004	-0.0002192	-0.008	1.19209e-08	-0.0004384	-1.49012e-09	-0.001	-0.0001096	-0.006	0.004	-0.0001096	-0.008	0.002
-0.0002188	-0.008	0.002	-0.0003736	-0.006	0.002	-0.0002188	-0.004	0.002	-0.0001094	-0.006	1.19209e-08	-0.0002188	-0.008	0.004	-0.0004376	-0.002	0.000999995	-0.0001094	-0.008	0.004	-0.0001094	-0.006	0.004
-0.0002184	-0.006	0.004	-0.0003728	-0.008	5.96047e-09	-0.0002184	-0.008	-0.002	-0.0001092	-0.008	1.19209e-08	-0.0002184	-0.008	1.19209e-08	-0.0004368	0.004	-0.001	-0.0001092	-0.01	-0.004	-0.0001092	-0.008	0.002
-0.000218	-0.004	0.004	-0.000372	-0.008	0.002	-0.000218	-0.008	0.002	-0.000109	-0.006	-0.004	-0.000218	-0.008	1.19209e-08	-0.000436	-0.002	-0.003	-0.000109	-0.01	1.19209e-08	-0.000109	-0.006	0.004
-0.0002176	-0.008	0.004	-0.0003712	-0.006	0.002	-0.0002176	-0.004	0.002	-0.0001088	-0.008	1.19209e-08	-0.0002176	-0.006	1.19209e-08	-0.0004352	-1.49012e-09	-0.001	-0.0001088	-0.004	-0.004	-0.0001088	-0.008	0.004
-0.0002172	-0.004	0.004	-0.0003704	-0.006	0.004	-0.0002172	-0.004	-0.002	-0.0001086	-0.006	1.19209e-08	-0.0002172	-0.008	0.004	-0.0004344	-0.002	0.000999995	-0.0001086	-0.004	1.19209e-08	-0.0001086	-0.006	0.006
-0.0002168	-0.006	0.006	-0.0003696	-0.006	0.004	-0.0002168	-0.008	0.002	-0.0001084	-0.006	-0.004	-0.0002168	-0.008	1.19209e-08	-0.0004336	-0.002	-0.001	-0.0001084	-0.006	1.19209e-08	-0.0001084	-0.006	0.004
-0.0002164	-0.008	0.004	-0.0003688	-0.006	0.004	-0.0002164	-2.98023e-09	-0.002	-0.0001082	-0.006	1.19209e-08	-0.0002164	-0.004	1.19209e-08	-0.0004328	-0.002	-0.001	-0.0001082	-0.006	-0.004	-0.0001082	-0.004	0.006
-0.000216	-0.008	0.004	-0.000368	-0.006	0.002	-0.000216	-0.004	-0.002	-0.000108	-0.008	0.008	-0.000216	-0.006	1.19209e-08	-0.000432	-1.49012e-09	-0.003	-0.000108	-0.008	1.19209e-08	-0.000108	-0.006	0.006
-0.0002156	-0.008	0.006	-0.0003672	-0.006	0.004	-0.0002156	-0.012	-0.006	-0.0001078	-0.006	1.19209e-08	-0.0002156	-0.006	1.19209e-08	-0.0004312	-1.49012e-09	0.000999995	-0.0001078	-0.008	1.19209e-08	-0.0001078	-0.008	0.006
-0.0002152	-0.006	0.004	-0.0003664	-0.008	5.96047e-09	-0.0002152	-0.008	-0.002	-0.0001076	-0.01	1.19209e-08	-0.0002152	-0.01	1.19209e-08	-0.0004304	-1.49012e-09	0.000999995	-0.0001076	-0.004	1.19209e-08	-0.0001076	-0.008	0.002
-0.0002148	-0.008	0.006	-0.0003656	-0.004	0.002	-0.0002148	-0.004	-0.002	-0.0001074	-0.008	0.004	-0.0002148	-0.008	1.19209e-08	-0.0004296	-1.49012e-09	0.000999995	-0.0001074	-0.006	0.004	-0.0001074	-0.006	0.002
-0.0002144	-0.006	0.004	-0.0003648	-0.006	0.002	-0.0002144	-0.004	0.002	-0.0001072	-0.01	1.19209e-08	-0.0002144	-0.006	0.004	-0.0004288	-0.002	-0.001	-0.0001072	-0.004	0.004	-0.0001072	-0.004	0.002
-0.000214	-0.006	0.004	-0.000364	-0.006	0.002	-0.000214	-2.98023e-09	-0.002	-0.000107	-0.008	-0.004	-0.000214	-0.006	1.19209e-08	-0.000428	0.002	-0.001	-0.000107	-0.006	0.008	-0.000107	-0.004	0.002
-0.0002136	-0.01	0.002	-0.0003632	-0.006	0.004	-0.0002136	-0.008	0.002	-0.0001068	-0.008	1.19209e-08	-0.0002136	-0.006	1.19209e-08	-0.0004272	-0.002	0.000999995	-0.0001068	-0.006	-0.004	-0.0001068	-0.004	0.004
-0.0002132	-0.01	0.004	-0.0003624	-0.008	0.004	-0.0002132	-0.004	-0.002	-0.0001066	-0.006	-0.004	-0.0002132	-0.01	0.004	-0.0004264	0.002	-0.001	-0.0001066	-0.004	1.19209e-08	-0.0001066	-0.004	0.002
-0.0002128	-0.002	0.002	-0.0003616	-0.004	0.002	-0.0002128	-0.008	0.002	-0.0001064	-0.004	-0.004	-0.0002128	-0.008	0.004	-0.0004256	-0.002	-0.003	-0.0001064	-0.006	-0.004	-0.0001064	-0.004	0.006
-0.0002124	-0.004	0.004	-0.0003608	-0.004	0.002	-0.0002124	-0.012	0.006	-0.0001062	-0.006	1.19209e-08	-0.0002124	-0.006	-0.008	-0.0004248	-1.49012e-09	-0.001	-0.0001062	-0.008	1.19209e-08	-0.0001062	-0.008	0.002
-0.000212	-0.008	0.004	-0.00036	-0.006	0.004	-0.000212	-0.004	-0.002	-0.000106	-0.006	-0.004	-0.000212	-0.006	1.19209e-08	-0.000424	-1.49012e-09	-0.001	-0.000106	-0.004	-0.004	-0.000106	-0.006	0.002
-0.0002116	-0.006	0.004	-0.0003592	-0.004	0.002	-0.0002116	-0.008	-0.002	-0.0001058	-0.006	1.19209e-08	-0.0002116	-0.004	0.004	-0.0004232	-0.002	-0.003	-0.0001058	-0.006	0.008	-0.0001058	-0.006	0.002
-0.0002112	-0.006	0.004	-0.0003584	-0.006	0.002	-0.0002112	-0.004	-0.002	-0.0001056	-0.006	-0.004	-0.0002112	-0.008	1.19209e-08	-0.0004224	0.002	0.000999995	-0.0001056	-0.006	0.004	-0.0001056	-0.008	0.004
-0.0002108	-0.002	0.004	-0.0003576	-0.006	0.002	-0.0002108	-0.008	0.006	-0.0001054	-0.008	1.19209e-08	-0.0002108	-0.008	0.004	-0.0004216	-0.002	-0.003	-0.0001054	-0.008	1.19209e-08	-0.0001054	-0.006	0.004
-0.0002104	-0.006	0.004	-0.0003568	-0.006	0.002	-0.0002104	-0.012	0.006	-0.0001052	-0.006	1.19209e-08	-0.0002104	-0.006	1.19209e-08	-0.0004208	-1.49012e-09	-0.003	-0.0001052	-0.01	0.004	-0.0001052	-0.006	0.002
-0.00021	-0.006	0.004	-0.000356	-0.006	0.004	-0.00021	-0.008	-0.002	-0.000105	-0.006	1.19209e-08	-0.00021	-0.006	0.004	-0.00042	-0.002	-0.001	-0.000105	-0.008	1.19209e-08	-0.000105	-0.008	0.004
-0.0002096	-0.006	0.002	-0.0003552	-0.006	0.004	-0.0002096	-0.008	-0.002	-0.0001048	-0.008	1.19209e-08	-0.0002096	-0.004	1.19209e-08	-0.0004192	-0.002	-0.001	-0.0001048	-0.008	0.004	-0.0001048	-0.004	0.004
-0.0002092	-0.004	0.004	-0.0003544	-0.01	0.002	-0.0002092	-0.004	-0.002	-0.0001046	-0.008	1.19209e-08	-0.0002092	-0.008	-0.004	-0.0004184	-1.49012e-09	0.000999995	-0.0001046	-0.006	-0.008	-0.0001046	-0.008	0.004
-0.0002088	-0.006	0.002	-0.0003536	-0.006	0.004	-0.0002088	-0.012	-0.002	-0.0001044	-0.008	1.19209e-08	-0.0002088	-0.008	1.19209e-08	-0.0004176	0.002	-0.001	-0.0001044	-0.006	1.19209e-08	-0.0001044	-0.006	0.004
-0.0002084	-0.008	0.004	-0.0003528	-0.008	0.002	-0.0002084	-0.004	-0.002	-0.0001042	-0.006	0.004	-0.0002084	-0.004	1.19209e-08	-0.0004168	-0.004	-0.001	-0.0001042	-0.006	1.19209e-08	-0.0001042	-0.002	0.002
-0.000208	-0.01	0.004	-0.000352	-0.008	0.002	-0.000208	-0.008	-0.002	-0.000104	-0.006	1.19209e-08	-0.000208	-0.006	1.19209e-08	-0.000416	-0.002	-0.001	-0.000104	-0.006	1.19209e-08	-0.000104	-0.004	0.004
-0.0002076	-0.006	0.002	-0.0003512	-0.008	0.002	-0.0002076	-0.004	-0.002	-0.0001038	-0.006	1.19209e-08	-0.0002076	-0.008	1.19209e-08	-0.0004152	0.002	-0.001	-0.0001038	-0.008	1.19209e-08	-0.0001038	-0.008	0.004
-0.0002072	-0.006	0.004	-0.0003504	-0.006	0.002	-0.0002072	-0.004	0.002	-0.0001036	-0.01	-0.004	-0.0002072	-0.008	1.19209e-08	-0.0004144	-0.002	-0.001	-0.0001036	-0.008	1.19209e-08	-0.0001036	-0.002	0.004
-0.0002068	-0.004	0.004	-0.0003496	-0.004	0.004	-0.0002068	-0.008	-0.002	-0.0001034	-0.008	1.19209e-08	-0.0002068	-0.008	0.004	-0.0004136	0.002	-0.001	-0.0001034	-0.006	0.004	-0.0001034	-0.006	0.004
-0.0002064	-0.004	0.004	-0.0003488	-0.006	0.002	-0.0002064	-0.004	-0.002	-0.0001032	-0.006	1.19209e-08	-0.0002064	-0.006	0.004	-0.0004128	-0.002	-0.001	-0.0001032	-0.008	0.008	-0.0001032	-0.008	0.004
-0.000206	-0.006	0.004	-0.000348	-0.006	0.002	-0.000206	-0.012	0.002	-0.000103	-0.008	1.19209e-08	-0.000206	-0.004	1.19209e-08	-0.000412	-0.004	0.000999995	-0.000103	-0.004	1.19209e-08	-0.000103	-0.008	0.004
-0.0002056	-0.008	0.008	-0.0003472	-0.004	0.002	-0.0002056	-0.008	0.002	-0.0001028	-0.008	0.004	-0.0002056	-0.006	1.19209e-08	-0.0004112	-1.49012e-09	-0.001	-0.0001028	-0.006	0.004	-0.0001028	-0.004	5.96047e-09
-0.0002052	-0.008	0.002	-0.0003464	-0.006	0.002	-0.0002052	-0.004	-0.002	-0.0001026	-0.008	1.19209e-08	-0.0002052	-0.006	1.19209e-08	-0.0004104	-0.002	-0.001	-0.0001026	-0.006	1.19209e-08	-0.0001026	-0.004	0.002
-0.0002048	-0.004	0.006	-0.0003456	-0.006	0.002	-0.0002048	-0.004	-0.002	-0.0001024	-0.01	1.19209e-08	-0.0002048	-0.008	1.19209e-08	-0.0004096	-1.49012e-09	-0.003	-0.0001024	-0.006	1.19209e-08	-0.0001024	-0.006	0.004
-0.0002044	-0.008	0.004	-0.0003448	-0.006	0.002	-0.0002044	-0.012	0.002	-0.0001022	-0.008	1.19209e-08	-0.0002044	-0.006	-0.004	-0.0004088	-0.002	-0.001	-0.0001022	-0.006	1.19209e-08	-0.0001022	-0.006	0.004
-0.000204	-0.004	0.002	-0.000344	-0.004	0.002	-0.000204	-0.008	0.002	-0.000102	-0.008	1.19209e-08	-0.000204	-0.008	1.19209e-08	-0.000408	-1.49012e-09	-0.003	-0.000102	-0.006	1.19209e-08	-0.000102	-0.006	0.006
-0.0002036	-0.008	0.004	-0.0003432	-0.006	0.004	-0.0002036	-0.008	0.006	-0.0001018	-0.006	1.19209e-08	-0.0002036	-0.006	0.004	-0.0004072	-1.49012e-09	0.003	-0.0001018	-0.008	0.004	-0.0001018	-0.006	0.004
-0.0002032	-0.01	0.006	-0.0003424	-0.006	5.96047e-09	-0.0002032	-0.004	-0.002	-0.0001016	-0.006	0.004	-0.0002032	-0.006	0.004	-0.0004064	-0.004	0.000999995	-0.0001016	-0.006	1.19209e-08	-0.0001016	-0.006	0.006
-0.0002028	-0.006	0.004	-0.0003416	-0.004	5.96047e-09	-0.0002028	-0.008	0.002	-0.0001014	-0.006	1.19209e-08	-0.0002028	-0.006	-0.004	-0.0004056	-1.49012e-09	0.000999995	-0.0001014	-0.004	1.19209e-08	-0.0001014	-0.006	0.004
-0.0002024	-0.004	0.006	-0.0003408	-0.006	0.002	-0.0002024	-0.016	0.002	-0.0001012	-0.006	-0.004	-0.0002024	-0.008	-0.004	-0.0004048	-1.49012e-09	0.000999995	-0.0001012	-0.006	-0.008	-0.0001012	-0.006	0.004
-0.000202	-0.006	0.004	-0.00034	-0.008	0.002	-0.000202	-0.008	-0.002	-0.000101	-0.004	0.008	-0.000202	-0.006	1.19209e-08	-0.000404	-1.49012e-09	-0.003	-0.000101	-0.006	-0.004	-0.000101	-0.006	0.004
-0.0002016	-0.006	0.002	-0.0003392	-0.002	0.004	-0.0002016	-0.004	-0.002	-0.0001008	-0.008	-0.004	-0.0002016	-0.006	0.004	-0.0004032	-0.002	-0.001	-0.0001008	-0.006	1.19209e-08	-0.0001008	-0.006	0.002
-0.0002012	-0.006	0.004	-0.0003384	-0.006	0.004	-0.0002012	-0.008	0.002	-0.0001006	-0.008	0.004	-0.0002012	-0.008	1.19209e-08	-0.0004024	-1.49012e-09	-0.003	-0.0001006	-0.006	1.19209e-08	-0.0001006	-0.004	0.002
-0.0002008	-0.01	0.004	-0.0003376	-0.008	0.002	-0.0002008	-0.004	0.002	-0.0001004	-0.006	1.19209e-08	-0.0002008	-0.006	0.008	-0.0004016	-0.002	0.000999995	-0.0001004	-0.004	0.004	-0.0001004	-0.004	0.004
-0.0002004	-0.01	0.004	-0.0003368	-0.006	0.004	-0.0002004	-0.008	-0.002	-0.0001002	-0.008	1.19209e-08	-0.0002004	-0.008	1.19209e-08	-0.0004008	0.002	0.000999995	-0.0001002	-0.004	0.004	-0.0001002	-0.008	0.004
-0.0002	-0.006	0.004	-0.000336	-0.008	0.004	-0.0002	-0.008	-0.002	-0.0001	-0.006	1.19209e-08	-0.0002	-0.008	1.19209e-08	-0.0004	-1.49012e-09	-0.003	-0.0001	-0.006	1.19209e-08	-0.0001	-0.008	0.004
-0.0001996	-0.006	0.008	-0.0003352	-0.008	0.002	-0.0001996	-0.004	0.002	-9.98e-05	-0.006	1.19209e-08	-0.0001996	-0.008	1.19209e-08	-0.0003992	-0.006	-0.001	-9.98e-05	-0.006	1.19209e-08	-9.98e-05	-0.008	0.004
-0.0001992	-0.008	0.004	-0.0003344	-0.008	0.002	-0.0001992	-0.008	0.002	-9.96e-05	-0.006	1.19209e-08	-0.0001992	-0.008	1.19209e-08	-0.0003984	0.002	-0.001	-9.96e-05	-0.006	1.19209e-08	-9.96e-05	-0.006	0.004
-0.0001988	-0.006	0.002	-0.0003336	-0.006	0.002	-0.0001988	-0.008	0.002	-9.94e-05	-0.004	1.19209e-08	-0.0001988	-0.006	-0.004	-0.0003976	-0.002	-0.001	-9.94e-05	-0.006	-0.004	-9.94e-05	-0.004	0.002
-0.0001984	-0.008	0.006	-0.0003328	-0.006	0.004	-0.0001984	-0.012	-0.002	-9.92e-05	-0.006	0.004	-0.0001984	-0.004	-0.004	-0.0003968	-0.002	0.003	-9.92e-05	-0.006	1.19209e-08	-9.92e-05	-0.004	0.004
-0.000198	-0.008	0.002	-0.000332	-0.008	0.004	-0.000198	-0.012	0.006	-9.9e-05	-0.008	0.008	-0.000198	-0.006	1.19209e-08	-0.000396	-1.49012e-09	-0.001	-9.9e-05	-0.006	-0.004	-9.9e-05	-0.004	0.002
-0.0001976	-0.006	0.004	-0.0003312	-0.008	0.004	-0.0001976	-0.004	-0.006	-9.88e-05	-0.008	1.19209e-08	-0.0001976	-0.006	-0.004	-0.0003952	-1.49012e-09	-0.003	-9.88e-05	-0.006	0.004	-9.88e-05	-0.008	0.006
-0.0001972	-0.008	0.004	-0.0003304	-0.008	0.002	-0.0001972	-0.008	0.002	-9.86e-05	-0.008	1.19209e-08	-0.0001972	-0.008	1.19209e-08	-0.0003944	-1.49012e-09	0.005	-9.86e-05	-0.004	1.19209e-08	-9.86e-05	-0.008	0.004
-0.0001968	-0.008	0.006	-0.0003296	-0.006	0.002	-0.0001968	-2.98023e-09	0.002	-9.84e-05	-0.006	1.19209e-08	-0.0001968	-0.006	-0.004	-0.0003936	-1.49012e-09	-0.001	-9.84e-05	-0.006	1.19209e-08	-9.84e-05	-0.008	0.004
-0.0001964	-0.004	0.004	-0.0003288	-0.006	0.002	-0.0001964	-0.004	-0.002	-9.82e-05	-0.01	1.19209e-08	-0.0001964	-0.006	-0.004	-0.0003928	-1.49012e-09	0.000999995	-9.82e-05	-0.004	0.004	-9.82e-05	-0.008	0.004
-0.000196	-0.008	0.004	-0.000328	-0.008	0.002	-0.000196	-0.012	0.002	-9.8e-05	-0.006	-0.004	-0.000196	-0.006	0.004	-0.000392	-0.002	-0.003	-9.8e-05	-0.008	0.004	-9.8e-05	-0.004	0.002
-0.0001956	-0.008	0.008	-0.0003272	-0.006	0.004	-0.0001956	-2.98023e-09	0.006	-9.78e-05	-0.008	1.19209e-08	-0.0001956	-0.004	0.004	-0.0003912	-0.004	-0.001	-9.78e-05	-0.006	1.19209e-08	-9.78e-05	-0.004	0.004
-0.0001952	-0.006	0.006	-0.0003264	-0.006	0.004	-0.0001952	-0.004	-0.006	-9.76e-05	-0.008	1.19209e-08	-0.0001952	-0.006	1.19209e-08	-0.0003904	-0.002	-0.001	-9.76e-05	-0.006	1.19209e-08	-9.76e-05	-0.006	0.002
-0.0001948	-0.006	0.004	-0.0003256	-0.008	0.002	-0.0001948	-0.008	-0.006	-9.74e-05	-0.006	1.19209e-08	-0.0001948	-0.004	1.19209e-08	-0.0003896	-1.49012e-09	-0.001	-9.74e-05	-0.004	0.008	-9.74e-05	-0.008	0.002
-0.0001944	-0.008	0.002	-0.0003248	-0.006	0.002	-0.0001944	-0.004	-0.002	-9.72e-05	-0.006	1.19209e-08	-0.0001944	-0.006	-0.008	-0.0003888	-1.49012e-09	-0.001	-9.72e-05	-0.006	1.19209e-08	-9.72e-05	-0.006	0.006
-0.000194	-0.006	0.004	-0.000324	-0.006	5.96047e-09	-0.000194	-0.004	0.002	-9.7e-05	-0.008	1.19209e-08	-0.000194	-0.004	1.19209e-08	-0.000388	0.002	-0.001	-9.7e-05	-0.008	1.19209e-08	-9.7e-05	-0.004	0.004
-0.0001936	-0.006	0.006	-0.0003232	-0.006	0.002	-0.0001936	-0.004	0.002	-9.68e-05	-0.006	1.19209e-08	-0.0001936	-0.008	0.004	-0.0003872	-0.002	-0.003	-9.68e-05	-0.006	1.19209e-08	-9.68e-05	-0.008	0.004
-0.0001932	-0.008	0.004	-0.0003224	-0.008	0.004	-0.0001932	-2.98023e-09	0.002	-9.66e-05	-0.006	1.19209e-08	-0.0001932	-0.006	1.19209e-08	-0.0003864	-0.002	0.000999995	-9.66e-05	-0.006	0.004	-9.66e-05	-0.008	0.004
-0.0001928	-0.008	0.004	-0.0003216	-0.008	0.004	-0.0001928	-0.012	0.006	-9.64e-05	-0.006	1.19209e-08	-0.0001928	-0.008	-0.008	-0.0003856	-0.002	-0.003	-9.64e-05	-0.006	1.19209e-08	-9.64e-05	-0.006	0.004
-0.0001924	-0.004	0.002	-0.0003208	-0.006	0.002	-0.0001924	-0.004	-0.002	-9.62e-05	-0.008	1.19209e-08	-0.0001924	-0.008	-0.004	-0.0003848	0.002	-0.001	-9.62e-05	-0.006	1.19209e-08	-9.62e-05	-0.006	0.004
-0.000192	-0.008	0.004	-0.00032	-0.008	0.002	-0.000192	-0.004	0.002	-9.6e-05	-0.004	1.19209e-08	-0.000192	-0.006	1.19209e-08	-0.000384	-0.004	-0.001	-9.6e-05	-0.004	0.004	-9.6e-05	-0.004	0.004
-0.0001916	-0.008	0.004	-0.0003192	-0.004	5.96047e-09	-0.0001916	-0.004	0.002	-9.58e-05	-0.006	1.19209e-08	-0.0001916	-0.006	1.19209e-08	-0.0003832	-0.002	-0.001	-9.58e-05	-0.004	1.19209e-08	-9.58e-05	-0.006	0.006
-0.0001912	-0.006	0.004	-0.0003184	-0.006	0.002	-0.0001912	-0.004	-0.002	-9.56e-05	-0.002	1.19209e-08	-0.0001912	-0.006	1.19209e-08	-0.0003824	-0.002	-0.001	-9.56e-05	-0.004	1.19209e-08	-9.56e-05	-0.004	0.004
-0.0001908	-0.006	0.006	-0.0003176	-0.006	0.004	-0.0001908	-0.012	0.006	-9.54e-05	-0.006	0.004	-0.0001908	-0.008	1.19209e-08	-0.0003816	0.002	-0.001	-9.54e-05	-0.004	0.004	-9.54e-05	-0.004	0.004
-0.0001904	-0.008	0.002	-0.0003168	-0.006	0.002	-0.0001904	-0.008	0.002	-9.52e-05	-0.004	1.19209e-08	-0.0001904	-0.004	-0.004	-0.0003808	-0.002	-0.001	-9.52e-05	-0.006	1.19209e-08	-9.52e-05	-0.004	0.006
-0.00019	-0.004	0.004	-0.000316	-0.008	0.002	-0.00019	-0.008	-0.002	-9.5e-05	-0.006	0.004	-0.00019	-0.006	1.19209e-08	-0.00038	-1.49012e-09	-0.001	-9.5e-05	-0.004	1.19209e-08	-9.5e-05	-0.006	0.004
-0.0001896	-0.004	0.004	-0.0003152	-0.004	0.002	-0.0001896	-2.98023e-09	0.002	-9.48e-05	-0.006	0.004	-0.0001896	-0.006	1.19209e-08	-0.0003792	-0.004	-0.003	-9.48e-05	-0.006	1.19209e-08	-9.48e-05	-0.006	0.002
-0.0001892	-0.008	0.004	-0.0003144	-0.008	0.002	-0.0001892	-0.008	0.002	-9.46e-05	-0.006	1.19209e-08	-0.0001892	-0.006	0.004	-0.0003784	-1.49012e-09	-0.001	-9.46e-05	-0.008	1.19209e-08	-9.46e-05	-0.006	0.004
-0.0001888	-0.008	0.004	-0.0003136	-0.006	0.004	-0.0001888	-0.004	0.002	-9.44e-05	-0.006	1.19209e-08	-0.0001888	-0.008	1.19209e-08	-0.0003776	-1.49012e-09	-0.001	-9.44e-05	-0.008	1.19209e-08	-9.44e-05	-0.008	0.002
-0.0001884	-0.004	0.004	-0.0003128	-0.008	0.002	-0.0001884	-0.004	0.002	-9.42e-05	-0.006	1.19209e-08	-0.0001884	-0.008	1.19209e-08	-0.0003768	-0.002	-0.003	-9.42e-05	-0.008	1.19209e-08	-9.42e-05	-0.008	0.002
-0.000188	-0.008	0.002	-0.000312	-0.008	0.002	-0.000188	-0.008	0.002	-9.4e-05	-0.004	1.19209e-08	-0.000188	-0.008	-0.004	-0.000376	-1.49012e-09	0.003	-9.4e-05	-0.008	0.004	-9.4e-05	-0.004	0.004
-0.0001876	-0.006	0.004	-0.0003112	-0.008	0.004	-0.0001876	-0.004	-0.002	-9.38e-05	-0.006	-0.004	-0.0001876	-0.006	-0.004	-0.0003752	0.002	-0.001	-9.38e-05	-0.002	0.004	-9.38e-05	-0.004	0.006
-0.0001872	-0.004	0.002	-0.0003104	-0.004	0.002	-0.0001872	-0.008	-0.002	-9.36e-05	-0.008	1.19209e-08	-0.0001872	-0.006	-0.004	-0.0003744	-0.002	-0.001	-9.36e-05	-0.006	1.19209e-08	-9.36e-05	-0.002	0.004
-0.0001868	-0.008	0.004	-0.0003096	-0.008	0.004	-0.0001868	-0.004	-0.002	-9.34e-05	-0.008	1.19209e-08	-0.0001868	-0.008	-0.004	-0.0003736	0.002	-0.001	-9.34e-05	-0.004	0.004	-9.34e-05	-0.004	0.004
-0.0001864	-0.006	0.006	-0.0003088	-0.006	0.004	-0.0001864	-0.012	-0.002	-9.32e-05	-0.006	1.19209e-08	-0.0001864	-0.008	1.19209e-08	-0.0003728	0.002	-0.003	-9.32e-05	-0.004	1.19209e-08	-9.32e-05	-0.006	0.004
-0.000186	-0.004	0.002	-0.000308	-0.006	5.96047e-09	-0.000186	-2.98023e-09	0.002	-9.3e-05	-0.006	-0.004	-0.000186	-0.006	0.004	-0.000372	-0.002	-0.001	-9.3e-05	-0.006	0.004	-9.3e-05	-0.006	0.006
-0.0001856	-0.006	0.004	-0.0003072	-0.008	0.002	-0.0001856	-0.008	-0.002	-9.28e-05	-0.006	-0.004	-0.0001856	-0.006	-0.004	-0.0003712	0.002	-0.003	-9.28e-05	-0.006	0.004	-9.28e-05	-0.006	0.002
-0.0001852	-0.008	0.002	-0.0003064	-0.006	0.004	-0.0001852	-0.008	-0.002	-9.26e-05	-0.008	1.19209e-08	-0.0001852	-0.008	1.19209e-08	-0.0003704	-0.002	-0.001	-9.26e-05	-0.006	0.004	-9.26e-05	-0.008	0.006
-0.0001848	-0.006	0.004	-0.0003056	-0.006	0.002	-0.0001848	-0.008	-0.002	-9.24e-05	-0.006	0.004	-0.0001848	-0.008	-0.004	-0.0003696	-1.49012e-09	-0.001	-9.24e-05	-0.004	1.19209e-08	-9.24e-05	-0.004	0.002
-0.0001844	-0.008	0.006	-0.0003048	-0.006	0.004	-0.0001844	-0.008	0.002	-9.22e-05	-0.006	1.19209e-08	-0.0001844	-0.006	1.19209e-08	-0.0003688	-1.49012e-09	-0.001	-9.22e-05	-0.006	0.004	-9.22e-05	-0.004	0.004
-0.000184	-0.008	0.004	-0.000304	-0.008	0.004	-0.000184	-0.004	-0.002	-9.2e-05	-0.006	0.008	-0.000184	-0.008	-0.004	-0.000368	-0.004	-0.001	-9.2e-05	-0.008	0.004	-9.2e-05	-0.006	0.006
-0.0001836	-0.002	0.002	-0.0003032	-0.008	0.004	-0.0001836	-0.004	-0.002	-9.18e-05	-0.008	-0.004	-0.0001836	-0.008	1.19209e-08	-0.0003672	0.002	-0.001	-9.18e-05	-0.006	1.19209e-08	-9.18e-05	-0.004	0.006
-0.0001832	-0.004	0.006	-0.0003024	-0.006	0.002	-0.0001832	-0.016	-0.002	-9.16e-05	-0.008	1.19209e-08	-0.0001832	-0.01	0.004	-0.0003664	-0.002	-0.001	-9.16e-05	-0.006	1.19209e-08	-9.16e-05	-0.006	0.004
-0.0001828	-0.01	0.002	-0.0003016	-0.004	5.96047e-09	-0.0001828	-0.008	0.002	-9.14e-05	-0.004	1.19209e-08	-0.0001828	-0.006	1.19209e-08	-0.0003656	-1.49012e-09	0.000999995	-9.14e-05	-0.006	-0.004	-9.14e-05	-0.006	0.006
-0.0001824	-0.006	0.002	-0.0003008	-0.008	5.96047e-09	-0.0001824	-0.004	0.002	-9.12e-05	-0.006	1.19209e-08	-0.0001824	-0.006	-0.004	-0.0003648	0.002	-0.003	-9.12e-05	-0.008	1.19209e-08	-9.12e-05	-0.006	0.002
-0.000182	-0.002	0.006	-0.0003	-0.008	0.002	-0.000182	-0.008	-0.002	-9.1e-05	-0.004	1.19209e-08	-0.000182	-0.008	-0.004	-0.000364	-0.002	-0.003	-9.1e-05	-0.006	1.19209e-08	-9.1e-05	-0.008	0.004
-0.0001816	-0.006	0.002	-0.0002992	-0.006	0.006	-0.0001816	-0.012	-0.002	-9.08e-05	-0.006	1.19209e-08	-0.0001816	-0.006	-0.004	-0.0003632	-1.49012e-09	-0.001	-9.08e-05	-0.006	0.004	-9.08e-05	-0.008	0.002
-0.0001812	-0.006	0.006	-0.0002984	-0.006	0.002	-0.0001812	-0.008	0.006	-9.06e-05	-0.006	1.19209e-08	-0.0001812	-0.006	-0.004	-0.0003624	-0.002	0.000999995	-9.06e-05	-0.008	0.004	-9.06e-05	-0.004	0.004
-0.0001808	-0.008	0.004	-0.0002976	-0.006	0.002	-0.0001808	-0.004	0.002	-9.04e-05	-0.006	-0.004	-0.0001808	-0.008	1.19209e-08	-0.0003616	-0.004	-0.001	-9.04e-05	-0.008	-0.004	-9.04e-05	-0.004	0.002
-0.0001804	-0.006	0.004	-0.0002968	-0.008	0.002	-0.0001804	-0.008	-0.002	-9.02e-05	-0.004	0.004	-0.0001804	-0.008	1.19209e-08	-0.0003608	-0.002	-0.001	-9.02e-05	-0.004	0.004	-9.02e-05	-0.004	0.006
-0.00018	-0.01	0.002	-0.000296	-0.006	0.004	-0.00018	-0.012	-0.002	-9e-05	-0.006	1.19209e-08	-0.00018	-0.008	-0.008	-0.00036	-1.49012e-09	-0.003	-9e-05	-0.006	1.19209e-08	-9e-05	-0.004	0.004
-0.0001796	-0.004	5.96047e-09	-0.0002952	-0.006	0.004	-0.0001796	-0.004	0.002	-8.98e-05	-0.008	1.19209e-08	-0.0001796	-0.008	1.19209e-08	-0.0003592	-1.49012e-09	-0.001	-8.98e-05	-0.004	1.19209e-08	-8.98e-05	-0.004	0.004
-0.0001792	-0.008	0.004	-0.0002944	-0.008	0.004	-0.0001792	-0.008	0.002	-8.96e-05	-0.008	1.19209e-08	-0.0001792	-0.008	-0.004	-0.0003584	-1.49012e-09	-0.001	-8.96e-05	-0.006	1.19209e-08	-8.96e-05	-0.008	0.004
-0.0001788	-0.008	0.002	-0.0002936	-0.004	0.004	-0.0001788	-0.008	-0.002	-8.94e-05	-0.008	-0.004	-0.0001788	-0.006	1.19209e-08	-0.0003576	-0.004	-0.001	-8.94e-05	-0.004	-0.004	-8.94e-05	-0.008	0.004
-0.0001784	-0.006	0.004	-0.0002928	-0.01	0.004	-0.0001784	-0.004	0.006	-8.92e-05	-0.006	1.19209e-08	-0.0001784	-0.006	0.004	-0.0003568	-0.002	0.003	-8.92e-05	-0.008	1.19209e-08	-8.92e-05	-0.006	0.004
-0.000178	-0.004	0.004	-0.000292	-0.006	0.004	-0.000178	-0.004	-0.002	-8.9e-05	-0.006	0.004	-0.000178	-0.008	0.004	-0.000356	-1.49012e-09	-0.001	-8.9e-05	-0.004	0.004	-8.9e-05	-0.006	0.004
-0.0001776	-0.008	0.004	-0.0002912	-0.006	0.002	-0.0001776	-0.008	0.002	-8.88e-05	-0.006	-0.004	-0.0001776	-0.01	0.004	-0.0003552	-0.002	-0.001	-8.88e-05	-0.004	-0.004	-8.88e-05	-0.002	0.004
-0.0001772	-0.006	0.002	-0.0002904	-0.008	0.002	-0.0001772	-0.004	0.006	-8.86e-05	-0.008	-0.004	-0.0001772	-0.006	1.19209e-08	-0.0003544	-0.002	0.000999995	-8.86e-05	-0.006	1.19209e-08	-8.86e-05	-0.004	0.004
-0.0001768	-0.006	0.006	-0.0002896	-0.008	0.004	-0.0001768	-0.004	-0.002	-8.84e-05	-0.008	-0.008	-0.0001768	-0.008	1.19209e-08	-0.0003536	-0.002	-0.001	-8.84e-05	-0.006	0.004	-8.84e-05	-0.004	0.004
-0.0001764	-0.006	0.004	-0.0002888	-0.008	0.002	-0.0001764	-0.008	0.002	-8.82e-05	-0.008	-0.004	-0.0001764	-0.006	0.004	-0.0003528	0.002	-0.001	-8.82e-05	-0.004	1.19209e-08	-8.82e-05	-0.006	0.004
-0.000176	-0.004	0.006	-0.000288	-0.008	0.004	-0.000176	-0.012	-0.002	-8.8e-05	-0.008	1.19209e-08	-0.000176	-0.006	1.19209e-08	-0.000352	-0.002	0.000999995	-8.8e-05	-0.006	1.19209e-08	-8.8e-05	-0.008	0.004
-0.0001756	-0.006	0.004	-0.0002872	-0.006	0.002	-0.0001756	-0.004	-0.002	-8.78e-05	-0.008	-0.004	-0.0001756	-0.004	-0.004	-0.0003512	-1.49012e-09	-0.001	-8.78e-05	-0.004	-0.004	-8.78e-05	-0.006	0.002
-0.0001752	-0.008	0.002	-0.0002864	-0.008	0.002	-0.0001752	-0.008	-0.002	-8.76e-05	-0.006	0.004	-0.0001752	-0.006	1.19209e-08	-0.0003504	-1.49012e-09	-0.001	-8.76e-05	-0.006	1.19209e-08	-8.76e-05	-0.008	0.002
-0.0001748	-0.006	0.002	-0.0002856	-0.006	0.004	-0.0001748	-0.012	0.002	-8.74e-05	-0.006	1.19209e-08	-0.0001748	-0.006	1.19209e-08	-0.0003496	-0.002	-0.003	-8.74e-05	-0.004	1.19209e-08	-8.74e-05	-0.008	0.004
-0.0001744	-0.004	0.004	-0.0002848	-0.008	0.002	-0.0001744	-0.008	0.002	-8.72e-05	-0.008	1.19209e-08	-0.0001744	-0.008	1.19209e-08	-0.0003488	-0.004	0.000999995	-8.72e-05	-0.004	1.19209e-08	-8.72e-05	-0.008	0.004
-0.000174	-0.004	0.006	-0.000284	-0.004	0.002	-0.000174	-0.008	0.002	-8.7e-05	-0.008	1.19209e-08	-0.000174	-0.008	1.19209e-08	-0.000348	0.002	0.000999995	-8.7e-05	-0.004	1.19209e-08	-8.7e-05	-0.006	0.002
-0.0001736	-0.008	0.002	-0.0002832	-0.006	0.004	-0.0001736	-0.008	-0.006	-8.68e-05	-0.008	-0.004	-0.0001736	-0.004	0.004	-0.0003472	-0.002	-0.001	-8.68e-05	-0.006	1.19209e-08	-8.68e-05	-0.004	5.96047e-09
-0.0001732	-0.004	0.006	-0.0002824	-0.004	0.004	-0.0001732	-0.008	-0.002	-8.66e-05	-0.008	1.19209e-08	-0.0001732	-0.004	0.004	-0.0003464	-0.002	0.000999995	-8.66e-05	-0.006	-0.004	-8.66e-05	-0.004	0.002
-0.0001728	-0.004	0.002	-0.0002816	-0.004	0.002	-0.0001728	-0.008	0.002	-8.64e-05	-0.006	-0.004	-0.0001728	-0.006	1.19209e-08	-0.0003456	0.002	-0.001	-8.64e-05	-0.004	1.19209e-08	-8.64e-05	-0.002	0.002
-0.0001724	-0.006	0.004	-0.0002808	-0.004	0.002	-0.0001724	-2.98023e-09	-0.002	-8.62e-05	-0.01	1.19209e-08	-0.0001724	-0.008	-0.008	-0.0003448	-0.004	-0.001	-8.62e-05	-0.008	1.19209e-08	-8.62e-05	-0.002	0.002
-0.000172	-0.004	0.004	-0.00028	-0.006	0.002	-0.000172	-0.008	-0.002	-8.6e-05	-0.006	1.19209e-08	-0.000172	-0.006	1.19209e-08	-0.000344	-1.49012e-09	-0.001	-8.6e-05	-0.004	1.19209e-08	-8.6e-05	-0.008	0.006
-0.0001716	-0.004	0.002	-0.0002792	-0.006	0.002	-0.0001716	-0.008	0.002	-8.58e-05	-0.008	1.19209e-08	-0.0001716	-0.006	-0.004	-0.0003432	-1.49012e-09	0.000999995	-8.58e-05	-0.004	1.19209e-08	-8.58e-05	-0.01	0.002
-0.0001712	-0.008	0.004	-0.0002784	-0.004	0.004	-0.0001712	-0.004	-0.002	-8.56e-05	-0.008	1.19209e-08	-0.0001712	-0.004	0.004	-0.0003424	-0.002	-0.003	-8.56e-05	-0.006	-0.004	-8.56e-05	-0.01	0.004
-0.0001708	-0.01	0.004	-0.0002776	-0.004	0.004	-0.0001708	-0.012	-0.002	-8.54e-05	-0.008	1.19209e-08	-0.0001708	-0.006	0.008	-0.0003416	-1.49012e-09	0.000999995	-8.54e-05	-0.004	0.004	-8.54e-05	-0.008	0.004
-0.0001704	-0.006	0.004	-0.0002768	-0.006	0.002	-0.0001704	-0.008	-0.002	-8.52e-05	-0.008	-0.008	-0.0001704	-0.006	1.19209e-08	-0.0003408	-0.002	-0.001	-8.52e-05	-0.004	1.19209e-08	-8.52e-05	-0.008	0.004
-0.00017	-0.006	0.004	-0.000276	-0.004	0.002	-0.00017	-0.012	-0.002	-8.5e-05	-0.006	1.19209e-08	-0.00017	-0.006	-0.004	-0.00034	-0.002	-0.001	-8.5e-05	-0.006	1.19209e-08	-8.5e-05	-0.004	0.002
-0.0001696	-0.004	0.002	-0.0002752	-0.008	0.002	-0.0001696	-0.008	0.002	-8.48e-05	-0.008	1.19209e-08	-0.0001696	-0.006	1.19209e-08	-0.0003392	-0.002	0.000999995	-8.48e-05	-0.008	1.19209e-08	-8.48e-05	-0.006	0.004
-0.0001692	-0.008	0.006	-0.0002744	-0.006	5.96047e-09	-0.0001692	-0.012	-0.002	-8.46e-05	-0.006	1.19209e-08	-0.0001692	-0.006	1.19209e-08	-0.0003384	0.004	0.000999995	-8.46e-05	-0.008	0.004	-8.46e-05	-0.006	0.004
-0.0001688	-0.01	0.004	-0.0002736	-0.008	0.002	-0.0001688	-0.004	0.002	-8.44e-05	-0.01	-0.004	-0.0001688	-0.008	1.19209e-08	-0.0003376	-1.49012e-09	-0.001	-8.44e-05	-0.006	-0.004	-8.44e-05	-0.004	0.004
-0.0001684	-0.01	0.004	-0.0002728	-0.006	0.002	-0.0001684	-0.004	-0.002	-8.42e-05	-0.006	1.19209e-08	-0.0001684	-0.006	-0.004	-0.0003368	-1.49012e-09	-0.001	-8.42e-05	-0.006	-0.008	-8.42e-05	-0.008	0.004
-0.000168	-0.004	0.002	-0.000272	-0.008	0.002	-0.000168	-0.008	0.002	-8.4e-05	-0.008	1.19209e-08	-0.000168	-0.006	-0.004	-0.000336	-1.49012e-09	-0.001	-8.4e-05	-0.006	1.19209e-08	-8.4e-05	-0.006	0.004
-0.0001676	-0.01	0.004	-0.0002712	-0.006	0.002	-0.0001676	-2.98023e-09	0.002	-8.38e-05	-0.008	1.19209e-08	-0.0001676	-0.004	0.008	-0.0003352	-0.004	-0.003	-8.38e-05	-0.004	1.19209e-08	-8.38e-05	-0.006	0.004
-0.0001672	-0.006	0.004	-0.0002704	-0.006	0.002	-0.0001672	-0.004	0.006	-8.36e-05	-0.01	1.19209e-08	-0.0001672	-0.008	1.19209e-08	-0.0003344	0.002	0.000999995	-8.36e-05	-0.004	0.004	-8.36e-05	-0.004	0.004
-0.0001668	-0.008	0.004	-0.0002696	-0.008	0.004	-0.0001668	-0.004	0.002	-8.34e-05	-0.01	1.19209e-08	-0.0001668	-0.006	-0.008	-0.0003336	-1.49012e-09	-0.001	-8.34e-05	-0.004	1.19209e-08	-8.34e-05	-0.006	0.004
-0.0001664	-0.006	0.002	-0.0002688	-0.006	0.004	-0.0001664	-0.008	-0.006	-8.32e-05	-0.01	-0.004	-0.0001664	-0.008	-0.004	-0.0003328	-0.002	-0.003	-8.32e-05	-0.006	0.004	-8.32e-05	-0.008	0.002
-0.000166	-0.006	0.004	-0.000268	-0.008	0.002	-0.000166	-0.008	0.006	-8.3e-05	-0.006	-0.008	-0.000166	-0.006	1.19209e-08	-0.000332	0.002	-0.001	-8.3e-05	-0.006	1.19209e-08	-8.3e-05	-0.006	0.008
-0.0001656	-0.008	0.004	-0.0002672	-0.006	0.002	-0.0001656	-0.004	-0.002	-8.28e-05	-0.008	1.19209e-08	-0.0001656	-0.006	-0.004	-0.0003312	-0.002	-0.003	-8.28e-05	-0.004	1.19209e-08	-8.28e-05	-0.002	0.004
-0.0001652	-0.006	0.004	-0.0002664	-0.006	0.004	-0.0001652	-0.004	-0.002	-8.26e-05	-0.008	-0.004	-0.0001652	-0.006	0.004	-0.0003304	-0.002	0.000999995	-8.26e-05	-0.006	1.19209e-08	-8.26e-05	-0.006	0.006
-0.0001648	-0.004	0.006	-0.0002656	-0.006	0.004	-0.0001648	-0.008	0.01	-8.24e-05	-0.006	-0.004	-0.0001648	-0.008	1.19209e-08	-0.0003296	-1.49012e-09	-0.001	-8.24e-05	-0.006	0.008	-8.24e-05	-0.006	0.006
-0.0001644	-0.008	0.004	-0.0002648	-0.004	0.002	-0.0001644	-0.008	-0.002	-8.22e-05	-0.006	1.19209e-08	-0.0001644	-0.01	1.19209e-08	-0.0003288	-0.002	-0.001	-8.22e-05	-0.008	1.19209e-08	-8.22e-05	-0.006	0.002
-0.000164	-0.006	0.004	-0.000264	-0.01	0.004	-0.000164	-0.004	0.002	-8.2e-05	-0.006	0.004	-0.000164	-0.006	1.19209e-08	-0.000328	0.004	-0.001	-8.2e-05	-0.008	0.008	-8.2e-05	-0.008	0.002
-0.0001636	-0.008	0.004	-0.0002632	-0.006	0.002	-0.0001636	-2.98023e-09	0.006	-8.18e-05	-0.006	-0.004	-0.0001636	-0.008	1.19209e-08	-0.0003272	0.002	-0.003	-8.18e-05	-0.008	1.19209e-08	-8.18e-05	-0.006	0.004
-0.0001632	-0.006	0.002	-0.0002624	-0.006	5.96047e-09	-0.0001632	-0.012	0.006	-8.16e-05	-0.008	1.19209e-08	-0.0001632	-0.006	1.19209e-08	-0.0003264	-0.002	-0.001	-8.16e-05	-0.008	0.004	-8.16e-05	-0.008	0.004
-0.0001628	-0.008	5.96047e-09	-0.0002616	-0.008	0.002	-0.0001628	-0.004	-0.002	-8.14e-05	-0.006	-0.004	-0.0001628	-0.01	0.004	-0.0003256	-1.49012e-09	-0.001	-8.14e-05	-0.008	-0.004	-8.14e-05	-0.006	0.004
-0.0001624	-0.004	0.002	-0.0002608	-0.008	0.002	-0.0001624	-0.004	0.002	-8.12e-05	-0.01	0.004	-0.0001624	-0.008	0.004	-0.0003248	-0.002	-0.001	-8.12e-05	-0.004	1.19209e-08	-8.12e-05	-0.004	0.002
-0.000162	-0.008	0.002	-0.00026	-0.006	0.006	-0.000162	-0.004	-0.002	-8.1e-05	-0.01	1.19209e-08	-0.000162	-0.006	0.004	-0.000324	-0.004	-0.001	-8.1e-05	-0.004	0.004	-8.1e-05	-0.006	0.004
-0.0001616	-0.008	0.004	-0.0002592	-0.006	0.004	-0.0001616	-0.004	-0.002	-8.08e-05	-0.01	1.19209e-08	-0.0001616	-0.004	1.19209e-08	-0.0003232	0.002	-0.001	-8.08e-05	-0.008	1.19209e-08	-8.08e-05	-0.004	0.002
-0.0001612	-0.008	0.002	-0.0002584	-0.006	0.004	-0.0001612	-0.012	-0.002	-8.06e-05	-0.01	1.19209e-08	-0.0001612	-0.006	1.19209e-08	-0.0003224	-0.002	-0.003	-8.06e-05	-0.008	1.19209e-08	-8.06e-05	-0.006	0.004
-0.0001608	-0.004	0.002	-0.0002576	-0.008	0.004	-0.0001608	-0.008	0.002	-8.04e-05	-0.008	1.19209e-08	-0.0001608	-0.01	1.19209e-08	-0.0003216	-0.002	-0.001	-8.04e-05	-0.01	-0.008	-8.04e-05	-0.006	0.002
-0.0001604	-0.004	0.006	-0.0002568	-0.004	0.002	-0.0001604	-0.004	0.01	-8.02e-05	-0.008	1.19209e-08	-0.0001604	-0.006	1.19209e-08	-0.0003208	0.002	0.000999995	-8.02e-05	-0.004	1.19209e-08	-8.02e-05	-0.008	0.004
-0.00016	-0.006	0.008	-0.000256	-0.006	0.004	-0.00016	-0.004	0.002	-8e-05	-0.008	-0.004	-0.00016	-0.008	-0.004	-0.00032	-0.006	-0.001	-8e-05	-0.004	1.19209e-08	-8e-05	-0.006	0.002
-0.0001596	-0.004	0.006	-0.0002552	-0.008	0.002	-0.0001596	-2.98023e-09	0.002	-7.98e-05	-0.004	1.19209e-08	-0.0001596	-0.006	1.19209e-08	-0.0003192	0.004	0.000999995	-7.98e-05	-0.006	0.004	-7.98e-05	-0.006	0.004
-0.0001592	-0.004	0.004	-0.0002544	-0.006	0.002	-0.0001592	-0.004	-0.002	-7.96e-05	-0.006	0.004	-0.0001592	-0.006	-0.004	-0.0003184	-0.002	-0.003	-7.96e-05	-0.006	0.008	-7.96e-05	-0.006	0.004
-0.0001588	-0.006	0.004	-0.0002536	-0.008	0.002	-0.0001588	-0.012	0.002	-7.94e-05	-0.006	1.19209e-08	-0.0001588	-0.006	0.004	-0.0003176	-0.002	-0.003	-7.94e-05	-0.008	1.19209e-08	-7.94e-05	-0.006	0.002
-0.0001584	-0.008	0.006	-0.0002528	-0.006	0.004	-0.0001584	-0.004	0.006	-7.92e-05	-0.006	-0.004	-0.0001584	-0.006	1.19209e-08	-0.0003168	0.002	-0.001	-7.92e-05	-0.006	1.19209e-08	-7.92e-05	-0.006	0.004
-0.000158	-0.006	0.002	-0.000252	-0.008	0.004	-0.000158	-0.004	-0.002	-7.9e-05	-0.008	-0.004	-0.000158	-0.006	1.19209e-08	-0.000316	-1.49012e-09	-0.001	-7.9e-05	-0.004	0.004	-7.9e-05	-0.004	0.004
-0.0001576	-0.004	0.004	-0.0002512	-0.004	0.002	-0.0001576	-0.008	0.002	-7.88e-05	-0.006	1.19209e-08	-0.0001576	-0.008	0.008	-0.0003152	0.002	0.003	-7.88e-05	-0.004	1.19209e-08	-7.88e-05	-0.006	0.004
-0.0001572	-0.006	0.006	-0.0002504	-0.01	0.002	-0.0001572	-0.004	0.006	-7.86e-05	-0.004	-0.004	-0.0001572	-0.006	1.19209e-08	-0.0003144	-1.49012e-09	-0.001	-7.86e-05	-0.006	1.19209e-08	-7.86e-05	-0.006	0.006
-0.0001568	-0.008	0.006	-0.0002496	-0.004	0.004	-0.0001568	-0.004	0.002	-7.84e-05	-0.006	1.19209e-08	-0.0001568	-0.01	1.19209e-08	-0.0003136	-0.004	-0.001	-7.84e-05	-0.006	-0.004	-7.84e-05	-0.006	0.002
-0.0001564	-0.006	0.004	-0.0002488	-0.006	0.004	-0.0001564	-0.008	0.002	-7.82e-05	-0.008	1.19209e-08	-0.0001564	-0.006	1.19209e-08	-0.0003128	-1.49012e-09	-0.001	-7.82e-05	-0.008	1.19209e-08	-7.82e-05	-0.006	0.004
-0.000156	-0.006	0.004	-0.000248	-0.008	0.004	-0.000156	-0.012	-0.002	-7.8e-05	-0.008	0.004	-0.000156	-0.006	1.19209e-08	-0.000312	0.002	-0.001	-7.8e-05	-0.01	0.004	-7.8e-05	-0.006	0.004
-0.0001556	-0.006	0.004	-0.0002472	-0.006	0.004	-0.0001556	-0.012	-0.002	-7.78e-05	-0.006	1.19209e-08	-0.0001556	-0.006	1.19209e-08	-0.0003112	-1.49012e-09	-0.001	-7.78e-05	-0.008	0.004	-7.78e-05	-0.008	0.002
-0.0001552	-0.006	0.004	-0.0002464	-0.008	0.002	-0.0001552	-0.008	0.002	-7.76e-05	-0.008	0.004	-0.0001552	-0.006	1.19209e-08	-0.0003104	0.002	-0.001	-7.76e-05	-0.006	0.004	-7.76e-05	-0.004	0.002
-0.0001548	-0.004	0.004	-0.0002456	-0.006	0.004	-0.0001548	-0.004	-0.002	-7.74e-05	-0.004	0.004	-0.0001548	-0.006	1.19209e-08	-0.0003096	-1.49012e-09	-0.001	-7.74e-05	-0.006	-0.004	-7.74e-05	-0.004	0.002
-0.0001544	-0.008	0.004	-0.0002448	-0.004	5.96047e-09	-0.0001544	-0.012	0.002	-7.72e-05	-0.004	0.004	-0.0001544	-0.008	1.19209e-08	-0.0003088	-0.002	-0.001	-7.72e-05	-0.006	1.19209e-08	-7.72e-05	-0.004	0.004
-0.000154	-0.006	0.002	-0.000244	-0.006	0.006	-0.000154	-2.98023e-09	0.002	-7.7e-05	-0.004	1.19209e-08	-0.000154	-0.006	1.19209e-08	-0.000308	0.004	-0.005	-7.7e-05	-0.008	-0.004	-7.7e-05	-0.006	0.006
-0.0001536	-0.004	0.004	-0.0002432	-0.004	0.002	-0.0001536	-0.004	0.002	-7.68e-05	-0.006	-0.004	-0.0001536	-0.004	1.19209e-08	-0.0003072	-1.49012e-09	-0.001	-7.68e-05	-0.006	1.19209e-08	-7.68e-05	-0.008	0.006
-0.0001532	-0.008	0.004	-0.0002424	-0.004	0.004	-0.0001532	-0.012	-0.002	-7.66e-05	-0.006	0.004	-0.0001532	-0.006	1.19209e-08	-0.0003064	-0.002	0.000999995	-7.66e-05	-0.006	1.19209e-08	-7.66e-05	-0.008	0.006
-0.0001528	-0.006	0.004	-0.0002416	-0.008	0.002	-0.0001528	-0.008	0.002	-7.64e-05	-0.006	0.004	-0.0001528	-0.008	1.19209e-08	-0.0003056	0.002	-0.003	-7.64e-05	-0.006	1.19209e-08	-7.64e-05	-0.008	0.006
-0.0001524	-0.006	0.002	-0.0002408	-0.008	0.002	-0.0001524	-0.008	-0.002	-7.62e-05	-0.008	1.19209e-08	-0.0001524	-0.006	1.19209e-08	-0.0003048	-0.004	-0.001	-7.62e-05	-0.004	1.19209e-08	-7.62e-05	-0.01	0.004
-0.000152	-0.004	0.004	-0.00024	-0.006	5.96047e-09	-0.000152	-0.004	0.002	-7.6e-05	-0.004	1.19209e-08	-0.000152	-0.006	1.19209e-08	-0.000304	-1.49012e-09	-0.001	-7.6e-05	-0.004	1.19209e-08	-7.6e-05	-0.006	0.004
-0.0001516	-0.008	0.004	-0.0002392	-0.008	0.002	-0.0001516	-0.012	0.002	-7.58e-05	-0.006	1.19209e-08	-0.0001516	-0.004	1.19209e-08	-0.0003032	-1.49012e-09	0.000999995	-7.58e-05	-0.006	1.19209e-08	-7.58e-05	-0.004	0.004
-0.0001512	-0.006	0.002	-0.0002384	-0.006	0.004	-0.0001512	-0.008	-0.002	-7.56e-05	-0.006	1.19209e-08	-0.0001512	-0.006	1.19209e-08	-0.0003024	-0.002	-0.001	-7.56e-05	-0.006	1.19209e-08	-7.56e-05	-0.004	0.004
-0.0001508	-0.004	0.004	-0.0002376	-0.006	0.002	-0.0001508	-0.004	-0.002	-7.54e-05	-0.008	1.19209e-08	-0.0001508	-0.006	1.19209e-08	-0.0003016	-1.49012e-09	-0.001	-7.54e-05	-0.008	0.004	-7.54e-05	-0.006	0.004
-0.0001504	-0.008	0.002	-0.0002368	-0.006	0.002	-0.0001504	-0.012	-0.002	-7.52e-05	-0.006	1.19209e-08	-0.0001504	-0.006	0.004	-0.0003008	0.002	-0.001	-7.52e-05	-0.006	1.19209e-08	-7.52e-05	-0.006	0.006
-0.00015	-0.006	0.004	-0.000236	-0.008	0.002	-0.00015	-0.008	0.002	-7.5e-05	-0.008	1.19209e-08	-0.00015	-0.006	1.19209e-08	-0.0003	0.002	-0.001	-7.5e-05	-0.006	1.19209e-08	-7.5e-05	-0.004	0.002
-0.0001496	-0.004	0.004	-0.0002352	-0.008	0.002	-0.0001496	-0.008	0.002	-7.48e-05	-0.008	1.19209e-08	-0.0001496	-0.008	1.19209e-08	-0.0002992	-0.002	-0.005	-7.48e-05	-0.004	0.004	-7.48e-05	-0.004	0.004
-0.0001492	-0.006	0.004	-0.0002344	-0.006	0.002	-0.0001492	-0.004	0.002	-7.46e-05	-0.01	0.004	-0.0001492	-0.006	-0.004	-0.0002984	-0.004	-0.001	-7.46e-05	-0.006	1.19209e-08	-7.46e-05	-0.008	0.004
-0.0001488	-0.008	0.004	-0.0002336	-0.006	0.004	-0.0001488	-0.008	0.002	-7.44e-05	-0.006	0.008	-0.0001488	-0.006	-0.004	-0.0002976	0.002	-0.003	-7.44e-05	-0.008	-0.004	-7.44e-05	-0.008	0.004
-0.0001484	-0.008	0.008	-0.0002328	-0.01	0.002	-0.0001484	-0.008	0.002	-7.42e-05	-0.006	1.19209e-08	-0.0001484	-0.008	-0.004	-0.0002968	-0.002	-0.005	-7.42e-05	-0.004	1.19209e-08	-7.42e-05	-0.01	0.006
-0.000148	-0.008	0.004	-0.000232	-0.008	0.006	-0.000148	-0.004	-0.002	-7.4e-05	-0.006	0.004	-0.000148	-0.006	1.19209e-08	-0.000296	0.002	-0.005	-7.4e-05	-0.006	1.19209e-08	-7.4e-05	-0.01	0.006
-0.0001476	-0.004	0.002	-0.0002312	-0.006	0.004	-0.0001476	-0.012	0.002	-7.38e-05	-0.006	0.004	-0.0001476	-0.006	1.19209e-08	-0.0002952	-1.49012e-09	-0.007	-7.38e-05	-0.006	1.19209e-08	-7.38e-05	-0.006	0.004
-0.0001472	-0.002	0.002	-0.0002304	-0.006	0.002	-0.0001472	-0.004	0.002	-7.36e-05	-0.006	1.19209e-08	-0.0001472	-0.008	1.19209e-08	-0.0002944	-0.002	-0.003	-7.36e-05	-0.004	0.004	-7.36e-05	-0.004	0.004
-0.0001468	-0.008	0.006	-0.0002296	-0.008	0.004	-0.0001468	-0.004	-0.002	-7.34e-05	-0.008	-0.004	-0.0001468	-0.006	0.004	-0.0002936	-1.49012e-09	-0.003	-7.34e-05	-0.004	1.19209e-08	-7.34e-05	-0.002	0.006
-0.0001464	-0.01	0.004	-0.0002288	-0.008	0.004	-0.0001464	-0.004	-0.002	-7.32e-05	-0.008	1.19209e-08	-0.0001464	-0.006	-0.004	-0.0002928	-0.004	-0.003	-7.32e-05	-0.004	-0.004	-7.32e-05	-0.004	0.004
-0.000146	-0.006	0.004	-0.000228	-0.004	0.002	-0.000146	-0.004	-0.002	-7.3e-05	-0.006	0.004	-0.000146	-0.006	-0.004	-0.000292	-1.49012e-09	-0.005	-7.3e-05	-0.004	1.19209e-08	-7.3e-05	-0.006	0.004
-0.0001456	-0.006	0.004	-0.0002272	-0.008	0.004	-0.0001456	-0.008	0.002	-7.28e-05	-0.006	1.19209e-08	-0.0001456	-0.008	1.19209e-08	-0.0002912	-0.002	0.000999995	-7.28e-05	-0.006	0.008	-7.28e-05	-0.01	0.006
-0.0001452	-0.008	0.004	-0.0002264	-0.006	0.002	-0.0001452	-0.004	0.002	-7.26e-05	-0.008	-0.004	-0.0001452	-0.006	1.19209e-08	-0.0002904	-1.49012e-09	-0.003	-7.26e-05	-0.006	0.004	-7.26e-05	-0.008	0.004
-0.0001448	-0.006	0.004	-0.0002256	-0.006	0.002	-0.0001448	-0.008	-0.006	-7.24e-05	-0.004	1.19209e-08	-0.0001448	-0.006	0.004	-0.0002896	-1.49012e-09	-0.003	-7.24e-05	-0.006	1.19209e-08	-7.24e-05	-0.008	0.004
-0.0001444	-0.006	0.006	-0.0002248	-0.006	0.004	-0.0001444	-0.008	-0.002	-7.22e-05	-0.006	1.19209e-08	-0.0001444	-0.008	1.19209e-08	-0.0002888	-1.49012e-09	-0.001	-7.22e-05	-0.006	-0.004	-7.22e-05	-0.006	0.004
-0.000144	-0.008	0.004	-0.000224	-0.006	0.002	-0.000144	-0.004	-0.01	-7.2e-05	-0.008	-0.004	-0.000144	-0.006	1.19209e-08	-0.000288	-0.002	-0.001	-7.2e-05	-0.006	0.004	-7.2e-05	-0.006	0.004
-0.0001436	-0.008	0.004	-0.0002232	-0.008	0.002	-0.0001436	-0.012	-0.006	-7.18e-05	-0.008	0.004	-0.0001436	-0.008	-0.004	-0.0002872	-1.49012e-09	-0.003	-7.18e-05	-0.004	1.19209e-08	-7.18e-05	-0.006	0.004
-0.0001432	-0.006	0.004	-0.0002224	-0.004	0.002	-0.0001432	-0.004	0.002	-7.16e-05	-0.008	1.19209e-08	-0.0001432	-0.01	0.004	-0.0002864	-1.49012e-09	-0.001	-7.16e-05	-0.006	1.19209e-08	-7.16e-05	-0.006	0.006
-0.0001428	-0.006	0.006	-0.0002216	-0.01	0.004	-0.0001428	-0.004	0.002	-7.14e-05	-0.006	1.19209e-08	-0.0001428	-0.008	0.004	-0.0002856	-0.002	-0.001	-7.14e-05	-0.004	1.19209e-08	-7.14e-05	-0.006	0.004
-0.0001424	-0.006	5.96047e-09	-0.0002208	-0.006	0.002	-0.0001424	-0.008	-0.002	-7.12e-05	-0.008	1.19209e-08	-0.0001424	-0.008	1.19209e-08	-0.0002848	-0.002	-0.001	-7.12e-05	-0.004	1.19209e-08	-7.12e-05	-0.008	0.002
-0.000142	-0.006	0.004	-0.00022	-0.006	0.006	-0.000142	-0.008	0.002	-7.1e-05	-0.006	1.19209e-08	-0.000142	-0.006	1.19209e-08	-0.000284	-1.49012e-09	-0.001	-7.1e-05	-0.004	0.004	-7.1e-05	-0.006	0.004
-0.0001416	-0.01	0.004	-0.0002192	-0.008	0.004	-0.0001416	-0.004	0.002	-7.08e-05	-0.008	1.19209e-08	-0.0001416	-0.008	-0.004	-0.0002832	-0.004	-0.001	-7.08e-05	-0.006	-0.004	-7.08e-05	-0.006	0.004
-0.0001412	-0.008	0.004	-0.0002184	-0.008	0.002	-0.0001412	-0.008	-0.002	-7.06e-05	-0.008	0.004	-0.0001412	-0.006	1.19209e-08	-0.0002824	-0.002	-0.003	-7.06e-05	-0.006	1.19209e-08	-7.06e-05	-0.01	0.004
-0.0001408	-0.004	0.006	-0.0002176	-0.008	0.004	-0.0001408	-0.004	-0.002	-7.04e-05	-0.008	-0.004	-0.0001408	-0.008	1.19209e-08	-0.0002816	-0.002	-0.001	-7.04e-05	-0.008	0.004	-7.04e-05	-0.006	0.004
-0.0001404	-0.006	0.004	-0.0002168	-0.006	0.002	-0.0001404	-0.012	0.002	-7.02e-05	-0.006	1.19209e-08	-0.0001404	-0.004	0.008	-0.0002808	-1.49012e-09	-0.001	-7.02e-05	-0.006	0.004	-7.02e-05	-0.006	0.002
-0.00014	-0.01	5.96047e-09	-0.000216	-0.004	0.002	-0.00014	-0.004	0.002	-7e-05	-0.006	1.19209e-08	-0.00014	-0.006	-0.004	-0.00028	-1.49012e-09	-0.001	-7e-05	-0.01	-0.004	-7e-05	-0.006	0.004
-0.0001396	-0.006	5.96047e-09	-0.0002152	-0.008	0.004	-0.0001396	-0.004	-0.002	-6.98e-05	-0.006	1.19209e-08	-0.0001396	-0.008	1.19209e-08	-0.0002792	-1.49012e-09	-0.001	-6.98e-05	-0.006	0.004	-6.98e-05	-0.008	0.004
-0.0001392	-0.006	0.004	-0.0002144	-0.008	0.004	-0.0001392	-0.004	-0.002	-6.96e-05	-0.008	1.19209e-08	-0.0001392	-0.01	-0.004	-0.0002784	-0.002	-0.001	-6.96e-05	-0.006	0.004	-6.96e-05	-0.006	0.004
-0.0001388	-0.004	0.004	-0.0002136	-0.008	0.004	-0.0001388	-0.008	0.002	-6.94e-05	-0.008	1.19209e-08	-0.0001388	-0.008	1.19209e-08	-0.0002776	-1.49012e-09	-0.001	-6.94e-05	-0.006	0.004	-6.94e-05	-0.006	0.004
-0.0001384	-0.004	0.006	-0.0002128	-0.008	0.004	-0.0001384	-0.008	-0.002	-6.92e-05	-0.006	1.19209e-08	-0.0001384	-0.01	1.19209e-08	-0.0002768	-0.002	-0.001	-6.92e-05	-0.004	1.19209e-08	-6.92e-05	-0.006	0.004
-0.000138	-0.006	0.004	-0.000212	-0.004	0.002	-0.000138	-0.008	0.006	-6.9e-05	-0.006	1.19209e-08	-0.000138	-0.006	1.19209e-08	-0.000276	-0.002	-0.003	-6.9e-05	-0.004	-0.004	-6.9e-05	-0.006	0.004
-0.0001376	-0.006	0.002	-0.0002112	-0.006	5.96047e-09	-0.0001376	-0.004	-0.002	-6.88e-05	-0.008	1.19209e-08	-0.0001376	-0.006	1.19209e-08	-0.0002752	-0.002	0.000999995	-6.88e-05	-0.006	0.004	-6.88e-05	-0.006	0.004
-0.0001372	-0.006	0.006	-0.0002104	-0.008	0.002	-0.0001372	-0.008	-0.002	-6.86e-05	-0.008	1.19209e-08	-0.0001372	-0.008	1.19209e-08	-0.0002744	-0.002	-0.003	-6.86e-05	-0.006	0.004	-6.86e-05	-0.002	0.002
-0.0001368	-0.008	0.004	-0.0002096	-0.006	0.002	-0.0001368	-0.004	0.006	-6.84e-05	-0.008	1.19209e-08	-0.0001368	-0.008	1.19209e-08	-0.0002736	-0.004	-0.001	-6.84e-05	-0.006	1.19209e-08	-6.84e-05	-0.004	0.002
-0.0001364	-0.008	0.004	-0.0002088	-0.008	0.006	-0.0001364	-0.008	0.002	-6.82e-05	-0.008	-0.004	-0.0001364	-0.008	0.004	-0.0002728	0.002	-0.003	-6.82e-05	-0.006	0.004	-6.82e-05	-0.004	0.004
-0.000136	-0.008	0.002	-0.000208	-0.008	0.002	-0.000136	-2.98023e-09	0.002	-6.8e-05	-0.006	1.19209e-08	-0.000136	-0.01	0.004	-0.000272	-1.49012e-09	-0.003	-6.8e-05	-0.006	-0.004	-6.8e-05	-0.004	0.004
-0.0001356	-0.006	0.004	-0.0002072	-0.006	0.002	-0.0001356	-0.008	-0.002	-6.78e-05	-0.008	1.19209e-08	-0.0001356	-0.004	1.19209e-08	-0.0002712	-1.49012e-09	0.000999995	-6.78e-05	-0.004	-0.004	-6.78e-05	-0.008	0.004
-0.0001352	-0.006	0.004	-0.0002064	-0.004	0.002	-0.0001352	-0.004	0.01	-6.76e-05	-0.006	1.19209e-08	-0.0001352	-0.006	1.19209e-08	-0.0002704	-1.49012e-09	-0.005	-6.76e-05	-0.006	1.19209e-08	-6.76e-05	-0.008	0.002
-0.0001348	-0.008	0.004	-0.0002056	-0.006	0.004	-0.0001348	-0.012	0.002	-6.74e-05	-0.006	0.004	-0.0001348	-0.006	1.19209e-08	-0.0002696	-1.49012e-09	0.000999995	-6.74e-05	-0.006	1.19209e-08	-6.74e-05	-0.006	5.96047e-09
-0.0001344	-0.006	0.004	-0.0002048	-0.008	5.96047e-09	-0.0001344	-0.008	-0.002	-6.72e-05	-0.008	1.19209e-08	-0.0001344	-0.008	1.19209e-08	-0.0002688	-0.002	0.000999995	-6.72e-05	-0.006	1.19209e-08	-6.72e-05	-0.006	0.004
-0.000134	-0.008	0.004	-0.000204	-0.008	0.002	-0.000134	-0.004	0.002	-6.7e-05	-0.006	1.19209e-08	-0.000134	-0.008	1.19209e-08	-0.000268	-1.49012e-09	-0.003	-6.7e-05	-0.008	0.004	-6.7e-05	-0.004	0.004
-0.0001336	-0.006	0.006	-0.0002032	-0.008	0.002	-0.0001336	-0.008	0.002	-6.68e-05	-0.006	1.19209e-08	-0.0001336	-0.006	1.19209e-08	-0.0002672	-0.004	-0.001	-6.68e-05	-0.004	0.004	-6.68e-05	-0.008	0.006
-0.0001332	-0.002	0.004	-0.0002024	-0.006	0.004	-0.0001332	-0.008	0.006	-6.66e-05	-0.006	1.19209e-08	-0.0001332	-0.006	1.19209e-08	-0.0002664	0.002	-0.001	-6.66e-05	-0.004	1.19209e-08	-6.66e-05	-0.006	0.004
-0.0001328	-0.006	0.004	-0.0002016	-0.006	0.004	-0.0001328	-0.008	0.002	-6.64e-05	-0.01	1.19209e-08	-0.0001328	-0.006	-0.004	-0.0002656	-1.49012e-09	-0.003	-6.64e-05	-0.006	1.19209e-08	-6.64e-05	-0.008	0.004
-0.0001324	-0.012	0.004	-0.0002008	-0.008	0.004	-0.0001324	-0.008	-0.002	-6.62e-05	-0.008	1.19209e-08	-0.0001324	-0.006	-0.004	-0.0002648	-0.002	-0.001	-6.62e-05	-0.006	1.19209e-08	-6.62e-05	-0.006	0.004
-0.000132	-0.006	0.002	-0.0002	-0.006	5.96047e-09	-0.000132	-0.008	0.002	-6.6e-05	-0.008	1.19209e-08	-0.000132	-0.008	1.19209e-08	-0.000264	-1.49012e-09	-0.001	-6.6e-05	-0.006	0.004	-6.6e-05	-0.006	0.004
-0.0001316	-0.002	0.002	-0.0001992	-0.004	0.002	-0.0001316	-0.008	-0.002	-6.58e-05	-0.006	1.19209e-08	-0.0001316	-0.006	1.19209e-08	-0.0002632	-0.004	-0.003	-6.58e-05	-0.006	0.004	-6.58e-05	-0.004	0.004
-0.0001312	-0.008	0.006	-0.0001984	-0.008	0.004	-0.0001312	-0.004	-0.006	-6.56e-05	-0.006	1.19209e-08	-0.0001312	-0.004	1.19209e-08	-0.0002624	0.004	-0.001	-6.56e-05	-0.006	0.004	-6.56e-05	-0.006	0.004
-0.0001308	-0.012	0.002	-0.0001976	-0.006	5.96047e-09	-0.0001308	-0.008	-0.002	-6.54e-05	-0.008	-0.004	-0.0001308	-0.006	1.19209e-08	-0.0002616	-0.002	-0.001	-6.54e-05	-0.006	1.19209e-08	-6.54e-05	-0.008	0.002
-0.0001304	-0.008	0.004	-0.0001968	-0.006	0.002	-0.0001304	-0.004	-0.002	-6.52e-05	-0.006	1.19209e-08	-0.0001304	-0.006	-0.004	-0.0002608	-0.002	-0.001	-6.52e-05	-0.004	-0.004	-6.52e-05	-0.006	0.004
-0.00013	-0.006	0.004	-0.000196	-0.006	0.004	-0.00013	-0.004	-0.006	-6.5e-05	-0.006	-0.004	-0.00013	-0.008	1.19209e-08	-0.00026	-1.49012e-09	0.000999995	-6.5e-05	-0.004	-0.004	-6.5e-05	-0.008	0.004
-0.0001296	-0.004	0.002	-0.0001952	-0.004	5.96047e-09	-0.0001296	-0.012	0.002	-6.48e-05	-0.006	1.19209e-08	-0.0001296	-0.006	1.19209e-08	-0.0002592	-0.002	-0.001	-6.48e-05	-0.006	-0.004	-6.48e-05	-0.004	0.004
-0.0001292	-0.004	0.002	-0.0001944	-0.006	0.004	-0.0001292	-0.004	-0.006	-6.46e-05	-0.008	0.004	-0.0001292	-0.006	1.19209e-08	-0.0002584	-1.49012e-09	-0.001	-6.46e-05	-0.004	1.19209e-08	-6.46e-05	-0.004	0.004
-0.0001288	-0.008	0.004	-0.0001936	-0.006	0.004	-0.0001288	-0.004	-0.002	-6.44e-05	-0.006	0.004	-0.0001288	-0.004	0.004	-0.0002576	0.002	-0.001	-6.44e-05	-0.01	0.004	-6.44e-05	-0.004	0.004
-0.0001284	-0.006	0.004	-0.0001928	-0.008	0.002	-0.0001284	-0.004	0.002	-6.42e-05	-0.006	1.19209e-08	-0.0001284	-0.006	1.19209e-08	-0.0002568	-1.49012e-09	-0.001	-6.42e-05	-0.004	1.19209e-08	-6.42e-05	-0.006	0.004
-0.000128	-0.006	0.006	-0.000192	-0.008	0.004	-0.000128	-0.008	-0.002	-6.4e-05	-0.008	1.19209e-08	-0.000128	-0.006	0.004	-0.000256	0.002	-0.001	-6.4e-05	-0.004	1.19209e-08	-6.4e-05	-0.006	0.004
-0.0001276	-0.006	0.004	-0.0001912	-0.006	0.002	-0.0001276	-0.008	0.002	-6.38e-05	-0.006	1.19209e-08	-0.0001276	-0.006	-0.004	-0.0002552	0.004	-0.005	-6.38e-05	-0.004	1.19209e-08	-6.38e-05	-0.008	0.006
-0.0001272	-0.006	0.004	-0.0001904	-0.008	0.002	-0.0001272	-0.008	0.006	-6.36e-05	-0.008	0.004	-0.0001272	-0.006	1.19209e-08	-0.0002544	-0.004	-0.001	-6.36e-05	-0.006	0.004	-6.36e-05	-0.006	0.004
-0.0001268	-0.008	0.002	-0.0001896	-0.006	0.004	-0.0001268	-0.008	-0.002	-6.34e-05	-0.008	1.19209e-08	-0.0001268	-0.008	1.19209e-08	-0.0002536	0.002	-0.001	-6.34e-05	-0.006	-0.004	-6.34e-05	-0.004	0.004
-0.0001264	-0.004	0.004	-0.0001888	-0.008	0.004	-0.0001264	-0.012	-0.002	-6.32e-05	-0.008	-0.004	-0.0001264	-0.006	0.004	-0.0002528	-0.002	-0.001	-6.32e-05	-0.006	-0.004	-6.32e-05	-0.006	0.002
-0.000126	-0.006	0.004	-0.000188	-0.008	0.004	-0.000126	-0.008	-0.002	-6.3e-05	-0.006	1.19209e-08	-0.000126	-0.006	0.004	-0.000252	-0.004	0.000999995	-6.3e-05	-0.004	1.19209e-08	-6.3e-05	-0.006	0.002
-0.0001256	-0.008	0.004	-0.0001872	-0.006	0.002	-0.0001256	-0.012	0.002	-6.28e-05	-0.004	1.19209e-08	-0.0001256	-0.008	1.19209e-08	-0.0002512	-0.002	-0.001	-6.28e-05	-0.004	0.004	-6.28e-05	-0.008	0.004
-0.0001252	-0.006	0.004	-0.0001864	-0.006	0.002	-0.0001252	-0.004	-0.002	-6.26e-05	-0.004	0.004	-0.0001252	-0.006	-0.004	-0.0002504	-1.49012e-09	-0.003	-6.26e-05	-0.006	1.19209e-08	-6.26e-05	-0.004	0.004
-0.0001248	-0.006	0.004	-0.0001856	-0.006	0.002	-0.0001248	-2.98023e-09	0.002	-6.24e-05	-0.006	0.004	-0.0001248	-0.006	-0.004	-0.0002496	0.002	-0.001	-6.24e-05	-0.006	1.19209e-08	-6.24e-05	-0.006	0.002
-0.0001244	-0.004	5.96047e-09	-0.0001848	-0.008	0.002	-0.0001244	-0.008	-0.002	-6.22e-05	-0.006	1.19209e-08	-0.0001244	-0.006	1.19209e-08	-0.0002488	0.002	-0.001	-6.22e-05	-0.006	0.004	-6.22e-05	-0.004	0.004
-0.000124	-0.004	0.002	-0.000184	-0.006	0.002	-0.000124	-2.98023e-09	-0.002	-6.2e-05	-0.004	1.19209e-08	-0.000124	-0.008	-0.004	-0.000248	-0.002	-0.001	-6.2e-05	-0.006	0.004	-6.2e-05	-0.006	0.006
-0.0001236	-0.008	0.006	-0.0001832	-0.006	5.96047e-09	-0.0001236	-0.008	-0.002	-6.18e-05	-0.006	1.19209e-08	-0.0001236	-0.008	1.19209e-08	-0.0002472	0.002	-0.001	-6.18e-05	-0.006	0.008	-6.18e-05	-0.006	0.004
-0.0001232	-0.006	0.004	-0.0001824	-0.004	0.004	-0.0001232	-0.008	-0.002	-6.16e-05	-0.004	1.19209e-08	-0.0001232	-0.008	0.008	-0.0002464	-0.002	-0.001	-6.16e-05	-0.004	-0.004	-6.16e-05	-0.006	0.004
-0.0001228	-0.004	0.004	-0.0001816	-0.006	0.004	-0.0001228	-0.008	0.002	-6.14e-05	-0.004	-0.004	-0.0001228	-0.008	1.19209e-08	-0.0002456	-1.49012e-09	-0.001	-6.14e-05	-0.004	1.19209e-08	-6.14e-05	-0.006	0.004
-0.0001224	-0.006	0.002	-0.0001808	-0.008	0.004	-0.0001224	-0.004	-0.002	-6.12e-05	-0.004	1.19209e-08	-0.0001224	-0.004	1.19209e-08	-0.0002448	0.002	-0.001	-6.12e-05	-0.006	1.19209e-08	-6.12e-05	-0.006	0.002
-0.000122	-0.008	0.004	-0.00018	-0.004	0.004	-0.000122	-0.008	0.002	-6.1e-05	-0.006	-0.004	-0.000122	-0.008	1.19209e-08	-0.000244	-1.49012e-09	-0.003	-6.1e-05	-0.008	0.004	-6.1e-05	-0.004	0.002
-0.0001216	-0.006	0.006	-0.0001792	-0.004	0.004	-0.0001216	-0.008	-0.002	-6.08e-05	-0.006	1.19209e-08	-0.0001216	-0.008	1.19209e-08	-0.0002432	-1.49012e-09	0.003	-6.08e-05	-0.008	0.008	-6.08e-05	-0.004	0.004
-0.0001212	-0.008	0.006	-0.0001784	-0.008	0.004	-0.0001212	-0.008	-0.002	-6.06e-05	-0.008	-0.008	-0.0001212	-0.01	0.004	-0.0002424	0.002	-0.001	-6.06e-05	-0.008	1.19209e-08	-6.06e-05	-0.006	0.004
-0.0001208	-0.008	0.004	-0.0001776	-0.008	0.006	-0.0001208	-2.98023e-09	0.006	-6.04e-05	-0.008	1.19209e-08	-0.0001208	-0.006	1.19209e-08	-0.0002416	-1.49012e-09	0.000999995	-6.04e-05	-0.006	0.004	-6.04e-05	-0.008	0.002
-0.0001204	-0.006	0.002	-0.0001768	-0.01	0.004	-0.0001204	-0.008	-0.002	-6.02e-05	-0.008	1.19209e-08	-0.0001204	-0.006	0.004	-0.0002408	0.002	0.000999995	-6.02e-05	-0.006	0.004	-6.02e-05	-0.008	0.004
-0.00012	-0.004	0.004	-0.000176	-0.006	0.002	-0.00012	-0.008	-0.002	-6e-05	-0.004	1.19209e-08	-0.00012	-0.006	1.19209e-08	-0.00024	0.002	-0.001	-6e-05	-0.006	1.19209e-08	-6e-05	-0.006	0.004
-0.0001196	-0.006	0.004	-0.0001752	-0.006	0.004	-0.0001196	-0.012	-0.002	-5.98e-05	-0.008	-0.008	-0.0001196	-0.004	1.19209e-08	-0.0002392	-0.002	-0.001	-5.98e-05	-0.006	1.19209e-08	-5.98e-05	-0.006	0.002
-0.0001192	-0.006	0.004	-0.0001744	-0.01	0.002	-0.0001192	-0.004	0.006	-5.96e-05	-0.006	1.19209e-08	-0.0001192	-0.008	1.19209e-08	-0.0002384	-1.49012e-09	-0.001	-5.96e-05	-0.006	1.19209e-08	-5.96e-05	-0.002	0.002
-0.0001188	-0.006	0.002	-0.0001736	-0.008	0.004	-0.0001188	-2.98023e-09	-0.002	-5.94e-05	-0.004	-0.004	-0.0001188	-0.01	0.004	-0.0002376	-1.49012e-09	-0.001	-5.94e-05	-0.008	1.19209e-08	-5.94e-05	-0.004	0.006
-0.0001184	-0.006	0.004	-0.0001728	-0.006	0.002	-0.0001184	-0.008	0.006	-5.92e-05	-0.006	1.19209e-08	-0.0001184	-0.008	0.008	-0.0002368	-1.49012e-09	-0.003	-5.92e-05	-0.008	0.004	-5.92e-05	-0.006	0.004
-0.000118	-0.006	0.004	-0.000172	-0.008	0.002	-0.000118	-0.008	-0.002	-5.9e-05	-0.006	1.19209e-08	-0.000118	-0.006	0.004	-0.000236	-0.004	-0.001	-5.9e-05	-0.006	-0.004	-5.9e-05	-0.006	0.002
-0.0001176	-0.006	0.004	-0.0001712	-0.006	0.002	-0.0001176	-0.008	0.002	-5.88e-05	-0.006	-0.004	-0.0001176	-0.008	-0.004	-0.0002352	0.002	-0.001	-5.88e-05	-0.008	0.004	-5.88e-05	-0.006	0.002
-0.0001172	-0.004	0.004	-0.0001704	-0.004	0.004	-0.0001172	-0.004	0.002	-5.86e-05	-0.006	1.19209e-08	-0.0001172	-0.008	-0.004	-0.0002344	-0.002	-0.001	-5.86e-05	-0.008	1.19209e-08	-5.86e-05	-0.006	0.004
-0.0001168	-0.006	0.004	-0.0001696	-0.004	0.002	-0.0001168	-0.004	0.002	-5.84e-05	-0.004	1.19209e-08	-0.0001168	-0.006	1.19209e-08	-0.0002336	-1.49012e-09	0.000999995	-5.84e-05	-0.008	0.004	-5.84e-05	-0.006	0.004
-0.0001164	-0.006	0.004	-0.0001688	-0.004	0.002	-0.0001164	-0.004	-0.002	-5.82e-05	-0.006	1.19209e-08	-0.0001164	-0.006	0.004	-0.0002328	-1.49012e-09	0.000999995	-5.82e-05	-0.008	-0.004	-5.82e-05	-0.004	0.004
-0.000116	-0.006	0.004	-0.000168	-0.006	0.004	-0.000116	-0.004	0.002	-5.8e-05	-0.006	1.19209e-08	-0.000116	-0.006	1.19209e-08	-0.000232	-0.002	-0.003	-5.8e-05	-0.006	-0.004	-5.8e-05	-0.006	0.004
-0.0001156	-0.008	0.004	-0.0001672	-0.006	0.002	-0.0001156	-0.004	-0.006	-5.78e-05	-0.004	1.19209e-08	-0.0001156	-0.008	1.19209e-08	-0.0002312	0.002	-0.001	-5.78e-05	-0.008	1.19209e-08	-5.78e-05	-0.01	0.002
-0.0001152	-0.006	0.004	-0.0001664	-0.004	0.002	-0.0001152	-0.004	0.002	-5.76e-05	-0.008	-0.004	-0.0001152	-0.008	1.19209e-08	-0.0002304	-0.002	-0.001	-5.76e-05	-0.006	1.19209e-08	-5.76e-05	-0.008	0.004
-0.0001148	-0.006	0.006	-0.0001656	-0.004	5.96047e-09	-0.0001148	-0.004	0.002	-5.74e-05	-0.008	1.19209e-08	-0.0001148	-0.004	0.004	-0.0002296	-1.49012e-09	-0.001	-5.74e-05	-0.006	0.004	-5.74e-05	-0.004	0.004
-0.0001144	-0.006	0.004	-0.0001648	-0.008	0.004	-0.0001144	-0.004	-0.006	-5.72e-05	-0.006	-0.004	-0.0001144	-0.006	1.19209e-08	-0.0002288	-1.49012e-09	0.000999995	-5.72e-05	-0.006	-0.004	-5.72e-05	-0.004	0.004
-0.000114	-0.008	0.006	-0.000164	-0.002	0.002	-0.000114	-0.008	-0.002	-5.7e-05	-0.01	0.004	-0.000114	-0.008	1.19209e-08	-0.000228	-0.002	-0.003	-5.7e-05	-0.006	1.19209e-08	-5.7e-05	-0.002	0.004
-0.0001136	-0.006	0.002	-0.0001632	-0.006	0.002	-0.0001136	-2.98023e-09	0.006	-5.68e-05	-0.01	-0.004	-0.0001136	-0.004	1.19209e-08	-0.0002272	0.002	-0.001	-5.68e-05	-0.008	0.008	-5.68e-05	-0.004	0.004
-0.0001132	-0.004	0.004	-0.0001624	-0.006	0.004	-0.0001132	-0.004	0.002	-5.66e-05	-0.01	1.19209e-08	-0.0001132	-0.004	1.19209e-08	-0.0002264	-1.49012e-09	-0.003	-5.66e-05	-0.006	1.19209e-08	-5.66e-05	-0.008	0.004
-0.0001128	-0.008	0.002	-0.0001616	-0.004	5.96047e-09	-0.0001128	-0.004	-0.002	-5.64e-05	-0.01	-0.008	-0.0001128	-0.006	0.004	-0.0002256	-0.004	-0.001	-5.64e-05	-0.006	1.19209e-08	-5.64e-05	-0.008	0.006
-0.0001124	-0.008	0.004	-0.0001608	-0.006	5.96047e-09	-0.0001124	-0.012	0.002	-5.62e-05	-0.004	1.19209e-08	-0.0001124	-0.006	1.19209e-08	-0.0002248	-1.49012e-09	-0.001	-5.62e-05	-0.008	1.19209e-08	-5.62e-05	-0.01	0.006
-0.000112	-0.008	0.006	-0.00016	-0.004	5.96047e-09	-0.000112	-0.004	-0.006	-5.6e-05	-0.004	1.19209e-08	-0.000112	-0.006	-0.004	-0.000224	-1.49012e-09	-0.001	-5.6e-05	-0.006	1.19209e-08	-5.6e-05	-0.006	0.004
-0.0001116	-0.006	0.002	-0.0001592	-0.008	0.004	-0.0001116	-0.012	0.006	-5.58e-05	-0.004	0.004	-0.0001116	-0.008	1.19209e-08	-0.0002232	-0.002	-0.001	-5.58e-05	-0.008	1.19209e-08	-5.58e-05	-0.004	0.004
-0.0001112	-0.006	0.004	-0.0001584	-0.004	0.002	-0.0001112	-0.012	0.002	-5.56e-05	-0.004	0.004	-0.0001112	-0.008	1.19209e-08	-0.0002224	-1.49012e-09	-0.001	-5.56e-05	-0.004	0.004	-5.56e-05	-0.004	0.002
-0.0001108	-0.006	0.006	-0.0001576	-0.008	0.002	-0.0001108	-0.004	-0.006	-5.54e-05	-0.008	1.19209e-08	-0.0001108	-0.006	1.19209e-08	-0.0002216	-0.002	-0.001	-5.54e-05	-0.004	0.004	-5.54e-05	-0.006	0.002
-0.0001104	-0.008	0.004	-0.0001568	-0.006	0.004	-0.0001104	-0.004	0.006	-5.52e-05	-0.006	-0.004	-0.0001104	-0.008	1.19209e-08	-0.0002208	-0.002	-0.001	-5.52e-05	-0.004	-0.004	-5.52e-05	-0.004	0.006
-0.00011	-0.006	0.004	-0.000156	-0.008	0.002	-0.00011	-0.008	0.002	-5.5e-05	-0.006	0.004	-0.00011	-0.008	0.004	-0.00022	-1.49012e-09	-0.003	-5.5e-05	-0.006	-0.004	-5.5e-05	-0.006	0.006
-0.0001096	-0.004	0.004	-0.0001552	-0.01	0.004	-0.0001096	-0.008	-0.006	-5.48e-05	-0.006	-0.004	-0.0001096	-0.004	1.19209e-08	-0.0002192	0.002	-0.003	-5.48e-05	-0.004	-0.004	-5.48e-05	-0.008	0.004
-0.0001092	-0.006	0.004	-0.0001544	-0.008	0.004	-0.0001092	-0.004	-0.002	-5.46e-05	-0.006	1.19209e-08	-0.0001092	-0.004	0.004	-0.0002184	-0.002	0.000999995	-5.46e-05	-0.006	-0.004	-5.46e-05	-0.01	0.004
-0.0001088	-0.01	0.004	-0.0001536	-0.008	0.002	-0.0001088	-2.98023e-09	-0.002	-5.44e-05	-0.006	-0.008	-0.0001088	-0.008	1.19209e-08	-0.0002176	-1.49012e-09	-0.003	-5.44e-05	-0.008	0.004	-5.44e-05	-0.006	0.004
-0.0001084	-0.008	0.004	-0.0001528	-0.008	0.002	-0.0001084	-0.008	-0.002	-5.42e-05	-0.004	1.19209e-08	-0.0001084	-0.008	1.19209e-08	-0.0002168	-0.002	0.000999995	-5.42e-05	-0.008	-0.004	-5.42e-05	-0.004	0.002
-0.000108	-0.004	0.004	-0.000152	-0.006	0.002	-0.000108	-0.004	0.002	-5.4e-05	-0.006	0.004	-0.000108	-0.008	-0.004	-0.000216	-1.49012e-09	-0.001	-5.4e-05	-0.008	1.19209e-08	-5.4e-05	-0.006	0.004
-0.0001076	-0.002	0.004	-0.0001512	-0.008	0.004	-0.0001076	-0.004	0.006	-5.38e-05	-0.006	-0.004	-0.0001076	-0.006	1.19209e-08	-0.0002152	-0.004	-0.003	-5.38e-05	-0.006	1.19209e-08	-5.38e-05	-0.008	0.004
-0.0001072	-0.006	0.004	-0.0001504	-0.004	0.002	-0.0001072	-0.004	-0.002	-5.36e-05	-0.004	-0.004	-0.0001072	-0.002	1.19209e-08	-0.0002144	-0.004	0.000999995	-5.36e-05	-0.002	0.004	-5.36e-05	-0.008	0.004
-0.0001068	-0.01	0.004	-0.0001496	-0.006	0.002	-0.0001068	-2.98023e-09	-0.002	-5.34e-05	-0.006	1.19209e-08	-0.0001068	-0.006	1.19209e-08	-0.0002136	-0.002	-0.003	-5.34e-05	-0.004	1.19209e-08	-5.34e-05	-0.008	0.004
-0.0001064	-0.006	0.004	-0.0001488	-0.006	0.002	-0.0001064	-2.98023e-09	-0.006	-5.32e-05	-0.006	0.004	-0.0001064	-0.004	0.008	-0.0002128	-1.49012e-09	0.000999995	-5.32e-05	-0.004	-0.004	-5.32e-05	-0.004	0.002
-0.000106	-0.004	0.004	-0.000148	-0.008	0.004	-0.000106	-0.008	0.002	-5.3e-05	-0.006	0.004	-0.000106	-0.008	-0.004	-0.000212	-1.49012e-09	0.003	-5.3e-05	-0.006	0.004	-5.3e-05	-0.004	0.002
-0.0001056	-0.006	0.004	-0.0001472	-0.008	0.004	-0.0001056	-0.012	-0.002	-5.28e-05	-0.004	1.19209e-08	-0.0001056	-0.01	-0.004	-0.0002112	-1.49012e-09	-0.003	-5.28e-05	-0.004	0.004	-5.28e-05	-0.004	0.006
-0.0001052	-0.008	0.004	-0.0001464	-0.008	0.002	-0.0001052	-0.004	-0.002	-5.26e-05	-0.002	-0.004	-0.0001052	-0.008	1.19209e-08	-0.0002104	-0.002	-0.001	-5.26e-05	-0.004	1.19209e-08	-5.26e-05	-0.006	0.006
-0.0001048	-0.01	0.006	-0.0001456	-0.008	0.002	-0.0001048	0.004	-0.002	-5.24e-05	-0.002	1.19209e-08	-0.0001048	-0.004	1.19209e-08	-0.0002096	-1.49012e-09	-0.001	-5.24e-05	-0.002	-0.004	-5.24e-05	-0.006	0.002
-0.0001044	-0.006	0.004	-0.0001448	-0.006	0.002	-0.0001044	-0.008	-0.002	-5.22e-05	0.004	1.19209e-08	-0.0001044	-0.008	1.19209e-08	-0.0002088	-0.002	-0.003	-5.22e-05	0.004	1.19209e-08	-5.22e-05	-0.008	0.004
-0.000104	-0.006	0.004	-0.000144	-0.006	0.002	-0.000104	-0.008	-0.002	-5.2e-05	3.35276e-09	1.19209e-08	-0.000104	-0.008	0.004	-0.000208	-1.49012e-09	-0.001	-5.2e-05	0.002	1.19209e-08	-5.2e-05	-0.002	0.002
-0.0001036	-0.006	0.006	-0.0001432	-0.006	0.004	-0.0001036	-0.008	-0.006	-5.18e-05	0.002	0.004	-0.0001036	-0.008	1.19209e-08	-0.0002072	-1.49012e-09	-0.001	-5.18e-05	0.004	1.19209e-08	-5.18e-05	-0.002	0.004
-0.0001032	-0.008	0.004	-0.0001424	-0.006	0.002	-0.0001032	-0.012	0.002	-5.16e-05	0.002	1.19209e-08	-0.0001032	-0.006	-0.004	-0.0002064	-0.002	-0.001	-5.16e-05	0.006	-0.004	-5.16e-05	0.002	0.004
-0.0001028	-0.004	0.004	-0.0001416	-0.008	0.002	-0.0001028	-0.004	0.006	-5.14e-05	0.006	1.19209e-08	-0.0001028	-0.008	1.19209e-08	-0.0002056	-1.49012e-09	0.000999995	-5.14e-05	0.002	1.19209e-08	-5.14e-05	0.004	0.006
-0.0001024	-0.006	0.004	-0.0001408	-0.008	0.002	-0.0001024	-0.008	0.006	-5.12e-05	0.01	-0.004	-0.0001024	-0.008	1.19209e-08	-0.0002048	-0.002	-0.001	-5.12e-05	0.006	1.19209e-08	-5.12e-05	0.004	0.004
-0.000102	-0.01	0.006	-0.00014	-0.006	0.004	-0.000102	-2.98023e-09	-0.002	-5.1e-05	0.006	-0.004	-0.000102	-0.008	1.19209e-08	-0.000204	-0.002	-0.001	-5.1e-05	0.008	1.19209e-08	-5.1e-05	0.004	0.002
-0.0001016	-0.006	0.004	-0.0001392	-0.006	0.002	-0.0001016	-0.012	0.002	-5.08e-05	0.01	0.004	-0.0001016	-0.006	1.19209e-08	-0.0002032	-1.49012e-09	-0.001	-5.08e-05	0.01	0.004	-5.08e-05	0.006	0.002
-0.0001012	-0.008	0.004	-0.0001384	-0.006	0.004	-0.0001012	-2.98023e-09	-0.002	-5.06e-05	0.01	-0.004	-0.0001012	-0.008	1.19209e-08	-0.0002024	-0.002	-0.001	-5.06e-05	0.01	1.19209e-08	-5.06e-05	0.006	0.004
-0.0001008	-0.004	0.004	-0.0001376	-0.004	0.002	-0.0001008	-0.004	0.002	-5.04e-05	0.012	1.19209e-08	-0.0001008	-0.006	-0.004	-0.0002016	-1.49012e-09	-0.003	-5.04e-05	0.012	1.19209e-08	-5.04e-05	0.008	0.004
-0.0001004	-0.008	0.004	-0.0001368	-0.006	0.004	-0.0001004	-0.004	-0.002	-5.02e-05	0.014	0.004	-0.0001004	-0.008	1.19209e-08	-0.0002008	-0.002	-0.003	-5.02e-05	0.012	1.19209e-08	-5.02e-05	0.004	0.002
-0.0001	-0.008	0.004	-0.000136	-0.006	0.002	-0.0001	-0.008	0.002	-5e-05	0.016	1.19209e-08	-0.0001	-0.006	1.19209e-08	-0.0002	-0.002	-0.001	-5e-05	0.014	0.004	-5e-05	0.008	0.002
-9.96e-05	-0.008	0.006	-0.0001352	-0.006	0.004	-9.96e-05	-0.004	-0.002	-4.98e-05	0.016	1.19209e-08	-9.96e-05	-0.008	1.19209e-08	-0.0001992	-1.49012e-09	-0.001	-4.98e-05	0.016	-0.004	-4.98e-05	0.01	0.004
-9.92e-05	-0.006	0.004	-0.0001344	-0.006	0.002	-9.92e-05	-0.012	-0.002	-4.96e-05	0.016	1.19209e-08	-9.92e-05	-0.004	-0.004	-0.0001984	0.002	-0.001	-4.96e-05	0.014	-0.004	-4.96e-05	0.01	0.004
-9.88e-05	-0.006	0.004	-0.0001336	-0.006	0.002	-9.88e-05	-0.004	-0.002	-4.94e-05	0.014	1.19209e-08	-9.88e-05	-0.01	1.19209e-08	-0.0001976	-1.49012e-09	-0.001	-4.94e-05	0.018	-0.004	-4.94e-05	0.016	0.002
-9.84e-05	-0.002	0.002	-0.0001328	-0.004	5.96047e-09	-9.84e-05	-0.008	0.002	-4.92e-05	0.014	0.004	-9.84e-05	-0.008	0.004	-0.0001968	-0.002	-0.001	-4.92e-05	0.018	-0.004	-4.92e-05	0.016	0.004
-9.8e-05	-0.006	0.006	-0.000132	-0.004	5.96047e-09	-9.8e-05	-2.98023e-09	0.002	-4.9e-05	0.014	-0.004	-9.8e-05	-0.006	-0.004	-0.000196	-1.49012e-09	-0.001	-4.9e-05	0.018	-0.008	-4.9e-05	0.018	0.006
-9.76e-05	-0.01	0.004	-0.0001312	-0.006	0.002	-9.76e-05	-0.008	-0.002	-4.88e-05	0.016	-0.004	-9.76e-05	-0.008	1.19209e-08	-0.0001952	0.002	0.000999995	-4.88e-05	0.014	-0.004	-4.88e-05	0.014	0.004
-9.72e-05	-0.006	0.002	-0.0001304	-0.006	5.96047e-09	-9.72e-05	-0.008	-0.002	-4.86e-05	0.014	-0.008	-9.72e-05	-0.008	0.004	-0.0001944	-1.49012e-09	0.000999995	-4.86e-05	0.014	1.19209e-08	-4.86e-05	0.014	0.002
-9.68e-05	-0.004	0.002	-0.0001296	-0.008	0.004	-9.68e-05	-0.004	-0.002	-4.84e-05	0.016	1.19209e-08	-9.68e-05	-0.006	1.19209e-08	-0.0001936	-1.49012e-09	0.000999995	-4.84e-05	0.016	1.19209e-08	-4.84e-05	0.014	0.004
-9.64e-05	-0.006	0.002	-0.0001288	-0.006	0.002	-9.64e-05	-0.008	0.002	-4.82e-05	0.018	1.19209e-08	-9.64e-05	-0.008	-0.004	-0.0001928	-1.49012e-09	0.000999995	-4.82e-05	0.016	1.19209e-08	-4.82e-05	0.016	0.004
-9.6e-05	-0.002	0.004	-0.000128	-0.004	0.004	-9.6e-05	-0.008	0.002	-4.8e-05	0.016	0.004	-9.6e-05	-0.008	1.19209e-08	-0.000192	-1.49012e-09	-0.003	-4.8e-05	0.018	-0.004	-4.8e-05	0.016	0.002
-9.56e-05	-0.008	0.004	-0.0001272	-0.004	0.002	-9.56e-05	-0.008	0.002	-4.78e-05	0.016	1.19209e-08	-9.56e-05	-0.006	0.004	-0.0001912	0.002	-0.001	-4.78e-05	0.016	1.19209e-08	-4.78e-05	0.018	0.006
-9.52e-05	-0.01	0.004	-0.0001264	-0.004	0.004	-9.52e-05	-0.008	0.006	-4.76e-05	0.018	1.19209e-08	-9.52e-05	-0.006	0.004	-0.0001904	-0.002	-0.001	-4.76e-05	0.014	0.008	-4.76e-05	0.016	0.004
-9.48e-05	-0.004	0.006	-0.0001256	-0.008	0.002	-9.48e-05	-0.004	-0.002	-4.74e-05	0.018	1.19209e-08	-9.48e-05	-0.008	1.19209e-08	-0.0001896	-1.49012e-09	0.000999995	-4.74e-05	0.016	1.19209e-08	-4.74e-05	0.018	0.004
-9.44e-05	-0.004	0.004	-0.0001248	-0.006	5.96047e-09	-9.44e-05	-0.004	-0.002	-4.72e-05	0.016	-0.004	-9.44e-05	-0.008	1.19209e-08	-0.0001888	-1.49012e-09	-0.003	-4.72e-05	0.016	-0.004	-4.72e-05	0.018	0.002
-9.4e-05	-0.004	0.004	-0.000124	-0.008	0.004	-9.4e-05	-0.004	0.002	-4.7e-05	0.016	-0.004	-9.4e-05	-0.004	-0.004	-0.000188	-0.002	-0.001	-4.7e-05	0.018	-0.004	-4.7e-05	0.016	0.004
-9.36e-05	-0.006	0.004	-0.0001232	-0.006	0.002	-9.36e-05	-0.012	0.002	-4.68e-05	0.016	1.19209e-08	-9.36e-05	-0.004	1.19209e-08	-0.0001872	0.004	-0.003	-4.68e-05	0.014	1.19209e-08	-4.68e-05	0.016	0.004
-9.32e-05	-0.006	0.002	-0.0001224	-0.006	0.002	-9.32e-05	-0.008	-0.002	-4.66e-05	0.014	-0.004	-9.32e-05	-0.006	1.19209e-08	-0.0001864	-1.49012e-09	-0.001	-4.66e-05	0.014	1.19209e-08	-4.66e-05	0.018	0.004
-9.28e-05	-0.004	0.004	-0.0001216	-0.01	0.006	-9.28e-05	-0.004	0.002	-4.64e-05	0.014	0.004	-9.28e-05	-0.006	1.19209e-08	-0.0001856	-0.002	-0.001	-4.64e-05	0.016	0.004	-4.64e-05	0.018	0.004
-9.24e-05	-0.006	0.004	-0.0001208	-0.008	0.006	-9.24e-05	-0.004	0.002	-4.62e-05	0.016	1.19209e-08	-9.24e-05	-0.006	0.004	-0.0001848	-1.49012e-09	-0.001	-4.62e-05	0.018	1.19209e-08	-4.62e-05	0.018	0.004
-9.2e-05	-0.006	0.002	-0.00012	-0.006	0.002	-9.2e-05	-0.008	0.002	-4.6e-05	0.016	-0.004	-9.2e-05	-0.008	0.004	-0.000184	-0.002	-0.001	-4.6e-05	0.016	1.19209e-08	-4.6e-05	0.018	0.004
-9.16e-05	-0.006	0.004	-0.0001192	-0.006	0.002	-9.16e-05	-0.008	-0.002	-4.58e-05	0.014	-0.004	-9.16e-05	-0.006	1.19209e-08	-0.0001832	-0.002	0.000999995	-4.58e-05	0.016	0.004	-4.58e-05	0.02	0.002
-9.12e-05	-0.006	0.004	-0.0001184	-0.006	0.002	-9.12e-05	-0.004	0.006	-4.56e-05	0.018	-0.004	-9.12e-05	-0.008	1.19209e-08	-0.0001824	-1.49012e-09	-0.003	-4.56e-05	0.014	-0.004	-4.56e-05	0.02	0.006
-9.08e-05	-0.006	0.002	-0.0001176	-0.008	0.002	-9.08e-05	-0.012	-0.002	-4.54e-05	0.016	1.19209e-08	-9.08e-05	-0.006	0.004	-0.0001816	-0.002	-0.001	-4.54e-05	0.016	-0.004	-4.54e-05	0.016	0.006
-9.04e-05	-0.008	0.002	-0.0001168	-0.008	0.006	-9.04e-05	-0.004	0.002	-4.52e-05	0.016	-0.004	-9.04e-05	-0.006	1.19209e-08	-0.0001808	-0.004	0.000999995	-4.52e-05	0.014	1.19209e-08	-4.52e-05	0.014	0.002
-9e-05	-0.008	0.004	-0.000116	-0.006	0.006	-9e-05	-0.004	-0.002	-4.5e-05	0.016	-0.004	-9e-05	-0.006	1.19209e-08	-0.00018	0.002	-0.003	-4.5e-05	0.014	-0.004	-4.5e-05	0.016	0.002
-8.96e-05	-0.008	0.002	-0.0001152	-0.006	0.004	-8.96e-05	-0.004	0.002	-4.48e-05	0.014	1.19209e-08	-8.96e-05	-0.004	-0.004	-0.0001792	-0.002	0.000999995	-4.48e-05	0.014	0.004	-4.48e-05	0.014	0.004
-8.92e-05	-0.002	0.006	-0.0001144	-0.006	0.004	-8.92e-05	-2.98023e-09	-0.002	-4.46e-05	0.016	1.19209e-08	-8.92e-05	-0.006	0.004	-0.0001784	-1.49012e-09	-0.001	-4.46e-05	0.014	0.004	-4.46e-05	0.016	0.002
-8.88e-05	-0.004	0.006	-0.0001136	-0.006	0.002	-8.88e-05	-0.004	0.002	-4.44e-05	0.014	-0.004	-8.88e-05	-0.008	1.19209e-08	-0.0001776	-1.49012e-09	0.000999995	-4.44e-05	0.016	0.004	-4.44e-05	0.018	0.004
-8.84e-05	-0.006	0.004	-0.0001128	-0.008	0.002	-8.84e-05	-2.98023e-09	0.006	-4.42e-05	0.014	0.004	-8.84e-05	-0.006	-0.004	-0.0001768	-0.002	-0.001	-4.42e-05	0.016	-0.004	-4.42e-05	0.016	0.004
-8.8e-05	-0.008	0.002	-0.000112	-0.002	0.002	-8.8e-05	-0.008	0.002	-4.4e-05	0.016	1.19209e-08	-8.8e-05	-0.006	0.004	-0.000176	-0.002	-0.001	-4.4e-05	0.016	1.19209e-08	-4.4e-05	0.018	0.002
-8.76e-05	-0.006	0.004	-0.0001112	-0.008	0.002	-8.76e-05	-0.008	-0.002	-4.38e-05	0.016	1.19209e-08	-8.76e-05	-0.008	1.19209e-08	-0.0001752	-0.006	0.000999995	-4.38e-05	0.014	1.19209e-08	-4.38e-05	0.014	0.004
-8.72e-05	-0.006	0.004	-0.0001104	-0.008	0.004	-8.72e-05	-0.004	-0.002	-4.36e-05	0.018	0.004	-8.72e-05	-0.008	1.19209e-08	-0.0001744	0.002	0.000999995	-4.36e-05	0.016	1.19209e-08	-4.36e-05	0.016	0.004
-8.68e-05	-0.004	0.002	-0.0001096	-0.008	0.004	-8.68e-05	-2.98023e-09	-0.002	-4.34e-05	0.018	1.19209e-08	-8.68e-05	-0.008	-0.008	-0.0001736	-1.49012e-09	-0.003	-4.34e-05	0.014	-0.004	-4.34e-05	0.014	0.006
-8.64e-05	-0.006	0.004	-0.0001088	-0.006	0.002	-8.64e-05	-0.004	0.002	-4.32e-05	0.016	1.19209e-08	-8.64e-05	-0.004	-0.004	-0.0001728	-0.002	0.000999995	-4.32e-05	0.016	0.004	-4.32e-05	0.016	0.008
-8.6e-05	-0.006	0.008	-0.000108	-0.008	0.006	-8.6e-05	-2.98023e-09	-0.002	-4.3e-05	0.016	1.19209e-08	-8.6e-05	-0.006	1.19209e-08	-0.000172	0.002	0.000999995	-4.3e-05	0.016	0.004	-4.3e-05	0.018	0.004
-8.56e-05	-0.004	0.004	-0.0001072	-0.006	0.002	-8.56e-05	-0.004	-0.006	-4.28e-05	0.016	-0.004	-8.56e-05	-0.008	0.008	-0.0001712	-0.002	-0.001	-4.28e-05	0.012	1.19209e-08	-4.28e-05	0.02	0.004
-8.52e-05	-0.006	0.006	-0.0001064	-0.006	0.002	-8.52e-05	-0.004	0.002	-4.26e-05	0.016	1.19209e-08	-8.52e-05	-0.006	-0.008	-0.0001704	-1.49012e-09	-0.001	-4.26e-05	0.012	1.19209e-08	-4.26e-05	0.018	0.004
-8.48e-05	-0.008	0.004	-0.0001056	-0.006	0.004	-8.48e-05	-0.004	-0.006	-4.24e-05	0.018	1.19209e-08	-8.48e-05	-0.006	1.19209e-08	-0.0001696	0.002	-0.003	-4.24e-05	0.014	1.19209e-08	-4.24e-05	0.018	0.002
-8.44e-05	-0.004	0.002	-0.0001048	-0.006	0.004	-8.44e-05	-0.008	0.006	-4.22e-05	0.018	0.004	-8.44e-05	-0.006	1.19209e-08	-0.0001688	-0.002	-0.001	-4.22e-05	0.012	1.19209e-08	-4.22e-05	0.014	0.002
-8.4e-05	-0.004	0.006	-0.000104	-0.006	0.002	-8.4e-05	-0.004	0.002	-4.2e-05	0.018	-0.008	-8.4e-05	-0.008	-0.004	-0.000168	-1.49012e-09	0.000999995	-4.2e-05	0.014	1.19209e-08	-4.2e-05	0.016	0.002
-8.36e-05	-0.008	0.004	-0.0001032	-0.008	0.002	-8.36e-05	-0.008	0.002	-4.18e-05	0.018	1.19209e-08	-8.36e-05	-0.004	0.004	-0.0001672	-1.49012e-09	-0.003	-4.18e-05	0.014	0.008	-4.18e-05	0.016	0.004
-8.32e-05	-0.004	0.002	-0.0001024	-0.006	0.004	-8.32e-05	-0.004	0.002	-4.16e-05	0.02	1.19209e-08	-8.32e-05	-0.006	1.19209e-08	-0.0001664	-1.49012e-09	0.000999995	-4.16e-05	0.016	1.19209e-08	-4.16e-05	0.014	0.004
-8.28e-05	-0.006	0.004	-0.0001016	-0.006	0.002	-8.28e-05	-0.008	0.002	-4.14e-05	0.02	1.19209e-08	-8.28e-05	-0.01	1.19209e-08	-0.0001656	-0.002	-0.001	-4.14e-05	0.014	1.19209e-08	-4.14e-05	0.016	0.002
-8.24e-05	-0.006	0.004	-0.0001008	-0.006	5.96047e-09	-8.24e-05	-0.008	0.002	-4.12e-05	0.018	1.19209e-08	-8.24e-05	-0.006	1.19209e-08	-0.0001648	-1.49012e-09	-0.001	-4.12e-05	0.014	1.19209e-08	-4.12e-05	0.018	0.008
-8.2e-05	-0.006	0.002	-0.0001	-0.004	0.004	-8.2e-05	-0.008	0.002	-4.1e-05	0.018	1.19209e-08	-8.2e-05	-0.008	1.19209e-08	-0.000164	-1.49012e-09	-0.001	-4.1e-05	0.014	0.004	-4.1e-05	0.018	0.004
-8.16e-05	-0.004	0.002	-9.92e-05	-0.008	0.002	-8.16e-05	-0.004	0.006	-4.08e-05	0.016	1.19209e-08	-8.16e-05	-0.008	1.19209e-08	-0.0001632	-1.49012e-09	-0.001	-4.08e-05	0.014	1.19209e-08	-4.08e-05	0.018	0.004
-8.12e-05	-0.008	0.004	-9.84e-05	-0.006	0.002	-8.12e-05	-0.008	-0.002	-4.06e-05	0.014	0.004	-8.12e-05	-0.008	-0.004	-0.0001624	-1.49012e-09	0.000999995	-4.06e-05	0.014	0.004	-4.06e-05	0.018	0.004
-8.08e-05	-0.006	0.004	-9.76e-05	-0.004	0.002	-8.08e-05	-0.004	0.006	-4.04e-05	0.018	-0.004	-8.08e-05	-0.006	-0.004	-0.0001616	-0.002	-0.001	-4.04e-05	0.016	0.004	-4.04e-05	0.016	0.004
-8.04e-05	-0.004	0.008	-9.68e-05	-0.008	0.002	-8.04e-05	-0.004	-0.002	-4.02e-05	0.018	1.19209e-08	-8.04e-05	-0.008	1.19209e-08	-0.0001608	0.002	-0.003	-4.02e-05	0.014	1.19209e-08	-4.02e-05	0.018	0.004
-8e-05	-0.004	0.004	-9.6e-05	-0.006	0.002	-8e-05	-2.98023e-09	0.006	-4e-05	0.018	1.19209e-08	-8e-05	-0.008	-0.008	-0.00016	-0.002	-0.001	-4e-05	0.014	1.19209e-08	-4e-05	0.016	0.004
-7.96e-05	-0.008	0.002	-9.52e-05	-0.008	5.96047e-09	-7.96e-05	-0.012	-0.002	-3.98e-05	0.016	1.19209e-08	-7.96e-05	-0.008	-0.004	-0.0001592	0.004	0.000999995	-3.98e-05	0.014	1.19209e-08	-3.98e-05	0.016	0.004
-7.92e-05	-0.006	0.006	-9.44e-05	-0.008	0.002	-7.92e-05	-0.008	-0.002	-3.96e-05	0.016	1.19209e-08	-7.92e-05	-0.008	0.004	-0.0001584	-0.002	-0.001	-3.96e-05	0.012	1.19209e-08	-3.96e-05	0.016	0.004
-7.88e-05	-0.004	0.002	-9.36e-05	-0.008	0.002	-7.88e-05	-0.012	-0.002	-3.94e-05	0.016	1.19209e-08	-7.88e-05	-0.006	-0.004	-0.0001576	-1.49012e-09	-0.001	-3.94e-05	0.014	1.19209e-08	-3.94e-05	0.016	0.004
-7.84e-05	-0.008	0.002	-9.28e-05	-0.004	0.002	-7.84e-05	-0.008	0.002	-3.92e-05	0.016	1.19209e-08	-7.84e-05	-0.006	-0.004	-0.0001568	-1.49012e-09	0.000999995	-3.92e-05	0.014	1.19209e-08	-3.92e-05	0.014	0.004
-7.8e-05	-0.006	0.006	-9.2e-05	-0.008	5.96047e-09	-7.8e-05	-0.012	-0.002	-3.9e-05	0.018	1.19209e-08	-7.8e-05	-0.006	-0.004	-0.000156	0.002	0.000999995	-3.9e-05	0.014	1.19209e-08	-3.9e-05	0.014	0.004
-7.76e-05	-0.006	0.006	-9.12e-05	-0.01	0.006	-7.76e-05	-0.008	-0.002	-3.88e-05	0.02	0.004	-7.76e-05	-0.006	0.004	-0.0001552	-1.49012e-09	0.003	-3.88e-05	0.014	-0.008	-3.88e-05	0.014	0.006
-7.72e-05	-0.006	0.004	-9.04e-05	-0.006	0.002	-7.72e-05	-0.008	-0.002	-3.86e-05	0.016	1.19209e-08	-7.72e-05	-0.006	-0.004	-0.0001544	-0.002	-0.001	-3.86e-05	0.014	0.004	-3.86e-05	0.014	0.004
-7.68e-05	-0.008	0.006	-8.96e-05	-0.006	0.002	-7.68e-05	-0.004	-0.002	-3.84e-05	0.018	1.19209e-08	-7.68e-05	-0.008	1.19209e-08	-0.0001536	0.002	-0.001	-3.84e-05	0.014	1.19209e-08	-3.84e-05	0.018	0.002
-7.64e-05	-0.004	0.004	-8.88e-05	-0.008	0.004	-7.64e-05	-2.98023e-09	-0.002	-3.82e-05	0.014	1.19209e-08	-7.64e-05	-0.006	1.19209e-08	-0.0001528	0.002	-0.001	-3.82e-05	0.012	1.19209e-08	-3.82e-05	0.02	0.002
-7.6e-05	-0.006	0.004	-8.8e-05	-0.006	0.002	-7.6e-05	-0.004	-0.006	-3.8e-05	0.016	1.19209e-08	-7.6e-05	-0.006	1.19209e-08	-0.000152	-0.004	-0.001	-3.8e-05	0.014	1.19209e-08	-3.8e-05	0.018	0.004
-7.56e-05	-0.008	0.004	-8.72e-05	-0.006	0.002	-7.56e-05	-0.012	0.002	-3.78e-05	0.02	-0.004	-7.56e-05	-0.006	1.19209e-08	-0.0001512	-1.49012e-09	-0.003	-3.78e-05	0.016	1.19209e-08	-3.78e-05	0.018	0.004
-7.52e-05	-0.006	0.004	-8.64e-05	-0.008	0.002	-7.52e-05	-0.016	-0.006	-3.76e-05	0.016	1.19209e-08	-7.52e-05	-0.006	1.19209e-08	-0.0001504	-1.49012e-09	-0.001	-3.76e-05	0.014	0.004	-3.76e-05	0.016	5.96047e-09
-7.48e-05	-0.006	0.004	-8.56e-05	-0.004	0.004	-7.48e-05	-0.008	-0.002	-3.74e-05	0.018	-0.004	-7.48e-05	-0.008	0.004	-0.0001496	-0.002	-0.001	-3.74e-05	0.016	0.004	-3.74e-05	0.016	0.004
-7.44e-05	-0.008	0.006	-8.48e-05	-0.002	5.96047e-09	-7.44e-05	-0.008	-0.002	-3.72e-05	0.02	1.19209e-08	-7.44e-05	-0.006	1.19209e-08	-0.0001488	0.002	-0.003	-3.72e-05	0.014	1.19209e-08	-3.72e-05	0.018	0.006
-7.4e-05	-0.004	0.002	-8.4e-05	-0.008	0.006	-7.4e-05	-0.004	-0.002	-3.7e-05	0.02	1.19209e-08	-7.4e-05	-0.008	1.19209e-08	-0.000148	-0.004	-0.001	-3.7e-05	0.012	1.19209e-08	-3.7e-05	0.018	0.002
-7.36e-05	-0.006	0.006	-8.32e-05	-0.004	5.96047e-09	-7.36e-05	-0.008	-0.002	-3.68e-05	0.018	1.19209e-08	-7.36e-05	-0.004	1.19209e-08	-0.0001472	-1.49012e-09	-0.001	-3.68e-05	0.012	1.19209e-08	-3.68e-05	0.018	0.004
-7.32e-05	-0.006	0.004	-8.24e-05	-0.008	0.002	-7.32e-05	-0.004	-0.002	-3.66e-05	0.014	0.008	-7.32e-05	-0.004	1.19209e-08	-0.0001464	0.002	-0.001	-3.66e-05	0.014	0.004	-3.66e-05	0.016	0.004
-7.28e-05	-0.004	0.004	-8.16e-05	-0.004	0.002	-7.28e-05	-0.004	-0.002	-3.64e-05	0.014	1.19209e-08	-7.28e-05	-0.006	0.004	-0.0001456	-0.004	-0.001	-3.64e-05	0.014	1.19209e-08	-3.64e-05	0.014	0.004
-7.24e-05	-0.004	0.002	-8.08e-05	-0.006	0.004	-7.24e-05	-2.98023e-09	-0.002	-3.62e-05	0.016	-0.004	-7.24e-05	-0.004	-0.004	-0.0001448	-0.002	-0.001	-3.62e-05	0.014	1.19209e-08	-3.62e-05	0.016	0.004
-7.2e-05	-0.01	0.004	-8e-05	-0.006	0.002	-7.2e-05	-0.008	-0.006	-3.6e-05	0.02	1.19209e-08	-7.2e-05	-0.006	-0.004	-0.000144	-1.49012e-09	-0.003	-3.6e-05	0.016	1.19209e-08	-3.6e-05	0.018	0.002
-7.16e-05	-0.008	0.002	-7.92e-05	-0.006	0.002	-7.16e-05	-0.004	-0.002	-3.58e-05	0.018	1.19209e-08	-7.16e-05	-0.006	1.19209e-08	-0.0001432	-0.004	0.003	-3.58e-05	0.016	0.004	-3.58e-05	0.02	0.004
-7.12e-05	-0.006	0.002	-7.84e-05	-0.008	5.96047e-09	-7.12e-05	-0.012	-0.002	-3.56e-05	0.016	-0.004	-7.12e-05	-0.006	1.19209e-08	-0.0001424	-0.002	-0.001	-3.56e-05	0.012	-0.004	-3.56e-05	0.02	0.002
-7.08e-05	-0.008	0.006	-7.76e-05	-0.004	0.002	-7.08e-05	-0.004	0.002	-3.54e-05	0.02	1.19209e-08	-7.08e-05	-0.008	0.004	-0.0001416	-1.49012e-09	-0.001	-3.54e-05	0.014	0.004	-3.54e-05	0.018	0.004
-7.04e-05	-0.008	0.004	-7.68e-05	-0.006	0.002	-7.04e-05	-0.008	-0.002	-3.52e-05	0.014	1.19209e-08	-7.04e-05	-0.004	1.19209e-08	-0.0001408	-1.49012e-09	-0.003	-3.52e-05	0.014	1.19209e-08	-3.52e-05	0.016	0.004
-7e-05	-0.004	0.004	-7.6e-05	-0.006	5.96047e-09	-7e-05	-0.012	-0.002	-3.5e-05	0.016	0.004	-7e-05	-0.006	-0.004	-0.00014	-1.49012e-09	-0.001	-3.5e-05	0.014	1.19209e-08	-3.5e-05	0.018	0.002
-6.96e-05	-0.01	0.004	-7.52e-05	-0.006	0.004	-6.96e-05	-0.004	-0.002	-3.48e-05	0.016	-0.008	-6.96e-05	-0.004	1.19209e-08	-0.0001392	-0.002	0.000999995	-3.48e-05	0.014	1.19209e-08	-3.48e-05	0.016	0.004
-6.92e-05	-0.008	0.002	-7.44e-05	-0.006	0.002	-6.92e-05	-0.016	-0.002	-3.46e-05	0.018	0.004	-6.92e-05	-0.008	1.19209e-08	-0.0001384	-1.49012e-09	-0.001	-3.46e-05	0.014	1.19209e-08	-3.46e-05	0.016	0.004
-6.88e-05	-0.006	0.004	-7.36e-05	-0.008	0.002	-6.88e-05	-0.004	-0.002	-3.44e-05	0.014	0.004	-6.88e-05	-0.008	1.19209e-08	-0.0001376	-0.002	-0.001	-3.44e-05	0.016	-0.004	-3.44e-05	0.016	0.004
-6.84e-05	-0.008	0.006	-7.28e-05	-0.008	0.002	-6.84e-05	-0.008	-0.002	-3.42e-05	0.016	1.19209e-08	-6.84e-05	-0.008	1.19209e-08	-0.0001368	-1.49012e-09	0.000999995	-3.42e-05	0.016	0.004	-3.42e-05	0.016	0.004
-6.8e-05	-0.006	0.004	-7.2e-05	-0.004	5.96047e-09	-6.8e-05	-0.008	-0.002	-3.4e-05	0.016	-0.004	-6.8e-05	-0.006	1.19209e-08	-0.000136	-1.49012e-09	-0.005	-3.4e-05	0.016	1.19209e-08	-3.4e-05	0.016	0.004
-6.76e-05	-0.008	0.004	-7.12e-05	-0.006	0.004	-6.76e-05	-2.98023e-09	0.002	-3.38e-05	0.018	-0.004	-6.76e-05	-0.008	1.19209e-08	-0.0001352	-1.49012e-09	-0.001	-3.38e-05	0.014	1.19209e-08	-3.38e-05	0.02	0.004
-6.72e-05	-0.008	0.004	-7.04e-05	-0.01	0.002	-6.72e-05	-0.004	0.002	-3.36e-05	0.018	1.19209e-08	-6.72e-05	-0.008	1.19209e-08	-0.0001344	-0.002	0.000999995	-3.36e-05	0.016	1.19209e-08	-3.36e-05	0.018	0.004
-6.68e-05	-0.008	0.004	-6.96e-05	-0.004	0.002	-6.68e-05	-0.008	-0.002	-3.34e-05	0.018	1.19209e-08	-6.68e-05	-0.004	0.008	-0.0001336	-1.49012e-09	-0.003	-3.34e-05	0.014	-0.004	-3.34e-05	0.02	0.002
-6.64e-05	-0.008	0.002	-6.88e-05	-0.008	0.002	-6.64e-05	-0.008	-0.002	-3.32e-05	0.02	0.004	-6.64e-05	-0.006	1.19209e-08	-0.0001328	-0.002	0.000999995	-3.32e-05	0.014	-0.004	-3.32e-05	0.016	0.004
-6.6e-05	-0.01	0.004	-6.8e-05	-0.006	0.004	-6.6e-05	-0.004	0.002	-3.3e-05	0.018	0.004	-6.6e-05	-0.01	1.19209e-08	-0.000132	-1.49012e-09	-0.001	-3.3e-05	0.018	-0.004	-3.3e-05	0.018	0.004
-6.56e-05	-0.008	0.002	-6.72e-05	-0.008	0.004	-6.56e-05	-0.008	-0.002	-3.28e-05	0.016	0.004	-6.56e-05	-0.006	0.004	-0.0001312	-0.002	-0.003	-3.28e-05	0.014	1.19209e-08	-3.28e-05	0.014	0.004
-6.52e-05	-0.006	0.002	-6.64e-05	-0.008	0.002	-6.52e-05	-0.012	-0.002	-3.26e-05	0.018	1.19209e-08	-6.52e-05	-0.006	1.19209e-08	-0.0001304	-1.49012e-09	-0.001	-3.26e-05	0.016	1.19209e-08	-3.26e-05	0.016	0.002
-6.48e-05	-0.004	0.004	-6.56e-05	-0.006	0.004	-6.48e-05	-0.008	-0.002	-3.24e-05	0.018	1.19209e-08	-6.48e-05	-0.01	0.004	-0.0001296	-0.002	0.003	-3.24e-05	0.016	1.19209e-08	-3.24e-05	0.018	0.004
-6.44e-05	-0.01	0.004	-6.48e-05	-0.006	0.002	-6.44e-05	-0.008	-0.006	-3.22e-05	0.018	1.19209e-08	-6.44e-05	-0.008	1.19209e-08	-0.0001288	-0.002	0.000999995	-3.22e-05	0.014	-0.004	-3.22e-05	0.018	0.004
-6.4e-05	-0.008	0.006	-6.4e-05	-0.004	5.96047e-09	-6.4e-05	-0.012	-0.002	-3.2e-05	0.018	1.19209e-08	-6.4e-05	-0.006	-0.004	-0.000128	-1.49012e-09	0.000999995	-3.2e-05	0.014	1.19209e-08	-3.2e-05	0.018	0.004
-6.36e-05	-0.004	5.96047e-09	-6.32e-05	-0.006	0.002	-6.36e-05	-0.004	-0.002	-3.18e-05	0.018	-0.004	-6.36e-05	-0.008	1.19209e-08	-0.0001272	-0.002	-0.001	-3.18e-05	0.014	1.19209e-08	-3.18e-05	0.018	0.002
-6.32e-05	-0.006	0.004	-6.24e-05	-0.006	0.002	-6.32e-05	-0.008	-0.002	-3.16e-05	0.018	0.004	-6.32e-05	-0.004	1.19209e-08	-0.0001264	-1.49012e-09	-0.001	-3.16e-05	0.012	1.19209e-08	-3.16e-05	0.02	0.004
-6.28e-05	-0.008	0.004	-6.16e-05	-0.006	0.002	-6.28e-05	-0.004	-0.002	-3.14e-05	0.018	1.19209e-08	-6.28e-05	-0.008	0.004	-0.0001256	0.004	-0.001	-3.14e-05	0.014	0.004	-3.14e-05	0.016	0.004
-6.24e-05	-0.008	0.004	-6.08e-05	-0.008	5.96047e-09	-6.24e-05	-0.004	0.002	-3.12e-05	0.02	-0.004	-6.24e-05	-0.008	-0.004	-0.0001248	-0.002	-0.003	-3.12e-05	0.014	0.004	-3.12e-05	0.018	0.004
-6.2e-05	-0.006	0.002	-6e-05	-0.006	0.002	-6.2e-05	-0.012	-0.002	-3.1e-05	0.018	0.008	-6.2e-05	-0.008	1.19209e-08	-0.000124	-1.49012e-09	0.000999995	-3.1e-05	0.014	1.19209e-08	-3.1e-05	0.02	0.004
-6.16e-05	-0.002	0.004	-5.92e-05	-0.008	0.004	-6.16e-05	-0.004	-0.002	-3.08e-05	0.016	1.19209e-08	-6.16e-05	-0.006	1.19209e-08	-0.0001232	-1.49012e-09	-0.003	-3.08e-05	0.016	1.19209e-08	-3.08e-05	0.02	0.002
-6.12e-05	-0.006	0.004	-5.84e-05	-0.006	0.002	-6.12e-05	-0.004	0.002	-3.06e-05	0.016	1.19209e-08	-6.12e-05	-0.006	0.004	-0.0001224	-0.002	-0.001	-3.06e-05	0.014	-0.008	-3.06e-05	0.016	0.008
-6.08e-05	-0.01	0.002	-5.76e-05	-0.008	0.004	-6.08e-05	-0.004	-0.002	-3.04e-05	0.014	1.19209e-08	-6.08e-05	-0.006	1.19209e-08	-0.0001216	0.002	0.000999995	-3.04e-05	0.012	1.19209e-08	-3.04e-05	0.018	0.004
-6.04e-05	-0.012	0.002	-5.68e-05	-0.006	0.002	-6.04e-05	-0.004	0.002	-3.02e-05	0.018	1.19209e-08	-6.04e-05	-0.01	0.004	-0.0001208	-1.49012e-09	-0.003	-3.02e-05	0.014	1.19209e-08	-3.02e-05	0.016	0.004
-6e-05	-0.006	5.96047e-09	-5.6e-05	-0.008	0.002	-6e-05	-0.008	-0.002	-3e-05	0.018	1.19209e-08	-6e-05	-0.008	0.004	-0.00012	-1.49012e-09	-0.001	-3e-05	0.014	1.19209e-08	-3e-05	0.016	0.004
-5.96e-05	-0.004	0.006	-5.52e-05	-0.006	0.004	-5.96e-05	-0.004	0.002	-2.98e-05	0.02	1.19209e-08	-5.96e-05	-0.006	1.19209e-08	-0.0001192	0.002	-0.001	-2.98e-05	0.016	-0.004	-2.98e-05	0.018	0.004
-5.92e-05	-0.008	0.004	-5.44e-05	-0.008	0.002	-5.92e-05	-2.98023e-09	0.002	-2.96e-05	0.018	-0.008	-5.92e-05	-0.006	0.004	-0.0001184	-0.002	-0.001	-2.96e-05	0.016	1.19209e-08	-2.96e-05	0.018	0.004
-5.88e-05	-0.006	0.002	-5.36e-05	-0.006	0.004	-5.88e-05	-0.004	-0.002	-2.94e-05	0.018	-0.004	-5.88e-05	-0.008	0.004	-0.0001176	0.002	-0.001	-2.94e-05	0.014	0.004	-2.94e-05	0.018	0.004
-5.84e-05	-0.004	0.002	-5.28e-05	-0.006	0.002	-5.84e-05	-0.008	-0.002	-2.92e-05	0.02	1.19209e-08	-5.84e-05	-0.006	1.19209e-08	-0.0001168	-1.49012e-09	-0.001	-2.92e-05	0.016	1.19209e-08	-2.92e-05	0.018	0.004
-5.8e-05	-0.008	0.004	-5.2e-05	-0.004	0.002	-5.8e-05	-0.012	0.002	-2.9e-05	0.02	0.004	-5.8e-05	-0.008	1.19209e-08	-0.000116	0.002	-0.001	-2.9e-05	0.014	0.008	-2.9e-05	0.016	0.004
-5.76e-05	-0.004	0.004	-5.12e-05	0.006	0.004	-5.76e-05	-0.012	-0.002	-2.88e-05	0.018	0.004	-5.76e-05	-0.006	0.004	-0.0001152	-1.49012e-09	0.000999995	-2.88e-05	0.012	1.19209e-08	-2.88e-05	0.016	0.002
-5.72e-05	-0.002	0.004	-5.04e-05	0.008	0.004	-5.72e-05	-0.008	-0.002	-2.86e-05	0.018	-0.004	-5.72e-05	-0.006	1.19209e-08	-0.0001144	-0.004	-0.003	-2.86e-05	0.012	-0.004	-2.86e-05	0.018	0.002
-5.68e-05	-0.008	0.004	-4.96e-05	0.016	0.002	-5.68e-05	-0.008	0.006	-2.84e-05	0.018	0.004	-5.68e-05	-0.006	1.19209e-08	-0.0001136	-1.49012e-09	-0.001	-2.84e-05	0.012	1.19209e-08	-2.84e-05	0.022	0.006
-5.64e-05	-0.008	0.002	-4.88e-05	0.016	0.002	-5.64e-05	-0.008	-0.01	-2.82e-05	0.02	-0.004	-5.64e-05	-0.006	0.004	-0.0001128	-0.004	0.000999995	-2.82e-05	0.014	1.19209e-08	-2.82e-05	0.02	0.004
-5.6e-05	-0.006	0.002	-4.8e-05	0.018	0.002	-5.6e-05	-0.008	0.002	-2.8e-05	0.018	0.008	-5.6e-05	-0.006	1.19209e-08	-0.000112	-0.002	-0.001	-2.8e-05	0.014	-0.004	-2.8e-05	0.016	0.004
-5.56e-05	-0.008	0.004	-4.72e-05	0.018	0.002	-5.56e-05	-0.008	0.006	-2.78e-05	0.018	-0.004	-5.56e-05	-0.004	1.19209e-08	-0.0001112	-1.49012e-09	0.003	-2.78e-05	0.014	1.19209e-08	-2.78e-05	0.014	0.004
-5.52e-05	-0.006	0.002	-4.64e-05	0.016	0.002	-5.52e-05	-0.012	0.002	-2.76e-05	0.018	1.19209e-08	-5.52e-05	-0.004	1.19209e-08	-0.0001104	-1.49012e-09	-0.001	-2.76e-05	0.014	1.19209e-08	-2.76e-05	0.018	5.96047e-09
-5.48e-05	-0.004	0.004	-4.56e-05	0.018	0.004	-5.48e-05	-0.008	-0.002	-2.74e-05	0.02	1.19209e-08	-5.48e-05	-0.006	1.19209e-08	-0.0001096	-1.49012e-09	-0.001	-2.74e-05	0.014	0.004	-2.74e-05	0.016	0.004
-5.44e-05	-0.004	0.004	-4.48e-05	0.018	0.002	-5.44e-05	-0.004	0.006	-2.72e-05	0.02	1.19209e-08	-5.44e-05	-0.008	-0.004	-0.0001088	-0.002	0.000999995	-2.72e-05	0.014	1.19209e-08	-2.72e-05	0.018	0.002
-5.4e-05	-0.008	0.004	-4.4e-05	0.018	0.002	-5.4e-05	-0.008	0.002	-2.7e-05	0.022	0.004	-5.4e-05	-0.006	0.008	-0.000108	-1.49012e-09	-0.001	-2.7e-05	0.014	1.19209e-08	-2.7e-05	0.022	0.004
-5.36e-05	-0.004	0.004	-4.32e-05	0.02	0.002	-5.36e-05	-2.98023e-09	-0.002	-2.68e-05	0.02	0.004	-5.36e-05	-0.006	1.19209e-08	-0.0001072	-0.004	0.000999995	-2.68e-05	0.014	1.19209e-08	-2.68e-05	0.02	0.004
-5.32e-05	3.35276e-09	0.002	-4.24e-05	0.018	0.002	-5.32e-05	-0.004	-0.006	-2.66e-05	0.022	1.19209e-08	-5.32e-05	-0.002	0.004	-0.0001064	0.002	-0.001	-2.66e-05	0.014	1.19209e-08	-2.66e-05	0.018	0.004
-5.28e-05	0.006	0.004	-4.16e-05	0.018	0.004	-5.28e-05	0.008	0.002	-2.64e-05	0.02	-0.004	-5.28e-05	-0.008	0.004	-0.0001056	-1.49012e-09	-0.001	-2.64e-05	0.014	1.19209e-08	-2.64e-05	0.018	0.004
-5.24e-05	0.008	0.004	-4.08e-05	0.02	0.004	-5.24e-05	0.004	0.002	-2.62e-05	0.018	-0.004	-5.24e-05	-0.006	1.19209e-08	-0.0001048	-1.49012e-09	-0.001	-2.62e-05	0.014	-0.008	-2.62e-05	0.018	0.006
-5.2e-05	0.008	0.004	-4e-05	0.018	0.002	-5.2e-05	0.012	-0.002	-2.6e-05	0.018	1.19209e-08	-5.2e-05	-0.004	-0.004	-0.000104	0.002	-0.001	-2.6e-05	0.014	1.19209e-08	-2.6e-05	0.02	0.002
-5.16e-05	0.012	0.004	-3.92e-05	0.018	0.006	-5.16e-05	0.008	0.006	-2.58e-05	0.02	1.19209e-08	-5.16e-05	-0.004	1.19209e-08	-0.0001032	-0.004	-0.001	-2.58e-05	0.014	0.004	-2.58e-05	0.018	0.004
-5.12e-05	0.012	0.002	-3.84e-05	0.02	0.002	-5.12e-05	0.012	0.002	-2.56e-05	0.018	1.19209e-08	-5.12e-05	3.35276e-09	-0.004	-0.0001024	0.006	-0.001	-2.56e-05	0.012	-0.004	-2.56e-05	0.018	0.006
-5.08e-05	0.016	0.006	-3.76e-05	0.018	0.004	-5.08e-05	0.012	-0.002	-2.54e-05	0.018	0.004	-5.08e-05	0.006	0.004	-0.0001016	-0.002	-0.001	-2.54e-05	0.014	1.19209e-08	-2.54e-05	0.018	0.002
-5.04e-05	0.016	0.004	-3.68e-05	0.018	0.002	-5.04e-05	0.012	0.006	-2.52e-05	0.018	-0.004	-5.04e-05	0.008	1.19209e-08	-0.0001008	-1.49012e-09	-0.003	-2.52e-05	0.012	0.004	-2.52e-05	0.02	0.004
-5e-05	0.018	0.004	-3.6e-05	0.016	0.004	-5e-05	0.016	-0.002	-2.5e-05	0.02	0.004	-5e-05	0.006	-0.004	-0.0001	-0.002	0.000999995	-2.5e-05	0.014	0.004	-2.5e-05	0.018	0.006
-4.96e-05	0.018	0.008	-3.52e-05	0.018	0.002	-4.96e-05	0.016	0.006	-2.48e-05	0.02	1.19209e-08	-4.96e-05	0.008	-0.004	-9.92e-05	-0.002	-0.001	-2.48e-05	0.012	-0.004	-2.48e-05	0.018	0.004
-4.92e-05	0.016	0.004	-3.44e-05	0.02	0.002	-4.92e-05	0.016	-0.002	-2.46e-05	0.022	0.004	-4.92e-05	0.012	0.004	-9.84e-05	-1.49012e-09	-0.001	-2.46e-05	0.01	1.19209e-08	-2.46e-05	0.02	0.004
-4.88e-05	0.016	0.002	-3.36e-05	0.02	0.004	-4.88e-05	0.016	0.006	-2.44e-05	0.02	1.19209e-08	-4.88e-05	0.014	-0.004	-9.76e-05	-0.002	-0.005	-2.44e-05	0.014	-0.004	-2.44e-05	0.022	0.002
-4.84e-05	0.018	0.002	-3.28e-05	0.02	0.004	-4.84e-05	0.016	-0.006	-2.42e-05	0.016	-0.004	-4.84e-05	0.016	1.19209e-08	-9.68e-05	-0.002	-0.003	-2.42e-05	0.012	1.19209e-08	-2.42e-05	0.02	0.002
-4.8e-05	0.02	0.004	-3.2e-05	0.014	0.004	-4.8e-05	0.02	-0.002	-2.4e-05	0.018	1.19209e-08	-4.8e-05	0.018	-0.004	-9.6e-05	-0.002	-0.003	-2.4e-05	0.014	0.004	-2.4e-05	0.016	0.006
-4.76e-05	0.018	0.002	-3.12e-05	0.016	0.004	-4.76e-05	0.012	-0.002	-2.38e-05	0.016	-0.004	-4.76e-05	0.014	1.19209e-08	-9.52e-05	0.002	-0.005	-2.38e-05	0.012	-0.004	-2.38e-05	0.02	0.004
-4.72e-05	0.018	0.004	-3.04e-05	0.02	0.002	-4.72e-05	0.012	-0.006	-2.36e-05	0.02	-0.004	-4.72e-05	0.012	1.19209e-08	-9.44e-05	-0.002	-0.001	-2.36e-05	0.012	1.19209e-08	-2.36e-05	0.018	0.002
-4.68e-05	0.018	0.004	-2.96e-05	0.016	0.002	-4.68e-05	0.016	-0.002	-2.34e-05	0.018	1.19209e-08	-4.68e-05	0.018	1.19209e-08	-9.36e-05	-0.002	0.000999995	-2.34e-05	0.012	1.19209e-08	-2.34e-05	0.02	5.96047e-09
-4.64e-05	0.02	0.004	-2.88e-05	0.018	0.004	-4.64e-05	0.016	-0.002	-2.32e-05	0.016	1.19209e-08	-4.64e-05	0.016	1.19209e-08	-9.28e-05	-0.002	-0.001	-2.32e-05	0.012	1.19209e-08	-2.32e-05	0.018	0.004
-4.6e-05	0.018	0.006	-2.8e-05	0.018	0.002	-4.6e-05	0.016	-0.002	-2.3e-05	0.018	-0.004	-4.6e-05	0.016	1.19209e-08	-9.2e-05	-0.002	0.000999995	-2.3e-05	0.01	0.004	-2.3e-05	0.016	0.004
-4.56e-05	0.016	0.004	-2.72e-05	0.02	0.002	-4.56e-05	0.016	-0.002	-2.28e-05	0.018	0.004	-4.56e-05	0.018	-0.004	-9.12e-05	-0.002	-0.001	-2.28e-05	0.014	0.008	-2.28e-05	0.016	0.006
-4.52e-05	0.018	0.004	-2.64e-05	0.018	0.002	-4.52e-05	0.012	0.002	-2.26e-05	0.016	0.004	-4.52e-05	0.016	1.19209e-08	-9.04e-05	-0.002	-0.001	-2.26e-05	0.012	-0.004	-2.26e-05	0.014	0.004
-4.48e-05	0.02	0.004	-2.56e-05	0.018	0.004	-4.48e-05	0.012	-0.002	-2.24e-05	0.018	-0.004	-4.48e-05	0.018	0.004	-8.96e-05	-0.002	0.000999995	-2.24e-05	0.014	1.19209e-08	-2.24e-05	0.016	0.002
-4.44e-05	0.018	0.004	-2.48e-05	0.02	0.002	-4.44e-05	0.02	0.002	-2.22e-05	0.018	0.004	-4.44e-05	0.018	1.19209e-08	-8.88e-05	0.002	-0.001	-2.22e-05	0.014	0.004	-2.22e-05	0.018	0.002
-4.4e-05	0.018	0.006	-2.4e-05	0.02	0.004	-4.4e-05	0.012	0.002	-2.2e-05	0.018	1.19209e-08	-4.4e-05	0.016	0.008	-8.8e-05	-0.002	-0.003	-2.2e-05	0.012	1.19209e-08	-2.2e-05	0.022	0.002
-4.36e-05	0.016	0.004	-2.32e-05	0.018	0.004	-4.36e-05	0.016	-0.002	-2.18e-05	0.02	1.19209e-08	-4.36e-05	0.016	1.19209e-08	-8.72e-05	-0.002	-0.001	-2.18e-05	0.012	1.19209e-08	-2.18e-05	0.02	0.004
-4.32e-05	0.02	0.004	-2.24e-05	0.022	0.002	-4.32e-05	0.016	-0.002	-2.16e-05	0.018	-0.004	-4.32e-05	0.016	1.19209e-08	-8.64e-05	-0.002	0.000999995	-2.16e-05	0.012	1.19209e-08	-2.16e-05	0.02	0.004
-4.28e-05	0.02	0.004	-2.16e-05	0.018	0.004	-4.28e-05	0.016	-0.002	-2.14e-05	0.018	1.19209e-08	-4.28e-05	0.016	1.19209e-08	-8.56e-05	0.002	0.000999995	-2.14e-05	0.012	1.19209e-08	-2.14e-05	0.018	0.006
-4.24e-05	0.018	0.004	-2.08e-05	0.022	5.96047e-09	-4.24e-05	0.02	-0.002	-2.12e-05	0.018	1.19209e-08	-4.24e-05	0.018	1.19209e-08	-8.48e-05	-1.49012e-09	-0.001	-2.12e-05	0.014	0.004	-2.12e-05	0.016	0.004
-4.2e-05	0.016	0.004	-2e-05	0.02	0.002	-4.2e-05	0.016	0.006	-2.1e-05	0.02	1.19209e-08	-4.2e-05	0.018	1.19209e-08	-8.4e-05	-1.49012e-09	-0.001	-2.1e-05	0.016	0.004	-2.1e-05	0.018	0.004
-4.16e-05	0.018	0.004	-1.92e-05	0.02	0.002	-4.16e-05	0.016	-0.002	-2.08e-05	0.02	1.19209e-08	-4.16e-05	0.016	-0.004	-8.32e-05	-0.002	-0.001	-2.08e-05	0.014	-0.004	-2.08e-05	0.014	0.004
-4.12e-05	0.02	0.004	-1.84e-05	0.02	0.004	-4.12e-05	0.016	-0.002	-2.06e-05	0.02	1.19209e-08	-4.12e-05	0.016	1.19209e-08	-8.24e-05	-0.002	-0.001	-2.06e-05	0.016	-0.004	-2.06e-05	0.02	0.004
-4.08e-05	0.018	0.004	-1.76e-05	0.02	0.002	-4.08e-05	0.012	0.002	-2.04e-05	0.018	-0.004	-4.08e-05	0.02	1.19209e-08	-8.16e-05	0.004	-0.001	-2.04e-05	0.012	1.19209e-08	-2.04e-05	0.018	0.004
-4.04e-05	0.02	0.002	-1.68e-05	0.02	0.002	-4.04e-05	0.02	-0.002	-2.02e-05	0.02	-0.004	-4.04e-05	0.018	-0.004	-8.08e-05	-0.002	-0.001	-2.02e-05	0.016	1.19209e-08	-2.02e-05	0.018	0.006
-4e-05	0.016	0.004	-1.6e-05	0.02	0.002	-4e-05	0.02	-0.002	-2e-05	0.018	1.19209e-08	-4e-05	0.018	1.19209e-08	-8e-05	0.002	-0.001	-2e-05	0.012	0.004	-2e-05	0.02	0.004
-3.96e-05	0.016	0.002	-1.52e-05	0.02	0.002	-3.96e-05	0.02	0.006	-1.98e-05	0.02	1.19209e-08	-3.96e-05	0.016	-0.004	-7.92e-05	-1.49012e-09	-0.001	-1.98e-05	0.014	-0.004	-1.98e-05	0.022	0.002
-3.92e-05	0.02	0.002	-1.44e-05	0.018	0.004	-3.92e-05	0.02	-0.002	-1.96e-05	0.018	-0.004	-3.92e-05	0.018	1.19209e-08	-7.84e-05	-0.002	-0.001	-1.96e-05	0.014	1.19209e-08	-1.96e-05	0.02	0.006
-3.88e-05	0.02	0.004	-1.36e-05	0.02	0.004	-3.88e-05	0.016	-0.002	-1.94e-05	0.018	-0.008	-3.88e-05	0.016	0.004	-7.76e-05	-0.002	-0.001	-1.94e-05	0.012	1.19209e-08	-1.94e-05	0.022	0.004
-3.84e-05	0.016	0.004	-1.28e-05	0.02	5.96047e-09	-3.84e-05	0.012	-0.002	-1.92e-05	0.016	1.19209e-08	-3.84e-05	0.018	1.19209e-08	-7.68e-05	0.002	-0.001	-1.92e-05	0.014	1.19209e-08	-1.92e-05	0.02	0.004
-3.8e-05	0.014	0.002	-1.2e-05	0.016	0.002	-3.8e-05	0.016	-0.002	-1.9e-05	0.018	1.19209e-08	-3.8e-05	0.016	0.004	-7.6e-05	-1.49012e-09	0.003	-1.9e-05	0.012	1.19209e-08	-1.9e-05	0.018	0.004
-3.76e-05	0.02	0.004	-1.12e-05	0.018	0.004	-3.76e-05	0.02	0.002	-1.88e-05	0.02	1.19209e-08	-3.76e-05	0.014	-0.004	-7.52e-05	0.004	-0.001	-1.88e-05	0.014	1.19209e-08	-1.88e-05	0.018	0.002
-3.72e-05	0.018	0.004	-1.04e-05	0.018	0.002	-3.72e-05	0.02	-0.002	-1.86e-05	0.02	1.19209e-08	-3.72e-05	0.014	0.004	-7.44e-05	-1.49012e-09	0.000999995	-1.86e-05	0.014	0.004	-1.86e-05	0.014	0.004
-3.68e-05	0.018	0.004	-9.6e-06	0.02	0.002	-3.68e-05	0.016	0.002	-1.84e-05	0.018	1.19209e-08	-3.68e-05	0.014	1.19209e-08	-7.36e-05	-1.49012e-09	-0.001	-1.84e-05	0.016	-0.004	-1.84e-05	0.016	0.004
-3.64e-05	0.018	0.006	-8.8e-06	0.018	0.002	-3.64e-05	0.016	-0.002	-1.82e-05	0.018	1.19209e-08	-3.64e-05	0.02	1.19209e-08	-7.28e-05	0.004	-0.001	-1.82e-05	0.014	0.004	-1.82e-05	0.022	5.96047e-09
-3.6e-05	0.018	0.004	-8e-06	0.02	5.96047e-09	-3.6e-05	0.008	-0.002	-1.8e-05	0.02	1.19209e-08	-3.6e-05	0.014	1.19209e-08	-7.2e-05	-0.006	0.000999995	-1.8e-05	0.014	0.004	-1.8e-05	0.02	0.004
-3.56e-05	0.018	0.004	-7.2e-06	0.024	5.96047e-09	-3.56e-05	0.016	0.002	-1.78e-05	0.018	1.19209e-08	-3.56e-05	0.014	-0.004	-7.12e-05	0.002	-0.001	-1.78e-05	0.018	1.19209e-08	-1.78e-05	0.02	0.006
-3.52e-05	0.018	0.006	-6.4e-06	0.028	0.004	-3.52e-05	0.016	0.002	-1.76e-05	0.018	0.004	-3.52e-05	0.018	1.19209e-08	-7.04e-05	-0.004	-0.001	-1.76e-05	0.014	0.004	-1.76e-05	0.018	0.004
-3.48e-05	0.018	0.002	-5.6e-06	0.032	0.002	-3.48e-05	0.016	0.006	-1.74e-05	0.016	-0.008	-3.48e-05	0.016	1.19209e-08	-6.96e-05	-0.002	-0.001	-1.74e-05	0.012	1.19209e-08	-1.74e-05	0.018	0.004
-3.44e-05	0.018	0.006	-4.8e-06	0.034	0.002	-3.44e-05	0.02	0.01	-1.72e-05	0.018	1.19209e-08	-3.44e-05	0.012	1.19209e-08	-6.88e-05	0.002	0.000999995	-1.72e-05	0.014	1.19209e-08	-1.72e-05	0.018	0.002
-3.4e-05	0.022	5.96047e-09	-4e-06	0.04	0.002	-3.4e-05	0.012	-0.002	-1.7e-05	0.018	-0.004	-3.4e-05	0.016	1.19209e-08	-6.8e-05	-1.49012e-09	-0.001	-1.7e-05	0.014	1.19209e-08	-1.7e-05	0.02	0.002
-3.36e-05	0.02	0.004	-3.2e-06	0.044	0.002	-3.36e-05	0.016	0.006	-1.68e-05	0.018	1.19209e-08	-3.36e-05	0.018	0.004	-6.72e-05	-1.49012e-09	0.003	-1.68e-05	0.014	0.004	-1.68e-05	0.022	0.002
-3.32e-05	0.014	0.002	-2.4e-06	0.05	0.002	-3.32e-05	0.02	0.002	-1.66e-05	0.014	-0.004	-3.32e-05	0.016	1.19209e-08	-6.64e-05	0.002	-0.001	-1.66e-05	0.014	0.004	-1.66e-05	0.02	0.004
-3.28e-05	0.018	0.002	-1.6e-06	0.054	0.004	-3.28e-05	0.016	-0.006	-1.64e-05	0.018	1.19209e-08	-3.28e-05	0.018	0.004	-6.56e-05	-0.006	-0.001	-1.64e-05	0.016	0.004	-1.64e-05	0.018	0.004
-3.24e-05	0.022	0.004	-8e-07	0.062	0.002	-3.24e-05	0.016	0.002	-1.62e-05	0.022	0.012	-3.24e-05	0.018	1.19209e-08	-6.48e-05	-0.002	-0.001	-1.62e-05	0.014	-0.004	-1.62e-05	0.018	0.004
-3.2e-05	0.02	0.002	0	0.06	0.002	-3.2e-05	0.02	-0.002	-1.6e-05	0.02	1.19209e-08	-3.2e-05	0.018	1.19209e-08	-6.4e-05	-1.49012e-09	-0.003	-1.6e-05	0.012	1.19209e-08	-1.6e-05	0.02	0.006
-3.16e-05	0.018	0.002	8e-07	0.068	5.96047e-09	-3.16e-05	0.012	-0.002	-1.58e-05	0.02	1.19209e-08	-3.16e-05	0.02	1.19209e-08	-6.32e-05	-0.004	0.000999995	-1.58e-05	0.016	1.19209e-08	-1.58e-05	0.018	0.006
-3.12e-05	0.02	0.004	1.6e-06	0.07	0.002	-3.12e-05	0.016	0.002	-1.56e-05	0.018	-0.004	-3.12e-05	0.018	1.19209e-08	-6.24e-05	-0.004	-0.003	-1.56e-05	0.016	1.19209e-08	-1.56e-05	0.02	0.002
-3.08e-05	0.016	0.006	2.4e-06	0.074	0.004	-3.08e-05	0.016	0.002	-1.54e-05	0.018	0.004	-3.08e-05	0.018	1.19209e-08	-6.16e-05	-1.49012e-09	-0.003	-1.54e-05	0.016	1.19209e-08	-1.54e-05	0.02	0.004
-3.04e-05	0.012	0.004	3.2e-06	0.08	0.002	-3.04e-05	0.016	-0.002	-1.52e-05	0.018	1.19209e-08	-3.04e-05	0.022	1.19209e-08	-6.08e-05	-0.002	0.000999995	-1.52e-05	0.012	0.004	-1.52e-05	0.018	0.006
-3e-05	0.02	0.002	4e-06	0.08	0.004	-3e-05	0.02	-0.002	-1.5e-05	0.016	1.19209e-08	-3e-05	0.018	1.19209e-08	-6e-05	0.002	-0.003	-1.5e-05	0.014	0.004	-1.5e-05	0.016	0.002
-2.96e-05	0.022	0.006	4.8e-06	0.082	0.002	-2.96e-05	0.02	-0.002	-1.48e-05	0.018	-0.004	-2.96e-05	0.018	1.19209e-08	-5.92e-05	-0.002	-0.001	-1.48e-05	0.016	1.19209e-08	-1.48e-05	0.018	0.004
-2.92e-05	0.016	0.004	5.6e-06	0.084	0.006	-2.92e-05	0.016	-0.002	-1.46e-05	0.02	1.19209e-08	-2.92e-05	0.02	1.19209e-08	-5.84e-05	-1.49012e-09	0.000999995	-1.46e-05	0.018	1.19209e-08	-1.46e-05	0.018	0.004
-2.88e-05	0.02	0.004	6.4e-06	0.086	0.002	-2.88e-05	0.016	0.002	-1.44e-05	0.016	0.008	-2.88e-05	0.02	1.19209e-08	-5.76e-05	0.002	-0.003	-1.44e-05	0.014	1.19209e-08	-1.44e-05	0.02	0.006
-2.84e-05	0.018	0.004	7.2e-06	0.09	0.002	-2.84e-05	0.016	0.006	-1.42e-05	0.02	1.19209e-08	-2.84e-05	0.02	-0.004	-5.68e-05	-0.002	-0.001	-1.42e-05	0.012	0.004	-1.42e-05	0.024	5.96047e-09
-2.8e-05	0.018	0.004	8e-06	0.09	0.004	-2.8e-05	0.02	0.002	-1.4e-05	0.02	1.19209e-08	-2.8e-05	0.02	0.004	-5.6e-05	-1.49012e-09	-0.001	-1.4e-05	0.016	-0.004	-1.4e-05	0.02	0.006
-2.76e-05	0.02	0.004	8.8e-06	0.096	0.002	-2.76e-05	0.012	-0.002	-1.38e-05	0.018	0.008	-2.76e-05	0.018	1.19209e-08	-5.52e-05	-0.002	-0.001	-1.38e-05	0.016	1.19209e-08	-1.38e-05	0.018	0.006
-2.72e-05	0.02	0.004	9.6e-06	0.098	0.002	-2.72e-05	0.024	0.006	-1.36e-05	0.02	1.19209e-08	-2.72e-05	0.018	-0.004	-5.44e-05	0.002	-0.001	-1.36e-05	0.014	1.19209e-08	-1.36e-05	0.016	0.004
-2.68e-05	0.018	0.004	1.04e-05	0.098	0.002	-2.68e-05	0.012	-0.002	-1.34e-05	0.018	0.004	-2.68e-05	0.02	1.19209e-08	-5.36e-05	0.006	-0.003	-1.34e-05	0.016	0.004	-1.34e-05	0.016	0.002
-2.64e-05	0.018	0.002	1.12e-05	0.104	0.002	-2.64e-05	0.016	-0.002	-1.32e-05	0.02	1.19209e-08	-2.64e-05	0.018	1.19209e-08	-5.28e-05	0.008	-0.003	-1.32e-05	0.014	0.004	-1.32e-05	0.018	0.004
-2.6e-05	0.02	0.002	1.2e-05	0.108	5.96047e-09	-2.6e-05	0.016	-0.002	-1.3e-05	0.018	1.19209e-08	-2.6e-05	0.02	1.19209e-08	-5.2e-05	0.02	-0.001	-1.3e-05	0.014	1.19209e-08	-1.3e-05	0.02	0.004
-2.56e-05	0.018	0.002	1.28e-05	0.112	0.002	-2.56e-05	0.02	0.002	-1.28e-05	0.022	0.004	-2.56e-05	0.02	0.004	-5.12e-05	0.022	-0.003	-1.28e-05	0.018	1.19209e-08	-1.28e-05	0.02	0.004
-2.52e-05	0.018	0.002	1.36e-05	0.112	0.004	-2.52e-05	0.012	0.002	-1.26e-05	0.02	0.004	-2.52e-05	0.02	1.19209e-08	-5.04e-05	0.024	0.000999995	-1.26e-05	0.016	-0.004	-1.26e-05	0.02	0.006
-2.48e-05	0.02	0.002	1.44e-05	0.12	0.002	-2.48e-05	0.016	0.002	-1.24e-05	0.016	1.19209e-08	-2.48e-05	0.018	1.19209e-08	-4.96e-05	0.024	-0.003	-1.24e-05	0.018	0.004	-1.24e-05	0.018	0.004
-2.44e-05	0.016	0.004	1.52e-05	0.12	5.96047e-09	-2.44e-05	0.016	-0.002	-1.22e-05	0.018	-0.004	-2.44e-05	0.018	1.19209e-08	-4.88e-05	0.022	0.000999995	-1.22e-05	0.016	0.004	-1.22e-05	0.016	0.004
-2.4e-05	0.016	0.004	1.6e-05	0.12	0.004	-2.4e-05	0.016	-0.006	-1.2e-05	0.02	1.19209e-08	-2.4e-05	0.02	1.19209e-08	-4.8e-05	0.022	-0.001	-1.2e-05	0.014	0.004	-1.2e-05	0.018	0.002
-2.36e-05	0.018	0.002	1.68e-05	0.122	0.004	-2.36e-05	0.016	-0.002	-1.18e-05	0.018	1.19209e-08	-2.36e-05	0.02	0.004	-4.72e-05	0.026	-0.001	-1.18e-05	0.014	1.19209e-08	-1.18e-05	0.02	0.004
-2.32e-05	0.016	0.004	1.76e-05	0.124	0.002	-2.32e-05	0.016	0.002	-1.16e-05	0.018	1.19209e-08	-2.32e-05	0.016	-0.004	-4.64e-05	0.024	-0.001	-1.16e-05	0.016	1.19209e-08	-1.16e-05	0.018	0.004
-2.28e-05	0.02	0.004	1.84e-05	0.128	0.004	-2.28e-05	0.02	0.002	-1.14e-05	0.018	0.004	-2.28e-05	0.016	-0.004	-4.56e-05	0.024	-0.001	-1.14e-05	0.018	0.004	-1.14e-05	0.018	0.004
-2.24e-05	0.018	0.004	1.92e-05	0.128	0.002	-2.24e-05	0.016	-0.002	-1.12e-05	0.016	0.004	-2.24e-05	0.018	0.004	-4.48e-05	0.026	0.000999995	-1.12e-05	0.014	1.19209e-08	-1.12e-05	0.018	0.004
-2.2e-05	0.02	0.004	2e-05	0.128	0.002	-2.2e-05	0.016	0.002	-1.1e-05	0.018	1.19209e-08	-2.2e-05	0.02	1.19209e-08	-4.4e-05	0.022	-0.001	-1.1e-05	0.016	1.19209e-08	-1.1e-05	0.018	0.006
-2.16e-05	0.016	0.004	2.08e-05	0.132	0.004	-2.16e-05	0.016	-0.002	-1.08e-05	0.02	1.19209e-08	-2.16e-05	0.016	0.004	-4.32e-05	0.028	0.000999995	-1.08e-05	0.014	-0.004	-1.08e-05	0.018	0.004
-2.12e-05	0.02	0.004	2.16e-05	0.134	0.004	-2.12e-05	0.016	-0.002	-1.06e-05	0.02	-0.004	-2.12e-05	0.016	1.19209e-08	-4.24e-05	0.024	-0.001	-1.06e-05	0.018	0.004	-1.06e-05	0.02	0.002
-2.08e-05	0.02	-0.002	2.24e-05	0.132	0.002	-2.08e-05	0.016	-0.002	-1.04e-05	0.02	0.004	-2.08e-05	0.018	1.19209e-08	-4.16e-05	0.026	0.000999995	-1.04e-05	0.018	-0.004	-1.04e-05	0.02	0.004
-2.04e-05	0.018	0.004	2.32e-05	0.136	0.004	-2.04e-05	0.016	-0.002	-1.02e-05	0.02	-0.004	-2.04e-05	0.016	-0.004	-4.08e-05	0.022	-0.001	-1.02e-05	0.018	0.004	-1.02e-05	0.018	0.004
-2e-05	0.02	0.002	2.4e-05	0.134	0.004	-2e-05	0.02	0.006	-1e-05	0.02	-0.004	-2e-05	0.018	0.004	-4e-05	0.024	-0.001	-1e-05	0.02	1.19209e-08	-1e-05	0.016	0.004
-1.96e-05	0.022	0.004	2.48e-05	0.134	0.002	-1.96e-05	0.024	-0.006	-9.8e-06	0.02	1.19209e-08	-1.96e-05	0.02	1.19209e-08	-3.92e-05	0.022	-0.001	-9.8e-06	0.018	-0.004	-9.8e-06	0.018	0.004
-1.92e-05	0.016	0.004	2.56e-05	0.134	0.004	-1.92e-05	0.016	-0.002	-9.6e-06	0.022	0.008	-1.92e-05	0.018	-0.004	-3.84e-05	0.02	-0.001	-9.6e-06	0.02	-0.008	-9.6e-06	0.016	0.002
-1.88e-05	0.018	0.004	2.64e-05	0.134	0.004	-1.88e-05	0.012	-0.002	-9.4e-06	0.02	1.19209e-08	-1.88e-05	0.018	0.004	-3.76e-05	0.024	-0.001	-9.4e-06	0.02	1.19209e-08	-9.4e-06	0.022	0.002
-1.84e-05	0.022	0.004	2.72e-05	0.134	0.002	-1.84e-05	0.016	-0.002	-9.2e-06	0.022	1.19209e-08	-1.84e-05	0.018	-0.004	-3.68e-05	0.022	0.000999995	-9.2e-06	0.02	-0.004	-9.2e-06	0.022	0.006
-1.8e-05	0.02	0.004	2.8e-05	0.136	0.002	-1.8e-05	0.016	0.006	-9e-06	0.022	-0.004	-1.8e-05	0.02	-0.004	-3.6e-05	0.024	0.000999995	-9e-06	0.018	-0.004	-9e-06	0.02	0.002
-1.76e-05	0.02	0.004	2.88e-05	0.132	0.002	-1.76e-05	0.02	0.006	-8.8e-06	0.022	-0.004	-1.76e-05	0.018	1.19209e-08	-3.52e-05	0.024	0.000999995	-8.8e-06	0.02	1.19209e-08	-8.8e-06	0.02	0.004
-1.72e-05	0.024	0.004	2.96e-05	0.132	0.004	-1.72e-05	0.02	0.006	-8.6e-06	0.024	0.008	-1.72e-05	0.02	1.19209e-08	-3.44e-05	0.024	0.000999995	-8.6e-06	0.022	1.19209e-08	-8.6e-06	0.016	0.004
-1.68e-05	0.014	0.006	3.04e-05	0.134	0.004	-1.68e-05	0.016	-0.002	-8.4e-06	0.026	1.19209e-08	-1.68e-05	0.016	1.19209e-08	-3.36e-05	0.024	-0.001	-8.4e-06	0.022	1.19209e-08	-8.4e-06	0.016	0.004
-1.64e-05	0.014	0.006	3.12e-05	0.136	0.004	-1.64e-05	0.02	0.002	-8.2e-06	0.024	1.19209e-08	-1.64e-05	0.016	-0.004	-3.28e-05	0.026	-0.001	-8.2e-06	0.024	1.19209e-08	-8.2e-06	0.02	0.004
-1.6e-05	0.022	0.002	3.2e-05	0.134	0.002	-1.6e-05	0.016	-0.002	-8e-06	0.022	-0.016	-1.6e-05	0.016	-0.008	-3.2e-05	0.024	-0.001	-8e-06	0.022	1.19209e-08	-8e-06	0.02	0.004
-1.56e-05	0.022	0.004	3.28e-05	0.14	0.002	-1.56e-05	0.016	-0.002	-7.8e-06	0.022	1.19209e-08	-1.56e-05	0.018	0.004	-3.12e-05	0.024	0.000999995	-7.8e-06	0.022	1.19209e-08	-7.8e-06	0.022	0.002
-1.52e-05	0.02	0.004	3.36e-05	0.132	0.004	-1.52e-05	0.02	-0.006	-7.6e-06	0.024	1.19209e-08	-1.52e-05	0.02	1.19209e-08	-3.04e-05	0.026	-0.003	-7.6e-06	0.022	0.004	-7.6e-06	0.024	0.006
-1.48e-05	0.016	0.004	3.44e-05	0.14	0.002	-1.48e-05	0.016	0.002	-7.4e-06	0.026	0.004	-1.48e-05	0.018	1.19209e-08	-2.96e-05	0.024	-0.001	-7.4e-06	0.026	1.19209e-08	-7.4e-06	0.02	0.004
-1.44e-05	0.02	0.004	3.52e-05	0.138	0.002	-1.44e-05	0.016	-0.002	-7.2e-06	0.026	0.004	-1.44e-05	0.016	1.19209e-08	-2.88e-05	0.024	0.000999995	-7.2e-06	0.026	-0.008	-7.2e-06	0.018	0.004
-1.4e-05	0.018	0.004	3.6e-05	0.138	0.004	-1.4e-05	0.016	-0.002	-7e-06	0.024	1.19209e-08	-1.4e-05	0.018	1.19209e-08	-2.8e-05	0.026	-0.001	-7e-06	0.028	1.19209e-08	-7e-06	0.02	0.002
-1.36e-05	0.02	0.002	3.68e-05	0.136	0.004	-1.36e-05	0.02	0.002	-6.8e-06	0.028	1.19209e-08	-1.36e-05	0.018	0.004	-2.72e-05	0.026	-0.001	-6.8e-06	0.028	1.19209e-08	-6.8e-06	0.022	0.004
-1.32e-05	0.02	0.004	3.76e-05	0.138	0.002	-1.32e-05	0.016	0.002	-6.6e-06	0.03	1.19209e-08	-1.32e-05	0.02	-0.004	-2.64e-05	0.024	-0.001	-6.6e-06	0.03	1.19209e-08	-6.6e-06	0.024	0.004
-1.28e-05	0.018	0.006	3.84e-05	0.136	0.002	-1.28e-05	0.02	0.006	-6.4e-06	0.028	1.19209e-08	-1.28e-05	0.018	1.19209e-08	-2.56e-05	0.022	0.000999995	-6.4e-06	0.03	1.19209e-08	-6.4e-06	0.026	0.004
-1.24e-05	0.018	0.004	3.92e-05	0.14	0.006	-1.24e-05	0.024	-0.002	-6.2e-06	0.028	0.004	-1.24e-05	0.018	1.19209e-08	-2.48e-05	0.024	-0.001	-6.2e-06	0.032	0.004	-6.2e-06	0.022	0.004
-1.2e-05	0.02	0.004	4e-05	0.138	0.002	-1.2e-05	0.016	0.002	-6e-06	0.032	1.19209e-08	-1.2e-05	0.018	1.19209e-08	-2.4e-05	0.022	-0.001	-6e-06	0.032	0.004	-6e-06	0.024	0.006
-1.16e-05	0.022	0.004	4.08e-05	0.14	0.002	-1.16e-05	0.02	0.002	-5.8e-06	0.03	0.004	-1.16e-05	0.018	0.004	-2.32e-05	0.024	-0.001	-5.8e-06	0.032	1.19209e-08	-5.8e-06	0.022	0.004
-1.12e-05	0.022	0.002	4.16e-05	0.138	0.002	-1.12e-05	0.02	0.002	-5.6e-06	0.032	1.19209e-08	-1.12e-05	0.018	0.004	-2.24e-05	0.024	-0.001	-5.6e-06	0.034	1.19209e-08	-5.6e-06	0.026	0.006
-1.08e-05	0.022	0.004	4.24e-05	0.14	0.004	-1.08e-05	0.012	-0.002	-5.4e-06	0.034	1.19209e-08	-1.08e-05	0.018	0.004	-2.16e-05	0.028	-0.001	-5.4e-06	0.032	1.19209e-08	-5.4e-06	0.03	0.002
-1.04e-05	0.018	-0.008	4.32e-05	0.138	0.002	-1.04e-05	0.012	0.002	-5.2e-06	0.036	0.004	-1.04e-05	0.018	1.19209e-08	-2.08e-05	0.024	0.000999995	-5.2e-06	0.036	1.19209e-08	-5.2e-06	0.03	0.004
-1e-05	0.02	-0.008	4.4e-05	0.138	0.004	-1e-05	0.024	0.002	-5e-06	0.034	1.19209e-08	-1e-05	0.016	1.19209e-08	-2e-05	0.026	-0.001	-5e-06	0.036	-0.004	-5e-06	0.03	0.002
-9.6e-06	0.02	-0.008	4.48e-05	0.136	0.002	-9.6e-06	0.016	-0.002	-4.8e-06	0.036	0.004	-9.6e-06	0.016	-0.004	-1.92e-05	0.024	-0.001	-4.8e-06	0.038	1.19209e-08	-4.8e-06	0.028	0.004
-9.2e-06	0.02	-0.006	4.56e-05	0.142	0.002	-9.2e-06	0.02	0.002	-4.6e-06	0.038	1.19209e-08	-9.2e-06	0.018	-0.004	-1.84e-05	0.024	-0.001	-4.6e-06	0.04	1.19209e-08	-4.6e-06	0.03	0.004
-8.8e-06	0.018	-0.006	4.64e-05	0.138	0.002	-8.8e-06	0.02	-0.002	-4.4e-06	0.038	0.004	-8.8e-06	0.02	1.19209e-08	-1.76e-05	0.026	-0.001	-4.4e-06	0.042	1.19209e-08	-4.4e-06	0.032	5.96047e-09
-8.4e-06	0.02	-0.006	4.72e-05	0.144	0.002	-8.4e-06	0.016	0.002	-4.2e-06	0.038	1.19209e-08	-8.4e-06	0.02	1.19209e-08	-1.68e-05	0.022	0.003	-4.2e-06	0.042	-0.004	-4.2e-06	0.034	0.002
-8e-06	0.022	-0.006	4.8e-05	0.138	0.004	-8e-06	0.02	0.002	-4e-06	0.038	-0.004	-8e-06	0.02	1.19209e-08	-1.6e-05	0.026	-0.003	-4e-06	0.042	-0.004	-4e-06	0.034	0.002
-7.6e-06	0.022	-0.004	4.88e-05	0.14	0.004	-7.6e-06	0.024	-0.006	-3.8e-06	0.04	1.19209e-08	-7.6e-06	0.022	-0.004	-1.52e-05	0.026	-0.001	-3.8e-06	0.044	1.19209e-08	-3.8e-06	0.036	0.004
-7.2e-06	0.022	-0.004	4.96e-05	0.142	0.002	-7.2e-06	0.024	0.006	-3.6e-06	0.042	1.19209e-08	-7.2e-06	0.024	1.19209e-08	-1.44e-05	0.026	-0.001	-3.6e-06	0.046	0.008	-3.6e-06	0.038	0.004
-6.8e-06	0.028	-0.006	5.04e-05	0.14	0.002	-6.8e-06	0.028	-0.002	-3.4e-06	0.044	0.004	-6.8e-06	0.02	-0.004	-1.36e-05	0.024	-0.001	-3.4e-06	0.046	1.19209e-08	-3.4e-06	0.036	0.008
-6.4e-06	0.028	-0.006	5.12e-05	0.14	0.002	-6.4e-06	0.032	-0.002	-3.2e-06	0.046	1.19209e-08	-6.4e-06	0.022	1.19209e-08	-1.28e-05	0.026	-0.001	-3.2e-06	0.046	1.19209e-08	-3.2e-06	0.038	0.002
-6e-06	0.028	-0.004	5.2e-05	0.14	0.004	-6e-06	0.032	0.006	-3e-06	0.044	0.004	-6e-06	0.026	1.19209e-08	-1.2e-05	0.028	0.000999995	-3e-06	0.046	1.19209e-08	-3e-06	0.04	0.004
-5.6e-06	0.028	-0.004	5.28e-05	0.144	0.002	-5.6e-06	0.032	-0.002	-2.8e-06	0.046	1.19209e-08	-5.6e-06	0.028	-0.004	-1.12e-05	0.026	-0.001	-2.8e-06	0.052	0.004	-2.8e-06	0.04	0.004
-5.2e-06	0.03	-0.006	5.36e-05	0.142	0.004	-5.2e-06	0.036	-0.002	-2.6e-06	0.046	1.19209e-08	-5.2e-06	0.03	1.19209e-08	-1.04e-05	0.024	0.003	-2.6e-06	0.05	0.004	-2.6e-06	0.042	0.004
-4.8e-06	0.032	-0.006	5.44e-05	0.144	0.002	-4.8e-06	0.032	-0.002	-2.4e-06	0.048	1.19209e-08	-4.8e-06	0.03	-0.008	-9.6e-06	0.032	-0.001	-2.4e-06	0.05	1.19209e-08	-2.4e-06	0.044	0.004
-4.4e-06	0.036	-0.002	5.52e-05	0.142	0.004	-4.4e-06	0.032	-0.002	-2.2e-06	0.048	1.19209e-08	-4.4e-06	0.034	1.19209e-08	-8.8e-06	0.024	-0.001	-2.2e-06	0.052	1.19209e-08	-2.2e-06	0.044	0.004
-4e-06	0.036	-0.004	5.6e-05	0.144	0.004	-4e-06	0.04	-0.006	-2e-06	0.05	-0.008	-4e-06	0.036	1.19209e-08	-8e-06	0.032	-0.001	-2e-06	0.054	0.004	-2e-06	0.044	0.004
-3.6e-06	0.036	-0.004	5.68e-05	0.142	0.004	-3.6e-06	0.04	-0.002	-1.8e-06	0.05	1.19209e-08	-3.6e-06	0.038	-0.004	-7.2e-06	0.032	-0.003	-1.8e-06	0.054	-0.004	-1.8e-06	0.048	0.004
-3.2e-06	0.038	-0.002	5.76e-05	0.142	0.004	-3.2e-06	0.044	-0.002	-1.6e-06	0.052	1.19209e-08	-3.2e-06	0.042	0.004	-6.4e-06	0.032	0.000999995	-1.6e-06	0.058	0.004	-1.6e-06	0.046	0.002
-2.8e-06	0.042	-0.004	5.84e-05	0.142	0.004	-2.8e-06	0.044	-0.002	-1.4e-06	0.054	-0.004	-2.8e-06	0.042	1.19209e-08	-5.6e-06	0.036	-0.001	-1.4e-06	0.056	0.004	-1.4e-06	0.05	0.004
-2.4e-06	0.046	-0.004	5.92e-05	0.14	5.96047e-09	-2.4e-06	0.044	-0.002	-1.2e-06	0.054	0.004	-2.4e-06	0.046	1.19209e-08	-4.8e-06	0.038	-0.001	-1.2e-06	0.058	1.19209e-08	-1.2e-06	0.052	0.004
-2e-06	0.044	-0.002	6e-05	0.144	0.004	-2e-06	0.048	0.002	-1e-06	0.058	1.19209e-08	-2e-06	0.05	1.19209e-08	-4e-06	0.042	0.000999995	-1e-06	0.056	0.004	-1e-06	0.052	0.004
-1.6e-06	0.05	-0.002	6.08e-05	0.144	0.002	-1.6e-06	0.056	-0.002	-8e-07	0.058	-0.004	-1.6e-06	0.05	0.004	-3.2e-06	0.048	-0.003	-8e-07	0.058	-0.008	-8e-07	0.052	0.004
-1.2e-06	0.052	-0.002	6.16e-05	0.146	0.002	-1.2e-06	0.048	-0.002	-6e-07	0.056	1.19209e-08	-1.2e-06	0.054	1.19209e-08	-2.4e-06	0.048	-0.001	-6e-07	0.056	1.19209e-08	-6e-07	0.052	0.002
-8e-07	0.056	0.002	6.24e-05	0.146	0.004	-8e-07	0.052	0.002	-4e-07	0.058	1.19209e-08	-8e-07	0.056	1.19209e-08	-1.6e-06	0.06	0.000999995	-4e-07	0.058	0.004	-4e-07	0.054	0.004
-4e-07	0.056	5.96047e-09	6.32e-05	0.146	0.002	-4e-07	0.056	-0.002	-2e-07	0.062	0.004	-4e-07	0.058	0.004	-8e-07	0.062	-0.001	-2e-07	0.06	0.004	-2e-07	0.056	0.004
0	0.056	-0.004	6.4e-05	0.144	0.002	0	0.06	0.006	0	0.062	-0.004	0	0.06	1.19209e-08	0	0.068	0.000999995	0	0.062	1.19209e-08	0	0.06	0.002
4e-07	0.06	-0.002	6.48e-05	0.142	0.002	4e-07	0.068	-0.002	2e-07	0.066	1.19209e-08	4e-07	0.06	1.19209e-08	8e-07	0.076	-0.001	2e-07	0.064	-0.004	2e-07	0.06	0.004
8e-07	0.062	-0.002	6.56e-05	0.146	0.004	8e-07	0.068	0.002	4e-07	0.066	0.004	8e-07	0.064	-0.004	1.6e-06	0.074	-0.001	4e-07	0.064	0.004	4e-07	0.062	0.002
1.2e-06	0.064	5.96047e-09	6.64e-05	0.146	0.002	1.2e-06	0.072	-0.002	6e-07	0.068	0.004	1.2e-06	0.068	-0.004	2.4e-06	0.084	-0.001	6e-07	0.066	1.19209e-08	6e-07	0.062	0.004
1.6e-06	0.062	-0.002	6.72e-05	0.144	0.002	1.6e-06	0.072	0.002	8e-07	0.064	1.19209e-08	1.6e-06	0.074	1.19209e-08	3.2e-06	0.084	-0.001	8e-07	0.068	1.19209e-08	8e-07	0.066	0.004
2e-06	0.068	5.96047e-09	6.8e-05	0.146	0.004	2e-06	0.076	0.002	1e-06	0.066	1.19209e-08	2e-06	0.074	-0.008	4e-06	0.088	0.000999995	1e-06	0.066	1.19209e-08	1e-06	0.068	0.002
2.4e-06	0.068	5.96047e-09	6.88e-05	0.146	0.004	2.4e-06	0.076	-0.002	1.2e-06	0.068	1.19209e-08	2.4e-06	0.074	0.008	4.8e-06	0.096	0.000999995	1.2e-06	0.066	0.008	1.2e-06	0.07	0.004
2.8e-06	0.068	5.96047e-09	6.96e-05	0.146	0.002	2.8e-06	0.072	-0.002	1.4e-06	0.07	0.004	2.8e-06	0.078	1.19209e-08	5.6e-06	0.094	-0.001	1.4e-06	0.064	-0.008	1.4e-06	0.07	0.004
3.2e-06	0.07	-0.002	7.04e-05	0.146	0.002	3.2e-06	0.076	-0.002	1.6e-06	0.07	1.19209e-08	3.2e-06	0.076	-0.004	6.4e-06	0.098	-0.001	1.6e-06	0.068	0.004	1.6e-06	0.07	0.004
3.6e-06	0.074	5.96047e-09	7.12e-05	0.144	0.002	3.6e-06	0.076	-0.002	1.8e-06	0.072	1.19209e-08	3.6e-06	0.08	-0.004	7.2e-06	0.102	-0.001	1.8e-06	0.068	0.004	1.8e-06	0.07	0.002
4e-06	0.076	5.96047e-09	7.2e-05	0.144	0.002	4e-06	0.08	-0.002	2e-06	0.072	0.008	4e-06	0.078	1.19209e-08	8e-06	0.098	-0.001	2e-06	0.07	1.19209e-08	2e-06	0.072	0.004
4.4e-06	0.074	5.96047e-09	7.28e-05	0.144	0.002	4.4e-06	0.084	-0.002	2.2e-06	0.074	0.004	4.4e-06	0.078	1.19209e-08	8.8e-06	0.102	-0.001	2.2e-06	0.072	1.19209e-08	2.2e-06	0.076	0.002
4.8e-06	0.078	5.96047e-09	7.36e-05	0.142	0.002	4.8e-06	0.084	-0.002	2.4e-06	0.072	1.19209e-08	4.8e-06	0.08	1.19209e-08	9.6e-06	0.106	-0.001	2.4e-06	0.07	1.19209e-08	2.4e-06	0.078	0.002
5.2e-06	0.076	5.96047e-09	7.44e-05	0.144	0.002	5.2e-06	0.084	0.002	2.6e-06	0.07	1.19209e-08	5.2e-06	0.078	1.19209e-08	1.04e-05	0.106	0.003	2.6e-06	0.07	-0.004	2.6e-06	0.082	0.004
5.6e-06	0.08	5.96047e-09	7.52e-05	0.142	0.004	5.6e-06	0.1	0.002	2.8e-06	0.074	1.19209e-08	5.6e-06	0.082	1.19209e-08	1.12e-05	0.116	-0.001	2.8e-06	0.07	1.19209e-08	2.8e-06	0.08	0.002
6e-06	0.082	5.96047e-09	7.6e-05	0.146	0.004	6e-06	0.088	-0.002	3e-06	0.072	1.19209e-08	6e-06	0.08	-0.004	1.2e-05	0.118	-0.001	3e-06	0.07	1.19209e-08	3e-06	0.082	0.004
6.4e-06	0.082	5.96047e-09	7.68e-05	0.144	0.004	6.4e-06	0.084	0.006	3.2e-06	0.074	1.19209e-08	6.4e-06	0.08	1.19209e-08	1.28e-05	0.12	-0.003	3.2e-06	0.074	1.19209e-08	3.2e-06	0.08	0.004
6.8e-06	0.084	5.96047e-09	7.76e-05	0.146	0.002	6.8e-06	0.088	-0.002	3.4e-06	0.074	1.19209e-08	6.8e-06	0.082	1.19209e-08	1.36e-05	0.128	-0.001	3.4e-06	0.074	0.008	3.4e-06	0.082	0.002
7.2e-06	0.084	5.96047e-09	7.84e-05	0.142	-0.002	7.2e-06	0.096	0.002	3.6e-06	0.076	1.19209e-08	7.2e-06	0.084	1.19209e-08	1.44e-05	0.128	-0.001	3.6e-06	0.074	1.19209e-08	3.6e-06	0.084	0.004
7.6e-06	0.08	0.002	7.92e-05	0.144	0.002	7.6e-06	0.092	-0.002	3.8e-06	0.078	1.19209e-08	7.6e-06	0.084	0.004	1.52e-05	0.132	-0.001	3.8e-06	0.074	0.004	3.8e-06	0.084	0.002
8e-06	0.084	0.002	8e-05	0.142	0.002	8e-06	0.096	-0.006	4e-06	0.078	1.19209e-08	8e-06	0.084	1.19209e-08	1.6e-05	0.14	-0.001	4e-06	0.072	1.19209e-08	4e-06	0.086	0.002
8.4e-06	0.09	5.96047e-09	8.08e-05	0.142	0.002	8.4e-06	0.1	-0.002	4.2e-06	0.078	1.19209e-08	8.4e-06	0.084	0.004	1.68e-05	0.136	-0.001	4.2e-06	0.074	-0.008	4.2e-06	0.088	0.004
8.8e-06	0.088	5.96047e-09	8.16e-05	0.14	0.004	8.8e-06	0.1	-0.002	4.4e-06	0.078	1.19209e-08	8.8e-06	0.084	-0.004	1.76e-05	0.142	-0.001	4.4e-06	0.072	1.19209e-08	4.4e-06	0.088	0.002
9.2e-06	0.088	0.002	8.24e-05	0.144	0.002	9.2e-06	0.096	-0.002	4.6e-06	0.08	0.004	9.2e-06	0.086	-0.004	1.84e-05	0.142	-0.001	4.6e-06	0.074	1.19209e-08	4.6e-06	0.088	0.004
9.6e-06	0.092	5.96047e-09	8.32e-05	0.144	0.002	9.6e-06	0.108	0.002	4.8e-06	0.078	-0.004	9.6e-06	0.09	1.19209e-08	1.92e-05	0.146	0.000999995	4.8e-06	0.076	-0.004	4.8e-06	0.088	0.002
1e-05	0.094	0.002	8.4e-05	0.142	0.002	1e-05	0.104	0.002	5e-06	0.078	1.19209e-08	1e-05	0.09	-0.004	2e-05	0.144	-0.001	5e-06	0.074	0.004	5e-06	0.086	0.004
1.04e-05	0.092	5.96047e-09	8.48e-05	0.142	0.002	1.04e-05	0.112	-0.002	5.2e-06	0.08	1.19209e-08	1.04e-05	0.09	1.19209e-08	2.08e-05	0.144	-0.001	5.2e-06	0.076	0.004	5.2e-06	0.086	0.004
1.08e-05	0.096	0.002	8.56e-05	0.14	0.004	1.08e-05	0.112	-0.002	5.4e-06	0.08	-0.004	1.08e-05	0.092	0.004	2.16e-05	0.146	0.000999995	5.4e-06	0.08	1.19209e-08	5.4e-06	0.086	0.004
1.12e-05	0.1	0.002	8.64e-05	0.14	0.002	1.12e-05	0.112	-0.002	5.6e-06	0.08	1.19209e-08	1.12e-05	0.094	1.19209e-08	2.24e-05	0.146	-0.001	5.6e-06	0.076	1.19209e-08	5.6e-06	0.088	0.004
1.16e-05	0.102	5.96047e-09	8.72e-05	0.14	0.004	1.16e-05	0.112	0.002	5.8e-06	0.08	1.19209e-08	1.16e-05	0.094	0.012	2.32e-05	0.148	-0.003	5.8e-06	0.08	1.19209e-08	5.8e-06	0.09	0.004
1.2e-05	0.104	5.96047e-09	8.8e-05	0.144	0.002	1.2e-05	0.112	-0.002	6e-06	0.082	1.19209e-08	1.2e-05	0.096	1.19209e-08	2.4e-05	0.148	-0.001	6e-06	0.078	1.19209e-08	6e-06	0.092	0.004
1.24e-05	0.108	0.002	8.88e-05	0.142	0.002	1.24e-05	0.12	-0.002	6.2e-06	0.084	1.19209e-08	1.24e-05	0.096	0.004	2.48e-05	0.148	-0.001	6.2e-06	0.08	1.19209e-08	6.2e-06	0.09	0.004
1.28e-05	0.11	0.004	8.96e-05	0.144	0.002	1.28e-05	0.116	0.006	6.4e-06	0.084	1.19209e-08	1.28e-05	0.096	1.19209e-08	2.56e-05	0.144	-0.001	6.4e-06	0.078	0.004	6.4e-06	0.09	0.004
1.32e-05	0.11	0.002	9.04e-05	0.142	5.96047e-09	1.32e-05	0.124	-0.002	6.6e-06	0.084	0.008	1.32e-05	0.098	1.19209e-08	2.64e-05	0.146	-0.001	6.6e-06	0.078	1.19209e-08	6.6e-06	0.092	0.004
1.36e-05	0.112	0.002	9.12e-05	0.14	0.004	1.36e-05	0.124	-0.002	6.8e-06	0.08	-0.004	1.36e-05	0.102	1.19209e-08	2.72e-05	0.146	-0.001	6.8e-06	0.078	-0.004	6.8e-06	0.088	0.006
1.4e-05	0.116	5.96047e-09	9.2e-05	0.144	0.004	1.4e-05	0.124	-0.002	7e-06	0.082	1.19209e-08	1.4e-05	0.102	1.19209e-08	2.8e-05	0.15	-0.001	7e-06	0.084	1.19209e-08	7e-06	0.088	0.004
1.44e-05	0.116	0.004	9.28e-05	0.144	0.002	1.44e-05	0.124	-0.002	7.2e-06	0.084	1.19209e-08	1.44e-05	0.104	-0.004	2.88e-05	0.146	0.000999995	7.2e-06	0.084	-0.004	7.2e-06	0.094	0.002
1.48e-05	0.118	0.002	9.36e-05	0.14	0.002	1.48e-05	0.128	-0.002	7.4e-06	0.082	1.19209e-08	1.48e-05	0.106	1.19209e-08	2.96e-05	0.148	-0.001	7.4e-06	0.084	1.19209e-08	7.4e-06	0.092	0.004
1.52e-05	0.12	0.002	9.44e-05	0.144	0.004	1.52e-05	0.136	0.002	7.6e-06	0.084	1.19209e-08	1.52e-05	0.108	1.19209e-08	3.04e-05	0.15	-0.001	7.6e-06	0.084	1.19209e-08	7.6e-06	0.096	0.004
1.56e-05	0.122	0.002	9.52e-05	0.142	0.006	1.56e-05	0.128	0.002	7.8e-06	0.086	1.19209e-08	1.56e-05	0.11	1.19209e-08	3.12e-05	0.144	-0.001	7.8e-06	0.086	1.19209e-08	7.8e-06	0.096	0.004
1.6e-05	0.124	0.002	9.6e-05	0.144	0.004	1.6e-05	0.124	0.002	8e-06	0.084	1.19209e-08	1.6e-05	0.112	1.19209e-08	3.2e-05	0.148	-0.001	8e-06	0.084	1.19209e-08	8e-06	0.094	0.002
1.64e-05	0.126	0.002	9.68e-05	0.144	0.004	1.64e-05	0.128	-0.002	8.2e-06	0.084	1.19209e-08	1.64e-05	0.112	-0.004	3.28e-05	0.144	-0.001	8.2e-06	0.086	1.19209e-08	8.2e-06	0.094	0.004
1.68e-05	0.124	0.004	9.76e-05	0.144	0.002	1.68e-05	0.136	-0.002	8.4e-06	0.084	-0.004	1.68e-05	0.116	1.19209e-08	3.36e-05	0.146	-0.001	8.4e-06	0.09	0.004	8.4e-06	0.09	0.002
1.72e-05	0.126	0.002	9.84e-05	0.142	0.004	1.72e-05	0.132	0.002	8.6e-06	0.084	1.19209e-08	1.72e-05	0.116	-0.004	3.44e-05	0.146	0.000999995	8.6e-06	0.09	1.19209e-08	8.6e-06	0.094	0.006
1.76e-05	0.128	0.002	9.92e-05	0.144	5.96047e-09	1.76e-05	0.136	0.002	8.8e-06	0.084	1.19209e-08	1.76e-05	0.118	-0.008	3.52e-05	0.146	-0.001	8.8e-06	0.09	1.19209e-08	8.8e-06	0.092	0.004
1.8e-05	0.13	0.004	0.0001	0.146	0.004	1.8e-05	0.136	0.006	9e-06	0.088	-0.004	1.8e-05	0.122	-0.004	3.6e-05	0.144	0.000999995	9e-06	0.09	1.19209e-08	9e-06	0.094	0.004
1.84e-05	0.126	0.004	0.0001008	0.146	0.004	1.84e-05	0.14	0.002	9.2e-06	0.086	1.19209e-08	1.84e-05	0.124	1.19209e-08	3.68e-05	0.15	-0.001	9.2e-06	0.092	0.004	9.2e-06	0.096	0.004
1.88e-05	0.128	0.002	0.0001016	0.144	0.002	1.88e-05	0.136	0.002	9.4e-06	0.086	1.19209e-08	1.88e-05	0.124	1.19209e-08	3.76e-05	0.142	-0.001	9.4e-06	0.09	0.004	9.4e-06	0.098	0.004
1.92e-05	0.13	0.002	0.0001024	0.146	0.002	1.92e-05	0.14	-0.002	9.6e-06	0.086	1.19209e-08	1.92e-05	0.126	-0.004	3.84e-05	0.148	-0.001	9.6e-06	0.094	-0.004	9.6e-06	0.098	0.004
1.96e-05	0.13	0.004	0.0001032	0.146	0.002	1.96e-05	0.144	0.002	9.8e-06	0.088	1.19209e-08	1.96e-05	0.126	0.004	3.92e-05	0.146	-0.001	9.8e-06	0.096	1.19209e-08	9.8e-06	0.098	0.004
2e-05	0.128	0.004	0.000104	0.148	0.004	2e-05	0.148	0.006	1e-05	0.088	0.004	2e-05	0.128	-0.008	4e-05	0.142	-0.001	1e-05	0.096	1.19209e-08	1e-05	0.096	0.004
2.04e-05	0.126	0.002	0.0001048	0.15	0.004	2.04e-05	0.144	-0.002	1.02e-05	0.09	1.19209e-08	2.04e-05	0.13	1.19209e-08	4.08e-05	0.146	-0.001	1.02e-05	0.098	1.19209e-08	1.02e-05	0.1	0.004
2.08e-05	0.13	0.004	0.0001056	0.146	0.002	2.08e-05	0.14	0.002	1.04e-05	0.092	1.19209e-08	2.08e-05	0.128	0.008	4.16e-05	0.144	-0.001	1.04e-05	0.102	1.19209e-08	1.04e-05	0.098	0.002
2.12e-05	0.132	0.004	0.0001064	0.148	5.96047e-09	2.12e-05	0.14	0.006	1.06e-05	0.09	-0.004	2.12e-05	0.13	1.19209e-08	4.24e-05	0.142	-0.001	1.06e-05	0.102	1.19209e-08	1.06e-05	0.098	0.004
2.16e-05	0.13	0.004	0.0001072	0.146	0.002	2.16e-05	0.144	-0.002	1.08e-05	0.092	1.19209e-08	2.16e-05	0.13	0.004	4.32e-05	0.148	-0.005	1.08e-05	0.098	-0.004	1.08e-05	0.1	0.002
2.2e-05	0.128	0.002	0.000108	0.146	0.002	2.2e-05	0.144	0.006	1.1e-05	0.092	1.19209e-08	2.2e-05	0.132	0.004	4.4e-05	0.144	0.000999995	1.1e-05	0.1	1.19209e-08	1.1e-05	0.098	0.004
2.24e-05	0.132	0.004	0.0001088	0.146	0.002	2.24e-05	0.144	-0.002	1.12e-05	0.09	1.19209e-08	2.24e-05	0.132	0.004	4.48e-05	0.146	-0.005	1.12e-05	0.102	1.19209e-08	1.12e-05	0.098	0.002
2.28e-05	0.134	0.004	0.0001096	0.146	0.004	2.28e-05	0.144	0.002	1.14e-05	0.092	0.008	2.28e-05	0.134	0.004	4.56e-05	0.144	-0.001	1.14e-05	0.1	1.19209e-08	1.14e-05	0.1	0.006
2.32e-05	0.132	0.004	0.0001104	0.146	5.96047e-09	2.32e-05	0.148	-0.002	1.16e-05	0.092	1.19209e-08	2.32e-05	0.134	-0.004	4.64e-05	0.144	-0.001	1.16e-05	0.106	1.19209e-08	1.16e-05	0.104	0.002
2.36e-05	0.132	0.002	0.0001112	0.148	0.004	2.36e-05	0.144	-0.002	1.18e-05	0.094	1.19209e-08	2.36e-05	0.136	1.19209e-08	4.72e-05	0.144	-0.001	1.18e-05	0.106	1.19209e-08	1.18e-05	0.106	0.002
2.4e-05	0.136	0.002	0.000112	0.148	0.002	2.4e-05	0.144	0.002	1.2e-05	0.094	1.19209e-08	2.4e-05	0.132	1.19209e-08	4.8e-05	0.142	-0.001	1.2e-05	0.106	1.19209e-08	1.2e-05	0.108	0.004
2.44e-05	0.138	0.002	0.0001128	0.148	0.004	2.44e-05	0.148	-0.002	1.22e-05	0.096	1.19209e-08	2.44e-05	0.134	0.004	4.88e-05	0.148	-0.001	1.22e-05	0.106	1.19209e-08	1.22e-05	0.108	0.004
2.48e-05	0.138	0.002	0.0001136	0.146	0.004	2.48e-05	0.144	0.002	1.24e-05	0.096	0.004	2.48e-05	0.136	-0.004	4.96e-05	0.142	0.000999995	1.24e-05	0.108	0.004	1.24e-05	0.108	0.002
2.52e-05	0.138	0.002	0.0001144	0.146	0.002	2.52e-05	0.144	-0.002	1.26e-05	0.098	-0.004	2.52e-05	0.136	0.004	5.04e-05	0.146	-0.001	1.26e-05	0.108	1.19209e-08	1.26e-05	0.108	0.004
2.56e-05	0.136	0.004	0.0001152	0.146	0.002	2.56e-05	0.14	-0.002	1.28e-05	0.098	-0.004	2.56e-05	0.136	0.004	5.12e-05	0.142	0.000999995	1.28e-05	0.11	-0.004	1.28e-05	0.108	0.006
2.6e-05	0.136	0.002	0.000116	0.146	0.002	2.6e-05	0.14	-0.002	1.3e-05	0.1	1.19209e-08	2.6e-05	0.136	0.004	5.2e-05	0.144	-0.001	1.3e-05	0.108	0.004	1.3e-05	0.108	0.002
2.64e-05	0.14	0.004	0.0001168	0.146	0.004	2.64e-05	0.144	0.002	1.32e-05	0.1	1.19209e-08	2.64e-05	0.136	1.19209e-08	5.28e-05	0.148	0.000999995	1.32e-05	0.11	1.19209e-08	1.32e-05	0.112	0.004
2.68e-05	0.144	0.004	0.0001176	0.148	0.002	2.68e-05	0.14	0.006	1.34e-05	0.102	1.19209e-08	2.68e-05	0.136	1.19209e-08	5.36e-05	0.142	-0.001	1.34e-05	0.11	1.19209e-08	1.34e-05	0.11	0.002
2.72e-05	0.136	0.004	0.0001184	0.148	0.004	2.72e-05	0.14	0.002	1.36e-05	0.1	-0.004	2.72e-05	0.138	1.19209e-08	5.44e-05	0.144	0.000999995	1.36e-05	0.112	0.004	1.36e-05	0.112	0.004
2.76e-05	0.136	0.002	0.0001192	0.144	0.004	2.76e-05	0.14	-0.002	1.38e-05	0.102	1.19209e-08	2.76e-05	0.136	-0.004	5.52e-05	0.144	0.000999995	1.38e-05	0.112	-0.004	1.38e-05	0.11	0.004
2.8e-05	0.138	0.002	0.00012	0.148	5.96047e-09	2.8e-05	0.14	-0.002	1.4e-05	0.104	1.19209e-08	2.8e-05	0.138	1.19209e-08	5.6e-05	0.144	-0.001	1.4e-05	0.114	0.004	1.4e-05	0.108	0.002
2.84e-05	0.136	0.002	0.0001208	0.148	0.004	2.84e-05	0.14	0.002	1.42e-05	0.104	-0.004	2.84e-05	0.14	1.19209e-08	5.68e-05	0.144	0.000999995	1.42e-05	0.114	1.19209e-08	1.42e-05	0.114	0.006
2.88e-05	0.138	0.002	0.0001216	0.144	0.004	2.88e-05	0.144	-0.002	1.44e-05	0.104	1.19209e-08	2.88e-05	0.14	0.004	5.76e-05	0.146	-0.001	1.44e-05	0.116	0.004	1.44e-05	0.11	0.006
2.92e-05	0.14	0.004	0.0001224	0.146	5.96047e-09	2.92e-05	0.14	-0.002	1.46e-05	0.106	-0.008	2.92e-05	0.138	-0.004	5.84e-05	0.146	-0.001	1.46e-05	0.116	1.19209e-08	1.46e-05	0.114	0.004
2.96e-05	0.138	0.002	0.0001232	0.144	0.002	2.96e-05	0.144	-0.002	1.48e-05	0.106	1.19209e-08	2.96e-05	0.138	1.19209e-08	5.92e-05	0.148	0.000999995	1.48e-05	0.118	1.19209e-08	1.48e-05	0.116	0.002
3e-05	0.136	0.004	0.000124	0.146	0.004	3e-05	0.144	-0.006	1.5e-05	0.106	-0.004	3e-05	0.14	0.004	6e-05	0.144	-0.001	1.5e-05	0.118	1.19209e-08	1.5e-05	0.116	0.004
3.04e-05	0.136	0.004	0.0001248	0.146	0.002	3.04e-05	0.144	0.002	1.52e-05	0.106	1.19209e-08	3.04e-05	0.142	-0.008	6.08e-05	0.144	-0.003	1.52e-05	0.12	1.19209e-08	1.52e-05	0.116	0.004
3.08e-05	0.138	0.004	0.0001256	0.146	0.002	3.08e-05	0.144	-0.002	1.54e-05	0.106	0.004	3.08e-05	0.144	1.19209e-08	6.16e-05	0.15	-0.001	1.54e-05	0.118	1.19209e-08	1.54e-05	0.116	0.004
3.12e-05	0.138	0.002	0.0001264	0.148	0.002	3.12e-05	0.136	0.002	1.56e-05	0.11	1.19209e-08	3.12e-05	0.142	1.19209e-08	6.24e-05	0.146	-0.001	1.56e-05	0.122	1.19209e-08	1.56e-05	0.112	0.002
3.16e-05	0.138	0.004	0.0001272	0.148	0.002	3.16e-05	0.144	-0.002	1.58e-05	0.108	1.19209e-08	3.16e-05	0.14	0.004	6.32e-05	0.15	-0.003	1.58e-05	0.118	1.19209e-08	1.58e-05	0.114	0.004
3.2e-05	0.134	0.004	0.000128	0.148	-0.014	3.2e-05	0.144	0.002	1.6e-05	0.11	1.19209e-08	3.2e-05	0.14	-0.004	6.4e-05	0.148	-0.003	1.6e-05	0.118	1.19209e-08	1.6e-05	0.114	0.004
3.24e-05	0.134	0.002	0.0001288	0.146	-0.012	3.24e-05	0.148	-0.002	1.62e-05	0.11	1.19209e-08	3.24e-05	0.14	1.19209e-08	6.48e-05	0.15	0.003	1.62e-05	0.12	0.004	1.62e-05	0.116	0.002
3.28e-05	0.138	0.002	0.0001296	0.146	-0.012	3.28e-05	0.144	0.002	1.64e-05	0.112	0.004	3.28e-05	0.144	1.19209e-08	6.56e-05	0.152	-0.001	1.64e-05	0.12	1.19209e-08	1.64e-05	0.116	-0.002
3.32e-05	0.136	0.002	0.0001304	0.148	-0.012	3.32e-05	0.148	0.002	1.66e-05	0.114	-0.004	3.32e-05	0.146	-0.004	6.64e-05	0.148	-0.003	1.66e-05	0.122	1.19209e-08	1.66e-05	0.116	0.002
3.36e-05	0.13	0.004	0.0001312	0.148	-0.01	3.36e-05	0.14	-0.006	1.68e-05	0.116	-0.004	3.36e-05	0.14	1.19209e-08	6.72e-05	0.15	-0.001	1.68e-05	0.122	1.19209e-08	1.68e-05	0.118	0.004
3.4e-05	0.138	0.002	0.000132	0.148	-0.008	3.4e-05	0.14	-0.002	1.7e-05	0.114	-0.004	3.4e-05	0.144	1.19209e-08	6.8e-05	0.15	-0.003	1.7e-05	0.122	1.19209e-08	1.7e-05	0.114	0.004
3.44e-05	0.138	0.004	0.0001328	0.152	-0.008	3.44e-05	0.144	-0.002	1.72e-05	0.114	1.19209e-08	3.44e-05	0.142	1.19209e-08	6.88e-05	0.148	-0.001	1.72e-05	0.124	1.19209e-08	1.72e-05	0.114	0.006
3.48e-05	0.134	0.004	0.0001336	0.148	-0.006	3.48e-05	0.14	-0.002	1.74e-05	0.116	1.19209e-08	3.48e-05	0.144	1.19209e-08	6.96e-05	0.15	-0.001	1.74e-05	0.126	-0.004	1.74e-05	0.116	0.004
3.52e-05	0.132	0.006	0.0001344	0.148	-0.006	3.52e-05	0.144	0.006	1.76e-05	0.116	1.19209e-08	3.52e-05	0.144	-0.004	7.04e-05	0.152	-0.001	1.76e-05	0.124	-0.004	1.76e-05	0.118	0.004
3.56e-05	0.138	0.004	0.0001352	0.152	-0.008	3.56e-05	0.144	-0.002	1.78e-05	0.12	1.19209e-08	3.56e-05	0.14	-0.004	7.12e-05	0.152	-0.001	1.78e-05	0.126	1.19209e-08	1.78e-05	0.118	0.004
3.6e-05	0.136	0.004	0.000136	0.148	-0.004	3.6e-05	0.144	-0.002	1.8e-05	0.12	1.19209e-08	3.6e-05	0.14	1.19209e-08	7.2e-05	0.152	-0.001	1.8e-05	0.126	1.19209e-08	1.8e-05	0.122	0.004
3.64e-05	0.134	0.004	0.0001368	0.15	-0.004	3.64e-05	0.14	0.002	1.82e-05	0.118	1.19209e-08	3.64e-05	0.14	1.19209e-08	7.28e-05	0.152	0.000999995	1.82e-05	0.128	1.19209e-08	1.82e-05	0.12	0.002
3.68e-05	0.138	0.006	0.0001376	0.152	-0.004	3.68e-05	0.14	-0.006	1.84e-05	0.12	1.19209e-08	3.68e-05	0.14	1.19209e-08	7.36e-05	0.15	-0.001	1.84e-05	0.13	0.004	1.84e-05	0.118	0.006
3.72e-05	0.134	0.002	0.0001384	0.15	-0.004	3.72e-05	0.144	-0.002	1.86e-05	0.118	1.19209e-08	3.72e-05	0.14	1.19209e-08	7.44e-05	0.15	-0.001	1.86e-05	0.13	0.004	1.86e-05	0.118	0.004
3.76e-05	0.136	0.002	0.0001392	0.152	-0.006	3.76e-05	0.14	0.002	1.88e-05	0.122	1.19209e-08	3.76e-05	0.14	1.19209e-08	7.52e-05	0.148	-0.001	1.88e-05	0.128	-0.004	1.88e-05	0.118	0.006
3.8e-05	0.14	0.004	0.00014	0.15	-0.004	3.8e-05	0.136	-0.002	1.9e-05	0.12	1.19209e-08	3.8e-05	0.14	1.19209e-08	7.6e-05	0.152	0.000999995	1.9e-05	0.13	1.19209e-08	1.9e-05	0.118	0.002
3.84e-05	0.136	0.004	0.0001408	0.146	-0.004	3.84e-05	0.144	-0.002	1.92e-05	0.12	-0.004	3.84e-05	0.142	1.19209e-08	7.68e-05	0.15	0.000999995	1.92e-05	0.128	1.19209e-08	1.92e-05	0.122	0.004
3.88e-05	0.136	0.006	0.0001416	0.148	-0.002	3.88e-05	0.14	-0.002	1.94e-05	0.122	-0.004	3.88e-05	0.14	1.19209e-08	7.76e-05	0.146	-0.001	1.94e-05	0.128	1.19209e-08	1.94e-05	0.124	0.002
3.92e-05	0.138	0.004	0.0001424	0.146	-0.002	3.92e-05	0.14	-0.002	1.96e-05	0.12	0.004	3.92e-05	0.14	1.19209e-08	7.84e-05	0.152	-0.003	1.96e-05	0.13	0.004	1.96e-05	0.126	0.002
3.96e-05	0.138	0.004	0.0001432	0.15	-0.002	3.96e-05	0.14	-0.002	1.98e-05	0.122	1.19209e-08	3.96e-05	0.14	1.19209e-08	7.92e-05	0.15	0.000999995	1.98e-05	0.13	1.19209e-08	1.98e-05	0.124	0.002
4e-05	0.134	0.002	0.000144	0.148	-0.004	4e-05	0.14	-0.002	2e-05	0.122	1.19209e-08	4e-05	0.138	-0.004	8e-05	0.152	0.000999995	2e-05	0.13	1.19209e-08	2e-05	0.122	0.002
4.04e-05	0.134	0.004	0.0001448	0.148	5.96047e-09	4.04e-05	0.14	0.002	2.02e-05	0.126	-0.004	4.04e-05	0.138	1.19209e-08	8.08e-05	0.148	-0.003	2.02e-05	0.134	1.19209e-08	2.02e-05	0.122	0.006
4.08e-05	0.136	0.004	0.0001456	0.146	-0.006	4.08e-05	0.144	-0.002	2.04e-05	0.126	1.19209e-08	4.08e-05	0.14	1.19209e-08	8.16e-05	0.15	-0.001	2.04e-05	0.136	1.19209e-08	2.04e-05	0.122	0.004
4.12e-05	0.132	0.004	0.0001464	0.148	-0.002	4.12e-05	0.144	-0.006	2.06e-05	0.128	1.19209e-08	4.12e-05	0.14	1.19209e-08	8.24e-05	0.15	-0.001	2.06e-05	0.134	1.19209e-08	2.06e-05	0.124	0.006
4.16e-05	0.136	0.002	0.0001472	0.15	5.96047e-09	4.16e-05	0.14	-0.01	2.08e-05	0.128	-0.008	4.16e-05	0.142	1.19209e-08	8.32e-05	0.152	-0.001	2.08e-05	0.138	1.19209e-08	2.08e-05	0.124	0.004
4.2e-05	0.136	0.004	0.000148	0.148	-0.004	4.2e-05	0.144	-0.002	2.1e-05	0.126	0.004	4.2e-05	0.14	1.19209e-08	8.4e-05	0.152	-0.001	2.1e-05	0.136	0.004	2.1e-05	0.126	0.004
4.24e-05	0.134	0.004	0.0001488	0.146	-0.006	4.24e-05	0.144	-0.002	2.12e-05	0.128	1.19209e-08	4.24e-05	0.144	1.19209e-08	8.48e-05	0.15	-0.001	2.12e-05	0.136	1.19209e-08	2.12e-05	0.126	0.004
4.28e-05	0.134	0.002	0.0001496	0.15	-0.004	4.28e-05	0.136	-0.002	2.14e-05	0.128	1.19209e-08	4.28e-05	0.14	1.19209e-08	8.56e-05	0.15	-0.001	2.14e-05	0.134	1.19209e-08	2.14e-05	0.13	0.002
4.32e-05	0.14	0.002	0.0001504	0.15	-0.004	4.32e-05	0.136	-0.006	2.16e-05	0.132	1.19209e-08	4.32e-05	0.14	0.004	8.64e-05	0.154	0.000999995	2.16e-05	0.132	1.19209e-08	2.16e-05	0.13	0.004
4.36e-05	0.134	0.002	0.0001512	0.148	-0.004	4.36e-05	0.132	-0.006	2.18e-05	0.13	1.19209e-08	4.36e-05	0.14	1.19209e-08	8.72e-05	0.148	-0.001	2.18e-05	0.14	1.19209e-08	2.18e-05	0.13	0.002
4.4e-05	0.134	0.004	0.000152	0.15	-0.002	4.4e-05	0.144	-0.006	2.2e-05	0.134	-0.004	4.4e-05	0.14	-0.004	8.8e-05	0.148	-0.001	2.2e-05	0.136	0.004	2.2e-05	0.126	0.004
4.44e-05	0.136	0.002	0.0001528	0.15	-0.004	4.44e-05	0.14	-0.002	2.22e-05	0.134	1.19209e-08	4.44e-05	0.14	1.19209e-08	8.88e-05	0.152	-0.001	2.22e-05	0.138	0.004	2.22e-05	0.126	0.004
4.48e-05	0.136	0.004	0.0001536	0.15	-0.004	4.48e-05	0.14	-0.006	2.24e-05	0.134	0.008	4.48e-05	0.138	1.19209e-08	8.96e-05	0.148	-0.003	2.24e-05	0.14	1.19209e-08	2.24e-05	0.126	0.004
4.52e-05	0.132	0.002	0.0001544	0.154	-0.002	4.52e-05	0.14	-0.002	2.26e-05	0.132	1.19209e-08	4.52e-05	0.138	1.19209e-08	9.04e-05	0.152	-0.001	2.26e-05	0.138	1.19209e-08	2.26e-05	0.128	0.004
4.56e-05	0.134	0.004	0.0001552	0.152	-0.002	4.56e-05	0.14	-0.006	2.28e-05	0.132	1.19209e-08	4.56e-05	0.144	-0.008	9.12e-05	0.15	-0.001	2.28e-05	0.136	0.004	2.28e-05	0.13	0.002
4.6e-05	0.138	0.002	0.000156	0.152	-0.004	4.6e-05	0.14	-0.006	2.3e-05	0.132	-0.008	4.6e-05	0.144	1.19209e-08	9.2e-05	0.148	-0.001	2.3e-05	0.138	0.004	2.3e-05	0.13	0.004
4.64e-05	0.138	0.004	0.0001568	0.15	-0.002	4.64e-05	0.14	-0.002	2.32e-05	0.128	1.19209e-08	4.64e-05	0.14	-0.004	9.28e-05	0.152	-0.001	2.32e-05	0.138	1.19209e-08	2.32e-05	0.13	0.004
4.68e-05	0.134	0.004	0.0001576	0.154	-0.004	4.68e-05	0.14	-0.002	2.34e-05	0.138	1.19209e-08	4.68e-05	0.14	-0.004	9.36e-05	0.15	-0.001	2.34e-05	0.136	1.19209e-08	2.34e-05	0.13	0.004
4.72e-05	0.13	0.004	0.0001584	0.152	-0.004	4.72e-05	0.14	-0.002	2.36e-05	0.136	1.19209e-08	4.72e-05	0.14	1.19209e-08	9.44e-05	0.15	-0.001	2.36e-05	0.138	1.19209e-08	2.36e-05	0.132	0.004
4.76e-05	0.132	0.002	0.0001592	0.156	-0.002	4.76e-05	0.14	0.006	2.38e-05	0.14	1.19209e-08	4.76e-05	0.142	-0.004	9.52e-05	0.152	-0.001	2.38e-05	0.138	1.19209e-08	2.38e-05	0.132	0.004
4.8e-05	0.138	0.002	0.00016	0.156	-0.016	4.8e-05	0.14	-0.006	2.4e-05	0.138	1.19209e-08	4.8e-05	0.142	0.004	9.6e-05	0.152	-0.001	2.4e-05	0.138	1.19209e-08	2.4e-05	0.132	0.004
4.84e-05	0.138	0.004	0.0001608	0.152	-0.014	4.84e-05	0.144	-0.002	2.42e-05	0.138	-0.004	4.84e-05	0.142	0.004	9.68e-05	0.15	-0.001	2.42e-05	0.138	1.19209e-08	2.42e-05	0.134	0.002
4.88e-05	0.132	0.004	0.0001616	0.152	-0.012	4.88e-05	0.144	-0.002	2.44e-05	0.138	-0.004	4.88e-05	0.14	1.19209e-08	9.76e-05	0.152	-0.001	2.44e-05	0.138	1.19209e-08	2.44e-05	0.134	0.002
4.92e-05	0.13	0.004	0.0001624	0.154	-0.012	4.92e-05	0.144	-0.002	2.46e-05	0.14	1.19209e-08	4.92e-05	0.14	-0.004	9.84e-05	0.15	-0.001	2.46e-05	0.138	1.19209e-08	2.46e-05	0.134	0.004
4.96e-05	0.132	0.004	0.0001632	0.154	-0.012	4.96e-05	0.14	-0.002	2.48e-05	0.138	1.19209e-08	4.96e-05	0.144	1.19209e-08	9.92e-05	0.15	0.000999995	2.48e-05	0.138	1.19209e-08	2.48e-05	0.134	0.004
5e-05	0.134	0.002	0.000164	0.156	-0.012	5e-05	0.14	-0.002	2.5e-05	0.138	-0.004	5e-05	0.144	1.19209e-08	0.0001	0.154	-0.001	2.5e-05	0.138	-0.008	2.5e-05	0.136	0.004
5.04e-05	0.134	0.004	0.0001648	0.152	-0.01	5.04e-05	0.148	-0.002	2.52e-05	0.14	1.19209e-08	5.04e-05	0.142	1.19209e-08	0.0001008	0.148	-0.001	2.52e-05	0.14	0.008	2.52e-05	0.138	0.004
5.08e-05	0.136	0.002	0.0001656	0.154	-0.01	5.08e-05	0.144	-0.002	2.54e-05	0.14	1.19209e-08	5.08e-05	0.14	1.19209e-08	0.0001016	0.154	-0.001	2.54e-05	0.138	0.004	2.54e-05	0.14	0.004
5.12e-05	0.134	0.004	0.0001664	0.152	-0.01	5.12e-05	0.148	0.006	2.56e-05	0.142	1.19209e-08	5.12e-05	0.144	1.19209e-08	0.0001024	0.152	-0.001	2.56e-05	0.14	1.19209e-08	2.56e-05	0.14	0.004
5.16e-05	0.13	0.004	0.0001672	0.156	-0.008	5.16e-05	0.14	0.002	2.58e-05	0.142	-0.004	5.16e-05	0.142	-0.004	0.0001032	0.15	-0.001	2.58e-05	0.14	0.004	2.58e-05	0.138	0.004
5.2e-05	0.134	0.002	0.000168	0.154	-0.012	5.2e-05	0.14	-0.002	2.6e-05	0.142	1.19209e-08	5.2e-05	0.142	1.19209e-08	0.000104	0.156	0.000999995	2.6e-05	0.138	0.004	2.6e-05	0.136	0.004
5.24e-05	0.136	0.004	0.0001688	0.154	-0.008	5.24e-05	0.14	-0.006	2.62e-05	0.142	-0.004	5.24e-05	0.14	0.004	0.0001048	0.15	0.003	2.62e-05	0.138	-0.004	2.62e-05	0.138	0.004
5.28e-05	0.13	0.004	0.0001696	0.154	-0.008	5.28e-05	0.14	0.002	2.64e-05	0.144	1.19209e-08	5.28e-05	0.142	1.19209e-08	0.0001056	0.154	-0.001	2.64e-05	0.138	1.19209e-08	2.64e-05	0.138	0.006
5.32e-05	0.134	0.002	0.0001704	0.154	-0.008	5.32e-05	0.144	-0.006	2.66e-05	0.144	1.19209e-08	5.32e-05	0.142	1.19209e-08	0.0001064	0.152	-0.001	2.66e-05	0.14	1.19209e-08	2.66e-05	0.136	0.004
5.36e-05	0.132	0.002	0.0001712	0.156	-0.008	5.36e-05	0.144	-0.002	2.68e-05	0.146	1.19209e-08	5.36e-05	0.14	1.19209e-08	0.0001072	0.154	-0.003	2.68e-05	0.142	-0.004	2.68e-05	0.138	0.004
5.4e-05	0.13	0.006	0.000172	0.154	-0.022	5.4e-05	0.144	-0.002	2.7e-05	0.144	0.004	5.4e-05	0.142	0.004	0.000108	0.154	-0.001	2.7e-05	0.142	1.19209e-08	2.7e-05	0.138	0.006
5.44e-05	0.132	0.002	0.0001728	0.152	-0.024	5.44e-05	0.144	-0.002	2.72e-05	0.144	1.19209e-08	5.44e-05	0.142	-0.004	0.0001088	0.154	-0.001	2.72e-05	0.14	-0.004	2.72e-05	0.136	0.004
5.48e-05	0.13	0.004	0.0001736	0.152	-0.022	5.48e-05	0.14	0.002	2.74e-05	0.142	0.004	5.48e-05	0.14	1.19209e-08	0.0001096	0.15	0.000999995	2.74e-05	0.142	1.19209e-08	2.74e-05	0.136	0.006
5.52e-05	0.132	0.004	0.0001744	0.154	-0.022	5.52e-05	0.14	0.002	2.76e-05	0.142	1.19209e-08	5.52e-05	0.14	0.008	0.0001104	0.15	-0.003	2.76e-05	0.142	1.19209e-08	2.76e-05	0.136	0.002
5.56e-05	0.136	0.002	0.0001752	0.154	-0.024	5.56e-05	0.144	-0.002	2.78e-05	0.142	1.19209e-08	5.56e-05	0.138	1.19209e-08	0.0001112	0.152	-0.001	2.78e-05	0.14	-0.004	2.78e-05	0.136	0.004
5.6e-05	0.134	0.004	0.000176	0.154	-0.024	5.6e-05	0.136	0.002	2.8e-05	0.142	0.008	5.6e-05	0.138	1.19209e-08	0.000112	0.15	-0.001	2.8e-05	0.142	1.19209e-08	2.8e-05	0.14	0.004
5.64e-05	0.13	0.004	0.0001768	0.156	-0.02	5.64e-05	0.144	-0.002	2.82e-05	0.144	1.19209e-08	5.64e-05	0.138	-0.004	0.0001128	0.15	-0.003	2.82e-05	0.144	-0.004	2.82e-05	0.14	0.004
5.68e-05	0.132	0.004	0.0001776	0.158	-0.038	5.68e-05	0.144	-0.002	2.84e-05	0.146	1.19209e-08	5.68e-05	0.14	0.008	0.0001136	0.148	-0.001	2.84e-05	0.144	1.19209e-08	2.84e-05	0.138	0.004
5.72e-05	0.136	0.006	0.0001784	0.156	-0.04	5.72e-05	0.14	-0.002	2.86e-05	0.146	1.19209e-08	5.72e-05	0.14	0.004	0.0001144	0.152	0.000999995	2.86e-05	0.146	1.19209e-08	2.86e-05	0.138	0.008
5.76e-05	0.134	0.004	0.0001792	0.156	-0.038	5.76e-05	0.148	-0.002	2.88e-05	0.146	-0.004	5.76e-05	0.142	1.19209e-08	0.0001152	0.152	0.000999995	2.88e-05	0.148	0.008	2.88e-05	0.134	0.006
5.8e-05	0.132	5.96047e-09	0.00018	0.154	-0.038	5.8e-05	0.14	-0.002	2.9e-05	0.144	1.19209e-08	5.8e-05	0.142	0.004	0.000116	0.15	-0.005	2.9e-05	0.146	-0.004	2.9e-05	0.136	0.002
5.84e-05	0.134	0.004	0.0001808	0.154	-0.032	5.84e-05	0.14	-0.002	2.92e-05	0.146	1.19209e-08	5.84e-05	0.138	0.004	0.0001168	0.152	-0.001	2.92e-05	0.148	1.19209e-08	2.92e-05	0.134	0.002
5.88e-05	0.136	-0.002	0.0001816	0.158	-0.032	5.88e-05	0.14	-0.006	2.94e-05	0.144	1.19209e-08	5.88e-05	0.14	1.19209e-08	0.0001176	0.152	-0.001	2.94e-05	0.148	1.19209e-08	2.94e-05	0.14	0.002
5.92e-05	0.134	0.004	0.0001824	0.156	-0.028	5.92e-05	0.14	-0.002	2.96e-05	0.144	-0.004	5.92e-05	0.142	1.19209e-08	0.0001184	0.154	-0.001	2.96e-05	0.146	0.008	2.96e-05	0.14	0.004
5.96e-05	0.134	0.004	0.0001832	0.158	-0.028	5.96e-05	0.14	-0.002	2.98e-05	0.144	0.004	5.96e-05	0.142	0.004	0.0001192	0.152	-0.003	2.98e-05	0.146	-0.004	2.98e-05	0.14	0.004
6e-05	0.134	0.004	0.000184	0.16	-0.034	6e-05	0.14	-0.002	3e-05	0.142	1.19209e-08	6e-05	0.142	1.19209e-08	0.00012	0.152	0.000999995	3e-05	0.148	-0.008	3e-05	0.138	0.004
6.04e-05	0.132	0.004	0.0001848	0.16	-0.046	6.04e-05	0.14	-0.006	3.02e-05	0.14	0.004	6.04e-05	0.14	-0.004	0.0001208	0.152	0.000999995	3.02e-05	0.15	1.19209e-08	3.02e-05	0.138	0.006
6.08e-05	0.134	0.002	0.0001856	0.16	-0.042	6.08e-05	0.148	-0.006	3.04e-05	0.142	-0.004	6.08e-05	0.142	-0.004	0.0001216	0.154	-0.001	3.04e-05	0.148	-0.004	3.04e-05	0.14	0.004
6.12e-05	0.136	5.96047e-09	0.0001864	0.162	-0.042	6.12e-05	0.144	-0.002	3.06e-05	0.144	1.19209e-08	6.12e-05	0.142	1.19209e-08	0.0001224	0.156	0.000999995	3.06e-05	0.15	1.19209e-08	3.06e-05	0.14	0.004
6.16e-05	0.136	0.006	0.0001872	0.166	-0.04	6.16e-05	0.144	-0.002	3.08e-05	0.142	1.19209e-08	6.16e-05	0.142	-0.004	0.0001232	0.148	-0.001	3.08e-05	0.15	0.004	3.08e-05	0.14	0.004
6.2e-05	0.134	0.004	0.000188	0.164	-0.038	6.2e-05	0.144	0.002	3.1e-05	0.144	0.004	6.2e-05	0.144	1.19209e-08	0.000124	0.154	-0.001	3.1e-05	0.148	0.004	3.1e-05	0.14	0.004
6.24e-05	0.132	0.004	0.0001888	0.164	-0.042	6.24e-05	0.144	0.002	3.12e-05	0.14	1.19209e-08	6.24e-05	0.146	0.004	0.0001248	0.16	-0.001	3.12e-05	0.15	1.19209e-08	3.12e-05	0.14	0.002
6.28e-05	0.134	0.002	0.0001896	0.168	-0.042	6.28e-05	0.144	-0.002	3.14e-05	0.142	-0.004	6.28e-05	0.144	-0.004	0.0001256	0.154	0.000999995	3.14e-05	0.15	1.19209e-08	3.14e-05	0.14	0.004
6.32e-05	0.132	0.006	0.0001904	0.166	-0.038	6.32e-05	0.14	0.002	3.16e-05	0.14	0.004	6.32e-05	0.142	1.19209e-08	0.0001264	0.152	-0.001	3.16e-05	0.152	-0.004	3.16e-05	0.14	0.004
6.36e-05	0.138	0.002	0.0001912	0.17	-0.04	6.36e-05	0.14	-0.002	3.18e-05	0.142	1.19209e-08	6.36e-05	0.142	1.19209e-08	0.0001272	0.156	0.000999995	3.18e-05	0.15	1.19209e-08	3.18e-05	0.14	0.004
6.4e-05	0.138	0.004	0.000192	0.17	-0.052	6.4e-05	0.14	-0.002	3.2e-05	0.14	1.19209e-08	6.4e-05	0.146	1.19209e-08	0.000128	0.154	-0.001	3.2e-05	0.152	0.004	3.2e-05	0.14	0.006
6.44e-05	0.134	0.004	0.0001928	0.17	-0.046	6.44e-05	0.14	-0.002	3.22e-05	0.14	1.19209e-08	6.44e-05	0.144	1.19209e-08	0.0001288	0.152	0.000999995	3.22e-05	0.15	-0.004	3.22e-05	0.14	0.004
6.48e-05	0.132	0.004	0.0001936	0.172	-0.07	6.48e-05	0.14	0.002	3.24e-05	0.142	1.19209e-08	6.48e-05	0.142	1.19209e-08	0.0001296	0.152	-0.001	3.24e-05	0.15	1.19209e-08	3.24e-05	0.136	0.002
6.52e-05	0.136	0.002	0.0001944	0.174	-0.076	6.52e-05	0.144	0.002	3.26e-05	0.142	0.004	6.52e-05	0.144	0.004	0.0001304	0.148	-0.001	3.26e-05	0.152	1.19209e-08	3.26e-05	0.14	0.004
6.56e-05	0.136	0.006	0.0001952	0.174	-0.076	6.56e-05	0.144	0.006	3.28e-05	0.142	1.19209e-08	6.56e-05	0.144	-0.004	0.0001312	0.152	-0.001	3.28e-05	0.15	1.19209e-08	3.28e-05	0.138	0.002
6.6e-05	0.134	0.004	0.000196	0.174	-0.074	6.6e-05	0.144	-0.002	3.3e-05	0.138	1.19209e-08	6.6e-05	0.144	0.004	0.000132	0.152	-0.001	3.3e-05	0.15	0.004	3.3e-05	0.144	0.002
6.64e-05	0.138	0.004	0.0001968	0.176	-0.066	6.64e-05	0.144	-0.002	3.32e-05	0.142	-0.004	6.64e-05	0.142	1.19209e-08	0.0001328	0.15	-0.001	3.32e-05	0.15	1.19209e-08	3.32e-05	0.146	0.006
6.68e-05	0.136	0.004	0.0001976	0.176	-0.064	6.68e-05	0.144	0.002	3.34e-05	0.142	1.19209e-08	6.68e-05	0.144	-0.004	0.0001336	0.152	-0.003	3.34e-05	0.15	1.19209e-08	3.34e-05	0.142	0.004
6.72e-05	0.136	0.004	0.0001984	0.178	-0.08	6.72e-05	0.144	-0.002	3.36e-05	0.14	1.19209e-08	6.72e-05	0.144	-0.004	0.0001344	0.152	-0.001	3.36e-05	0.152	0.004	3.36e-05	0.138	0.004
6.76e-05	0.136	0.004	0.0001992	0.178	-0.1	6.76e-05	0.14	-0.002	3.38e-05	0.142	1.19209e-08	6.76e-05	0.14	-0.004	0.0001352	0.15	-0.001	3.38e-05	0.152	1.19209e-08	3.38e-05	0.138	0.004
6.8e-05	0.138	0.006	0.0002	0.178	-0.102	6.8e-05	0.148	0.002	3.4e-05	0.142	1.19209e-08	6.8e-05	0.146	-0.004	0.000136	0.152	-0.001	3.4e-05	0.154	1.19209e-08	3.4e-05	0.136	0.004
6.84e-05	0.136	0.004	0.0002008	0.178	-0.106	6.84e-05	0.144	-0.002	3.42e-05	0.142	0.004	6.84e-05	0.148	1.19209e-08	0.0001368	0.152	-0.001	3.42e-05	0.152	0.008	3.42e-05	0.136	0.002
6.88e-05	0.138	0.002	0.0002016	0.178	-0.118	6.88e-05	0.14	0.002	3.44e-05	0.14	0.008	6.88e-05	0.146	1.19209e-08	0.0001376	0.152	-0.001	3.44e-05	0.152	1.19209e-08	3.44e-05	0.14	0.002
6.92e-05	0.136	0.004	0.0002024	0.18	-0.122	6.92e-05	0.14	0.002	3.46e-05	0.142	-0.004	6.92e-05	0.142	1.19209e-08	0.0001384	0.154	-0.001	3.46e-05	0.154	0.004	3.46e-05	0.14	0.004
6.96e-05	0.136	0.004	0.0002032	0.182	-0.17	6.96e-05	0.144	0.002	3.48e-05	0.142	1.19209e-08	6.96e-05	0.142	1.19209e-08	0.0001392	0.152	0.000999995	3.48e-05	0.156	1.19209e-08	3.48e-05	0.142	0.004
7e-05	0.136	0.002	0.000204	0.182	-0.18	7e-05	0.14	0.002	3.5e-05	0.14	1.19209e-08	7e-05	0.144	1.19209e-08	0.00014	0.15	-0.001	3.5e-05	0.156	1.19209e-08	3.5e-05	0.14	0.004
7.04e-05	0.138	0.004	0.0002048	0.182	-0.174	7.04e-05	0.136	0.002	3.52e-05	0.138	0.008	7.04e-05	0.146	1.19209e-08	0.0001408	0.152	-0.001	3.52e-05	0.154	1.19209e-08	3.52e-05	0.142	0.004
7.08e-05	0.138	0.002	0.0002056	0.184	-0.19	7.08e-05	0.14	0.002	3.54e-05	0.14	0.004	7.08e-05	0.146	1.19209e-08	0.0001416	0.152	-0.003	3.54e-05	0.154	1.19209e-08	3.54e-05	0.14	0.002
7.12e-05	0.136	0.002	0.0002064	0.184	-0.204	7.12e-05	0.144	-0.002	3.56e-05	0.14	0.004	7.12e-05	0.142	1.19209e-08	0.0001424	0.15	0.000999995	3.56e-05	0.156	-0.004	3.56e-05	0.138	0.004
7.16e-05	0.136	0.002	0.0002072	0.18	-0.204	7.16e-05	0.144	-0.002	3.58e-05	0.14	1.19209e-08	7.16e-05	0.144	1.19209e-08	0.0001432	0.15	-0.001	3.58e-05	0.156	1.19209e-08	3.58e-05	0.138	0.004
7.2e-05	0.136	0.004	0.000208	0.182	-0.226	7.2e-05	0.14	-0.002	3.6e-05	0.138	1.19209e-08	7.2e-05	0.144	1.19209e-08	0.000144	0.154	-0.001	3.6e-05	0.158	0.004	3.6e-05	0.14	0.004
7.24e-05	0.136	0.004	0.0002088	0.182	-0.25	7.24e-05	0.14	0.002	3.62e-05	0.138	0.004	7.24e-05	0.144	1.19209e-08	0.0001448	0.148	-0.001	3.62e-05	0.156	1.19209e-08	3.62e-05	0.138	0.008
7.28e-05	0.138	0.004	0.0002096	0.182	-0.274	7.28e-05	0.14	0.002	3.64e-05	0.138	1.19209e-08	7.28e-05	0.142	0.004	0.0001456	0.15	-0.003	3.64e-05	0.156	-0.004	3.64e-05	0.138	0.006
7.32e-05	0.136	0.006	0.0002104	0.182	-0.286	7.32e-05	0.136	0.002	3.66e-05	0.138	0.008	7.32e-05	0.142	1.19209e-08	0.0001464	0.15	-0.001	3.66e-05	0.156	1.19209e-08	3.66e-05	0.142	0.002
7.36e-05	0.136	0.004	0.0002112	0.184	-0.282	7.36e-05	0.14	0.002	3.68e-05	0.138	1.19209e-08	7.36e-05	0.144	1.19209e-08	0.0001472	0.15	-0.001	3.68e-05	0.158	1.19209e-08	3.68e-05	0.142	0.004
7.4e-05	0.138	0.002	0.000212	0.182	-0.302	7.4e-05	0.14	0.002	3.7e-05	0.142	1.19209e-08	7.4e-05	0.144	0.004	0.000148	0.15	-0.001	3.7e-05	0.162	-0.004	3.7e-05	0.14	0.002
7.44e-05	0.138	0.004	0.0002128	0.18	-0.308	7.44e-05	0.14	0.002	3.72e-05	0.14	1.19209e-08	7.44e-05	0.142	1.19209e-08	0.0001488	0.152	-0.001	3.72e-05	0.158	-0.004	3.72e-05	0.138	0.004
7.48e-05	0.134	0.006	0.0002136	0.182	-0.342	7.48e-05	0.14	0.006	3.74e-05	0.142	0.004	7.48e-05	0.142	1.19209e-08	0.0001496	0.152	-0.001	3.74e-05	0.16	1.19209e-08	3.74e-05	0.138	0.004
7.52e-05	0.134	0.004	0.0002144	0.184	-0.376	7.52e-05	0.14	0.002	3.76e-05	0.14	1.19209e-08	7.52e-05	0.144	-0.008	0.0001504	0.148	-0.001	3.76e-05	0.156	0.004	3.76e-05	0.14	0.004
7.56e-05	0.138	0.002	0.0002152	0.184	-0.362	7.56e-05	0.14	-0.002	3.78e-05	0.14	0.004	7.56e-05	0.142	-0.004	0.0001512	0.152	-0.001	3.78e-05	0.158	-0.004	3.78e-05	0.138	0.004
7.6e-05	0.136	0.004	0.000216	0.18	-0.368	7.6e-05	0.144	0.002	3.8e-05	0.14	1.19209e-08	7.6e-05	0.144	-0.004	0.000152	0.15	0.000999995	3.8e-05	0.156	1.19209e-08	3.8e-05	0.14	0.004
7.64e-05	0.136	0.004	0.0002168	0.184	-0.376	7.64e-05	0.144	0.006	3.82e-05	0.144	0.004	7.64e-05	0.144	-0.004	0.0001528	0.148	0.000999995	3.82e-05	0.158	1.19209e-08	3.82e-05	0.14	0.004
7.68e-05	0.138	0.006	0.0002176	0.182	-0.37	7.68e-05	0.14	0.002	3.84e-05	0.142	1.19209e-08	7.68e-05	0.144	1.19209e-08	0.0001536	0.152	-0.001	3.84e-05	0.16	-0.004	3.84e-05	0.144	0.004
7.72e-05	0.136	0.004	0.0002184	0.184	-0.376	7.72e-05	0.148	-0.002	3.86e-05	0.142	-0.004	7.72e-05	0.142	-0.004	0.0001544	0.15	-0.001	3.86e-05	0.16	0.004	3.86e-05	0.146	0.002
7.76e-05	0.134	0.004	0.0002192	0.186	-0.36	7.76e-05	0.144	-0.006	3.88e-05	0.14	1.19209e-08	7.76e-05	0.142	-0.004	0.0001552	0.15	-0.001	3.88e-05	0.16	-0.004	3.88e-05	0.144	0.004
7.8e-05	0.136	0.002	0.00022	0.186	-0.348	7.8e-05	0.14	-0.002	3.9e-05	0.14	-0.004	7.8e-05	0.14	1.19209e-08	0.000156	0.152	-0.001	3.9e-05	0.158	0.004	3.9e-05	0.138	0.006
7.84e-05	0.138	0.002	0.0002208	0.182	-0.376	7.84e-05	0.14	-0.002	3.92e-05	0.138	1.19209e-08	7.84e-05	0.142	-0.004	0.0001568	0.15	-0.001	3.92e-05	0.158	0.004	3.92e-05	0.136	0.006
7.88e-05	0.134	0.006	0.0002216	0.184	-0.378	7.88e-05	0.14	0.002	3.94e-05	0.14	1.19209e-08	7.88e-05	0.144	-0.004	0.0001576	0.15	-0.001	3.94e-05	0.158	1.19209e-08	3.94e-05	0.138	0.002
7.92e-05	0.138	5.96047e-09	0.0002224	0.184	-0.412	7.92e-05	0.14	0.002	3.96e-05	0.14	-0.004	7.92e-05	0.144	-0.012	0.0001584	0.15	-0.001	3.96e-05	0.158	1.19209e-08	3.96e-05	0.138	0.002
7.96e-05	0.138	0.004	0.0002232	0.184	-0.41599	7.96e-05	0.14	-0.002	3.98e-05	0.14	0.004	7.96e-05	0.144	-0.008	0.0001592	0.15	-0.001	3.98e-05	0.158	1.19209e-08	3.98e-05	0.142	0.004
8e-05	0.132	0.004	0.000224	0.186	-0.41599	8e-05	0.144	-0.002	4e-05	0.142	1.19209e-08	8e-05	0.144	-0.012	0.00016	0.148	-0.001	4e-05	0.158	1.19209e-08	4e-05	0.14	0.002
8.04e-05	0.136	0.002	0.0002248	0.188	-0.41599	8.04e-05	0.14	0.002	4.02e-05	0.14	1.19209e-08	8.04e-05	0.142	-0.012	0.0001608	0.152	-0.001	4.02e-05	0.158	1.19209e-08	4.02e-05	0.14	0.002
8.08e-05	0.138	0.002	0.0002256	0.186	-0.41599	8.08e-05	0.144	0.006	4.04e-05	0.142	1.19209e-08	8.08e-05	0.144	-0.008	0.0001616	0.15	-0.001	4.04e-05	0.158	0.004	4.04e-05	0.14	0.004
8.12e-05	0.138	0.004	0.0002264	0.184	-0.414	8.12e-05	0.144	0.002	4.06e-05	0.14	1.19209e-08	8.12e-05	0.144	1.19209e-08	0.0001624	0.152	-0.005	4.06e-05	0.16	1.19209e-08	4.06e-05	0.14	0.002
8.16e-05	0.138	0.004	0.0002272	0.186	-0.41599	8.16e-05	0.144	-0.002	4.08e-05	0.14	1.19209e-08	8.16e-05	0.146	1.19209e-08	0.0001632	0.152	0.003	4.08e-05	0.162	1.19209e-08	4.08e-05	0.14	0.002
8.2e-05	0.138	0.004	0.000228	0.186	-0.41599	8.2e-05	0.144	-0.002	4.1e-05	0.138	0.004	8.2e-05	0.148	-0.008	0.000164	0.15	-0.001	4.1e-05	0.16	0.004	4.1e-05	0.142	0.004
8.24e-05	0.136	0.004	0.0002288	0.19	-0.41599	8.24e-05	0.14	0.002	4.12e-05	0.142	1.19209e-08	8.24e-05	0.144	-0.004	0.0001648	0.152	0.000999995	4.12e-05	0.158	-0.004	4.12e-05	0.14	0.002
8.28e-05	0.136	5.96047e-09	0.0002296	0.19	-0.41599	8.28e-05	0.144	0.002	4.14e-05	0.138	0.004	8.28e-05	0.146	-0.004	0.0001656	0.148	0.000999995	4.14e-05	0.156	1.19209e-08	4.14e-05	0.138	0.002
8.32e-05	0.138	0.004	0.0002304	0.192	-0.41599	8.32e-05	0.14	0.002	4.16e-05	0.142	1.19209e-08	8.32e-05	0.142	1.19209e-08	0.0001664	0.156	-0.001	4.16e-05	0.158	1.19209e-08	4.16e-05	0.136	0.004
8.36e-05	0.136	0.006	0.0002312	0.192	-0.41599	8.36e-05	0.144	-0.002	4.18e-05	0.14	-0.004	8.36e-05	0.146	-0.004	0.0001672	0.15	-0.001	4.18e-05	0.158	0.004	4.18e-05	0.136	0.004
8.4e-05	0.134	0.004	0.000232	0.194	-0.41599	8.4e-05	0.14	0.002	4.2e-05	0.14	-0.004	8.4e-05	0.146	-0.008	0.000168	0.154	-0.001	4.2e-05	0.158	1.19209e-08	4.2e-05	0.14	0.002
8.44e-05	0.14	0.004	0.0002328	0.196	-0.41599	8.44e-05	0.14	-0.002	4.22e-05	0.142	1.19209e-08	8.44e-05	0.144	-0.004	0.0001688	0.154	0.000999995	4.22e-05	0.158	0.004	4.22e-05	0.14	0.004
8.48e-05	0.136	0.006	0.0002336	0.196	-0.41599	8.48e-05	0.148	-0.006	4.24e-05	0.14	1.19209e-08	8.48e-05	0.146	-0.008	0.0001696	0.15	-0.001	4.24e-05	0.158	0.008	4.24e-05	0.142	0.004
8.52e-05	0.136	0.004	0.0002344	0.2	-0.41599	8.52e-05	0.144	-0.002	4.26e-05	0.138	1.19209e-08	8.52e-05	0.146	-0.008	0.0001704	0.156	0.000999995	4.26e-05	0.158	0.004	4.26e-05	0.142	0.004
8.56e-05	0.136	0.002	0.0002352	0.198	-0.41599	8.56e-05	0.14	-0.002	4.28e-05	0.138	1.19209e-08	8.56e-05	0.144	-0.004	0.0001712	0.152	-0.001	4.28e-05	0.156	1.19209e-08	4.28e-05	0.14	0.004
8.6e-05	0.138	0.004	0.000236	0.2	-0.41599	8.6e-05	0.14	-0.002	4.3e-05	0.14	0.008	8.6e-05	0.142	-0.004	0.000172	0.154	-0.001	4.3e-05	0.158	-0.004	4.3e-05	0.138	0.002
8.64e-05	0.138	-0.012	0.0002368	0.198	-0.41599	8.64e-05	0.144	0.006	4.32e-05	0.138	1.19209e-08	8.64e-05	0.146	-0.004	0.0001728	0.152	-0.001	4.32e-05	0.158	0.004	4.32e-05	0.136	0.004
8.68e-05	0.138	-0.016	0.0002376	0.196	-0.41599	8.68e-05	0.144	0.002	4.34e-05	0.14	1.19209e-08	8.68e-05	0.146	-0.004	0.0001736	0.158	-0.003	4.34e-05	0.16	1.19209e-08	4.34e-05	0.138	0.004
8.72e-05	0.14	-0.012	0.0002384	0.198	-0.41599	8.72e-05	0.136	0.002	4.36e-05	0.14	-0.004	8.72e-05	0.146	1.19209e-08	0.0001744	0.152	-0.001	4.36e-05	0.156	1.19209e-08	4.36e-05	0.14	0.006
8.76e-05	0.136	-0.012	0.0002392	0.198	-0.41599	8.76e-05	0.14	0.002	4.38e-05	0.14	0.004	8.76e-05	0.144	1.19209e-08	0.0001752	0.15	0.000999995	4.38e-05	0.158	-0.004	4.38e-05	0.14	0.004
8.8e-05	0.134	-0.012	0.00024	0.198	-0.41599	8.8e-05	0.144	-0.002	4.4e-05	0.136	1.19209e-08	8.8e-05	0.144	1.19209e-08	0.000176	0.156	-0.001	4.4e-05	0.156	1.19209e-08	4.4e-05	0.14	0.006
8.84e-05	0.138	-0.012	0.0002408	0.196	-0.41599	8.84e-05	0.14	-0.002	4.42e-05	0.14	1.19209e-08	8.84e-05	0.144	-0.004	0.0001768	0.154	-0.001	4.42e-05	0.156	1.19209e-08	4.42e-05	0.138	0.004
8.88e-05	0.136	-0.012	0.0002416	0.198	-0.406	8.88e-05	0.14	0.002	4.44e-05	0.138	1.19209e-08	8.88e-05	0.144	-0.004	0.0001776	0.154	-0.003	4.44e-05	0.154	1.19209e-08	4.44e-05	0.138	0.004
8.92e-05	0.136	-0.01	0.0002424	0.202	-0.41599	8.92e-05	0.14	-0.002	4.46e-05	0.138	1.19209e-08	8.92e-05	0.142	-0.004	0.0001784	0.156	-0.001	4.46e-05	0.152	-0.004	4.46e-05	0.138	0.004
8.96e-05	0.138	-0.01	0.0002432	0.202	-0.41599	8.96e-05	0.144	0.002	4.48e-05	0.14	0.004	8.96e-05	0.144	-0.008	0.0001792	0.154	-0.001	4.48e-05	0.158	1.19209e-08	4.48e-05	0.142	0.002
9e-05	0.132	-0.012	0.000244	0.2	-0.406	9e-05	0.14	-0.002	4.5e-05	0.138	1.19209e-08	9e-05	0.146	-0.008	0.00018	0.152	-0.001	4.5e-05	0.156	0.004	4.5e-05	0.144	0.006
9.04e-05	0.136	-0.01	0.0002448	0.204	-0.41599	9.04e-05	0.14	-0.002	4.52e-05	0.138	1.19209e-08	9.04e-05	0.144	1.19209e-08	0.0001808	0.154	-0.003	4.52e-05	0.158	0.004	4.52e-05	0.14	0.004
9.08e-05	0.14	-0.01	0.0002456	0.202	-0.406	9.08e-05	0.144	-0.002	4.54e-05	0.14	1.19209e-08	9.08e-05	0.146	-0.004	0.0001816	0.154	-0.001	4.54e-05	0.156	1.19209e-08	4.54e-05	0.14	0.006
9.12e-05	0.14	-0.008	0.0002464	0.202	-0.382	9.12e-05	0.14	-0.002	4.56e-05	0.14	1.19209e-08	9.12e-05	0.146	-0.008	0.0001824	0.156	0.003	4.56e-05	0.156	0.004	4.56e-05	0.138	0.004
9.16e-05	0.136	-0.008	0.0002472	0.204	-0.366	9.16e-05	0.14	0.006	4.58e-05	0.14	1.19209e-08	9.16e-05	0.146	-0.008	0.0001832	0.154	-0.001	4.58e-05	0.154	1.19209e-08	4.58e-05	0.14	0.002
9.2e-05	0.138	-0.008	0.000248	0.204	-0.354	9.2e-05	0.14	0.002	4.6e-05	0.138	1.19209e-08	9.2e-05	0.142	-0.012	0.000184	0.154	-0.003	4.6e-05	0.152	1.19209e-08	4.6e-05	0.14	0.004
9.24e-05	0.14	-0.008	0.0002488	0.206	-0.334	9.24e-05	0.144	0.002	4.62e-05	0.14	1.19209e-08	9.24e-05	0.142	-0.008	0.0001848	0.156	-0.001	4.62e-05	0.158	1.19209e-08	4.62e-05	0.14	0.006
9.28e-05	0.136	-0.006	0.0002496	0.206	-0.322	9.28e-05	0.14	-0.002	4.64e-05	0.136	1.19209e-08	9.28e-05	0.144	-0.012	0.0001856	0.154	-0.003	4.64e-05	0.158	1.19209e-08	4.64e-05	0.14	0.004
9.32e-05	0.14	-0.008	0.0002504	0.208	-0.302	9.32e-05	0.14	0.002	4.66e-05	0.138	-0.004	9.32e-05	0.142	-0.004	0.0001864	0.152	-0.001	4.66e-05	0.156	-0.004	4.66e-05	0.138	0.004
9.36e-05	0.138	-0.008	0.0002512	0.21	-0.282	9.36e-05	0.14	-0.002	4.68e-05	0.136	1.19209e-08	9.36e-05	0.142	-0.012	0.0001872	0.154	-0.001	4.68e-05	0.154	-0.004	4.68e-05	0.138	0.002
9.4e-05	0.136	-0.006	0.000252	0.206	-0.274	9.4e-05	0.14	0.002	4.7e-05	0.138	-0.008	9.4e-05	0.142	-0.012	0.000188	0.152	-0.001	4.7e-05	0.158	1.19209e-08	4.7e-05	0.142	0.004
9.44e-05	0.136	-0.006	0.0002528	0.21	-0.258	9.44e-05	0.14	-0.002	4.72e-05	0.138	1.19209e-08	9.44e-05	0.142	-0.008	0.0001888	0.152	-0.001	4.72e-05	0.154	1.19209e-08	4.72e-05	0.142	0.002
9.48e-05	0.14	-0.006	0.0002536	0.208	-0.254	9.48e-05	0.14	-0.002	4.74e-05	0.138	0.004	9.48e-05	0.144	-0.008	0.0001896	0.156	-0.001	4.74e-05	0.158	1.19209e-08	4.74e-05	0.142	0.006
9.52e-05	0.138	-0.004	0.0002544	0.21	-0.248	9.52e-05	0.14	-0.002	4.76e-05	0.14	1.19209e-08	9.52e-05	0.144	-0.008	0.0001904	0.154	-0.001	4.76e-05	0.156	-0.004	4.76e-05	0.14	0.004
9.56e-05	0.134	-0.006	0.0002552	0.21	-0.256	9.56e-05	0.144	-0.002	4.78e-05	0.14	-0.008	9.56e-05	0.14	-0.016	0.0001912	0.152	-0.001	4.78e-05	0.154	1.19209e-08	4.78e-05	0.14	0.004
9.6e-05	0.14	-0.004	0.000256	0.208	-0.246	9.6e-05	0.144	0.006	4.8e-05	0.142	1.19209e-08	9.6e-05	0.144	-0.008	0.000192	0.158	0.000999995	4.8e-05	0.154	1.19209e-08	4.8e-05	0.142	0.004
9.64e-05	0.142	-0.004	0.0002568	0.208	-0.25	9.64e-05	0.14	0.002	4.82e-05	0.138	1.19209e-08	9.64e-05	0.142	-0.004	0.0001928	0.152	-0.001	4.82e-05	0.156	-0.004	4.82e-05	0.138	0.002
9.68e-05	0.136	-0.004	0.0002576	0.206	-0.24	9.68e-05	0.14	-0.002	4.84e-05	0.14	1.19209e-08	9.68e-05	0.142	-0.008	0.0001936	0.156	-0.001	4.84e-05	0.158	1.19209e-08	4.84e-05	0.14	5.96047e-09
9.72e-05	0.138	-0.002	0.0002584	0.212	-0.218	9.72e-05	0.14	-0.002	4.86e-05	0.14	0.008	9.72e-05	0.14	-0.008	0.0001944	0.152	-0.001	4.86e-05	0.156	-0.004	4.86e-05	0.142	0.002
9.76e-05	0.136	-0.002	0.0002592	0.21	-0.222	9.76e-05	0.144	-0.006	4.88e-05	0.138	1.19209e-08	9.76e-05	0.14	-0.004	0.0001952	0.152	-0.001	4.88e-05	0.156	-0.004	4.88e-05	0.14	0.002
9.8e-05	0.138	-0.004	0.00026	0.21	-0.21	9.8e-05	0.144	0.002	4.9e-05	0.138	1.19209e-08	9.8e-05	0.142	-0.012	0.000196	0.154	-0.001	4.9e-05	0.156	1.19209e-08	4.9e-05	0.14	0.008
9.84e-05	0.138	-0.002	0.0002608	0.208	-0.224	9.84e-05	0.14	0.002	4.92e-05	0.138	1.19209e-08	9.84e-05	0.144	-0.016	0.0001968	0.152	-0.001	4.92e-05	0.154	1.19209e-08	4.92e-05	0.14	0.006
9.88e-05	0.14	0.002	0.0002616	0.212	-0.216	9.88e-05	0.14	0.002	4.94e-05	0.138	-0.008	9.88e-05	0.144	-0.008	0.0001976	0.152	-0.001	4.94e-05	0.154	1.19209e-08	4.94e-05	0.138	0.004
9.92e-05	0.134	0.002	0.0002624	0.21	-0.2	9.92e-05	0.144	-0.006	4.96e-05	0.14	1.19209e-08	9.92e-05	0.144	-0.012	0.0001984	0.152	0.000999995	4.96e-05	0.154	0.004	4.96e-05	0.142	0.004
9.96e-05	0.134	-0.004	0.0002632	0.208	-0.196	9.96e-05	0.136	-0.002	4.98e-05	0.138	-0.004	9.96e-05	0.144	-0.016	0.0001992	0.158	-0.001	4.98e-05	0.156	1.19209e-08	4.98e-05	0.142	0.006
0.0001	0.142	-0.002	0.000264	0.204	-0.186	0.0001	0.14	-0.006	5e-05	0.136	1.19209e-08	0.0001	0.144	-0.016	0.0002	0.154	-0.001	5e-05	0.158	-0.004	5e-05	0.144	0.002
0.0001004	0.138	-0.002	0.0002648	0.206	-0.18	0.0001004	0.14	0.002	5.02e-05	0.138	1.19209e-08	0.0001004	0.142	-0.008	0.0002008	0.156	-0.001	5.02e-05	0.156	1.19209e-08	5.02e-05	0.14	0.004
0.0001008	0.134	-0.002	0.0002656	0.202	-0.174	0.0001008	0.14	-0.002	5.04e-05	0.138	1.19209e-08	0.0001008	0.142	-0.016	0.0002016	0.152	0.000999995	5.04e-05	0.158	1.19209e-08	5.04e-05	0.138	0.004
0.0001012	0.138	-0.002	0.0002664	0.202	-0.162	0.0001012	0.14	0.002	5.06e-05	0.136	-0.004	0.0001012	0.144	-0.016	0.0002024	0.154	-0.003	5.06e-05	0.154	1.19209e-08	5.06e-05	0.14	0.002
0.0001016	0.138	-0.004	0.0002672	0.204	-0.156	0.0001016	0.136	0.002	5.08e-05	0.138	-0.004	0.0001016	0.142	-0.016	0.0002032	0.156	-0.001	5.08e-05	0.154	1.19209e-08	5.08e-05	0.14	0.004
0.000102	0.14	5.96047e-09	0.000268	0.204	-0.148	0.000102	0.14	0.006	5.1e-05	0.136	1.19209e-08	0.000102	0.144	-0.016	0.000204	0.156	-0.001	5.1e-05	0.154	0.004	5.1e-05	0.142	0.004
0.0001024	0.138	-0.004	0.0002688	0.206	-0.148	0.0001024	0.136	0.002	5.12e-05	0.138	-0.004	0.0001024	0.142	-0.012	0.0002048	0.152	-0.001	5.12e-05	0.156	1.19209e-08	5.12e-05	0.142	0.002
0.0001028	0.138	-0.002	0.0002696	0.208	-0.138	0.0001028	0.136	-0.002	5.14e-05	0.14	-0.004	0.0001028	0.144	-0.012	0.0002056	0.152	-0.001	5.14e-05	0.154	0.004	5.14e-05	0.142	0.002
0.0001032	0.134	5.96047e-09	0.0002704	0.21	-0.13	0.0001032	0.136	0.002	5.16e-05	0.138	-0.004	0.0001032	0.142	-0.008	0.0002064	0.156	-0.001	5.16e-05	0.154	1.19209e-08	5.16e-05	0.142	0.004
0.0001036	0.136	5.96047e-09	0.0002712	0.208	-0.124	0.0001036	0.14	0.002	5.18e-05	0.138	1.19209e-08	0.0001036	0.142	-0.008	0.0002072	0.158	-0.001	5.18e-05	0.156	-0.004	5.18e-05	0.144	0.004
0.000104	0.138	5.96047e-09	0.000272	0.212	-0.116	0.000104	0.14	-0.002	5.2e-05	0.138	0.004	0.000104	0.144	-0.008	0.000208	0.154	-0.001	5.2e-05	0.158	1.19209e-08	5.2e-05	0.142	0.002
0.0001044	0.136	5.96047e-09	0.0002728	0.21	-0.124	0.0001044	0.136	0.002	5.22e-05	0.14	0.004	0.0001044	0.144	-0.012	0.0002088	0.156	-0.001	5.22e-05	0.154	0.004	5.22e-05	0.142	0.002
0.0001048	0.138	5.96047e-09	0.0002736	0.21	-0.118	0.0001048	0.144	-0.002	5.24e-05	0.138	1.19209e-08	0.0001048	0.144	-0.008	0.0002096	0.154	-0.001	5.24e-05	0.156	0.004	5.24e-05	0.142	0.004
0.0001052	0.138	5.96047e-09	0.0002744	0.214	-0.12	0.0001052	0.14	0.002	5.26e-05	0.138	0.004	0.0001052	0.142	-0.016	0.0002104	0.158	-0.001	5.26e-05	0.154	1.19209e-08	5.26e-05	0.14	0.004
0.0001056	0.136	0.002	0.0002752	0.214	-0.128	0.0001056	0.136	0.006	5.28e-05	0.134	0.004	0.0001056	0.142	-0.008	0.0002112	0.158	-0.003	5.28e-05	0.154	-0.004	5.28e-05	0.142	0.004
0.000106	0.136	5.96047e-09	0.000276	0.218	-0.126	0.000106	0.14	0.002	5.3e-05	0.14	-0.004	0.000106	0.142	-0.012	0.000212	0.154	-0.003	5.3e-05	0.152	-0.004	5.3e-05	0.142	0.006
0.0001064	0.14	5.96047e-09	0.0002768	0.218	-0.136	0.0001064	0.14	-0.006	5.32e-05	0.138	1.19209e-08	0.0001064	0.144	-0.012	0.0002128	0.158	0.000999995	5.32e-05	0.152	-0.004	5.32e-05	0.14	0.006
0.0001068	0.136	5.96047e-09	0.0002776	0.216	-0.132	0.0001068	0.14	-0.002	5.34e-05	0.138	0.004	0.0001068	0.142	-0.016	0.0002136	0.152	-0.001	5.34e-05	0.152	-0.004	5.34e-05	0.14	0.002
0.0001072	0.136	5.96047e-09	0.0002784	0.22	-0.138	0.0001072	0.136	-0.002	5.36e-05	0.14	0.004	0.0001072	0.144	-0.016	0.0002144	0.154	0.000999995	5.36e-05	0.154	-0.004	5.36e-05	0.144	0.002
0.0001076	0.138	5.96047e-09	0.0002792	0.224	-0.13	0.0001076	0.14	-0.002	5.38e-05	0.136	0.004	0.0001076	0.14	-0.012	0.0002152	0.156	-0.001	5.38e-05	0.152	1.19209e-08	5.38e-05	0.144	-0.01
0.000108	0.134	5.96047e-09	0.00028	0.226	-0.124	0.000108	0.136	0.002	5.4e-05	0.138	1.19209e-08	0.000108	0.144	-0.008	0.000216	0.158	-0.001	5.4e-05	0.154	-0.004	5.4e-05	0.146	-0.008
0.0001084	0.132	5.96047e-09	0.0002808	0.226	-0.116	0.0001084	0.14	-0.006	5.42e-05	0.138	1.19209e-08	0.0001084	0.146	-0.012	0.0002168	0.152	0.000999995	5.42e-05	0.152	-0.004	5.42e-05	0.146	-0.004
0.0001088	0.134	5.96047e-09	0.0002816	0.228	-0.11	0.0001088	0.14	-0.002	5.44e-05	0.138	1.19209e-08	0.0001088	0.142	-0.012	0.0002176	0.158	-0.001	5.44e-05	0.154	-0.004	5.44e-05	0.144	-0.006
0.0001092	0.136	0.002	0.0002824	0.23	-0.102	0.0001092	0.14	-0.002	5.46e-05	0.136	1.19209e-08	0.0001092	0.146	-0.008	0.0002184	0.152	-0.001	5.46e-05	0.152	0.004	5.46e-05	0.142	-0.006
0.0001096	0.136	5.96047e-09	0.0002832	0.23	-0.096	0.0001096	0.14	-0.002	5.48e-05	0.136	1.19209e-08	0.0001096	0.146	-0.004	0.0002192	0.156	-0.001	5.48e-05	0.154	-0.004	5.48e-05	0.144	-0.008
0.00011	0.136	0.002	0.000284	0.228	-0.092	0.00011	0.14	0.002	5.5e-05	0.138	-0.004	0.00011	0.148	-0.008	0.00022	0.158	-0.001	5.5e-05	0.152	1.19209e-08	5.5e-05	0.144	-0.004
0.0001104	0.136	5.96047e-09	0.0002848	0.232	-0.086	0.0001104	0.14	0.002	5.52e-05	0.138	1.19209e-08	0.0001104	0.146	-0.012	0.0002208	0.154	-0.001	5.52e-05	0.152	0.004	5.52e-05	0.142	-0.006
0.0001108	0.138	0.002	0.0002856	0.232	-0.092	0.0001108	0.14	-0.002	5.54e-05	0.136	0.004	0.0001108	0.148	1.19209e-08	0.0002216	0.154	-0.001	5.54e-05	0.15	-0.004	5.54e-05	0.142	-0.006
0.0001112	0.136	0.002	0.0002864	0.23	-0.088	0.0001112	0.136	0.002	5.56e-05	0.138	1.19209e-08	0.0001112	0.152	-0.008	0.0002224	0.154	-0.001	5.56e-05	0.152	0.004	5.56e-05	0.14	-0.004
0.0001116	0.138	0.002	0.0002872	0.23	-0.102	0.0001116	0.136	0.006	5.58e-05	0.138	1.19209e-08	0.0001116	0.15	-0.012	0.0002232	0.154	-0.001	5.58e-05	0.15	-0.004	5.58e-05	0.144	-0.002
0.000112	0.136	5.96047e-09	0.000288	0.226	-0.096	0.000112	0.136	0.002	5.6e-05	0.138	1.19209e-08	0.000112	0.146	-0.008	0.000224	0.152	-0.001	5.6e-05	0.154	-0.004	5.6e-05	0.146	-0.006
0.0001124	0.136	5.96047e-09	0.0002888	0.226	-0.102	0.0001124	0.14	-0.006	5.62e-05	0.136	0.004	0.0001124	0.15	-0.012	0.0002248	0.156	-0.001	5.62e-05	0.15	-0.004	5.62e-05	0.146	-0.01
0.0001128	0.134	0.002	0.0002896	0.224	-0.098	0.0001128	0.14	0.002	5.64e-05	0.14	1.19209e-08	0.0001128	0.148	-0.004	0.0002256	0.154	-0.001	5.64e-05	0.156	1.19209e-08	5.64e-05	0.144	-0.004
0.0001132	0.134	0.002	0.0002904	0.222	-0.092	0.0001132	0.136	0.002	5.66e-05	0.138	0.004	0.0001132	0.146	-0.004	0.0002264	0.154	-0.001	5.66e-05	0.156	1.19209e-08	5.66e-05	0.144	-0.006
0.0001136	0.138	0.002	0.0002912	0.22	-0.086	0.0001136	0.14	0.002	5.68e-05	0.138	0.004	0.0001136	0.148	-0.004	0.0002272	0.156	0.000999995	5.68e-05	0.15	1.19209e-08	5.68e-05	0.142	-0.006
0.000114	0.138	5.96047e-09	0.000292	0.22	-0.084	0.000114	0.14	0.002	5.7e-05	0.138	0.004	0.000114	0.15	-0.004	0.000228	0.152	-0.001	5.7e-05	0.154	1.19209e-08	5.7e-05	0.138	-0.004
0.0001144	0.138	5.96047e-09	0.0002928	0.22	-0.076	0.0001144	0.136	-0.006	5.72e-05	0.138	1.19209e-08	0.0001144	0.15	-0.004	0.0002288	0.156	-0.001	5.72e-05	0.152	-0.004	5.72e-05	0.14	-0.004
0.0001148	0.14	0.002	0.0002936	0.218	-0.072	0.0001148	0.14	0.002	5.74e-05	0.136	1.19209e-08	0.0001148	0.148	-0.008	0.0002296	0.154	-0.001	5.74e-05	0.152	1.19209e-08	5.74e-05	0.144	-0.002
0.0001152	0.138	5.96047e-09	0.0002944	0.218	-0.066	0.0001152	0.14	-0.002	5.76e-05	0.138	1.19209e-08	0.0001152	0.15	-0.008	0.0002304	0.152	-0.001	5.76e-05	0.154	-0.004	5.76e-05	0.144	-0.006
0.0001156	0.142	0.002	0.0002952	0.218	-0.064	0.0001156	0.14	-0.002	5.78e-05	0.138	-0.004	0.0001156	0.15	1.19209e-08	0.0002312	0.156	0.000999995	5.78e-05	0.154	-0.004	5.78e-05	0.142	-0.002
0.000116	0.138	0.004	0.000296	0.218	-0.062	0.000116	0.144	-0.002	5.8e-05	0.138	1.19209e-08	0.000116	0.15	-0.008	0.000232	0.156	-0.001	5.8e-05	0.154	-0.004	5.8e-05	0.142	-0.004
0.0001164	0.138	5.96047e-09	0.0002968	0.216	-0.078	0.0001164	0.144	0.006	5.82e-05	0.138	0.004	0.0001164	0.148	-0.016	0.0002328	0.156	-0.001	5.82e-05	0.154	1.19209e-08	5.82e-05	0.142	-0.004
0.0001168	0.14	0.002	0.0002976	0.216	-0.074	0.0001168	0.14	-0.002	5.84e-05	0.14	1.19209e-08	0.0001168	0.148	-0.008	0.0002336	0.156	0.000999995	5.84e-05	0.154	1.19209e-08	5.84e-05	0.142	-0.002
0.0001172	0.14	0.002	0.0002984	0.214	-0.068	0.0001172	0.136	-0.002	5.86e-05	0.14	1.19209e-08	0.0001172	0.148	-0.008	0.0002344	0.154	-0.003	5.86e-05	0.152	-0.004	5.86e-05	0.144	-0.006
0.0001176	0.14	0.004	0.0002992	0.218	-0.066	0.0001176	0.14	0.006	5.88e-05	0.142	0.004	0.0001176	0.15	-0.028	0.0002352	0.156	-0.001	5.88e-05	0.154	-0.008	5.88e-05	0.146	-0.006
0.000118	0.14	0.002	0.0003	0.222	-0.07	0.000118	0.144	-0.002	5.9e-05	0.138	-0.008	0.000118	0.152	-0.028	0.000236	0.154	-0.001	5.9e-05	0.154	1.19209e-08	5.9e-05	0.146	0.002
0.0001184	0.138	5.96047e-09				0.0001184	0.14	-0.002	5.92e-05	0.138	-0.004	0.0001184	0.15	-0.032	0.0002368	0.156	-0.001	5.92e-05	0.154	1.19209e-08	5.92e-05	0.142	-0.004
0.0001188	0.14	0.002				0.0001188	0.136	-0.002	5.94e-05	0.138	-0.004	0.0001188	0.15	-0.036	0.0002376	0.154	-0.003	5.94e-05	0.152	-0.004	5.94e-05	0.142	-0.002
0.0001192	0.14	5.96047e-09				0.0001192	0.136	-0.002	5.96e-05	0.14	-0.008	0.0001192	0.152	-0.028	0.0002384	0.154	-0.003	5.96e-05	0.154	1.19209e-08	5.96e-05	0.144	-0.004
0.0001196	0.14	0.004				0.0001196	0.14	0.002	5.98e-05	0.138	-0.008	0.0001196	0.148	-0.028	0.0002392	0.154	0.000999995	5.98e-05	0.152	-0.008	5.98e-05	0.138	-0.002
0.00012	0.138	0.004				0.00012	0.136	0.002	6e-05	0.14	-0.008	0.00012	0.15	-0.024	0.00024	0.152	-0.001	6e-05	0.154	-0.004	6e-05	0.144	-0.004
0.0001204	0.138	0.002				0.0001204	0.14	0.002	6.02e-05	0.138	-0.004	0.0001204	0.148	-0.028	0.0002408	0.156	-0.001	6.02e-05	0.152	1.19209e-08	6.02e-05	0.146	-0.002
0.0001208	0.14	0.002				0.0001208	0.14	-0.006	6.04e-05	0.138	-0.008	0.0001208	0.152	-0.024	0.0002416	0.156	-0.001	6.04e-05	0.154	1.19209e-08	6.04e-05	0.146	-0.004
0.0001212	0.138	0.002				0.0001212	0.144	-0.002	6.06e-05	0.138	-0.012	0.0001212	0.15	-0.02	0.0002424	0.152	-0.003	6.06e-05	0.154	-0.016	6.06e-05	0.146	-0.002
0.0001216	0.138	5.96047e-09				0.0001216	0.144	-0.002	6.08e-05	0.14	-0.004	0.0001216	0.15	-0.012	0.0002432	0.154	-0.001	6.08e-05	0.154	-0.024	6.08e-05	0.146	-0.002
0.000122	0.14	0.004				0.000122	0.14	0.002	6.1e-05	0.138	-0.008	0.000122	0.154	-0.024	0.000244	0.152	-0.001	6.1e-05	0.152	-0.02	6.1e-05	0.146	-0.002
0.0001224	0.14	0.002				0.0001224	0.14	-0.002	6.12e-05	0.136	-0.008	0.0001224	0.152	-0.028	0.0002448	0.156	-0.003	6.12e-05	0.154	-0.02	6.12e-05	0.146	-0.004
0.0001228	0.14	0.004				0.0001228	0.14	0.002	6.14e-05	0.14	-0.008	0.0001228	0.152	-0.036	0.0002456	0.156	0.000999995	6.14e-05	0.152	-0.02	6.14e-05	0.146	5.96047e-09
0.0001232	0.138	0.002				0.0001232	0.14	-0.002	6.16e-05	0.14	-0.008	0.0001232	0.154	-0.028	0.0002464	0.152	0.000999995	6.16e-05	0.152	-0.024	6.16e-05	0.146	5.96047e-09
0.0001236	0.142	0.002				0.0001236	0.144	0.002	6.18e-05	0.138	-0.004	0.0001236	0.154	-0.032	0.0002472	0.158	-0.001	6.18e-05	0.152	-0.028	6.18e-05	0.146	5.96047e-09
0.000124	0.142	0.002				0.000124	0.14	-0.002	6.2e-05	0.138	-0.012	0.000124	0.156	-0.032	0.000248	0.154	-0.001	6.2e-05	0.156	-0.024	6.2e-05	0.146	-0.002
0.0001244	0.138	0.004				0.0001244	0.14	-0.002	6.22e-05	0.14	1.19209e-08	0.0001244	0.156	-0.028	0.0002488	0.152	-0.001	6.22e-05	0.154	-0.02	6.22e-05	0.146	-0.002
0.0001248	0.14	0.004				0.0001248	0.144	0.002	6.24e-05	0.142	-0.004	0.0001248	0.154	-0.024	0.0002496	0.15	-0.001	6.24e-05	0.154	-0.016	6.24e-05	0.146	-0.002
0.0001252	0.138	0.002				0.0001252	0.14	0.002	6.26e-05	0.138	-0.008	0.0001252	0.158	-0.028	0.0002504	0.154	-0.001	6.26e-05	0.152	-0.02	6.26e-05	0.144	-0.002
0.0001256	0.14	0.004				0.0001256	0.144	0.002	6.28e-05	0.142	-0.012	0.0001256	0.158	-0.032	0.0002512	0.152	-0.001	6.28e-05	0.156	-0.008	6.28e-05	0.146	-0.002
0.000126	0.142	0.004				0.000126	0.144	0.002	6.3e-05	0.136	-0.004	0.000126	0.156	-0.028	0.000252	0.15	0.000999995	6.3e-05	0.154	-0.02	6.3e-05	0.142	5.96047e-09
0.0001264	0.136	0.002				0.0001264	0.136	0.002	6.32e-05	0.14	-0.008	0.0001264	0.16	-0.028	0.0002528	0.156	-0.001	6.32e-05	0.152	-0.016	6.32e-05	0.142	5.96047e-09
0.0001268	0.138	0.002				0.0001268	0.14	-0.002	6.34e-05	0.138	1.19209e-08	0.0001268	0.16	-0.04	0.0002536	0.15	-0.001	6.34e-05	0.154	-0.012	6.34e-05	0.144	-0.004
0.0001272	0.138	0.002				0.0001272	0.132	0.006	6.36e-05	0.142	1.19209e-08	0.0001272	0.158	-0.036	0.0002544	0.154	-0.001	6.36e-05	0.156	-0.02	6.36e-05	0.146	-0.002
0.0001276	0.138	0.002				0.0001276	0.14	0.006	6.38e-05	0.142	-0.004	0.0001276	0.158	-0.036	0.0002552	0.154	-0.001	6.38e-05	0.154	-0.032	6.38e-05	0.148	-0.002
0.000128	0.14	0.004				0.000128	0.136	-0.002	6.4e-05	0.142	-0.004	0.000128	0.158	-0.048	0.000256	0.154	-0.003	6.4e-05	0.154	-0.024	6.4e-05	0.148	-0.004
0.0001284	0.138	5.96047e-09				0.0001284	0.136	-0.002	6.42e-05	0.142	-0.008	0.0001284	0.158	-0.044	0.0002568	0.156	-0.001	6.42e-05	0.154	-0.032	6.42e-05	0.148	5.96047e-09
0.0001288	0.138	0.002				0.0001288	0.144	-0.002	6.44e-05	0.142	1.19209e-08	0.0001288	0.16	-0.052	0.0002576	0.152	-0.001	6.44e-05	0.152	-0.028	6.44e-05	0.146	-0.004
0.0001292	0.136	0.004				0.0001292	0.14	-0.002	6.46e-05	0.142	-0.008	0.0001292	0.158	-0.04	0.0002584	0.152	-0.003	6.46e-05	0.152	-0.024	6.46e-05	0.144	5.96047e-09
0.0001296	0.136	0.004				0.0001296	0.136	0.002	6.48e-05	0.144	1.19209e-08	0.0001296	0.16	-0.04	0.0002592	0.152	-0.001	6.48e-05	0.154	-0.028	6.48e-05	0.144	5.96047e-09
0.00013	0.138	0.004				0.00013	0.136	0.002	6.5e-05	0.142	-0.008	0.00013	0.158	-0.04	0.00026	0.154	-0.003	6.5e-05	0.156	-0.024	6.5e-05	0.144	5.96047e-09
0.0001304	0.142	0.002				0.0001304	0.14	-0.002	6.52e-05	0.142	-0.004	0.0001304	0.162	-0.044	0.0002608	0.154	-0.001	6.52e-05	0.156	-0.02	6.52e-05	0.146	-0.002
0.0001308	0.14	0.002				0.0001308	0.14	0.006	6.54e-05	0.142	-0.008	0.0001308	0.16	-0.044	0.0002616	0.154	-0.001	6.54e-05	0.156	-0.04	6.54e-05	0.144	5.96047e-09
0.0001312	0.142	0.004				0.0001312	0.136	-0.002	6.56e-05	0.142	1.19209e-08	0.0001312	0.16	-0.044	0.0002624	0.156	0.000999995	6.56e-05	0.156	-0.048	6.56e-05	0.144	-0.002
0.0001316	0.136	0.002				0.0001316	0.14	-0.002	6.58e-05	0.14	-0.004	0.0001316	0.162	-0.044	0.0002632	0.154	-0.001	6.58e-05	0.154	-0.052	6.58e-05	0.148	5.96047e-09
0.000132	0.138	0.004				0.000132	0.144	0.002	6.6e-05	0.142	-0.004	0.000132	0.162	-0.044	0.000264	0.154	0.000999995	6.6e-05	0.154	-0.052	6.6e-05	0.146	0.002
0.0001324	0.138	0.006				0.0001324	0.14	0.006	6.62e-05	0.14	1.19209e-08	0.0001324	0.164	-0.044	0.0002648	0.158	-0.001	6.62e-05	0.154	-0.06	6.62e-05	0.146	5.96047e-09
0.0001328	0.14	0.004				0.0001328	0.144	0.002	6.64e-05	0.138	-0.008	0.0001328	0.162	-0.04	0.0002656	0.156	-0.001	6.64e-05	0.154	-0.064	6.64e-05	0.148	5.96047e-09
0.0001332	0.142	0.004				0.0001332	0.136	-0.002	6.66e-05	0.14	1.19209e-08	0.0001332	0.16	-0.04	0.0002664	0.156	-0.003	6.66e-05	0.152	-0.064	6.66e-05	0.148	5.96047e-09
0.0001336	0.14	0.004				0.0001336	0.14	-0.002	6.68e-05	0.142	-0.004	0.0001336	0.164	-0.04	0.0002672	0.154	-0.001	6.68e-05	0.156	-0.064	6.68e-05	0.148	0.002
0.000134	0.14	0.004				0.000134	0.14	0.002	6.7e-05	0.14	-0.004	0.000134	0.164	-0.044	0.000268	0.156	0.003	6.7e-05	0.156	-0.064	6.7e-05	0.146	5.96047e-09
0.0001344	0.14	0.004				0.0001344	0.14	-0.002	6.72e-05	0.142	1.19209e-08	0.0001344	0.166	-0.036	0.0002688	0.156	-0.001	6.72e-05	0.156	-0.06	6.72e-05	0.146	5.96047e-09
0.0001348	0.142	0.004				0.0001348	0.144	-0.002	6.74e-05	0.142	-0.004	0.0001348	0.166	-0.036	0.0002696	0.154	0.000999995	6.74e-05	0.154	-0.072	6.74e-05	0.144	5.96047e-09
0.0001352	0.138	0.002				0.0001352	0.14	0.006	6.76e-05	0.142	-0.008	0.0001352	0.168	-0.04	0.0002704	0.152	-0.001	6.76e-05	0.156	-0.064	6.76e-05	0.144	5.96047e-09
0.0001356	0.138	5.96047e-09				0.0001356	0.136	0.002	6.78e-05	0.14	-0.004	0.0001356	0.168	-0.036	0.0002712	0.154	-0.001	6.78e-05	0.156	-0.06	6.78e-05	0.148	5.96047e-09
0.000136	0.138	0.004				0.000136	0.136	0.006	6.8e-05	0.14	1.19209e-08	0.000136	0.166	-0.036	0.000272	0.152	-0.001	6.8e-05	0.156	-0.06	6.8e-05	0.148	0.002
0.0001364	0.14	0.004				0.0001364	0.136	0.002	6.82e-05	0.138	-0.008	0.0001364	0.17	-0.04	0.0002728	0.152	-0.003	6.82e-05	0.154	-0.068	6.82e-05	0.146	0.002
0.0001368	0.138	0.002				0.0001368	0.144	0.002	6.84e-05	0.14	1.19209e-08	0.0001368	0.168	-0.032	0.0002736	0.152	-0.001	6.84e-05	0.158	-0.076	6.84e-05	0.146	5.96047e-09
0.0001372	0.14	0.002				0.0001372	0.136	-0.002	6.86e-05	0.142	-0.004	0.0001372	0.166	-0.044	0.0002744	0.154	-0.003	6.86e-05	0.156	-0.084	6.86e-05	0.148	0.002
0.0001376	0.136	0.004				0.0001376	0.144	-0.006	6.88e-05	0.138	1.19209e-08	0.0001376	0.168	-0.036	0.0002752	0.154	-0.001	6.88e-05	0.154	-0.076	6.88e-05	0.148	5.96047e-09
0.000138	0.136	0.004				0.000138	0.14	0.006	6.9e-05	0.14	-0.008	0.000138	0.17	-0.04	0.000276	0.15	-0.003	6.9e-05	0.154	-0.076	6.9e-05	0.146	5.96047e-09
0.0001384	0.138	0.002				0.0001384	0.14	0.006	6.92e-05	0.14	-0.004	0.0001384	0.172	-0.048	0.0002768	0.154	-0.001	6.92e-05	0.154	-0.08	6.92e-05	0.146	0.002
0.0001388	0.14	0.004				0.0001388	0.14	-0.002	6.94e-05	0.14	-0.004	0.0001388	0.174	-0.048	0.0002776	0.152	0.000999995	6.94e-05	0.154	-0.068	6.94e-05	0.146	5.96047e-09
0.0001392	0.136	0.004				0.0001392	0.14	-0.006	6.96e-05	0.138	-0.008	0.0001392	0.172	-0.06	0.0002784	0.152	-0.001	6.96e-05	0.154	-0.072	6.96e-05	0.148	0.002
0.0001396	0.14	0.006				0.0001396	0.14	-0.002	6.98e-05	0.138	-0.004	0.0001396	0.172	-0.052	0.0002792	0.154	-0.001	6.98e-05	0.154	-0.076	6.98e-05	0.148	5.96047e-09
0.00014	0.138	0.002				0.00014	0.14	-0.002	7e-05	0.138	1.19209e-08	0.00014	0.174	-0.048	0.00028	0.15	-0.001	7e-05	0.154	-0.072	7e-05	0.148	5.96047e-09
0.0001404	0.136	0.004				0.0001404	0.14	-0.002	7.02e-05	0.136	1.19209e-08	0.0001404	0.176	-0.072	0.0002808	0.154	-0.001	7.02e-05	0.156	-0.076	7.02e-05	0.148	5.96047e-09
0.0001408	0.14	0.002				0.0001408	0.14	0.006	7.04e-05	0.138	-0.012	0.0001408	0.176	-0.088	0.0002816	0.152	-0.001	7.04e-05	0.156	-0.072	7.04e-05	0.146	5.96047e-09
0.0001412	0.142	0.004				0.0001412	0.144	0.006	7.06e-05	0.136	1.19209e-08	0.0001412	0.176	-0.096	0.0002824	0.152	-0.001	7.06e-05	0.156	-0.076	7.06e-05	0.146	0.002
0.0001416	0.136	0.004				0.0001416	0.14	0.006	7.08e-05	0.136	1.19209e-08	0.0001416	0.176	-0.124	0.0002832	0.152	-0.001	7.08e-05	0.156	-0.068	7.08e-05	0.146	0.002
0.000142	0.134	0.004				0.000142	0.144	0.002	7.1e-05	0.14	-0.004	0.000142	0.178	-0.116	0.000284	0.154	-0.001	7.1e-05	0.156	-0.068	7.1e-05	0.146	5.96047e-09
0.0001424	0.14	0.002				0.0001424	0.144	-0.002	7.12e-05	0.138	-0.004	0.0001424	0.176	-0.132	0.0002848	0.154	0.000999995	7.12e-05	0.156	-0.072	7.12e-05	0.144	5.96047e-09
0.0001428	0.14	0.002				0.0001428	0.14	-0.006	7.14e-05	0.138	-0.004	0.0001428	0.178	-0.144	0.0002856	0.15	-0.001	7.14e-05	0.158	-0.064	7.14e-05	0.146	0.002
0.0001432	0.134	0.002				0.0001432	0.14	-0.002	7.16e-05	0.138	1.19209e-08	0.0001432	0.176	-0.144	0.0002864	0.154	0.000999995	7.16e-05	0.156	-0.068	7.16e-05	0.146	0.002
0.0001436	0.138	0.006				0.0001436	0.14	-0.002	7.18e-05	0.138	-0.004	0.0001436	0.176	-0.18	0.0002872	0.152	0.000999995	7.18e-05	0.156	-0.076	7.18e-05	0.148	5.96047e-09
0.000144	0.138	0.004				0.000144	0.148	0.002	7.2e-05	0.14	1.19209e-08	0.000144	0.174	-0.172	0.000288	0.154	0.000999995	7.2e-05	0.156	-0.072	7.2e-05	0.148	0.002
0.0001444	0.136	0.004				0.0001444	0.144	-0.002	7.22e-05	0.138	1.19209e-08	0.0001444	0.174	-0.176	0.0002888	0.152	-0.001	7.22e-05	0.154	-0.072	7.22e-05	0.146	5.96047e-09
0.0001448	0.14	0.004				0.0001448	0.14	0.002	7.24e-05	0.14	1.19209e-08	0.0001448	0.172	-0.168	0.0002896	0.156	-0.001	7.24e-05	0.156	-0.068	7.24e-05	0.146	0.002
0.0001452	0.134	0.004				0.0001452	0.14	-0.002	7.26e-05	0.14	-0.004	0.0001452	0.172	-0.184	0.0002904	0.154	-0.001	7.26e-05	0.154	-0.076	7.26e-05	0.144	5.96047e-09
0.0001456	0.134	0.004				0.0001456	0.144	0.002	7.28e-05	0.138	0.004	0.0001456	0.174	-0.2	0.0002912	0.156	-0.001	7.28e-05	0.158	-0.068	7.28e-05	0.146	5.96047e-09
0.000146	0.138	0.002				0.000146	0.148	-0.002	7.3e-05	0.138	1.19209e-08	0.000146	0.174	-0.2	0.000292	0.158	-0.001	7.3e-05	0.156	-0.064	7.3e-05	0.144	5.96047e-09
0.0001464	0.138	0.004				0.0001464	0.144	0.002	7.32e-05	0.136	1.19209e-08	0.0001464	0.176	-0.196	0.0002928	0.156	-0.001	7.32e-05	0.156	-0.064	7.32e-05	0.144	0.002
0.0001468	0.136	0.004				0.0001468	0.14	-0.002	7.34e-05	0.136	-0.004	0.0001468	0.174	-0.188	0.0002936	0.158	-0.001	7.34e-05	0.156	-0.064	7.34e-05	0.144	0.004
0.0001472	0.134	0.004				0.0001472	0.136	-0.002	7.36e-05	0.134	-0.004	0.0001472	0.172	-0.192	0.0002944	0.156	0.000999995	7.36e-05	0.156	-0.068	7.36e-05	0.142	5.96047e-09
0.0001476	0.138	0.006				0.0001476	0.136	-0.002	7.38e-05	0.136	-0.004	0.0001476	0.174	-0.192	0.0002952	0.158	-0.003	7.38e-05	0.158	-0.064	7.38e-05	0.144	0.004
0.000148	0.136	0.006				0.000148	0.144	-0.006	7.4e-05	0.138	0.004	0.000148	0.174	-0.208	0.000296	0.154	-0.001	7.4e-05	0.158	-0.076	7.4e-05	0.144	0.002
0.0001484	0.138	0.002				0.0001484	0.14	-0.002	7.42e-05	0.138	-0.004	0.0001484	0.178	-0.22	0.0002968	0.156	-0.003	7.42e-05	0.156	-0.076	7.42e-05	0.146	0.002
0.0001488	0.14	0.004				0.0001488	0.136	-0.002	7.44e-05	0.138	-0.004	0.0001488	0.178	-0.212	0.0002976	0.156	-0.003	7.44e-05	0.158	-0.076	7.44e-05	0.144	5.96047e-09
0.0001492	0.138	0.004				0.0001492	0.136	-0.002	7.46e-05	0.138	1.19209e-08	0.0001492	0.178	-0.252	0.0002984	0.15	0.000999995	7.46e-05	0.156	-0.068	7.46e-05	0.144	5.96047e-09
0.0001496	0.136	5.96047e-09				0.0001496	0.14	-0.002	7.48e-05	0.136	-0.004	0.0001496	0.174	-0.268	0.0002992	0.156	-0.003	7.48e-05	0.156	-0.076	7.48e-05	0.142	0.002
0.00015	0.14	0.002				0.00015	0.14	0.002	7.5e-05	0.136	1.19209e-08	0.00015	0.178	-0.28	0.0003	0.152	-0.001	7.5e-05	0.158	-0.072	7.5e-05	0.144	0.002
0.0001504	0.138	0.006				0.0001504	0.14	0.002	7.52e-05	0.136	1.19209e-08	0.0001504	0.178	-0.268	0.0003008	0.156	-0.001	7.52e-05	0.158	-0.068	7.52e-05	0.142	0.002
0.0001508	0.138	0.004				0.0001508	0.144	-0.002	7.54e-05	0.136	1.19209e-08	0.0001508	0.18	-0.276	0.0003016	0.158	-0.001	7.54e-05	0.156	-0.064	7.54e-05	0.142	5.96047e-09
0.0001512	0.14	0.004				0.0001512	0.144	-0.002	7.56e-05	0.136	1.19209e-08	0.0001512	0.18	-0.264	0.0003024	0.154	-0.001	7.56e-05	0.158	-0.068	7.56e-05	0.142	5.96047e-09
0.0001516	0.14	0.004				0.0001516	0.14	0.006	7.58e-05	0.142	1.19209e-08	0.0001516	0.178	-0.268	0.0003032	0.156	0.000999995	7.58e-05	0.16	-0.064	7.58e-05	0.144	5.96047e-09
0.000152	0.134	0.002				0.000152	0.144	0.002	7.6e-05	0.138	1.19209e-08	0.000152	0.18	-0.26	0.000304	0.156	-0.001	7.6e-05	0.16	-0.068	7.6e-05	0.144	0.006
0.0001524	0.138	0.004				0.0001524	0.14	0.002	7.62e-05	0.142	-0.004	0.0001524	0.18	-0.256	0.0003048	0.154	-0.001	7.62e-05	0.16	-0.072	7.62e-05	0.142	0.004
0.0001528	0.142	0.006				0.0001528	0.14	-0.006	7.64e-05	0.142	1.19209e-08	0.0001528	0.18	-0.256	0.0003056	0.158	-0.001	7.64e-05	0.156	-0.068	7.64e-05	0.144	5.96047e-09
0.0001532	0.138	0.006				0.0001532	0.144	-0.002	7.66e-05	0.142	1.19209e-08	0.0001532	0.176	-0.244	0.0003064	0.154	-0.001	7.66e-05	0.158	-0.068	7.66e-05	0.144	0.002
0.0001536	0.14	0.002				0.0001536	0.14	-0.006	7.68e-05	0.14	1.19209e-08	0.0001536	0.176	-0.264	0.0003072	0.154	0.000999995	7.68e-05	0.158	-0.064	7.68e-05	0.14	5.96047e-09
0.000154	0.14	0.006				0.000154	0.14	-0.002	7.7e-05	0.14	-0.004	0.000154	0.176	-0.26	0.000308	0.154	-0.001	7.7e-05	0.158	-0.064	7.7e-05	0.142	5.96047e-09
0.0001544	0.138	0.006				0.0001544	0.14	0.006	7.72e-05	0.134	-0.004	0.0001544	0.18	-0.264	0.0003088	0.156	-0.001	7.72e-05	0.16	-0.076	7.72e-05	0.146	0.002
0.0001548	0.14	0.004				0.0001548	0.14	0.002	7.74e-05	0.136	0.004	0.0001548	0.176	-0.256	0.0003096	0.156	0.000999995	7.74e-05	0.158	-0.08	7.74e-05	0.144	5.96047e-09
0.0001552	0.138	0.004				0.0001552	0.144	-0.002	7.76e-05	0.14	1.19209e-08	0.0001552	0.174	-0.256	0.0003104	0.156	-0.001	7.76e-05	0.16	-0.068	7.76e-05	0.144	0.002
0.0001556	0.136	0.006				0.0001556	0.144	0.006	7.78e-05	0.138	1.19209e-08	0.0001556	0.174	-0.256	0.0003112	0.154	-0.001	7.78e-05	0.162	-0.08	7.78e-05	0.144	0.004
0.000156	0.134	0.004				0.000156	0.14	0.002	7.8e-05	0.14	1.19209e-08	0.000156	0.174	-0.288	0.000312	0.154	-0.001	7.8e-05	0.16	-0.076	7.8e-05	0.144	0.002
0.0001564	0.142	0.002				0.0001564	0.14	0.002	7.82e-05	0.142	-0.004	0.0001564	0.176	-0.28	0.0003128	0.158	-0.001	7.82e-05	0.16	-0.072	7.82e-05	0.142	0.002
0.0001568	0.138	0.006				0.0001568	0.14	0.002	7.84e-05	0.138	1.19209e-08	0.0001568	0.174	-0.276	0.0003136	0.158	0.000999995	7.84e-05	0.16	-0.068	7.84e-05	0.14	0.002
0.0001572	0.136	0.004				0.0001572	0.14	0.002	7.86e-05	0.138	-0.004	0.0001572	0.176	-0.292	0.0003144	0.154	-0.001	7.86e-05	0.16	-0.076	7.86e-05	0.142	0.002
0.0001576	0.14	0.002				0.0001576	0.144	0.002	7.88e-05	0.14	-0.004	0.0001576	0.174	-0.28	0.0003152	0.158	-0.003	7.88e-05	0.158	-0.08	7.88e-05	0.142	0.002
0.000158	0.144	0.004				0.000158	0.14	-0.002	7.9e-05	0.14	1.19209e-08	0.000158	0.174	-0.28	0.000316	0.154	0.000999995	7.9e-05	0.162	-0.08	7.9e-05	0.144	0.004
0.0001584	0.136	5.96047e-09				0.0001584	0.14	0.002	7.92e-05	0.14	-0.004	0.0001584	0.174	-0.28	0.0003168	0.156	-0.001	7.92e-05	0.158	-0.076	7.92e-05	0.146	5.96047e-09
0.0001588	0.138	0.004				0.0001588	0.144	0.002	7.94e-05	0.138	1.19209e-08	0.0001588	0.176	-0.268	0.0003176	0.152	-0.001	7.94e-05	0.16	-0.076	7.94e-05	0.146	0.002
0.0001592	0.142	0.004				0.0001592	0.136	0.002	7.96e-05	0.138	1.19209e-08	0.0001592	0.176	-0.264	0.0003184	0.152	-0.001	7.96e-05	0.162	-0.092	7.96e-05	0.142	0.002
0.0001596	0.138	0.004				0.0001596	0.144	0.002	7.98e-05	0.14	1.19209e-08	0.0001596	0.176	-0.268	0.0003192	0.156	-0.001	7.98e-05	0.162	-0.088	7.98e-05	0.142	0.002
0.00016	0.138	0.004				0.00016	0.144	-0.006	8e-05	0.138	0.004	0.00016	0.176	-0.26	0.00032	0.154	-0.001	8e-05	0.16	-0.08	8e-05	0.144	0.002
0.0001604	0.14	0.006				0.0001604	0.144	-0.002	8.02e-05	0.138	1.19209e-08	0.0001604	0.174	-0.256	0.0003208	0.156	-0.001	8.02e-05	0.162	-0.076	8.02e-05	0.14	0.004
0.0001608	0.138	0.004				0.0001608	0.144	0.002	8.04e-05	0.14	-0.004	0.0001608	0.176	-0.28	0.0003216	0.156	-0.005	8.04e-05	0.162	-0.08	8.04e-05	0.142	0.002
0.0001612	0.138	0.004				0.0001612	0.14	0.002	8.06e-05	0.14	0.004	0.0001612	0.174	-0.276	0.0003224	0.156	0.000999995	8.06e-05	0.164	-0.096	8.06e-05	0.142	0.002
0.0001616	0.142	0.004				0.0001616	0.136	-0.006	8.08e-05	0.142	0.004	0.0001616	0.176	-0.264	0.0003232	0.158	0.000999995	8.08e-05	0.164	-0.096	8.08e-05	0.142	0.002
0.000162	0.14	0.006				0.000162	0.14	0.002	8.1e-05	0.14	-0.004	0.000162	0.176	-0.264	0.000324	0.158	-0.001	8.1e-05	0.162	-0.088	8.1e-05	0.142	0.004
0.0001624	0.138	0.004				0.0001624	0.144	0.002	8.12e-05	0.14	-0.012	0.0001624	0.176	-0.268	0.0003248	0.156	-0.001	8.12e-05	0.164	-0.092	8.12e-05	0.144	0.002
0.0001628	0.14	5.96047e-09				0.0001628	0.136	-0.002	8.14e-05	0.14	-0.004	0.0001628	0.174	-0.256	0.0003256	0.154	-0.001	8.14e-05	0.164	-0.112	8.14e-05	0.144	0.004
0.0001632	0.14	0.004				0.0001632	0.14	-0.002	8.16e-05	0.14	-0.004	0.0001632	0.172	-0.268	0.0003264	0.158	-0.001	8.16e-05	0.162	-0.104	8.16e-05	0.142	0.002
0.0001636	0.14	0.002				0.0001636	0.14	-0.002	8.18e-05	0.142	-0.012	0.0001636	0.174	-0.268	0.0003272	0.156	-0.003	8.18e-05	0.164	-0.108	8.18e-05	0.144	0.002
0.000164	0.142	0.004				0.000164	0.14	0.002	8.2e-05	0.14	-0.008	0.000164	0.174	-0.28	0.000328	0.158	-0.001	8.2e-05	0.162	-0.108	8.2e-05	0.144	0.002
0.0001644	0.138	0.004				0.0001644	0.14	0.002	8.22e-05	0.138	-0.004	0.0001644	0.172	-0.28	0.0003288	0.158	0.000999995	8.22e-05	0.164	-0.108	8.22e-05	0.144	0.002
0.0001648	0.14	0.006				0.0001648	0.148	-0.006	8.24e-05	0.142	-0.004	0.0001648	0.174	-0.284	0.0003296	0.158	-0.001	8.24e-05	0.164	-0.108	8.24e-05	0.142	0.002
0.0001652	0.14	0.002				0.0001652	0.14	0.002	8.26e-05	0.14	-0.004	0.0001652	0.174	-0.268	0.0003304	0.16	-0.001	8.26e-05	0.164	-0.108	8.26e-05	0.142	0.002
0.0001656	0.14	0.006				0.0001656	0.14	0.006	8.28e-05	0.138	-0.004	0.0001656	0.174	-0.272	0.0003312	0.16	-0.001	8.28e-05	0.166	-0.116	8.28e-05	0.142	5.96047e-09
0.000166	0.138	0.002				0.000166	0.136	-0.002	8.3e-05	0.138	-0.016	0.000166	0.172	-0.26	0.000332	0.158	-0.001	8.3e-05	0.166	-0.128	8.3e-05	0.142	0.002
0.0001664	0.142	0.004				0.0001664	0.144	-0.006	8.32e-05	0.142	-0.008	0.0001664	0.174	-0.268	0.0003328	0.158	-0.001	8.32e-05	0.168	-0.12	8.32e-05	0.144	0.002
0.0001668	0.14	0.002				0.0001668	0.14	-0.002	8.34e-05	0.144	-0.012	0.0001668	0.172	-0.276	0.0003336	0.16	-0.003	8.34e-05	0.168	-0.132	8.34e-05	0.144	0.002
0.0001672	0.138	0.006				0.0001672	0.14	0.002	8.36e-05	0.14	-0.012	0.0001672	0.174	-0.292	0.0003344	0.16	-0.001	8.36e-05	0.168	-0.144	8.36e-05	0.142	0.002
0.0001676	0.138	0.004				0.0001676	0.14	0.002	8.38e-05	0.142	-0.004	0.0001676	0.176	-0.284	0.0003352	0.162	-0.001	8.38e-05	0.168	-0.16	8.38e-05	0.14	0.004
0.000168	0.14	0.004				0.000168	0.14	-0.002	8.4e-05	0.14	-0.008	0.000168	0.172	-0.296	0.000336	0.16	0.000999995	8.4e-05	0.168	-0.156	8.4e-05	0.14	0.002
0.0001684	0.144	0.006				0.0001684	0.136	-0.002	8.42e-05	0.14	-0.008	0.0001684	0.172	-0.32	0.0003368	0.16	-0.001	8.42e-05	0.17	-0.16	8.42e-05	0.14	0.002
0.0001688	0.136	0.004				0.0001688	0.144	-0.002	8.44e-05	0.14	-0.004	0.0001688	0.17	-0.328	0.0003376	0.16	-0.001	8.44e-05	0.17	-0.192	8.44e-05	0.14	0.004
0.0001692	0.138	0.002				0.0001692	0.132	0.002	8.46e-05	0.14	-0.008	0.0001692	0.172	-0.312	0.0003384	0.158	0.000999995	8.46e-05	0.17	-0.184	8.46e-05	0.144	0.002
0.0001696	0.136	0.004				0.0001696	0.144	-0.002	8.48e-05	0.14	-0.008	0.0001696	0.174	-0.324	0.0003392	0.16	0.000999995	8.48e-05	0.17	-0.18	8.48e-05	0.144	0.002
0.00017	0.144	0.004				0.00017	0.14	0.002	8.5e-05	0.142	-0.004	0.00017	0.172	-0.348	0.00034	0.158	-0.001	8.5e-05	0.168	-0.208	8.5e-05	0.146	0.002
0.0001704	0.144	0.004				0.0001704	0.144	0.002	8.52e-05	0.142	-0.008	0.0001704	0.172	-0.34	0.0003408	0.156	-0.001	8.52e-05	0.172	-0.192	8.52e-05	0.142	0.002
0.0001708	0.136	0.004				0.0001708	0.14	-0.002	8.54e-05	0.142	-0.008	0.0001708	0.17	-0.336	0.0003416	0.158	0.003	8.54e-05	0.172	-0.22	8.54e-05	0.142	0.002
0.0001712	0.136	0.004				0.0001712	0.136	-0.002	8.56e-05	0.144	-0.004	0.0001712	0.168	-0.36	0.0003424	0.154	-0.001	8.56e-05	0.172	-0.204	8.56e-05	0.142	0.004
0.0001716	0.138	0.002				0.0001716	0.144	-0.002	8.58e-05	0.14	-0.008	0.0001716	0.17	-0.36	0.0003432	0.158	-0.003	8.58e-05	0.174	-0.208	8.58e-05	0.14	0.002
0.000172	0.14	0.004				0.000172	0.14	0.002	8.6e-05	0.14	-0.008	0.000172	0.172	-0.364	0.000344	0.156	-0.001	8.6e-05	0.174	-0.208	8.6e-05	0.14	0.002
0.0001724	0.14	0.004				0.0001724	0.14	-0.002	8.62e-05	0.14	-0.008	0.0001724	0.17	-0.352	0.0003448	0.154	-0.001	8.62e-05	0.172	-0.2	8.62e-05	0.142	0.002
0.0001728	0.136	0.002				0.0001728	0.144	-0.002	8.64e-05	0.14	-0.008	0.0001728	0.172	-0.344	0.0003456	0.154	-0.003	8.64e-05	0.174	-0.216	8.64e-05	0.142	0.002
0.0001732	0.14	0.006				0.0001732	0.14	-0.002	8.66e-05	0.142	-0.008	0.0001732	0.174	-0.364	0.0003464	0.152	-0.001	8.66e-05	0.172	-0.216	8.66e-05	0.142	0.004
0.0001736	0.142	0.004				0.0001736	0.148	0.002	8.68e-05	0.144	-0.016	0.0001736	0.174	-0.364	0.0003472	0.152	0.000999995	8.68e-05	0.174	-0.248	8.68e-05	0.14	0.002
0.000174	0.138	0.004				0.000174	0.144	0.002	8.7e-05	0.144	1.19209e-08	0.000174	0.174	-0.36	0.000348	0.154	0.000999995	8.7e-05	0.176	-0.264	8.7e-05	0.144	0.004
0.0001744	0.14	0.004				0.0001744	0.144	-0.002	8.72e-05	0.142	-0.004	0.0001744	0.174	-0.368	0.0003488	0.152	-0.003	8.72e-05	0.174	-0.276	8.72e-05	0.142	0.004
0.0001748	0.138	0.006				0.0001748	0.14	-0.002	8.74e-05	0.142	1.19209e-08	0.0001748	0.178	-0.388	0.0003496	0.152	0.000999995	8.74e-05	0.174	-0.276	8.74e-05	0.142	0.002
0.0001752	0.138	0.004				0.0001752	0.148	-0.002	8.76e-05	0.14	-0.008	0.0001752	0.176	-0.384	0.0003504	0.154	-0.001	8.76e-05	0.176	-0.284	8.76e-05	0.14	0.002
0.0001756	0.14	0.004				0.0001756	0.144	-0.002	8.78e-05	0.14	-0.004	0.0001756	0.178	-0.384	0.0003512	0.152	0.000999995	8.78e-05	0.178	-0.308	8.78e-05	0.138	0.004
0.000176	0.142	0.002				0.000176	0.144	0.006	8.8e-05	0.142	-0.008	0.000176	0.176	-0.392	0.000352	0.156	-0.001	8.8e-05	0.18	-0.292	8.8e-05	0.138	0.002
0.0001764	0.138	0.006				0.0001764	0.148	0.002	8.82e-05	0.14	-0.004	0.0001764	0.176	-0.372	0.0003528	0.152	-0.001	8.82e-05	0.176	-0.284	8.82e-05	0.136	0.002
0.0001768	0.142	0.004				0.0001768	0.14	-0.002	8.84e-05	0.14	-0.008	0.0001768	0.178	-0.36	0.0003536	0.156	0.003	8.84e-05	0.178	-0.292	8.84e-05	0.14	0.002
0.0001772	0.142	0.002				0.0001772	0.148	0.002	8.86e-05	0.142	1.19209e-08	0.0001772	0.178	-0.356	0.0003544	0.152	-0.003	8.86e-05	0.178	-0.32	8.86e-05	0.142	0.004
0.0001776	0.14	0.004				0.0001776	0.144	0.006	8.88e-05	0.14	-0.008	0.0001776	0.178	-0.348	0.0003552	0.152	-0.001	8.88e-05	0.18	-0.316	8.88e-05	0.142	0.002
0.000178	0.136	0.004				0.000178	0.14	0.002	8.9e-05	0.142	-0.004	0.000178	0.178	-0.344	0.000356	0.156	-0.001	8.9e-05	0.18	-0.328	8.9e-05	0.14	5.96047e-09
0.0001784	0.138	0.006				0.0001784	0.148	0.002	8.92e-05	0.138	1.19209e-08	0.0001784	0.178	-0.336	0.0003568	0.154	-0.001	8.92e-05	0.182	-0.324	8.92e-05	0.14	0.004
0.0001788	0.142	0.006				0.0001788	0.144	0.002	8.94e-05	0.142	-0.004	0.0001788	0.18	-0.32	0.0003576	0.156	0.000999995	8.94e-05	0.18	-0.32	8.94e-05	0.142	0.004
0.0001792	0.142	0.006				0.0001792	0.144	-0.002	8.96e-05	0.142	-0.004	0.0001792	0.178	-0.32	0.0003584	0.156	-0.001	8.96e-05	0.182	-0.312	8.96e-05	0.138	0.004
0.0001796	0.14	0.004				0.0001796	0.14	-0.002	8.98e-05	0.14	-0.008	0.0001796	0.18	-0.348	0.0003592	0.158	0.000999995	8.98e-05	0.18	-0.316	8.98e-05	0.142	0.002
0.00018	0.138	0.002				0.00018	0.144	0.006	9e-05	0.142	-0.004	0.00018	0.178	-0.344	0.00036	0.158	-0.001	9e-05	0.184	-0.352	9e-05	0.14	0.002
0.0001804	0.138	0.002				0.0001804	0.14	-0.006	9.02e-05	0.142	1.19209e-08	0.0001804	0.18	-0.336	0.0003608	0.158	-0.001	9.02e-05	0.184	-0.352	9.02e-05	0.142	0.002
0.0001808	0.142	0.004				0.0001808	0.144	0.002	9.04e-05	0.142	-0.004	0.0001808	0.18	-0.324	0.0003616	0.156	-0.001	9.04e-05	0.182	-0.368	9.04e-05	0.14	0.002
0.0001812	0.138	0.004				0.0001812	0.148	-0.002	9.06e-05	0.138	-0.008	0.0001812	0.18	-0.336	0.0003624	0.158	-0.001	9.06e-05	0.182	-0.368	9.06e-05	0.138	0.002
0.0001816	0.138	0.004				0.0001816	0.144	0.002	9.08e-05	0.142	-0.004	0.0001816	0.182	-0.344	0.0003632	0.156	-0.001	9.08e-05	0.184	-0.372	9.08e-05	0.136	0.002
0.000182	0.14	5.96047e-09				0.000182	0.144	-0.002	9.1e-05	0.14	1.19209e-08	0.000182	0.18	-0.336	0.000364	0.156	-0.001	9.1e-05	0.182	-0.376	9.1e-05	0.14	0.002
0.0001824	0.142	0.004				0.0001824	0.144	0.002	9.12e-05	0.14	-0.008	0.0001824	0.18	-0.324	0.0003648	0.162	-0.001	9.12e-05	0.184	-0.364	9.12e-05	0.142	0.004
0.0001828	0.138	0.004				0.0001828	0.144	-0.002	9.14e-05	0.142	1.19209e-08	0.0001828	0.182	-0.324	0.0003656	0.158	-0.001	9.14e-05	0.184	-0.368	9.14e-05	0.142	0.004
0.0001832	0.14	0.004				0.0001832	0.144	-0.002	9.16e-05	0.14	-0.004	0.0001832	0.186	-0.336	0.0003664	0.158	-0.001	9.16e-05	0.184	-0.36	9.16e-05	0.142	0.004
0.0001836	0.142	0.004				0.0001836	0.144	0.002	9.18e-05	0.142	-0.004	0.0001836	0.186	-0.332	0.0003672	0.16	-0.001	9.18e-05	0.184	-0.376	9.18e-05	0.136	0.004
0.000184	0.14	0.004				0.000184	0.14	-0.002	9.2e-05	0.14	-0.004	0.000184	0.184	-0.328	0.000368	0.156	-0.001	9.2e-05	0.184	-0.38	9.2e-05	0.138	0.002
0.0001844	0.138	0.006				0.0001844	0.14	-0.002	9.22e-05	0.144	-0.004	0.0001844	0.184	-0.324	0.0003688	0.156	-0.003	9.22e-05	0.182	-0.368	9.22e-05	0.14	0.004
0.0001848	0.138	0.002				0.0001848	0.144	-0.002	9.24e-05	0.14	-0.004	0.0001848	0.186	-0.372	0.0003696	0.156	-0.001	9.24e-05	0.186	-0.368	9.24e-05	0.14	0.002
0.0001852	0.14	0.004				0.0001852	0.144	0.002	9.26e-05	0.142	1.19209e-08	0.0001852	0.184	-0.356	0.0003704	0.156	-0.001	9.26e-05	0.188	-0.36	9.26e-05	0.142	0.004
0.0001856	0.14	0.004				0.0001856	0.14	0.002	9.28e-05	0.14	0.004	0.0001856	0.186	-0.352	0.0003712	0.156	-0.001	9.28e-05	0.186	-0.356	9.28e-05	0.14	0.004
0.000186	0.14	0.004				0.000186	0.14	0.002	9.3e-05	0.142	-0.004	0.000186	0.184	-0.372	0.000372	0.154	-0.003	9.3e-05	0.186	-0.364	9.3e-05	0.14	0.002
0.0001864	0.142	0.002				0.0001864	0.148	0.002	9.32e-05	0.14	-0.004	0.0001864	0.19	-0.352	0.0003728	0.156	0.000999995	9.32e-05	0.186	-0.384	9.32e-05	0.138	0.004
0.0001868	0.138	0.004				0.0001868	0.14	0.006	9.34e-05	0.142	-0.004	0.0001868	0.188	-0.348	0.0003736	0.154	-0.001	9.34e-05	0.182	-0.384	9.34e-05	0.14	0.002
0.0001872	0.14	0.004				0.0001872	0.144	0.006	9.36e-05	0.14	1.19209e-08	0.0001872	0.19	-0.34	0.0003744	0.152	-0.001	9.36e-05	0.186	-0.388	9.36e-05	0.142	5.96047e-09
0.0001876	0.142	0.002				0.0001876	0.144	-0.002	9.38e-05	0.142	1.19209e-08	0.0001876	0.19	-0.336	0.0003752	0.154	-0.001	9.38e-05	0.188	-0.388	9.38e-05	0.142	0.002
0.000188	0.142	0.004				0.000188	0.144	0.002	9.4e-05	0.142	1.19209e-08	0.000188	0.19	-0.336	0.000376	0.152	-0.003	9.4e-05	0.186	-0.384	9.4e-05	0.142	0.004
0.0001884	0.14	0.002				0.0001884	0.144	-0.002	9.42e-05	0.14	1.19209e-08	0.0001884	0.19	-0.32	0.0003768	0.154	0.000999995	9.42e-05	0.186	-0.404	9.42e-05	0.14	0.004
0.0001888	0.142	0.004				0.0001888	0.14	0.002	9.44e-05	0.14	-0.004	0.0001888	0.19	-0.32	0.0003776	0.154	-0.001	9.44e-05	0.186	-0.408	9.44e-05	0.138	0.004
0.0001892	0.142	0.006				0.0001892	0.144	-0.002	9.46e-05	0.142	-0.008	0.0001892	0.19	-0.324	0.0003784	0.152	-0.003	9.46e-05	0.186	-0.396	9.46e-05	0.136	0.004
0.0001896	0.138	0.004				0.0001896	0.148	-0.002	9.48e-05	0.14	1.19209e-08	0.0001896	0.194	-0.32	0.0003792	0.154	0.000999995	9.48e-05	0.186	-0.4	9.48e-05	0.138	0.004
0.00019	0.144	0.002				0.00019	0.136	-0.002	9.5e-05	0.142	-0.004	0.00019	0.194	-0.312	0.00038	0.154	0.000999995	9.5e-05	0.184	-0.412	9.5e-05	0.138	0.004
0.0001904	0.142	0.004				0.0001904	0.14	-0.002	9.52e-05	0.14	-0.008	0.0001904	0.192	-0.308	0.0003808	0.156	-0.001	9.52e-05	0.182	-0.412	9.52e-05	0.14	0.002
0.0001908	0.138	0.002				0.0001908	0.144	0.002	9.54e-05	0.142	-0.004	0.0001908	0.192	-0.296	0.0003816	0.152	-0.001	9.54e-05	0.184	-0.412	9.54e-05	0.142	0.004
0.0001912	0.142	0.004				0.0001912	0.148	-0.002	9.56e-05	0.142	1.19209e-08	0.0001912	0.194	-0.308	0.0003824	0.156	-0.001	9.56e-05	0.184	-0.404	9.56e-05	0.14	0.004
0.0001916	0.142	0.002				0.0001916	0.14	0.002	9.58e-05	0.138	1.19209e-08	0.0001916	0.192	-0.296	0.0003832	0.156	-0.001	9.58e-05	0.182	-0.4	9.58e-05	0.138	0.004
0.000192	0.138	0.006				0.000192	0.144	0.002	9.6e-05	0.142	-0.004	0.000192	0.194	-0.304	0.000384	0.156	-0.001	9.6e-05	0.18	-0.408	9.6e-05	0.138	5.96047e-09
0.0001924	0.142	0.002				0.0001924	0.144	-0.002	9.62e-05	0.142	-0.004	0.0001924	0.192	-0.292	0.0003848	0.156	0.000999995	9.62e-05	0.184	-0.436	9.62e-05	0.142	0.002
0.0001928	0.142	0.004				0.0001928	0.14	0.002	9.64e-05	0.142	-0.008	0.0001928	0.194	-0.28	0.0003856	0.156	0.000999995	9.64e-05	0.182	-0.436	9.64e-05	0.138	0.004
0.0001932	0.14	0.006				0.0001932	0.144	0.002	9.66e-05	0.142	-0.004	0.0001932	0.196	-0.272	0.0003864	0.154	-0.003	9.66e-05	0.182	-0.432	9.66e-05	0.14	0.004
0.0001936	0.138	0.002				0.0001936	0.144	0.002	9.68e-05	0.144	-0.004	0.0001936	0.194	-0.268	0.0003872	0.154	0.000999995	9.68e-05	0.182	-0.46	9.68e-05	0.138	0.004
0.000194	0.142	0.004				0.000194	0.144	0.002	9.7e-05	0.142	-0.004	0.000194	0.196	-0.26	0.000388	0.154	0.000999995	9.7e-05	0.18	-0.444	9.7e-05	0.14	0.006
0.0001944	0.142	0.004				0.0001944	0.144	0.006	9.72e-05	0.14	-0.004	0.0001944	0.198	-0.272	0.0003888	0.156	0.000999995	9.72e-05	0.178	-0.448	9.72e-05	0.136	0.004
0.0001948	0.142	5.96047e-09				0.0001948	0.144	0.002	9.74e-05	0.142	-0.008	0.0001948	0.2	-0.272	0.0003896	0.156	-0.001	9.74e-05	0.178	-0.464	9.74e-05	0.14	0.004
0.0001952	0.142	0.004				0.0001952	0.144	0.002	9.76e-05	0.144	1.19209e-08	0.0001952	0.198	-0.26	0.0003904	0.158	-0.001	9.76e-05	0.18	-0.48	9.76e-05	0.14	0.004
0.0001956	0.14	0.004				0.0001956	0.144	-0.006	9.78e-05	0.144	-0.004	0.0001956	0.198	-0.256	0.0003912	0.156	-0.003	9.78e-05	0.178	-0.48	9.78e-05	0.142	0.002
0.000196	0.14	0.004				0.000196	0.144	-0.002	9.8e-05	0.142	0.004	0.000196	0.198	-0.26	0.000392	0.158	0.000999995	9.8e-05	0.178	-0.468	9.8e-05	0.14	0.004
0.0001964	0.142	0.004				0.0001964	0.144	-0.002	9.82e-05	0.144	1.19209e-08	0.0001964	0.2	-0.248	0.0003928	0.158	0.000999995	9.82e-05	0.18	-0.472	9.82e-05	0.138	0.006
0.0001968	0.144	0.004				0.0001968	0.14	0.002	9.84e-05	0.144	1.19209e-08	0.0001968	0.202	-0.248	0.0003936	0.156	-0.003	9.84e-05	0.18	-0.464	9.84e-05	0.138	0.004
0.0001972	0.14	0.004				0.0001972	0.144	0.002	9.86e-05	0.142	1.19209e-08	0.0001972	0.2	-0.24	0.0003944	0.16	-0.001	9.86e-05	0.18	-0.468	9.86e-05	0.142	0.004
0.0001976	0.142	0.002				0.0001976	0.144	0.01	9.88e-05	0.144	-0.012	0.0001976	0.206	-0.232	0.0003952	0.156	-0.003	9.88e-05	0.18	-0.46	9.88e-05	0.142	5.96047e-09
0.000198	0.14	0.002				0.000198	0.144	-0.006	9.9e-05	0.144	-0.008	0.000198	0.21	-0.26	0.000396	0.16	-0.001	9.9e-05	0.18	-0.46	9.9e-05	0.14	0.004
0.0001984	0.14	0.004				0.0001984	0.14	0.002	9.92e-05	0.144	-0.008	0.0001984	0.212	-0.232	0.0003968	0.158	0.003	9.92e-05	0.178	-0.46	9.92e-05	0.14	0.004
0.0001988	0.14	0.002				0.0001988	0.144	0.002	9.94e-05	0.142	1.19209e-08	0.0001988	0.208	-0.228	0.0003976	0.156	-0.003	9.94e-05	0.176	-0.452	9.94e-05	0.14	0.006
0.0001992	0.146	0.004				0.0001992	0.144	-0.002	9.96e-05	0.142	-0.004	0.0001992	0.204	-0.22	0.0003984	0.156	-0.001	9.96e-05	0.18	-0.456	9.96e-05	0.136	0.004
0.0001996	0.14	0.004				0.0001996	0.144	-0.002	9.98e-05	0.144	-0.004	0.0001996	0.208	-0.224	0.0003992	0.156	-0.003	9.98e-05	0.178	-0.472	9.98e-05	0.138	0.004
0.0002	0.14	0.002				0.0002	0.144	-0.002	0.0001	0.144	1.19209e-08	0.0002	0.206	-0.224	0.0004	0.16	0.000999995	0.0001	0.178	-0.46	0.0001	0.14	0.004
0.0002004	0.14	0.004				0.0002004	0.144	-0.01	0.0001002	0.142	1.19209e-08				0.0004008	0.158	-0.003	0.0001002	0.18	-0.464	0.0001002	0.142	0.002
0.0002008	0.142	0.004				0.0002008	0.148	-0.002	0.0001004	0.144	1.19209e-08				0.0004016	0.156	-0.001	0.0001004	0.178	-0.456	0.0001004	0.142	0.004
0.0002012	0.142	0.004				0.0002012	0.144	-0.002	0.0001006	0.144	1.19209e-08				0.0004024	0.156	0.000999995	0.0001006	0.178	-0.452	0.0001006	0.144	0.004
0.0002016	0.142	0.002				0.0002016	0.144	-0.002	0.0001008	0.144	-0.004				0.0004032	0.156	-0.001	0.0001008	0.178	-0.448	0.0001008	0.142	0.004
0.000202	0.142	0.004				0.000202	0.14	-0.006	0.000101	0.142	1.19209e-08				0.000404	0.156	-0.001	0.000101	0.178	-0.448	0.000101	0.14	0.002
0.0002024	0.138	0.006				0.0002024	0.148	-0.002	0.0001012	0.142	1.19209e-08				0.0004048	0.158	-0.001	0.0001012	0.18	-0.444	0.0001012	0.138	0.004
0.0002028	0.144	0.004				0.0002028	0.144	0.006	0.0001014	0.142	-0.004				0.0004056	0.158	-0.003	0.0001014	0.18	-0.436	0.0001014	0.14	0.002
0.0002032	0.144	0.004				0.0002032	0.14	-0.006	0.0001016	0.144	-0.004				0.0004064	0.156	-0.001	0.0001016	0.18	-0.428	0.0001016	0.142	0.004
0.0002036	0.142	0.006				0.0002036	0.148	-0.006	0.0001018	0.142	-0.004				0.0004072	0.158	-0.003	0.0001018	0.182	-0.424	0.0001018	0.14	0.004
0.000204	0.142	0.004				0.000204	0.148	-0.002	0.000102	0.14	1.19209e-08				0.000408	0.156	-0.001	0.000102	0.18	-0.412	0.000102	0.138	0.004
0.0002044	0.146	0.002				0.0002044	0.144	-0.002	0.0001022	0.142	1.19209e-08				0.0004088	0.156	-0.001	0.0001022	0.18	-0.416	0.0001022	0.138	0.002
0.0002048	0.142	0.004				0.0002048	0.144	-0.006	0.0001024	0.14	-0.008				0.0004096	0.158	-0.001	0.0001024	0.18	-0.4	0.0001024	0.14	0.002
0.0002052	0.142	0.004				0.0002052	0.144	-0.006	0.0001026	0.142	1.19209e-08				0.0004104	0.156	-0.001	0.0001026	0.18	-0.4	0.0001026	0.14	0.004
0.0002056	0.144	0.004				0.0002056	0.144	-0.002	0.0001028	0.136	-0.008				0.0004112	0.158	-0.003	0.0001028	0.18	-0.4	0.0001028	0.14	0.002
0.000206	0.14	0.006				0.000206	0.14	-0.002	0.000103	0.142	-0.004				0.000412	0.158	-0.001	0.000103	0.182	-0.412	0.000103	0.14	0.004
0.0002064	0.142	0.004				0.0002064	0.148	-0.006	0.0001032	0.142	1.19209e-08				0.0004128	0.158	-0.001	0.0001032	0.18	-0.424	0.0001032	0.14	0.002
0.0002068	0.144	0.004				0.0002068	0.144	-0.002	0.0001034	0.144	-0.004				0.0004136	0.154	-0.001	0.0001034	0.182	-0.448	0.0001034	0.14	0.004
0.0002072	0.142	0.004				0.0002072	0.148	-0.002	0.0001036	0.144	0.004				0.0004144	0.156	0.000999995	0.0001036	0.182	-0.448	0.0001036	0.138	0.002
0.0002076	0.14	0.004				0.0002076	0.144	0.002	0.0001038	0.142	1.19209e-08				0.0004152	0.156	0.000999995	0.0001038	0.18	-0.44	0.0001038	0.14	0.004
0.000208	0.144	0.004				0.000208	0.144	-0.002	0.000104	0.142	-0.004				0.000416	0.158	-0.001	0.000104	0.182	-0.46	0.000104	0.142	0.004
0.0002084	0.142	0.004				0.0002084	0.14	-0.002	0.0001042	0.142	-0.004				0.0004168	0.158	0.000999995	0.0001042	0.182	-0.444	0.0001042	0.14	0.002
0.0002088	0.14	0.004				0.0002088	0.144	-0.002	0.0001044	0.14	-0.004				0.0004176	0.156	-0.001	0.0001044	0.182	-0.436	0.0001044	0.142	0.004
0.0002092	0.142	0.002				0.0002092	0.148	-0.002	0.0001046	0.142	-0.004				0.0004184	0.156	-0.001	0.0001046	0.182	-0.436	0.0001046	0.144	0.006
0.0002096	0.146	0.006				0.0002096	0.144	-0.006	0.0001048	0.138	-0.004				0.0004192	0.156	0.000999995	0.0001048	0.184	-0.424	0.0001048	0.14	0.004
0.00021	0.142	0.004				0.00021	0.148	-0.002	0.000105	0.14	1.19209e-08				0.00042	0.158	-0.001	0.000105	0.184	-0.42	0.000105	0.142	0.004
0.0002104	0.142	0.004				0.0002104	0.14	-0.002	0.0001052	0.14	-0.008				0.0004208	0.156	-0.001	0.0001052	0.182	-0.42	0.0001052	0.14	0.004
0.0002108	0.142	0.002				0.0002108	0.144	-0.002	0.0001054	0.142	-0.004				0.0004216	0.158	-0.001	0.0001054	0.182	-0.412	0.0001054	0.146	5.96047e-09
0.0002112	0.14	0.002				0.0002112	0.14	0.002	0.0001056	0.14	-0.008				0.0004224	0.156	-0.003	0.0001056	0.184	-0.408	0.0001056	0.144	0.004
0.0002116	0.144	0.004				0.0002116	0.144	-0.002	0.0001058	0.14	-0.004				0.0004232	0.158	0.000999995	0.0001058	0.184	-0.4	0.0001058	0.142	0.004
0.000212	0.146	0.004				0.000212	0.152	-0.002	0.000106	0.142	1.19209e-08				0.000424	0.158	-0.001	0.000106	0.184	-0.404	0.000106	0.14	0.004
0.0002124	0.144	0.004				0.0002124	0.148	-0.006	0.0001062	0.142	-0.004				0.0004248	0.156	-0.001	0.0001062	0.184	-0.396	0.0001062	0.136	0.006
0.0002128	0.14	0.006				0.0002128	0.144	-0.006	0.0001064	0.14	-0.008				0.0004256	0.158	0.000999995	0.0001064	0.182	-0.396	0.0001064	0.14	0.002
0.0002132	0.144	0.002				0.0002132	0.144	-0.002	0.0001066	0.142	1.19209e-08				0.0004264	0.158	-0.001	0.0001066	0.184	-0.416	0.0001066	0.144	0.004
0.0002136	0.144	0.004				0.0002136	0.148	-0.002	0.0001068	0.142	-0.004				0.0004272	0.16	-0.003	0.0001068	0.182	-0.408	0.0001068	0.144	0.004
0.000214	0.144	0.004				0.000214	0.144	-0.002	0.000107	0.144	0.004				0.000428	0.16	-0.001	0.000107	0.18	-0.404	0.000107	0.142	0.006
0.0002144	0.144	0.004				0.0002144	0.14	-0.002	0.0001072	0.144	1.19209e-08				0.0004288	0.158	-0.001	0.0001072	0.182	-0.392	0.0001072	0.142	0.006
0.0002148	0.142	0.004				0.0002148	0.144	-0.002	0.0001074	0.142	1.19209e-08				0.0004296	0.16	-0.001	0.0001074	0.182	-0.388	0.0001074	0.14	0.002
0.0002152	0.142	0.004				0.0002152	0.148	0.006	0.0001076	0.144	1.19209e-08				0.0004304	0.162	0.000999995	0.0001076	0.182	-0.396	0.0001076	0.142	0.004
0.0002156	0.144	0.004				0.0002156	0.148	0.002	0.0001078	0.142	-0.004				0.0004312	0.156	-0.003	0.0001078	0.182	-0.4	0.0001078	0.142	0.004
0.000216	0.144	0.004				0.000216	0.148	-0.002	0.000108	0.142	-0.004				0.000432	0.16	-0.001	0.000108	0.184	-0.396	0.000108	0.142	0.004
0.0002164	0.142	0.004				0.0002164	0.148	-0.002	0.0001082	0.144	0.004				0.0004328	0.154	-0.001	0.0001082	0.182	-0.392	0.0001082	0.144	0.002
0.0002168	0.142	0.004				0.0002168	0.144	0.006	0.0001084	0.142	1.19209e-08				0.0004336	0.16	-0.001	0.0001084	0.182	-0.396	0.0001084	0.14	0.004
0.0002172	0.144	0.004				0.0002172	0.148	-0.002	0.0001086	0.144	1.19209e-08				0.0004344	0.158	-0.001	0.0001086	0.182	-0.392	0.0001086	0.14	0.004
0.0002176	0.142	0.004				0.0002176	0.148	-0.006	0.0001088	0.144	1.19209e-08				0.0004352	0.156	-0.001	0.0001088	0.184	-0.396	0.0001088	0.142	0.006
0.000218	0.144	0.006				0.000218	0.144	-0.002	0.000109	0.146	1.19209e-08				0.000436	0.158	0.000999995	0.000109	0.182	-0.392	0.000109	0.14	0.004
0.0002184	0.146	0.006				0.0002184	0.152	0.002	0.0001092	0.144	-0.004				0.0004368	0.156	-0.001	0.0001092	0.18	-0.38	0.0001092	0.14	0.002
0.0002188	0.142	0.004				0.0002188	0.144	0.002	0.0001094	0.146	0.004				0.0004376	0.156	0.000999995	0.0001094	0.18	-0.384	0.0001094	0.142	0.004
0.0002192	0.14	0.006				0.0002192	0.148	-0.002	0.0001096	0.144	1.19209e-08				0.0004384	0.156	-0.001	0.0001096	0.182	-0.384	0.0001096	0.14	0.006
0.0002196	0.142	0.004				0.0002196	0.144	0.006	0.0001098	0.144	-0.004				0.0004392	0.156	0.000999995	0.0001098	0.184	-0.388	0.0001098	0.138	0.004
0.00022	0.144	0.004				0.00022	0.14	-0.002	0.00011	0.142	-0.008				0.00044	0.158	-0.001	0.00011	0.184	-0.388	0.00011	0.14	0.002
0.0002204	0.146	0.004				0.0002204	0.148	-0.002	0.0001102	0.144	-0.008				0.0004408	0.156	-0.001	0.0001102	0.184	-0.404	0.0001102	0.14	0.002
0.0002208	0.146	0.004				0.0002208	0.14	0.002	0.0001104	0.144	1.19209e-08				0.0004416	0.158	-0.001	0.0001104	0.184	-0.392	0.0001104	0.142	0.004
0.0002212	0.142	0.004				0.0002212	0.148	-0.006	0.0001106	0.146	0.004				0.0004424	0.156	0.000999995	0.0001106	0.184	-0.388	0.0001106	0.144	0.002
0.0002216	0.142	0.004				0.0002216	0.148	-0.002	0.0001108	0.142	1.19209e-08				0.0004432	0.158	0.000999995	0.0001108	0.182	-0.388	0.0001108	0.144	0.004
0.000222	0.146	0.004				0.000222	0.144	-0.002	0.000111	0.146	-0.004				0.000444	0.158	-0.001	0.000111	0.184	-0.384	0.000111	0.142	0.006
0.0002224	0.144	0.006				0.0002224	0.144	-0.002	0.0001112	0.146	1.19209e-08				0.0004448	0.158	-0.001	0.0001112	0.182	-0.376	0.0001112	0.138	0.004
0.0002228	0.142	0.002				0.0002228	0.152	0.002	0.0001114	0.146	1.19209e-08				0.0004456	0.162	-0.001	0.0001114	0.188	-0.372	0.0001114	0.138	0.002
0.0002232	0.144	0.002				0.0002232	0.152	0.002	0.0001116	0.142	1.19209e-08				0.0004464	0.158	-0.001	0.0001116	0.188	-0.384	0.0001116	0.14	0.006
0.0002236	0.146	0.004				0.0002236	0.148	0.002	0.0001118	0.146	-0.004				0.0004472	0.16	-0.003	0.0001118	0.188	-0.388	0.0001118	0.14	0.006
0.000224	0.144	0.004				0.000224	0.144	0.002	0.000112	0.146	1.19209e-08				0.000448	0.16	-0.001	0.000112	0.188	-0.38	0.000112	0.142	0.004
0.0002244	0.142	0.004				0.0002244	0.148	-0.002	0.0001122	0.144	1.19209e-08				0.0004488	0.158	-0.001	0.0001122	0.19	-0.38	0.0001122	0.14	5.96047e-09
0.0002248	0.144	0.002				0.0002248	0.148	-0.006	0.0001124	0.146	1.19209e-08				0.0004496	0.16	-0.001	0.0001124	0.19	-0.372	0.0001124	0.142	0.004
0.0002252	0.148	0.004				0.0002252	0.148	0.002	0.0001126	0.144	-0.004				0.0004504	0.16	-0.001	0.0001126	0.19	-0.364	0.0001126	0.144	0.004
0.0002256	0.142	0.006				0.0002256	0.144	-0.002	0.0001128	0.144	1.19209e-08				0.0004512	0.156	-0.001	0.0001128	0.19	-0.364	0.0001128	0.144	0.004
0.000226	0.142	0.006				0.000226	0.148	-0.006	0.000113	0.144	1.19209e-08				0.000452	0.158	-0.001	0.000113	0.19	-0.36	0.000113	0.14	0.004
0.0002264	0.14	0.004				0.0002264	0.144	0.002	0.0001132	0.142	1.19209e-08				0.0004528	0.158	-0.001	0.0001132	0.19	-0.356	0.0001132	0.138	0.004
0.0002268	0.144	0.004				0.0002268	0.148	-0.002	0.0001134	0.146	1.19209e-08				0.0004536	0.158	-0.005	0.0001134	0.192	-0.352	0.0001134	0.142	0.002
0.0002272	0.146	0.002				0.0002272	0.148	-0.006	0.0001136	0.14	1.19209e-08				0.0004544	0.158	0.000999995	0.0001136	0.19	-0.34	0.0001136	0.142	0.004
0.0002276	0.142	0.004				0.0002276	0.144	0.002	0.0001138	0.142	0.004				0.0004552	0.158	-0.001	0.0001138	0.194	-0.34	0.0001138	0.142	0.002
0.000228	0.142	0.004				0.000228	0.144	-0.002	0.000114	0.142	1.19209e-08				0.000456	0.158	0.000999995	0.000114	0.194	-0.36	0.000114	0.144	0.004
0.0002284	0.144	0.004				0.0002284	0.148	0.002	0.0001142	0.144	1.19209e-08				0.0004568	0.158	-0.001	0.0001142	0.196	-0.364	0.0001142	0.144	0.004
0.0002288	0.146	0.006				0.0002288	0.148	-0.002	0.0001144	0.142	1.19209e-08				0.0004576	0.16	-0.001	0.0001144	0.196	-0.352	0.0001144	0.142	0.004
0.0002292	0.142	0.002				0.0002292	0.148	-0.002	0.0001146	0.144	1.19209e-08				0.0004584	0.158	-0.001	0.0001146	0.194	-0.348	0.0001146	0.138	0.004
0.0002296	0.144	0.002				0.0002296	0.148	-0.002	0.0001148	0.142	1.19209e-08				0.0004592	0.156	-0.001	0.0001148	0.196	-0.34	0.0001148	0.14	0.004
0.00023	0.144	0.002				0.00023	0.148	-0.002	0.000115	0.144	-0.004				0.00046	0.16	0.000999995	0.000115	0.196	-0.332	0.000115	0.14	0.004
0.0002304	0.142	0.006				0.0002304	0.14	-0.002	0.0001152	0.144	-0.008				0.0004608	0.158	0.000999995	0.0001152	0.196	-0.332	0.0001152	0.138	0.008
0.0002308	0.144	0.004				0.0002308	0.144	-0.006	0.0001154	0.144	1.19209e-08				0.0004616	0.156	-0.001	0.0001154	0.198	-0.332	0.0001154	0.14	0.002
0.0002312	0.146	0.006				0.0002312	0.148	0.002	0.0001156	0.142	1.19209e-08				0.0004624	0.158	-0.001	0.0001156	0.198	-0.324	0.0001156	0.142	0.002
0.0002316	0.144	0.004				0.0002316	0.148	0.006	0.0001158	0.148	1.19209e-08				0.0004632	0.158	-0.001	0.0001158	0.194	-0.32	0.0001158	0.144	0.006
0.000232	0.144	0.004				0.000232	0.144	-0.006	0.000116	0.146	1.19209e-08				0.000464	0.158	-0.003	0.000116	0.198	-0.32	0.000116	0.146	0.002
0.0002324	0.144	0.004				0.0002324	0.148	0.002	0.0001162	0.142	1.19209e-08				0.0004648	0.158	-0.001	0.0001162	0.202	-0.324	0.0001162	0.144	0.002
0.0002328	0.142	0.004				0.0002328	0.148	-0.002	0.0001164	0.142	-0.004				0.0004656	0.158	-0.001	0.0001164	0.2	-0.324	0.0001164	0.142	5.96047e-09
0.0002332	0.144	0.006				0.0002332	0.152	0.006	0.0001166	0.142	-0.004				0.0004664	0.158	-0.001	0.0001166	0.198	-0.312	0.0001166	0.14	5.96047e-09
0.0002336	0.142	0.006				0.0002336	0.152	0.006	0.0001168	0.144	1.19209e-08				0.0004672	0.158	-0.001	0.0001168	0.2	-0.308	0.0001168	0.142	0.004
0.000234	0.144	0.004				0.000234	0.148	-0.002	0.000117	0.144	-0.004				0.000468	0.158	-0.001	0.000117	0.2	-0.324	0.000117	0.142	0.004
0.0002344	0.144	0.004				0.0002344	0.144	0.002	0.0001172	0.144	-0.004				0.0004688	0.158	-0.001	0.0001172	0.198	-0.316	0.0001172	0.14	0.004
0.0002348	0.138	0.004				0.0002348	0.148	-0.002	0.0001174	0.144	0.004				0.0004696	0.158	-0.001	0.0001174	0.2	-0.308	0.0001174	0.142	0.004
0.0002352	0.142	0.004				0.0002352	0.14	-0.002	0.0001176	0.144	-0.008				0.0004704	0.16	0.000999995	0.0001176	0.202	-0.308	0.0001176	0.142	0.006
0.0002356	0.144	0.006				0.0002356	0.144	-0.002	0.0001178	0.144	0.004				0.0004712	0.158	-0.001	0.0001178	0.202	-0.308	0.0001178	0.142	0.004
0.000236	0.142	0.004				0.000236	0.148	-0.002	0.000118	0.146	1.19209e-08				0.000472	0.16	-0.001	0.000118	0.2	-0.296	0.000118	0.144	0.002
0.0002364	0.142	0.002				0.0002364	0.148	0.002	0.0001182	0.144	1.19209e-08				0.0004728	0.154	0.000999995	0.0001182	0.202	-0.296	0.0001182	0.142	0.004
0.0002368	0.144	0.006				0.0002368	0.148	-0.002	0.0001184	0.146	1.19209e-08				0.0004736	0.158	-0.003	0.0001184	0.2	-0.292	0.0001184	0.142	0.004
0.0002372	0.144	0.004				0.0002372	0.152	0.002	0.0001186	0.146	0.004				0.0004744	0.158	-0.001	0.0001186	0.202	-0.292	0.0001186	0.142	0.006
0.0002376	0.142	0.006				0.0002376	0.144	-0.002	0.0001188	0.144	-0.004				0.0004752	0.156	0.000999995	0.0001188	0.204	-0.288	0.0001188	0.142	0.004
0.000238	0.142	5.96047e-09				0.000238	0.144	-0.002	0.000119	0.146	0.004				0.000476	0.154	-0.001	0.000119	0.202	-0.28	0.000119	0.142	0.004
0.0002384	0.142	0.002				0.0002384	0.148	0.002	0.0001192	0.146	1.19209e-08				0.0004768	0.156	-0.001	0.0001192	0.204	-0.276	0.0001192	0.142	0.004
0.0002388	0.142	0.004				0.0002388	0.144	-0.002	0.0001194	0.144	-0.004				0.0004776	0.156	-0.001	0.0001194	0.204	-0.284	0.0001194	0.142	0.004
0.0002392	0.144	0.004				0.0002392	0.152	-0.002	0.0001196	0.146	-0.004				0.0004784	0.158	0.000999995	0.0001196	0.204	-0.276	0.0001196	0.142	0.004
0.0002396	0.138	0.002				0.0002396	0.148	-0.002	0.0001198	0.146	1.19209e-08				0.0004792	0.158	-0.001	0.0001198	0.204	-0.276	0.0001198	0.142	0.004
0.00024	0.14	0.004				0.00024	0.144	-0.002	0.00012	0.146	1.19209e-08				0.00048	0.154	-0.001	0.00012	0.204	-0.272	0.00012	0.142	0.004
0.0002404	0.142	0.006				0.0002404	0.148	-0.002	0.0001202	0.144	1.19209e-08				0.0004808	0.156	-0.005	0.0001202	0.206	-0.268	0.0001202	0.144	0.004
0.0002408	0.14	0.004				0.0002408	0.148	0.002	0.0001204	0.146	-0.004				0.0004816	0.158	0.000999995	0.0001204	0.208	-0.272	0.0001204	0.142	0.004
0.0002412	0.138	0.002				0.0002412	0.144	0.002	0.0001206	0.148	-0.004				0.0004824	0.156	-0.001	0.0001206	0.204	-0.268	0.0001206	0.14	0.002
0.0002416	0.142	0.004				0.0002416	0.148	-0.002	0.0001208	0.144	1.19209e-08				0.0004832	0.154	-0.001	0.0001208	0.208	-0.264	0.0001208	0.146	0.004
0.000242	0.14	0.004				0.000242	0.144	0.002	0.000121	0.148	1.19209e-08				0.000484	0.156	-0.003	0.000121	0.206	-0.26	0.000121	0.144	0.002
0.0002424	0.138	0.004				0.0002424	0.148	-0.006	0.0001212	0.144	0.004				0.0004848	0.156	-0.001	0.0001212	0.206	-0.256	0.0001212	0.142	0.004
0.0002428	0.138	0.004				0.0002428	0.144	0.002	0.0001214	0.146	1.19209e-08				0.0004856	0.154	0.000999995	0.0001214	0.208	-0.252	0.0001214	0.142	0.002
0.0002432	0.142	0.002				0.0002432	0.148	0.002	0.0001216	0.144	-0.004				0.0004864	0.16	-0.001	0.0001216	0.208	-0.256	0.0001216	0.144	0.004
0.0002436	0.14	0.004				0.0002436	0.148	-0.006	0.0001218	0.146	1.19209e-08				0.0004872	0.154	-0.001	0.0001218	0.208	-0.248	0.0001218	0.14	0.004
0.000244	0.142	0.004				0.000244	0.152	-0.002	0.000122	0.146	1.19209e-08				0.000488	0.156	-0.003	0.000122	0.206	-0.268	0.000122	0.142	0.004
0.0002444	0.142	0.004				0.0002444	0.148	0.006	0.0001222	0.144	-0.004				0.0004888	0.156	-0.001	0.0001222	0.208	-0.264	0.0001222	0.14	0.004
0.0002448	0.14	0.004				0.0002448	0.152	0.002	0.0001224	0.144	1.19209e-08				0.0004896	0.158	-0.003	0.0001224	0.21	-0.268	0.0001224	0.14	0.004
0.0002452	0.142	0.004				0.0002452	0.14	-0.002	0.0001226	0.142	1.19209e-08				0.0004904	0.158	-0.001	0.0001226	0.21	-0.268	0.0001226	0.14	0.004
0.0002456	0.144	0.002				0.0002456	0.14	-0.002	0.0001228	0.142	1.19209e-08				0.0004912	0.158	-0.001	0.0001228	0.212	-0.28	0.0001228	0.14	0.002
0.000246	0.142	0.004				0.000246	0.148	-0.002	0.000123	0.146	0.004				0.000492	0.158	-0.001	0.000123	0.214	-0.28	0.000123	0.144	0.004
0.0002464	0.142	0.004				0.0002464	0.144	0.002	0.0001232	0.148	-0.004				0.0004928	0.158	-0.001	0.0001232	0.216	-0.272	0.0001232	0.142	0.004
0.0002468	0.14	0.004				0.0002468	0.152	0.002	0.0001234	0.146	1.19209e-08				0.0004936	0.156	-0.001	0.0001234	0.214	-0.272	0.0001234	0.144	0.002
0.0002472	0.142	0.004				0.0002472	0.152	-0.002	0.0001236	0.146	-0.004				0.0004944	0.156	-0.001	0.0001236	0.216	-0.264	0.0001236	0.142	0.004
0.0002476	0.142	0.004				0.0002476	0.148	-0.006	0.0001238	0.144	1.19209e-08				0.0004952	0.156	-0.001	0.0001238	0.218	-0.268	0.0001238	0.142	0.004
0.000248	0.142	0.006				0.000248	0.152	0.01	0.000124	0.146	-0.004				0.000496	0.158	-0.001	0.000124	0.218	-0.26	0.000124	0.14	0.002
0.0002484	0.142	0.006				0.0002484	0.148	-0.002	0.0001242	0.146	1.19209e-08				0.0004968	0.158	-0.001	0.0001242	0.22	-0.26	0.0001242	0.14	0.002
0.0002488	0.14	0.002				0.0002488	0.152	-0.002	0.0001244	0.146	-0.004				0.0004976	0.156	-0.001	0.0001244	0.222	-0.256	0.0001244	0.144	0.004
0.0002492	0.144	0.004				0.0002492	0.152	-0.002	0.0001246	0.146	0.004				0.0004984	0.158	-0.001	0.0001246	0.22	-0.248	0.0001246	0.14	0.004
0.0002496	0.142	0.004				0.0002496	0.14	-0.002	0.0001248	0.148	1.19209e-08				0.0004992	0.156	-0.001	0.0001248	0.222	-0.248	0.0001248	0.142	0.002
0.00025	0.138	0.004				0.00025	0.152	-0.002	0.000125	0.144	1.19209e-08				0.0005	0.158	-0.001	0.000125	0.222	-0.248	0.000125	0.14	0.004
0.0002504	0.142	0.004				0.0002504	0.144	0.002	0.0001252	0.144	0.004				0.0005008	0.156	-0.001	0.0001252	0.222	-0.24	0.0001252	0.144	0.004
0.0002508	0.146	0.006				0.0002508	0.148	0.002	0.0001254	0.146	0.004				0.0005016	0.154	-0.001	0.0001254	0.222	-0.236	0.0001254	0.14	0.004
0.0002512	0.142	0.004				0.0002512	0.144	0.006	0.0001256	0.144	0.004				0.0005024	0.158	-0.001	0.0001256	0.22	-0.24	0.0001256	0.142	0.002
0.0002516	0.14	0.002				0.0002516	0.148	-0.002	0.0001258	0.148	-0.004				0.0005032	0.158	-0.001	0.0001258	0.22	-0.232	0.0001258	0.144	0.004
0.000252	0.146	0.002				0.000252	0.156	-0.002	0.000126	0.146	1.19209e-08				0.000504	0.154	-0.001	0.000126	0.218	-0.224	0.000126	0.144	0.004
0.0002524	0.142	0.004				0.0002524	0.148	0.002	0.0001262	0.148	0.004				0.0005048	0.16	-0.001	0.0001262	0.22	-0.228	0.0001262	0.142	0.004
0.0002528	0.142	0.006				0.0002528	0.152	-0.002	0.0001264	0.146	-0.004				0.0005056	0.156	-0.001	0.0001264	0.216	-0.22	0.0001264	0.14	0.004
0.0002532	0.14	0.004				0.0002532	0.148	-0.006	0.0001266	0.146	-0.004				0.0005064	0.156	-0.001	0.0001266	0.214	-0.22	0.0001266	0.14	0.006
0.0002536	0.14	0.006				0.0002536	0.144	-0.002	0.0001268	0.148	-0.004				0.0005072	0.158	-0.001	0.0001268	0.214	-0.224	0.0001268	0.138	0.002
0.000254	0.142	0.002				0.000254	0.144	-0.002	0.000127	0.146	1.19209e-08				0.000508	0.158	-0.001	0.000127	0.216	-0.224	0.000127	0.14	0.004
0.0002544	0.148	0.004				0.0002544	0.144	0.002	0.0001272	0.148	0.004				0.0005088	0.156	-0.001	0.0001272	0.212	-0.216	0.0001272	0.142	0.002
0.0002548	0.144	0.002				0.0002548	0.152	-0.002	0.0001274	0.146	1.19209e-08				0.0005096	0.156	0.000999995	0.0001274	0.212	-0.208	0.0001274	0.144	0.002
0.0002552	0.138	0.004				0.0002552	0.152	-0.002	0.0001276	0.146	1.19209e-08				0.0005104	0.16	0.000999995	0.0001276	0.212	-0.212	0.0001276	0.144	0.004
0.0002556	0.142	0.004				0.0002556	0.152	0.002	0.0001278	0.148	1.19209e-08				0.0005112	0.158	-0.001	0.0001278	0.208	-0.224	0.0001278	0.144	0.004
0.000256	0.144	0.002				0.000256	0.148	-0.002	0.000128	0.146	0.004				0.000512	0.16	0.000999995	0.000128	0.208	-0.248	0.000128	0.144	0.006
0.0002564	0.144	0.002				0.0002564	0.148	-0.002	0.0001282	0.15	1.19209e-08				0.0005128	0.16	-0.001	0.0001282	0.204	-0.244	0.0001282	0.142	0.004
0.0002568	0.146	0.004				0.0002568	0.152	0.002	0.0001284	0.146	1.19209e-08				0.0005136	0.16	-0.001	0.0001284	0.204	-0.24	0.0001284	0.144	0.004
0.0002572	0.142	0.004				0.0002572	0.152	0.002	0.0001286	0.15	1.19209e-08				0.0005144	0.156	0.000999995	0.0001286	0.204	-0.244	0.0001286	0.142	0.004
0.0002576	0.14	0.002				0.0002576	0.156	-0.002	0.0001288	0.148	-0.004				0.0005152	0.158	-0.001	0.0001288	0.202	-0.24	0.0001288	0.14	0.004
0.000258	0.142	0.006				0.000258	0.148	0.002	0.000129	0.148	0.004				0.000516	0.162	-0.001	0.000129	0.204	-0.236	0.000129	0.14	0.004
0.0002584	0.148	0.004				0.0002584	0.148	-0.002	0.0001292	0.148	-0.004				0.0005168	0.158	-0.001	0.0001292	0.202	-0.228	0.0001292	0.14	0.006
0.0002588	0.144	0.006				0.0002588	0.144	-0.002	0.0001294	0.146	1.19209e-08				0.0005176	0.158	-0.001	0.0001294	0.202	-0.228	0.0001294	0.142	0.004
0.0002592	0.142	0.002				0.0002592	0.148	0.002	0.0001296	0.146	1.19209e-08				0.0005184	0.158	-0.001	0.0001296	0.198	-0.224	0.0001296	0.144	0.006
0.0002596	0.142	0.002				0.0002596	0.156	-0.002	0.0001298	0.148	1.19209e-08				0.0005192	0.158	-0.003	0.0001298	0.2	-0.22	0.0001298	0.144	0.004
0.00026	0.138	0.004				0.00026	0.148	-0.002	0.00013	0.148	1.19209e-08				0.00052	0.158	0.000999995	0.00013	0.198	-0.216	0.00013	0.142	0.004
0.0002604	0.14	0.004				0.0002604	0.148	-0.002	0.0001302	0.148	0.004				0.0005208	0.162	-0.001	0.0001302	0.198	-0.216	0.0001302	0.144	0.004
0.0002608	0.146	0.004				0.0002608	0.144	0.002	0.0001304	0.15	1.19209e-08				0.0005216	0.158	-0.001	0.0001304	0.198	-0.22	0.0001304	0.144	0.004
0.0002612	0.144	0.004				0.0002612	0.148	0.006	0.0001306	0.15	1.19209e-08				0.0005224	0.16	-0.003	0.0001306	0.194	-0.236	0.0001306	0.14	0.004
0.0002616	0.146	0.004				0.0002616	0.148	-0.002	0.0001308	0.148	-0.008				0.0005232	0.158	-0.005	0.0001308	0.194	-0.228	0.0001308	0.142	0.002
0.000262	0.142	0.006				0.000262	0.148	0.002	0.000131	0.148	-0.004				0.000524	0.156	-0.001	0.000131	0.196	-0.228	0.000131	0.14	0.004
0.0002624	0.14	0.004				0.0002624	0.156	-0.002	0.0001312	0.148	1.19209e-08				0.0005248	0.158	-0.001	0.0001312	0.196	-0.22	0.0001312	0.142	0.002
0.0002628	0.14	0.004				0.0002628	0.156	0.002	0.0001314	0.148	0.004				0.0005256	0.162	-0.001	0.0001314	0.198	-0.212	0.0001314	0.142	0.004
0.0002632	0.144	0.004				0.0002632	0.156	0.002	0.0001316	0.148	-0.004				0.0005264	0.158	-0.001	0.0001316	0.196	-0.216	0.0001316	0.14	0.006
0.0002636	0.144	0.006				0.0002636	0.144	0.002	0.0001318	0.15	0.004				0.0005272	0.158	-0.001	0.0001318	0.196	-0.208	0.0001318	0.14	0.002
0.000264	0.138	0.006				0.000264	0.156	-0.002	0.000132	0.15	1.19209e-08				0.000528	0.158	-0.001	0.000132	0.198	-0.208	0.000132	0.142	0.002
0.0002644	0.14	0.002				0.0002644	0.148	0.002	0.0001322	0.15	-0.004				0.0005288	0.16	-0.003	0.0001322	0.2	-0.212	0.0001322	0.14	0.002
0.0002648	0.142	0.004				0.0002648	0.156	-0.002	0.0001324	0.15	1.19209e-08				0.0005296	0.158	-0.001	0.0001324	0.2	-0.208	0.0001324	0.146	0.004
0.0002652	0.142	0.002				0.0002652	0.156	0.006	0.0001326	0.15	1.19209e-08				0.0005304	0.16	-0.001	0.0001326	0.202	-0.196	0.0001326	0.146	0.002
0.0002656	0.142	0.004				0.0002656	0.144	0.002	0.0001328	0.148	1.19209e-08				0.0005312	0.162	-0.001	0.0001328	0.2	-0.204	0.0001328	0.146	0.002
0.000266	0.144	0.004				0.000266	0.144	0.006	0.000133	0.148	0.004				0.000532	0.162	-0.001	0.000133	0.2	-0.208	0.000133	0.144	0.004
0.0002664	0.138	0.008				0.0002664	0.152	0.002	0.0001332	0.148	1.19209e-08				0.0005328	0.16	-0.001	0.0001332	0.204	-0.204	0.0001332	0.142	0.006
0.0002668	0.14	0.004				0.0002668	0.148	-0.002	0.0001334	0.148	1.19209e-08				0.0005336	0.162	-0.003	0.0001334	0.2	-0.2	0.0001334	0.142	0.006
0.0002672	0.14	0.004				0.0002672	0.152	-0.006	0.0001336	0.146	1.19209e-08				0.0005344	0.16	-0.001	0.0001336	0.204	-0.2	0.0001336	0.142	0.004
0.0002676	0.14	0.004				0.0002676	0.152	-0.002	0.0001338	0.148	-0.004				0.0005352	0.158	-0.001	0.0001338	0.204	-0.196	0.0001338	0.142	0.002
0.000268	0.142	0.004				0.000268	0.152	-0.002	0.000134	0.15	-0.004				0.000536	0.16	0.000999995	0.000134	0.202	-0.192	0.000134	0.142	0.002
0.0002684	0.14	0.002				0.0002684	0.148	0.002	0.0001342	0.146	1.19209e-08				0.0005368	0.16	-0.001	0.0001342	0.2	-0.192	0.0001342	0.146	0.002
0.0002688	0.142	0.004				0.0002688	0.156	0.006	0.0001344	0.148	1.19209e-08				0.0005376	0.162	-0.001	0.0001344	0.202	-0.192	0.0001344	0.146	5.96047e-09
0.0002692	0.14	0.006				0.0002692	0.152	-0.006	0.0001346	0.146	1.19209e-08				0.0005384	0.16	-0.001	0.0001346	0.204	-0.184	0.0001346	0.146	0.002
0.0002696	0.146	0.002				0.0002696	0.148	0.002	0.0001348	0.15	-0.004				0.0005392	0.162	-0.001	0.0001348	0.2	-0.188	0.0001348	0.142	0.006
0.00027	0.146	0.004				0.00027	0.152	-0.002	0.000135	0.144	1.19209e-08				0.00054	0.162	-0.001	0.000135	0.2	-0.18	0.000135	0.142	0.004
0.0002704	0.14	0.004				0.0002704	0.144	-0.002	0.0001352	0.146	1.19209e-08				0.0005408	0.16	-0.003	0.0001352	0.198	-0.176	0.0001352	0.144	0.004
0.0002708	0.144	0.004				0.0002708	0.148	0.002	0.0001354	0.15	1.19209e-08				0.0005416	0.158	0.000999995	0.0001354	0.198	-0.176	0.0001354	0.144	0.002
0.0002712	0.144	0.002				0.0002712	0.152	0.002	0.0001356	0.148	0.004				0.0005424	0.162	-0.003	0.0001356	0.198	-0.176	0.0001356	0.146	0.004
0.0002716	0.14	0.004				0.0002716	0.144	0.006	0.0001358	0.15	0.004				0.0005432	0.16	-0.001	0.0001358	0.198	-0.172	0.0001358	0.144	0.004
0.000272	0.144	0.006				0.000272	0.148	-0.002	0.000136	0.148	-0.004				0.000544	0.162	-0.001	0.000136	0.198	-0.164	0.000136	0.146	0.006
0.0002724	0.144	0.006				0.0002724	0.152	-0.002	0.0001362	0.146	1.19209e-08				0.0005448	0.16	-0.003	0.0001362	0.2	-0.172	0.0001362	0.146	0.006
0.0002728	0.14	0.004				0.0002728	0.14	0.006	0.0001364	0.144	1.19209e-08				0.0005456	0.162	-0.001	0.0001364	0.2	-0.164	0.0001364	0.144	-0.008
0.0002732	0.144	0.002				0.0002732	0.148	-0.002	0.0001366	0.142	0.004				0.0005464	0.16	-0.003	0.0001366	0.198	-0.164	0.0001366	0.146	-0.006
0.0002736	0.146	0.004				0.0002736	0.148	0.002	0.0001368	0.144	1.19209e-08				0.0005472	0.162	0.000999995	0.0001368	0.196	-0.16	0.0001368	0.146	-0.008
0.000274	0.142	0.004				0.000274	0.156	0.006	0.000137	0.144	0.004				0.000548	0.16	-0.001	0.000137	0.196	-0.156	0.000137	0.142	-0.008
0.0002744	0.142	0.002				0.0002744	0.152	0.002	0.0001372	0.148	1.19209e-08				0.0005488	0.16	-0.001	0.0001372	0.192	-0.156	0.0001372	0.142	-0.01
0.0002748	0.148	0.002				0.0002748	0.152	0.002	0.0001374	0.146	1.19209e-08				0.0005496	0.162	0.000999995	0.0001374	0.196	-0.152	0.0001374	0.144	-0.006
0.0002752	0.144	0.004				0.0002752	0.148	-0.002	0.0001376	0.146	0.004				0.0005504	0.16	0.000999995	0.0001376	0.194	-0.152	0.0001376	0.146	-0.01
0.0002756	0.142	0.004				0.0002756	0.148	-0.002	0.0001378	0.146	-0.004				0.0005512	0.158	-0.001	0.0001378	0.192	-0.14	0.0001378	0.146	-0.008
0.000276	0.14	5.96047e-09				0.000276	0.156	0.006	0.000138	0.146	-0.004				0.000552	0.162	-0.001	0.000138	0.196	-0.144	0.000138	0.146	-0.008
0.0002764	0.146	0.004				0.0002764	0.156	0.002	0.0001382	0.148	1.19209e-08				0.0005528	0.16	-0.001	0.0001382	0.19	-0.152	0.0001382	0.144	-0.008
0.0002768	0.144	0.004				0.0002768	0.148	0.006	0.0001384	0.148	1.19209e-08				0.0005536	0.162	-0.001	0.0001384	0.19	-0.152	0.0001384	0.144	-0.008
0.0002772	0.144	0.004				0.0002772	0.148	-0.002	0.0001386	0.146	-0.004				0.0005544	0.162	-0.001	0.0001386	0.188	-0.144	0.0001386	0.144	-0.006
0.0002776	0.144	0.002				0.0002776	0.148	-0.002	0.0001388	0.148	1.19209e-08				0.0005552	0.162	-0.001	0.0001388	0.192	-0.148	0.0001388	0.144	-0.006
0.000278	0.144	5.96047e-09				0.000278	0.148	0.006	0.000139	0.148	1.19209e-08				0.000556	0.162	-0.001	0.000139	0.192	-0.144	0.000139	0.146	-0.006
0.0002784	0.144	0.002				0.0002784	0.148	0.002	0.0001392	0.146	1.19209e-08				0.0005568	0.16	-0.001	0.0001392	0.192	-0.14	0.0001392	0.144	-0.006
0.0002788	0.144	0.004				0.0002788	0.148	0.002	0.0001394	0.148	1.19209e-08				0.0005576	0.162	-0.001	0.0001394	0.192	-0.14	0.0001394	0.146	-0.006
0.0002792	0.142	0.004				0.0002792	0.148	-0.002	0.0001396	0.146	0.004				0.0005584	0.162	-0.001	0.0001396	0.194	-0.132	0.0001396	0.148	-0.008
0.0002796	0.144	5.96047e-09				0.0002796	0.152	-0.002	0.0001398	0.148	1.19209e-08				0.0005592	0.16	-0.001	0.0001398	0.194	-0.144	0.0001398	0.144	-0.006
0.00028	0.148	0.002				0.00028	0.148	0.002	0.00014	0.148	-0.004				0.00056	0.162	-0.001	0.00014	0.194	-0.14	0.00014	0.144	-0.002
0.0002804	0.14	0.004				0.0002804	0.144	-0.002	0.0001402	0.146	1.19209e-08				0.0005608	0.158	-0.001	0.0001402	0.192	-0.14	0.0001402	0.144	-0.006
0.0002808	0.14	0.004				0.0002808	0.148	0.002	0.0001404	0.146	-0.008				0.0005616	0.154	-0.001	0.0001404	0.192	-0.152	0.0001404	0.142	-0.006
0.0002812	0.144	0.002				0.0002812	0.148	0.002	0.0001406	0.148	1.19209e-08				0.0005624	0.16	-0.001	0.0001406	0.194	-0.156	0.0001406	0.142	-0.006
0.0002816	0.144	0.004				0.0002816	0.148	-0.002	0.0001408	0.148	-0.004				0.0005632	0.156	-0.001	0.0001408	0.194	-0.144	0.0001408	0.146	-0.004
0.000282	0.142	0.008				0.000282	0.152	0.002	0.000141	0.148	0.004				0.000564	0.16	-0.001	0.000141	0.194	-0.14	0.000141	0.146	-0.004
0.0002824	0.144	0.002				0.0002824	0.152	-0.002	0.0001412	0.148	1.19209e-08				0.0005648	0.158	-0.001	0.0001412	0.194	-0.144	0.0001412	0.146	-0.008
0.0002828	0.142	0.004				0.0002828	0.156	0.002	0.0001414	0.148	1.19209e-08				0.0005656	0.156	-0.001	0.0001414	0.196	-0.14	0.0001414	0.148	-0.008
0.0002832	0.14	0.004				0.0002832	0.144	0.006	0.0001416	0.148	1.19209e-08				0.0005664	0.158	-0.001	0.0001416	0.194	-0.172	0.0001416	0.148	-0.006
0.0002836	0.142	0.004				0.0002836	0.156	0.002	0.0001418	0.148	-0.004				0.0005672	0.158	0.000999995	0.0001418	0.198	-0.144	0.0001418	0.146	-0.004
0.000284	0.144	0.004				0.000284	0.156	-0.002	0.000142	0.148	-0.004				0.000568	0.158	-0.003	0.000142	0.2	-0.148	0.000142	0.144	-0.004
0.0002844	0.144	0.004				0.0002844	0.148	-0.002	0.0001422	0.15	0.004				0.0005688	0.162	-0.001	0.0001422	0.2	-0.144	0.0001422	0.142	-0.004
0.0002848	0.138	0.002				0.0002848	0.152	0.002	0.0001424	0.148	0.004				0.0005696	0.16	-0.003	0.0001424	0.2	-0.14	0.0001424	0.142	-0.004
0.0002852	0.142	0.004				0.0002852	0.152	0.002	0.0001426	0.146	-0.004				0.0005704	0.16	-0.001	0.0001426	0.2	-0.148	0.0001426	0.144	-0.004
0.0002856	0.14	0.006				0.0002856	0.152	-0.006	0.0001428	0.148	1.19209e-08				0.0005712	0.162	-0.001	0.0001428	0.198	-0.156	0.0001428	0.146	-0.004
0.000286	0.142	0.004				0.000286	0.148	-0.002	0.000143	0.148	-0.004				0.000572	0.16	-0.003	0.000143	0.2	-0.148	0.000143	0.148	-0.004
0.0002864	0.142	0.004				0.0002864	0.156	0.006	0.0001432	0.148	0.004				0.0005728	0.16	-0.001	0.0001432	0.2	-0.156	0.0001432	0.146	-0.006
0.0002868	0.14	0.002				0.0002868	0.152	0.006	0.0001434	0.148	1.19209e-08				0.0005736	0.16	-0.003	0.0001434	0.202	-0.152	0.0001434	0.146	-0.004
0.0002872	0.142	0.002				0.0002872	0.152	-0.002	0.0001436	0.148	1.19209e-08				0.0005744	0.158	0.000999995	0.0001436	0.204	-0.14	0.0001436	0.144	-0.002
0.0002876	0.144	0.004				0.0002876	0.148	0.002	0.0001438	0.148	-0.004				0.0005752	0.162	-0.003	0.0001438	0.204	-0.148	0.0001438	0.146	-0.002
0.000288	0.14	0.006				0.000288	0.144	-0.002	0.000144	0.146	1.19209e-08				0.000576	0.16	-0.003	0.000144	0.202	-0.14	0.000144	0.146	-0.004
0.0002884	0.14	0.004				0.0002884	0.148	0.002	0.0001442	0.146	1.19209e-08				0.0005768	0.158	-0.003	0.0001442	0.2	-0.144	0.0001442	0.146	-0.004
0.0002888	0.142	0.002				0.0002888	0.156	0.002	0.0001444	0.148	1.19209e-08				0.0005776	0.164	-0.001	0.0001444	0.2	-0.136	0.0001444	0.146	-0.004
0.0002892	0.138	0.006				0.0002892	0.148	0.002	0.0001446	0.148	1.19209e-08				0.0005784	0.158	0.000999995	0.0001446	0.202	-0.136	0.0001446	0.146	5.96047e-09
0.0002896	0.138	0.004				0.0002896	0.148	0.002	0.0001448	0.146	1.19209e-08				0.0005792	0.16	-0.001	0.0001448	0.2	-0.128	0.0001448	0.142	-0.004
0.00029	0.144	0.006				0.00029	0.144	-0.002	0.000145	0.146	1.19209e-08				0.00058	0.162	-0.001	0.000145	0.198	-0.124	0.000145	0.146	-0.004
0.0002904	0.144	0.004				0.0002904	0.144	0.002	0.0001452	0.144	1.19209e-08				0.0005808	0.162	-0.001	0.0001452	0.198	-0.124	0.0001452	0.146	-0.002
0.0002908	0.142	0.004				0.0002908	0.148	0.002	0.0001454	0.144	1.19209e-08				0.0005816	0.16	-0.001	0.0001454	0.198	-0.128	0.0001454	0.148	5.96047e-09
0.0002912	0.138	0.006				0.0002912	0.152	-0.002	0.0001456	0.146	1.19209e-08				0.0005824	0.162	-0.001	0.0001456	0.198	-0.12	0.0001456	0.148	-0.004
0.0002916	0.142	0.002				0.0002916	0.148	-0.002	0.0001458	0.148	0.004				0.0005832	0.162	-0.003	0.0001458	0.198	-0.124	0.0001458	0.142	5.96047e-09
0.000292	0.144	0.002				0.000292	0.144	-0.002	0.000146	0.148	-0.004				0.000584	0.16	-0.003	0.000146	0.2	-0.124	0.000146	0.144	-0.002
0.0002924	0.142	0.004				0.0002924	0.148	0.002	0.0001462	0.146	1.19209e-08				0.0005848	0.162	-0.001	0.0001462	0.198	-0.12	0.0001462	0.144	-0.004
0.0002928	0.144	0.004				0.0002928	0.152	-0.002	0.0001464	0.146	1.19209e-08				0.0005856	0.162	-0.001	0.0001464	0.198	-0.116	0.0001464	0.146	-0.002
0.0002932	0.142	0.006				0.0002932	0.156	0.006	0.0001466	0.148	-0.004				0.0005864	0.158	0.003	0.0001466	0.198	-0.128	0.0001466	0.148	-0.004
0.0002936	0.14	0.004				0.0002936	0.152	-0.002	0.0001468	0.146	1.19209e-08				0.0005872	0.16	0.000999995	0.0001468	0.198	-0.124	0.0001468	0.146	-0.002
0.000294	0.142	0.002				0.000294	0.152	-0.002	0.000147	0.146	1.19209e-08				0.000588	0.162	-0.001	0.000147	0.194	-0.132	0.000147	0.144	-0.002
0.0002944	0.146	0.006				0.0002944	0.148	-0.006	0.0001472	0.144	0.008				0.0005888	0.16	-0.001	0.0001472	0.196	-0.12	0.0001472	0.144	-0.004
0.0002948	0.142	0.006				0.0002948	0.152	-0.002	0.0001474	0.146	1.19209e-08				0.0005896	0.162	-0.001	0.0001474	0.196	-0.14	0.0001474	0.144	5.96047e-09
0.0002952	0.142	0.002				0.0002952	0.156	0.002	0.0001476	0.148	-0.004				0.0005904	0.162	-0.001	0.0001476	0.198	-0.132	0.0001476	0.146	-0.002
0.0002956	0.142	0.006				0.0002956	0.152	-0.002	0.0001478	0.146	1.19209e-08				0.0005912	0.162	-0.001	0.0001478	0.196	-0.136	0.0001478	0.146	-0.002
0.000296	0.144	0.004				0.000296	0.148	0.002	0.000148	0.148	1.19209e-08				0.000592	0.16	-0.003	0.000148	0.196	-0.14	0.000148	0.15	5.96047e-09
0.0002964	0.146	0.004				0.0002964	0.152	0.002	0.0001482	0.148	1.19209e-08				0.0005928	0.16	-0.001	0.0001482	0.196	-0.136	0.0001482	0.148	-0.002
0.0002968	0.144	0.002				0.0002968	0.156	0.002	0.0001484	0.148	1.19209e-08				0.0005936	0.16	-0.001	0.0001484	0.2	-0.132	0.0001484	0.144	5.96047e-09
0.0002972	0.144	0.006				0.0002972	0.152	-0.002	0.0001486	0.148	1.19209e-08				0.0005944	0.162	-0.001	0.0001486	0.196	-0.128	0.0001486	0.146	5.96047e-09
0.0002976	0.142	0.008				0.0002976	0.152	-0.002	0.0001488	0.146	0.004				0.0005952	0.162	0.000999995	0.0001488	0.198	-0.12	0.0001488	0.148	-0.002
0.000298	0.146	0.006				0.000298	0.156	-0.002	0.000149	0.146	1.19209e-08				0.000596	0.16	0.000999995	0.000149	0.198	-0.124	0.000149	0.15	5.96047e-09
0.0002984	0.146	0.006				0.0002984	0.156	0.002	0.0001492	0.146	-0.004				0.0005968	0.16	-0.001	0.0001492	0.2	-0.12	0.0001492	0.15	-0.002
0.0002988	0.146	0.002				0.0002988	0.156	0.002	0.0001494	0.146	0.004				0.0005976	0.158	-0.001	0.0001494	0.2	-0.116	0.0001494	0.146	5.96047e-09
0.0002992	0.146	0.004				0.0002992	0.152	-0.002	0.0001496	0.148	1.19209e-08				0.0005984	0.166	-0.001	0.0001496	0.202	-0.124	0.0001496	0.148	5.96047e-09
0.0002996	0.144	0.006				0.0002996	0.156	-0.002	0.0001498	0.146	1.19209e-08				0.0005992	0.16	-0.001	0.0001498	0.202	-0.12	0.0001498	0.144	5.96047e-09
0.0003	0.144	0.002				0.0003	0.152	0.002	0.00015	0.144	1.19209e-08				0.0006	0.16	-0.005	0.00015	0.204	-0.116	0.00015	0.146	-0.002
0.0003004	0.146	0.002				0.0003004	0.156	-0.002	0.0001502	0.148	1.19209e-08				0.0006008	0.162	0.000999995				0.0001502	0.144	5.96047e-09
0.0003008	0.148	0.002				0.0003008	0.148	0.002	0.0001504	0.15	1.19209e-08				0.0006016	0.16	-0.001				0.0001504	0.148	-0.002
0.0003012	0.148	0.004				0.0003012	0.148	0.002	0.0001506	0.148	-0.004				0.0006024	0.164	-0.001				0.0001506	0.15	5.96047e-09
0.0003016	0.144	0.004				0.0003016	0.152	0.002	0.0001508	0.148	1.19209e-08				0.0006032	0.162	0.000999995				0.0001508	0.148	5.96047e-09
0.000302	0.144	0.004				0.000302	0.16	-0.002	0.000151	0.146	1.19209e-08				0.000604	0.16	-0.001				0.000151	0.148	5.96047e-09
0.0003024	0.146	0.004				0.0003024	0.152	0.002	0.0001512	0.146	-0.004				0.0006048	0.16	-0.003				0.0001512	0.146	-0.002
0.0003028	0.148	0.002				0.0003028	0.152	0.002	0.0001514	0.146	1.19209e-08				0.0006056	0.158	0.000999995				0.0001514	0.144	5.96047e-09
0.0003032	0.148	0.004				0.0003032	0.148	-0.002	0.0001516	0.15	0.004				0.0006064	0.162	-0.001				0.0001516	0.146	5.96047e-09
0.0003036	0.148	0.004				0.0003036	0.16	0.002	0.0001518	0.146	0.004				0.0006072	0.16	-0.001				0.0001518	0.148	5.96047e-09
0.000304	0.148	0.004				0.000304	0.148	-0.002	0.000152	0.148	0.004				0.000608	0.16	0.000999995				0.000152	0.148	5.96047e-09
0.0003044	0.148	0.004				0.0003044	0.152	0.002	0.0001522	0.15	1.19209e-08				0.0006088	0.16	-0.001				0.0001522	0.148	5.96047e-09
0.0003048	0.144	0.006				0.0003048	0.14	0.002	0.0001524	0.148	-0.004				0.0006096	0.16	0.000999995				0.0001524	0.146	5.96047e-09
0.0003052	0.146	0.004				0.0003052	0.144	-0.002	0.0001526	0.148	1.19209e-08				0.0006104	0.16	-0.005				0.0001526	0.148	0.002
0.0003056	0.148	0.004				0.0003056	0.148	0.002	0.0001528	0.146	1.19209e-08				0.0006112	0.162	0.000999995				0.0001528	0.146	5.96047e-09
0.000306	0.146	0.004				0.000306	0.148	0.006	0.000153	0.148	-0.008				0.000612	0.158	-0.001				0.000153	0.148	-0.002
0.0003064	0.142	0.002				0.0003064	0.148	-0.002	0.0001532	0.148	1.19209e-08				0.0006128	0.16	-0.001				0.0001532	0.148	-0.002
0.0003068	0.146	0.004				0.0003068	0.148	0.002	0.0001534	0.15	1.19209e-08				0.0006136	0.158	0.000999995				0.0001534	0.148	5.96047e-09
0.0003072	0.15	0.004				0.0003072	0.148	-0.006	0.0001536	0.148	1.19209e-08				0.0006144	0.158	-0.001				0.0001536	0.148	5.96047e-09
0.0003076	0.146	0.004				0.0003076	0.152	0.002	0.0001538	0.148	1.19209e-08				0.0006152	0.158	-0.001				0.0001538	0.148	5.96047e-09
0.000308	0.146	0.004				0.000308	0.152	-0.006	0.000154	0.148	1.19209e-08				0.000616	0.156	-0.001				0.000154	0.146	5.96047e-09
0.0003084	0.148	0.002				0.0003084	0.152	-0.002	0.0001542	0.148	1.19209e-08				0.0006168	0.16	-0.001				0.0001542	0.15	5.96047e-09
0.0003088	0.146	0.006				0.0003088	0.152	-0.002	0.0001544	0.148	0.004				0.0006176	0.158	-0.001				0.0001544	0.15	5.96047e-09
0.0003092	0.144	0.004				0.0003092	0.148	-0.002	0.0001546	0.146	-0.004				0.0006184	0.158	-0.001				0.0001546	0.148	5.96047e-09
0.0003096	0.146	0.004				0.0003096	0.152	-0.002	0.0001548	0.146	1.19209e-08				0.0006192	0.158	-0.001				0.0001548	0.148	0.002
0.00031	0.148	0.002				0.00031	0.148	0.002	0.000155	0.15	1.19209e-08				0.00062	0.156	0.003				0.000155	0.148	0.002
0.0003104	0.146	0.004				0.0003104	0.148	0.002	0.0001552	0.146	0.004				0.0006208	0.158	0.000999995				0.0001552	0.146	5.96047e-09
0.0003108	0.146	0.002				0.0003108	0.152	-0.002	0.0001554	0.148	1.19209e-08				0.0006216	0.158	0.000999995				0.0001554	0.148	5.96047e-09
0.0003112	0.148	0.002				0.0003112	0.148	0.002	0.0001556	0.146	1.19209e-08				0.0006224	0.162	-0.001				0.0001556	0.148	0.002
0.0003116	0.146	0.006				0.0003116	0.148	0.006	0.0001558	0.148	1.19209e-08				0.0006232	0.162	0.000999995				0.0001558	0.148	-0.002
0.000312	0.146	0.002				0.000312	0.148	-0.002	0.000156	0.148	1.19209e-08				0.000624	0.16	-0.001				0.000156	0.146	5.96047e-09
0.0003124	0.15	0.004				0.0003124	0.148	0.006	0.0001562	0.148	0.004				0.0006248	0.16	-0.001				0.0001562	0.146	5.96047e-09
0.0003128	0.146	0.004				0.0003128	0.152	-0.002	0.0001564	0.146	-0.004				0.0006256	0.16	-0.001				0.0001564	0.146	-0.002
0.0003132	0.148	0.002				0.0003132	0.152	-0.002	0.0001566	0.144	0.004				0.0006264	0.158	-0.001				0.0001566	0.146	5.96047e-09
0.0003136	0.148	0.004				0.0003136	0.148	0.002	0.0001568	0.144	1.19209e-08				0.0006272	0.158	-0.001				0.0001568	0.148	0.002
0.000314	0.144	0.004				0.000314	0.152	0.006	0.000157	0.144	1.19209e-08				0.000628	0.162	-0.001				0.000157	0.148	5.96047e-09
0.0003144	0.144	0.004				0.0003144	0.156	0.002	0.0001572	0.148	1.19209e-08				0.0006288	0.16	-0.001				0.0001572	0.146	5.96047e-09
0.0003148	0.146	0.002				0.0003148	0.148	-0.002	0.0001574	0.146	1.19209e-08				0.0006296	0.158	-0.001				0.0001574	0.146	5.96047e-09
0.0003152	0.148	0.004				0.0003152	0.152	-0.002	0.0001576	0.148	1.19209e-08				0.0006304	0.16	-0.001				0.0001576	0.144	0.002
0.0003156	0.144	0.004				0.0003156	0.148	-0.002	0.0001578	0.148	0.004				0.0006312	0.158	-0.001				0.0001578	0.146	5.96047e-09
0.000316	0.146	5.96047e-09				0.000316	0.152	0.006	0.000158	0.146	-0.004				0.000632	0.16	-0.001				0.000158	0.148	5.96047e-09
0.0003164	0.148	0.004				0.0003164	0.148	-0.002	0.0001582	0.148	0.008				0.0006328	0.162	-0.001				0.0001582	0.146	5.96047e-09
0.0003168	0.144	0.006				0.0003168	0.148	0.002	0.0001584	0.146	1.19209e-08				0.0006336	0.162	-0.001				0.0001584	0.146	5.96047e-09
0.0003172	0.146	0.004				0.0003172	0.148	-0.006	0.0001586	0.148	-0.004				0.0006344	0.162	-0.001				0.0001586	0.144	0.002
0.0003176	0.15	5.96047e-09				0.0003176	0.152	-0.002	0.0001588	0.144	0.004				0.0006352	0.164	-0.003				0.0001588	0.144	5.96047e-09
0.000318	0.144	0.002				0.000318	0.148	0.002	0.000159	0.146	1.19209e-08				0.000636	0.16	0.000999995				0.000159	0.144	0.002
0.0003184	0.146	0.004				0.0003184	0.152	-0.002	0.0001592	0.144	-0.004				0.0006368	0.164	-0.001				0.0001592	0.146	0.002
0.0003188	0.148	0.002				0.0003188	0.148	0.002	0.0001594	0.144	0.004				0.0006376	0.162	-0.001				0.0001594	0.146	5.96047e-09
0.0003192	0.148	0.004				0.0003192	0.144	-0.002	0.0001596	0.146	1.19209e-08				0.0006384	0.16	-0.001				0.0001596	0.148	0.002
0.0003196	0.146	0.002				0.0003196	0.152	-0.002	0.0001598	0.146	0.004				0.0006392	0.16	-0.001				0.0001598	0.146	0.002
0.00032	0.146	0.004				0.00032	0.152	0.002	0.00016	0.144	1.19209e-08				0.00064	0.154	-0.003				0.00016	0.142	5.96047e-09
0.0003204	0.144	0.004				0.0003204	0.144	0.002	0.0001602	0.146	1.19209e-08				0.0006408	0.16	0.000999995				0.0001602	0.146	0.002
0.0003208	0.146	0.002				0.0003208	0.148	0.002	0.0001604	0.146	0.004				0.0006416	0.16	-0.001				0.0001604	0.146	5.96047e-09
0.0003212	0.146	0.004				0.0003212	0.152	0.002	0.0001606	0.146	1.19209e-08				0.0006424	0.16	-0.001				0.0001606	0.148	5.96047e-09
0.0003216	0.146	0.004				0.0003216	0.148	-0.006	0.0001608	0.148	0.004				0.0006432	0.162	-0.001				0.0001608	0.148	5.96047e-09
0.000322	0.144	0.002				0.000322	0.148	0.002	0.000161	0.144	-0.008				0.000644	0.16	-0.001				0.000161	0.144	0.002
0.0003224	0.146	0.002				0.0003224	0.144	-0.002	0.0001612	0.144	1.19209e-08				0.0006448	0.16	-0.001				0.0001612	0.144	0.002
0.0003228	0.148	0.004				0.0003228	0.148	0.002	0.0001614	0.148	1.19209e-08				0.0006456	0.162	-0.001				0.0001614	0.14	0.002
0.0003232	0.146	0.006				0.0003232	0.148	-0.002	0.0001616	0.148	-0.004				0.0006464	0.16	0.000999995				0.0001616	0.146	5.96047e-09
0.0003236	0.144	0.004				0.0003236	0.144	0.002	0.0001618	0.148	1.19209e-08				0.0006472	0.16	-0.001				0.0001618	0.148	0.002
0.000324	0.148	0.004				0.000324	0.152	-0.002	0.000162	0.148	-0.004				0.000648	0.16	-0.001				0.000162	0.148	5.96047e-09
0.0003244	0.15	0.004				0.0003244	0.148	0.002	0.0001622	0.148	1.19209e-08				0.0006488	0.164	0.000999995				0.0001622	0.146	0.002
0.0003248	0.148	0.002				0.0003248	0.148	0.002	0.0001624	0.146	1.19209e-08				0.0006496	0.16	-0.001				0.0001624	0.146	0.002
0.0003252	0.148	0.004				0.0003252	0.152	-0.002	0.0001626	0.144	1.19209e-08				0.0006504	0.158	-0.003				0.0001626	0.142	0.004
0.0003256	0.146	0.004				0.0003256	0.148	-0.002	0.0001628	0.146	0.004				0.0006512	0.16	-0.001				0.0001628	0.144	0.002
0.000326	0.144	0.004				0.000326	0.144	-0.002	0.000163	0.152	1.19209e-08				0.000652	0.162	-0.001				0.000163	0.146	5.96047e-09
0.0003264	0.146	0.002				0.0003264	0.148	0.002	0.0001632	0.148	1.19209e-08				0.0006528	0.162	-0.001				0.0001632	0.148	0.002
0.0003268	0.148	0.004				0.0003268	0.148	-0.002	0.0001634	0.148	1.19209e-08				0.0006536	0.164	-0.001				0.0001634	0.15	5.96047e-09
0.0003272	0.148	0.002				0.0003272	0.148	-0.002	0.0001636	0.152	-0.004				0.0006544	0.164	-0.003				0.0001636	0.148	0.002
0.0003276	0.148	0.004				0.0003276	0.144	-0.002	0.0001638	0.15	1.19209e-08				0.0006552	0.162	-0.001				0.0001638	0.148	0.004
0.000328	0.146	0.002				0.000328	0.148	-0.002	0.000164	0.15	0.004				0.000656	0.162	-0.001				0.000164	0.146	0.002
0.0003284	0.148	0.004				0.0003284	0.144	-0.002	0.0001642	0.15	1.19209e-08				0.0006568	0.162	-0.001				0.0001642	0.146	0.002
0.0003288	0.148	0.006				0.0003288	0.148	-0.002	0.0001644	0.15	0.004				0.0006576	0.166	-0.001				0.0001644	0.15	5.96047e-09
0.0003292	0.148	0.004				0.0003292	0.152	-0.002	0.0001646	0.152	1.19209e-08				0.0006584	0.16	-0.001				0.0001646	0.148	0.004
0.0003296	0.146	0.004				0.0003296	0.152	0.002	0.0001648	0.152	1.19209e-08				0.0006592	0.166	-0.001				0.0001648	0.148	0.002
0.00033	0.15	0.004				0.00033	0.148	0.006	0.000165	0.154	1.19209e-08				0.00066	0.164	-0.001				0.000165	0.146	0.002
0.0003304	0.15	0.006				0.0003304	0.148	0.002	0.0001652	0.154	1.19209e-08				0.0006608	0.162	-0.001				0.0001652	0.148	0.002
0.0003308	0.144	0.006				0.0003308	0.144	-0.002	0.0001654	0.152	-0.004				0.0006616	0.162	0.000999995				0.0001654	0.146	0.004
0.0003312	0.148	0.002				0.0003312	0.152	-0.002	0.0001656	0.152	1.19209e-08				0.0006624	0.16	-0.001				0.0001656	0.148	0.002
0.0003316	0.15	0.004				0.0003316	0.148	-0.002	0.0001658	0.15	1.19209e-08				0.0006632	0.162	-0.001				0.0001658	0.15	0.002
0.000332	0.15	0.004				0.000332	0.152	-0.002	0.000166	0.152	1.19209e-08				0.000664	0.162	0.000999995				0.000166	0.15	0.002
0.0003324	0.146	0.006				0.0003324	0.148	0.002	0.0001662	0.15	1.19209e-08				0.0006648	0.162	-0.001				0.0001662	0.146	0.002
0.0003328	0.148	0.004				0.0003328	0.148	0.002	0.0001664	0.152	-0.008				0.0006656	0.162	-0.005				0.0001664	0.146	0.002
0.0003332	0.146	0.004				0.0003332	0.148	0.002	0.0001666	0.154	-0.008				0.0006664	0.158	-0.003				0.0001666	0.148	5.96047e-09
0.0003336	0.148	0.004				0.0003336	0.148	-0.002	0.0001668	0.152	1.19209e-08				0.0006672	0.162	-0.001				0.0001668	0.148	0.002
0.000334	0.148	0.004				0.000334	0.156	-0.006	0.000167	0.152	1.19209e-08				0.000668	0.162	0.000999995				0.000167	0.152	0.002
0.0003344	0.148	0.004				0.0003344	0.148	-0.002	0.0001672	0.152	1.19209e-08				0.0006688	0.158	-0.001				0.0001672	0.15	0.002
0.0003348	0.146	0.004				0.0003348	0.144	0.002	0.0001674	0.152	1.19209e-08				0.0006696	0.16	0.000999995				0.0001674	0.15	0.002
0.0003352	0.148	0.002				0.0003352	0.148	0.002	0.0001676	0.152	1.19209e-08				0.0006704	0.16	0.000999995				0.0001676	0.15	0.004
0.0003356	0.15	0.002				0.0003356	0.152	-0.002	0.0001678	0.152	-0.008				0.0006712	0.16	-0.003				0.0001678	0.144	0.004
0.000336	0.15	0.002				0.000336	0.152	0.002	0.000168	0.154	-0.004				0.000672	0.16	-0.001				0.000168	0.148	0.002
0.0003364	0.148	0.004				0.0003364	0.152	0.002	0.0001682	0.154	-0.008				0.0006728	0.158	-0.001				0.0001682	0.146	0.002
0.0003368	0.148	0.004				0.0003368	0.152	-0.002	0.0001684	0.152	-0.004				0.0006736	0.16	-0.001				0.0001684	0.15	0.002
0.0003372	0.146	0.002				0.0003372	0.144	0.002	0.0001686	0.154	-0.004				0.0006744	0.158	-0.001				0.0001686	0.148	0.002
0.0003376	0.15	0.006				0.0003376	0.148	0.002	0.0001688	0.152	-0.004				0.0006752	0.158	-0.001				0.0001688	0.148	0.004
0.000338	0.148	0.006				0.000338	0.144	0.002	0.000169	0.15	-0.004				0.000676	0.16	-0.003				0.000169	0.146	0.002
0.0003384	0.148	0.002				0.0003384	0.152	-0.002	0.0001692	0.152	-0.008				0.0006768	0.16	-0.001				0.0001692	0.15	0.002
0.0003388	0.148	0.004				0.0003388	0.148	-0.002	0.0001694	0.152	-0.004				0.0006776	0.156	-0.001				0.0001694	0.15	0.002
0.0003392	0.148	0.004				0.0003392	0.152	0.002	0.0001696	0.152	-0.012				0.0006784	0.158	-0.003				0.0001696	0.152	0.002
0.0003396	0.148	0.002				0.0003396	0.148	-0.002	0.0001698	0.152	-0.004				0.0006792	0.16	0.000999995				0.0001698	0.148	0.006
0.00034	0.148	0.004				0.00034	0.152	-0.006	0.00017	0.152	-0.004				0.00068	0.162	-0.001				0.00017	0.148	0.002
0.0003404	0.146	0.004				0.0003404	0.152	-0.002	0.0001702	0.152	-0.008				0.0006808	0.158	-0.001				0.0001702	0.148	0.004
0.0003408	0.148	0.002				0.0003408	0.148	0.002	0.0001704	0.15	-0.004				0.0006816	0.16	-0.001				0.0001704	0.148	0.002
0.0003412	0.146	0.004				0.0003412	0.152	0.006	0.0001706	0.15	-0.004				0.0006824	0.156	-0.001				0.0001706	0.15	0.002
0.0003416	0.146	0.004				0.0003416	0.152	0.002	0.0001708	0.15	-0.008				0.0006832	0.158	-0.001				0.0001708	0.148	0.002
0.000342	0.148	0.002				0.000342	0.152	-0.002	0.000171	0.15	1.19209e-08				0.000684	0.158	-0.001				0.000171	0.15	0.004
0.0003424	0.144	0.006				0.0003424	0.152	0.002	0.0001712	0.15	-0.004				0.0006848	0.154	-0.001				0.0001712	0.148	0.004
0.0003428	0.146	0.004				0.0003428	0.156	0.002	0.0001714	0.15	-0.008				0.0006856	0.158	-0.001				0.0001714	0.148	0.002
0.0003432	0.148	0.002				0.0003432	0.152	-0.002	0.0001716	0.15	-0.004				0.0006864	0.16	-0.001				0.0001716	0.148	0.002
0.0003436	0.148	0.004				0.0003436	0.148	0.002	0.0001718	0.15	0.008				0.0006872	0.158	-0.001				0.0001718	0.15	0.004
0.000344	0.142	0.006				0.000344	0.148	-0.002	0.000172	0.148	-0.008				0.000688	0.16	0.000999995				0.000172	0.15	0.002
0.0003444	0.144	0.004				0.0003444	0.148	0.002	0.0001722	0.15	1.19209e-08				0.0006888	0.16	-0.001				0.0001722	0.152	5.96047e-09
0.0003448	0.144	0.004				0.0003448	0.148	0.002	0.0001724	0.148	-0.008				0.0006896	0.16	-0.001				0.0001724	0.148	0.002
0.0003452	0.146	0.004				0.0003452	0.144	0.002	0.0001726	0.15	1.19209e-08				0.0006904	0.158	-0.001				0.0001726	0.148	0.004
0.0003456	0.146	0.002				0.0003456	0.152	0.006	0.0001728	0.148	-0.008				0.0006912	0.16	-0.003				0.0001728	0.148	0.002
0.000346	0.144	0.006				0.000346	0.152	0.002	0.000173	0.152	-0.004				0.000692	0.16	-0.001				0.000173	0.148	0.002
0.0003464	0.146	0.002				0.0003464	0.148	0.002	0.0001732	0.152	-0.004				0.0006928	0.16	-0.001				0.0001732	0.148	0.002
0.0003468	0.144	0.002				0.0003468	0.148	-0.002	0.0001734	0.15	1.19209e-08				0.0006936	0.162	-0.001				0.0001734	0.15	0.004
0.0003472	0.146	0.004				0.0003472	0.152	-0.002	0.0001736	0.15	1.19209e-08				0.0006944	0.16	-0.001				0.0001736	0.15	0.002
0.0003476	0.146	0.004				0.0003476	0.144	-0.002	0.0001738	0.15	-0.008				0.0006952	0.158	-0.001				0.0001738	0.15	0.004
0.000348	0.146	0.004				0.000348	0.152	-0.002	0.000174	0.148	-0.008				0.000696	0.162	0.000999995				0.000174	0.148	0.002
0.0003484	0.144	0.004				0.0003484	0.152	-0.002	0.0001742	0.15	-0.012				0.0006968	0.162	-0.001				0.0001742	0.15	0.006
0.0003488	0.146	0.004				0.0003488	0.152	-0.002	0.0001744	0.15	-0.008				0.0006976	0.162	-0.001				0.0001744	0.15	5.96047e-09
0.0003492	0.146	0.004				0.0003492	0.156	-0.002	0.0001746	0.152	-0.008				0.0006984	0.162	-0.001				0.0001746	0.15	0.002
0.0003496	0.148	0.002				0.0003496	0.152	-0.002	0.0001748	0.152	-0.004				0.0006992	0.16	-0.001				0.0001748	0.15	0.002
0.00035	0.146	0.004				0.00035	0.148	0.002	0.000175	0.15	-0.008				0.0007	0.16	-0.005				0.000175	0.15	0.004
0.0003504	0.146	0.004				0.0003504	0.144	-0.002	0.0001752	0.154	-0.008				0.0007008	0.16	-0.001				0.0001752	0.15	0.004
0.0003508	0.144	0.006				0.0003508	0.152	0.002	0.0001754	0.152	-0.008				0.0007016	0.162	-0.001				0.0001754	0.15	0.002
0.0003512	0.146	0.004				0.0003512	0.144	0.002	0.0001756	0.152	-0.004				0.0007024	0.156	-0.001				0.0001756	0.15	0.004
0.0003516	0.148	0.002				0.0003516	0.148	0.006	0.0001758	0.152	-0.008				0.0007032	0.162	-0.001				0.0001758	0.15	0.006
0.000352	0.144	0.002				0.000352	0.148	0.006	0.000176	0.152	-0.008				0.000704	0.16	0.000999995				0.000176	0.152	0.002
0.0003524	0.148	0.004				0.0003524	0.152	0.01	0.0001762	0.154	-0.012				0.0007048	0.16	0.000999995				0.0001762	0.152	0.006
0.0003528	0.148	0.004				0.0003528	0.148	0.002	0.0001764	0.154	-0.004				0.0007056	0.16	-0.001				0.0001764	0.15	0.002
0.0003532	0.146	0.002				0.0003532	0.148	-0.002	0.0001766	0.152	-0.004				0.0007064	0.158	-0.001				0.0001766	0.152	0.002
0.0003536	0.146	0.004				0.0003536	0.148	0.002	0.0001768	0.154	-0.008				0.0007072	0.158	-0.001				0.0001768	0.152	0.002
0.000354	0.146	0.002				0.000354	0.148	0.002	0.000177	0.154	-0.008				0.000708	0.158	-0.001				0.000177	0.152	0.002
0.0003544	0.144	0.004				0.0003544	0.148	0.002	0.0001772	0.154	-0.004				0.0007088	0.158	-0.001				0.0001772	0.15	0.002
0.0003548	0.146	0.004				0.0003548	0.144	-0.002	0.0001774	0.154	-0.004				0.0007096	0.158	0.000999995				0.0001774	0.15	0.002
0.0003552	0.146	0.006				0.0003552	0.148	-0.002	0.0001776	0.152	-0.008				0.0007104	0.158	-0.003				0.0001776	0.15	0.004
0.0003556	0.144	0.004				0.0003556	0.152	0.002	0.0001778	0.152	1.19209e-08				0.0007112	0.16	-0.001				0.0001778	0.148	0.004
0.000356	0.146	0.004				0.000356	0.148	0.002	0.000178	0.154	-0.004				0.000712	0.158	0.000999995				0.000178	0.148	0.004
0.0003564	0.144	0.006				0.0003564	0.144	-0.006	0.0001782	0.154	-0.012				0.0007128	0.16	-0.003				0.0001782	0.148	0.002
0.0003568	0.144	0.004				0.0003568	0.148	0.006	0.0001784	0.152	-0.004				0.0007136	0.158	-0.001				0.0001784	0.148	0.004
0.0003572	0.146	0.002				0.0003572	0.148	0.002	0.0001786	0.156	-0.004				0.0007144	0.16	0.000999995				0.0001786	0.15	0.002
0.0003576	0.148	0.002				0.0003576	0.148	-0.002	0.0001788	0.154	-0.004				0.0007152	0.16	-0.001				0.0001788	0.146	0.004
0.000358	0.144	0.006				0.000358	0.14	-0.002	0.000179	0.152	1.19209e-08				0.000716	0.158	-0.001				0.000179	0.148	0.004
0.0003584	0.146	0.004				0.0003584	0.148	-0.002	0.0001792	0.156	-0.004				0.0007168	0.162	-0.003				0.0001792	0.15	0.004
0.0003588	0.148	0.002				0.0003588	0.148	0.002	0.0001794	0.156	-0.008				0.0007176	0.16	-0.001				0.0001794	0.15	0.006
0.0003592	0.148	0.004				0.0003592	0.152	0.002	0.0001796	0.154	-0.008				0.0007184	0.162	0.000999995				0.0001796	0.152	0.004
0.0003596	0.146	0.004				0.0003596	0.156	0.006	0.0001798	0.156	-0.008				0.0007192	0.16	-0.001				0.0001798	0.152	5.96047e-09
0.00036	0.144	0.004				0.00036	0.148	0.002	0.00018	0.156	-0.028				0.00072	0.16	-0.001				0.00018	0.15	0.002
0.0003604	0.146	0.002				0.0003604	0.148	0.002	0.0001802	0.154	-0.032				0.0007208	0.162	-0.001				0.0001802	0.15	0.002
0.0003608	0.144	0.004				0.0003608	0.14	-0.002	0.0001804	0.154	-0.032				0.0007216	0.16	-0.001				0.0001804	0.152	0.002
0.0003612	0.146	0.002				0.0003612	0.144	-0.002	0.0001806	0.154	-0.024				0.0007224	0.162	-0.001				0.0001806	0.148	0.002
0.0003616	0.146	0.002				0.0003616	0.144	-0.002	0.0001808	0.156	-0.028				0.0007232	0.162	-0.001				0.0001808	0.152	0.002
0.000362	0.144	0.002				0.000362	0.152	0.002	0.000181	0.154	-0.032				0.000724	0.166	0.000999995				0.000181	0.15	0.002
0.0003624	0.144	0.002				0.0003624	0.152	-0.002	0.0001812	0.152	-0.032				0.0007248	0.164	-0.001				0.0001812	0.148	0.006
0.0003628	0.144	0.002				0.0003628	0.148	-0.002	0.0001814	0.154	-0.028				0.0007256	0.162	-0.001				0.0001814	0.146	0.004
0.0003632	0.144	0.002				0.0003632	0.152	-0.002	0.0001816	0.152	-0.028				0.0007264	0.164	-0.001				0.0001816	0.148	-0.028
0.0003636	0.142	0.002				0.0003636	0.148	0.006	0.0001818	0.154	-0.032				0.0007272	0.164	-0.001				0.0001818	0.146	-0.022
0.000364	0.144	0.004				0.000364	0.148	-0.002	0.000182	0.156	-0.032				0.000728	0.162	-0.001				0.000182	0.146	-0.02
0.0003644	0.148	0.004				0.0003644	0.152	-0.002	0.0001822	0.156	-0.028				0.0007288	0.162	-0.003				0.0001822	0.148	-0.02
0.0003648	0.146	0.002				0.0003648	0.144	-0.002	0.0001824	0.154	-0.036				0.0007296	0.162	-0.001				0.0001824	0.15	-0.02
0.0003652	0.146	0.006				0.0003652	0.152	0.006	0.0001826	0.15	-0.028				0.0007304	0.164	-0.001				0.0001826	0.15	-0.018
0.0003656	0.144	0.006				0.0003656	0.152	-0.002	0.0001828	0.156	-0.02				0.0007312	0.162	-0.001				0.0001828	0.146	-0.018
0.000366	0.142	0.002				0.000366	0.144	-0.002	0.000183	0.156	-0.024				0.000732	0.162	0.003				0.000183	0.146	-0.016
0.0003664	0.15	0.002				0.0003664	0.148	0.002	0.0001832	0.154	-0.028				0.0007328	0.162	-0.003				0.0001832	0.146	-0.016
0.0003668	0.148	0.004				0.0003668	0.148	0.002	0.0001834	0.152	-0.024				0.0007336	0.164	-0.001				0.0001834	0.146	-0.018
0.0003672	0.144	0.004				0.0003672	0.148	-0.002	0.0001836	0.154	-0.016				0.0007344	0.162	-0.001				0.0001836	0.148	-0.018
0.0003676	0.146	0.004				0.0003676	0.152	-0.002	0.0001838	0.154	-0.016				0.0007352	0.162	-0.001				0.0001838	0.15	-0.018
0.000368	0.146	0.006				0.000368	0.148	0.002	0.000184	0.156	-0.028				0.000736	0.164	-0.001				0.000184	0.152	-0.018
0.0003684	0.146	0.004				0.0003684	0.148	0.002	0.0001842	0.156	-0.028				0.0007368	0.164	-0.001				0.0001842	0.15	-0.018
0.0003688	0.146	0.004				0.0003688	0.152	-0.006	0.0001844	0.154	-0.024				0.0007376	0.16	-0.001				0.0001844	0.148	-0.014
0.0003692	0.148	0.004				0.0003692	0.156	-0.002	0.0001846	0.156	-0.02				0.0007384	0.162	0.003				0.0001846	0.15	-0.014
0.0003696	0.144	0.006				0.0003696	0.152	0.002	0.0001848	0.156	-0.024				0.0007392	0.162	-0.001				0.0001848	0.15	-0.018
0.00037	0.148	0.002				0.00037	0.152	-0.002	0.000185	0.156	-0.02				0.00074	0.162	-0.001				0.000185	0.148	-0.014
0.0003704	0.148	0.004				0.0003704	0.152	-0.002	0.0001852	0.154	-0.024				0.0007408	0.162	0.000999995				0.0001852	0.146	-0.016
0.0003708	0.144	0.006				0.0003708	0.156	-0.002	0.0001854	0.156	-0.02				0.0007416	0.158	-0.001				0.0001854	0.148	-0.014
0.0003712	0.142	0.002				0.0003712	0.148	0.006	0.0001856	0.156	-0.012				0.0007424	0.164	-0.001				0.0001856	0.146	-0.014
0.0003716	0.146	0.002				0.0003716	0.156	-0.002	0.0001858	0.154	-0.024				0.0007432	0.162	-0.001				0.0001858	0.146	-0.014
0.000372	0.148	0.004				0.000372	0.152	0.002	0.000186	0.158	-0.02				0.000744	0.162	-0.001				0.000186	0.146	-0.016
0.0003724	0.148	0.004				0.0003724	0.16	0.002	0.0001862	0.156	-0.02				0.0007448	0.164	-0.003				0.0001862	0.148	-0.014
0.0003728	0.148	0.004				0.0003728	0.156	-0.002	0.0001864	0.158	-0.016				0.0007456	0.166	-0.001				0.0001864	0.148	-0.016
0.0003732	0.146	0.006				0.0003732	0.152	-0.002	0.0001866	0.156	-0.044				0.0007464	0.166	0.000999995				0.0001866	0.152	-0.014
0.0003736	0.142	0.004				0.0003736	0.156	0.002	0.0001868	0.158	-0.04				0.0007472	0.164	-0.001				0.0001868	0.148	-0.012
0.000374	0.15	0.002				0.000374	0.156	-0.002	0.000187	0.158	-0.036				0.000748	0.164	-0.001				0.000187	0.148	-0.012
0.0003744	0.15	0.006				0.0003744	0.148	0.002	0.0001872	0.158	-0.036				0.0007488	0.16	-0.001				0.0001872	0.146	-0.014
0.0003748	0.146	0.002				0.0003748	0.152	-0.002	0.0001874	0.158	-0.04				0.0007496	0.162	-0.001				0.0001874	0.15	-0.012
0.0003752	0.146	0.002				0.0003752	0.152	-0.002	0.0001876	0.158	-0.048				0.0007504	0.16	-0.001				0.0001876	0.148	-0.014
0.0003756	0.146	0.004				0.0003756	0.152	0.002	0.0001878	0.162	-0.036				0.0007512	0.162	-0.003				0.0001878	0.15	-0.014
0.000376	0.148	0.004				0.000376	0.156	0.002	0.000188	0.158	-0.044				0.000752	0.16	0.000999995				0.000188	0.148	-0.01
0.0003764	0.148	0.004				0.0003764	0.148	0.002	0.0001882	0.16	-0.052				0.0007528	0.164	-0.003				0.0001882	0.148	-0.01
0.0003768	0.146	0.006				0.0003768	0.152	0.01	0.0001884	0.158	-0.048				0.0007536	0.162	-0.001				0.0001884	0.15	-0.014
0.0003772	0.146	0.01				0.0003772	0.148	-0.002	0.0001886	0.162	-0.052				0.0007544	0.166	-0.003				0.0001886	0.146	-0.01
0.0003776	0.148	0.006				0.0003776	0.156	0.002	0.0001888	0.158	-0.048				0.0007552	0.164	-0.001				0.0001888	0.148	-0.01
0.000378	0.146	0.006				0.000378	0.156	0.006	0.000189	0.16	-0.056				0.000756	0.162	-0.003				0.000189	0.148	-0.01
0.0003784	0.142	0.004				0.0003784	0.156	0.002	0.0001892	0.162	-0.052				0.0007568	0.162	-0.001				0.0001892	0.144	-0.008
0.0003788	0.144	0.002				0.0003788	0.156	0.006	0.0001894	0.16	-0.052				0.0007576	0.162	-0.001				0.0001894	0.146	-0.01
0.0003792	0.148	0.004				0.0003792	0.148	-0.002	0.0001896	0.16	-0.048				0.0007584	0.164	-0.001				0.0001896	0.148	-0.008
0.0003796	0.148	0.004				0.0003796	0.152	-0.002	0.0001898	0.16	-0.052				0.0007592	0.164	-0.001				0.0001898	0.15	-0.012
0.00038	0.142	0.004				0.00038	0.152	-0.006	0.00019	0.158	-0.052				0.00076	0.162	0.003				0.00019	0.15	-0.01
0.0003804	0.146	0.004				0.0003804	0.152	-0.002	0.0001902	0.16	-0.052				0.0007608	0.164	0.000999995				0.0001902	0.148	-0.008
0.0003808	0.146	0.002				0.0003808	0.152	0.006	0.0001904	0.16	-0.04				0.0007616	0.164	0.000999995				0.0001904	0.148	-0.008
0.0003812	0.144	0.004				0.0003812	0.148	0.002	0.0001906	0.16	-0.052				0.0007624	0.164	-0.001				0.0001906	0.148	-0.008
0.0003816	0.148	0.004				0.0003816	0.152	0.006	0.0001908	0.16	-0.048				0.0007632	0.16	-0.001				0.0001908	0.146	-0.008
0.000382	0.146	0.004				0.000382	0.152	-0.006	0.000191	0.16	-0.044				0.000764	0.162	-0.001				0.000191	0.146	-0.008
0.0003824	0.144	0.006				0.0003824	0.16	0.006	0.0001912	0.16	-0.044				0.0007648	0.164	-0.001				0.0001912	0.148	-0.006
0.0003828	0.142	0.002				0.0003828	0.156	0.002	0.0001914	0.16	-0.052				0.0007656	0.162	0.000999995				0.0001914	0.15	-0.006
0.0003832	0.148	0.004				0.0003832	0.148	-0.002	0.0001916	0.162	-0.064				0.0007664	0.164	-0.001				0.0001916	0.146	-0.008
0.0003836	0.146	0.004				0.0003836	0.156	-0.002	0.0001918	0.162	-0.06				0.0007672	0.164	0.000999995				0.0001918	0.148	-0.01
0.000384	0.144	0.002				0.000384	0.152	-0.002	0.000192	0.162	-0.064				0.000768	0.166	-0.001				0.000192	0.148	-0.008
0.0003844	0.144	0.004				0.0003844	0.152	0.002	0.0001922	0.162	-0.068				0.0007688	0.164	-0.001				0.0001922	0.15	-0.006
0.0003848	0.144	0.006				0.0003848	0.152	0.002	0.0001924	0.162	-0.072				0.0007696	0.168	0.000999995				0.0001924	0.148	-0.006
0.0003852	0.146	0.004				0.0003852	0.156	0.002	0.0001926	0.164	-0.092				0.0007704	0.168	-0.001				0.0001926	0.15	-0.008
0.0003856	0.15	0.004				0.0003856	0.152	0.006	0.0001928	0.158	-0.096				0.0007712	0.168	-0.003				0.0001928	0.15	-0.006
0.000386	0.144	0.006				0.000386	0.152	0.006	0.000193	0.162	-0.096				0.000772	0.17	-0.001				0.000193	0.148	-0.004
0.0003864	0.142	0.004				0.0003864	0.156	0.002	0.0001932	0.162	-0.088				0.0007728	0.17	-0.003				0.0001932	0.15	-0.008
0.0003868	0.146	0.004				0.0003868	0.152	0.006	0.0001934	0.16	-0.092				0.0007736	0.17	-0.001				0.0001934	0.148	-0.008
0.0003872	0.146	0.004				0.0003872	0.152	0.006	0.0001936	0.162	-0.12				0.0007744	0.172	-0.001				0.0001936	0.148	-0.006
0.0003876	0.146	0.002				0.0003876	0.156	0.002	0.0001938	0.16	-0.104				0.0007752	0.174	-0.001				0.0001938	0.144	-0.004
0.000388	0.148	0.004				0.000388	0.156	0.006	0.000194	0.16	-0.1				0.000776	0.17	-0.001				0.000194	0.144	-0.006
0.0003884	0.148	0.004				0.0003884	0.152	-0.002	0.0001942	0.16	-0.128				0.0007768	0.17	-0.001				0.0001942	0.144	-0.004
0.0003888	0.144	0.004				0.0003888	0.152	0.002	0.0001944	0.16	-0.108				0.0007776	0.17	-0.001				0.0001944	0.148	-0.006
0.0003892	0.146	0.004				0.0003892	0.156	-0.002	0.0001946	0.16	-0.116				0.0007784	0.166	0.000999995				0.0001946	0.15	-0.008
0.0003896	0.148	0.004				0.0003896	0.152	-0.002	0.0001948	0.162	-0.132				0.0007792	0.168	0.003				0.0001948	0.15	-0.006
0.00039	0.146	0.004				0.00039	0.152	-0.002	0.000195	0.164	-0.128				0.00078	0.17	-0.001				0.000195	0.15	-0.004
0.0003904	0.146	0.004				0.0003904	0.148	0.002	0.0001952	0.162	-0.132				0.0007808	0.168	-0.003				0.0001952	0.15	-0.006
0.0003908	0.146	0.004				0.0003908	0.156	0.002	0.0001954	0.162	-0.136				0.0007816	0.168	-0.001				0.0001954	0.146	-0.006
0.0003912	0.146	0.004				0.0003912	0.16	0.002	0.0001956	0.164	-0.148				0.0007824	0.166	-0.003				0.0001956	0.148	-0.006
0.0003916	0.146	0.004				0.0003916	0.156	-0.002	0.0001958	0.16	-0.14				0.0007832	0.166	-0.001				0.0001958	0.148	-0.004
0.000392	0.146	0.004				0.000392	0.156	-0.002	0.000196	0.16	-0.136				0.000784	0.166	-0.003				0.000196	0.148	-0.008
0.0003924	0.146	0.002				0.0003924	0.156	-0.002	0.0001962	0.16	-0.148				0.0007848	0.166	0.000999995				0.0001962	0.146	-0.006
0.0003928	0.148	0.004				0.0003928	0.152	0.006	0.0001964	0.16	-0.14				0.0007856	0.166	0.000999995				0.0001964	0.148	-0.004
0.0003932	0.148	0.004				0.0003932	0.16	0.006	0.0001966	0.16	-0.148				0.0007864	0.166	-0.001				0.0001966	0.15	-0.006
0.0003936	0.146	0.004				0.0003936	0.156	0.006	0.0001968	0.16	-0.144				0.0007872	0.166	-0.001				0.0001968	0.15	-0.006
0.000394	0.148	0.002				0.000394	0.156	-0.002	0.000197	0.162	-0.14				0.000788	0.166	-0.001				0.000197	0.148	-0.004
0.0003944	0.15	0.004				0.0003944	0.152	0.002	0.0001972	0.162	-0.14				0.0007888	0.166	-0.001				0.0001972	0.148	-0.006
0.0003948	0.146	0.004				0.0003948	0.152	-0.002	0.0001974	0.164	-0.152				0.0007896	0.166	-0.001				0.0001974	0.148	-0.004
0.0003952	0.146	0.004				0.0003952	0.16	-0.002	0.0001976	0.16	-0.172				0.0007904	0.166	-0.001				0.0001976	0.144	-0.004
0.0003956	0.148	0.004				0.0003956	0.16	-0.002	0.0001978	0.162	-0.172				0.0007912	0.164	-0.001				0.0001978	0.144	-0.002
0.000396	0.148	0.004				0.000396	0.164	-0.002	0.000198	0.162	-0.172				0.000792	0.168	-0.001				0.000198	0.148	-0.004
0.0003964	0.144	0.004				0.0003964	0.152	0.006	0.0001982	0.16	-0.192				0.0007928	0.164	-0.003				0.0001982	0.148	-0.002
0.0003968	0.146	0.004				0.0003968	0.16	0.006	0.0001984	0.158	-0.2				0.0007936	0.164	-0.001				0.0001984	0.146	-0.002
0.0003972	0.146	0.002				0.0003972	0.156	0.006	0.0001986	0.164	-0.196				0.0007944	0.166	-0.001				0.0001986	0.146	-0.004
0.0003976	0.148	0.002				0.0003976	0.16	-0.002	0.0001988	0.16	-0.188				0.0007952	0.166	-0.001				0.0001988	0.148	-0.004
0.000398	0.146	0.002				0.000398	0.156	0.002	0.000199	0.164	-0.208				0.000796	0.166	0.000999995				0.000199	0.144	-0.002
0.0003984	0.146	0.004				0.0003984	0.156	-0.002	0.0001992	0.164	-0.208				0.0007968	0.166	-0.001				0.0001992	0.146	-0.002
0.0003988	0.142	0.008				0.0003988	0.168	0.002	0.0001994	0.166	-0.208				0.0007976	0.168	-0.001				0.0001994	0.148	-0.002
0.0003992	0.142	0.006				0.0003992	0.156	0.002	0.0001996	0.162	-0.2				0.0007984	0.166	-0.003				0.0001996	0.15	-0.004
0.0003996	0.148	0.002				0.0003996	0.156	-0.002	0.0001998	0.162	-0.196				0.0007992	0.166	-0.005				0.0001998	0.15	5.96047e-09
0.0004	0.148	0.004				0.0004	0.156	0.006	0.0002	0.162	-0.196				0.0008	0.166	0.000999995				0.0002	0.146	-0.002
0.0004004	0.146	0.006				0.0004004	0.148	0.002	0.0002002	0.162	-0.192				0.0008008	0.168	-0.003				0.0002002	0.146	5.96047e-09
0.0004008	0.146	0.002				0.0004008	0.164	-0.002	0.0002004	0.164	-0.212				0.0008016	0.168	-0.001				0.0002004	0.144	-0.002
0.0004012	0.146	0.004				0.0004012	0.16	-0.002	0.0002006	0.164	-0.224				0.0008024	0.164	-0.001				0.0002006	0.146	-0.004
0.0004016	0.148	0.004				0.0004016	0.16	0.002	0.0002008	0.164	-0.224				0.0008032	0.166	-0.001				0.0002008	0.148	-0.004
0.000402	0.148	0.002				0.000402	0.16	-0.006	0.000201	0.166	-0.22				0.000804	0.166	-0.001				0.000201	0.146	-0.002
0.0004024	0.146	0.004				0.0004024	0.156	-0.002	0.0002012	0.166	-0.224				0.0008048	0.166	-0.003				0.0002012	0.148	-0.002
0.0004028	0.144	0.004				0.0004028	0.156	-0.002	0.0002014	0.166	-0.224				0.0008056	0.164	-0.003				0.0002014	0.146	5.96047e-09
0.0004032	0.148	0.002				0.0004032	0.156	-0.002	0.0002016	0.164	-0.216				0.0008064	0.164	-0.001				0.0002016	0.148	5.96047e-09
0.0004036	0.15	0.004				0.0004036	0.156	0.002	0.0002018	0.166	-0.208				0.0008072	0.166	-0.003				0.0002018	0.146	-0.002
0.000404	0.146	0.006				0.000404	0.156	-0.002	0.000202	0.164	-0.204				0.000808	0.164	-0.001				0.000202	0.146	-0.002
0.0004044	0.146	0.002				0.0004044	0.156	0.002	0.0002022	0.164	-0.212				0.0008088	0.164	-0.001				0.0002022	0.146	-0.002
0.0004048	0.146	0.004				0.0004048	0.156	-0.002	0.0002024	0.162	-0.216				0.0008096	0.168	-0.001				0.0002024	0.148	5.96047e-09
0.0004052	0.144	0.006				0.0004052	0.16	0.002	0.0002026	0.166	-0.22				0.0008104	0.164	-0.001				0.0002026	0.146	-0.002
0.0004056	0.144	0.004				0.0004056	0.156	0.002	0.0002028	0.168	-0.224				0.0008112	0.164	-0.003				0.0002028	0.146	-0.002
0.000406	0.15	0.006				0.000406	0.16	-0.002	0.000203	0.166	-0.228				0.000812	0.166	-0.001				0.000203	0.144	-0.002
0.0004064	0.146	0.002				0.0004064	0.16	0.002	0.0002032	0.166	-0.224				0.0008128	0.162	-0.001				0.0002032	0.148	-0.002
0.0004068	0.146	0.006				0.0004068	0.16	-0.002	0.0002034	0.168	-0.22				0.0008136	0.164	-0.001				0.0002034	0.144	-0.002
0.0004072	0.148	0.004				0.0004072	0.156	0.006	0.0002036	0.166	-0.22				0.0008144	0.164	-0.001				0.0002036	0.144	5.96047e-09
0.0004076	0.142	0.006				0.0004076	0.156	0.002	0.0002038	0.166	-0.24				0.0008152	0.164	-0.003				0.0002038	0.146	5.96047e-09
0.000408	0.142	0.004				0.000408	0.16	-0.002	0.000204	0.166	-0.236				0.000816	0.164	-0.003				0.000204	0.148	5.96047e-09
0.0004084	0.148	0.004				0.0004084	0.16	0.002	0.0002042	0.166	-0.236				0.0008168	0.164	-0.003				0.0002042	0.146	-0.002
0.0004088	0.148	0.006				0.0004088	0.156	0.002	0.0002044	0.166	-0.224				0.0008176	0.164	-0.003				0.0002044	0.148	5.96047e-09
0.0004092	0.146	0.006				0.0004092	0.156	0.002	0.0002046	0.166	-0.256				0.0008184	0.164	-0.001				0.0002046	0.148	5.96047e-09
0.0004096	0.144	0.004				0.0004096	0.16	0.006	0.0002048	0.168	-0.268				0.0008192	0.166	-0.001				0.0002048	0.146	5.96047e-09
0.00041	0.146	0.004				0.00041	0.156	-0.002	0.000205	0.168	-0.264				0.00082	0.164	-0.001				0.000205	0.144	5.96047e-09
0.0004104	0.148	0.004				0.0004104	0.16	0.002	0.0002052	0.166	-0.268				0.0008208	0.162	-0.003				0.0002052	0.144	5.96047e-09
0.0004108	0.144	0.004				0.0004108	0.16	-0.002	0.0002054	0.166	-0.276				0.0008216	0.16	-0.001				0.0002054	0.144	5.96047e-09
0.0004112	0.148	0.006				0.0004112	0.156	-0.006	0.0002056	0.17	-0.272				0.0008224	0.162	-0.003				0.0002056	0.146	5.96047e-09
0.0004116	0.146	0.002				0.0004116	0.156	0.006	0.0002058	0.168	-0.268				0.0008232	0.162	-0.001				0.0002058	0.146	-0.002
0.000412	0.146	0.004				0.000412	0.156	-0.002	0.000206	0.17	-0.268				0.000824	0.166	-0.003				0.000206	0.146	5.96047e-09
0.0004124	0.148	0.004				0.0004124	0.164	-0.006	0.0002062	0.17	-0.272				0.0008248	0.164	-0.001				0.0002062	0.146	-0.002
0.0004128	0.146	0.004				0.0004128	0.16	-0.006	0.0002064	0.168	-0.268				0.0008256	0.162	-0.001				0.0002064	0.144	5.96047e-09
0.0004132	0.146	0.004				0.0004132	0.156	-0.006	0.0002066	0.17	-0.268				0.0008264	0.164	-0.001				0.0002066	0.146	5.96047e-09
0.0004136	0.144	0.004				0.0004136	0.16	-0.006	0.0002068	0.172	-0.276				0.0008272	0.164	-0.001				0.0002068	0.146	5.96047e-09
0.000414	0.148	0.004				0.000414	0.156	-0.006	0.000207	0.17	-0.284				0.000828	0.164	-0.001				0.000207	0.146	5.96047e-09
0.0004144	0.146	0.004				0.0004144	0.16	-0.002	0.0002072	0.17	-0.292				0.0008288	0.168	-0.003				0.0002072	0.144	5.96047e-09
0.0004148	0.144	0.004				0.0004148	0.156	0.002	0.0002074	0.172	-0.3				0.0008296	0.166	-0.001				0.0002074	0.144	5.96047e-09
0.0004152	0.146	0.006				0.0004152	0.16	-0.002	0.0002076	0.172	-0.308				0.0008304	0.164	-0.003				0.0002076	0.142	0.002
0.0004156	0.148	0.004				0.0004156	0.16	-0.006	0.0002078	0.174	-0.296				0.0008312	0.166	-0.001				0.0002078	0.142	5.96047e-09
0.000416	0.148	0.006				0.000416	0.156	-0.002	0.000208	0.176	-0.296				0.000832	0.164	-0.001				0.000208	0.142	5.96047e-09
0.0004164	0.144	0.006				0.0004164	0.156	-0.002	0.0002082	0.176	-0.292				0.0008328	0.164	-0.001				0.0002082	0.144	5.96047e-09
0.0004168	0.146	0.002				0.0004168	0.156	-0.006	0.0002084	0.176	-0.284				0.0008336	0.166	-0.001				0.0002084	0.148	5.96047e-09
0.0004172	0.146	0.004				0.0004172	0.156	-0.002	0.0002086	0.176	-0.304				0.0008344	0.166	-0.001				0.0002086	0.148	5.96047e-09
0.0004176	0.146	0.002				0.0004176	0.16	-0.002	0.0002088	0.174	-0.296				0.0008352	0.162	-0.001				0.0002088	0.148	0.002
0.000418	0.146	0.002				0.000418	0.156	-0.002	0.000209	0.176	-0.3				0.000836	0.164	0.000999995				0.000209	0.142	0.002
0.0004184	0.148	0.004				0.0004184	0.156	-0.002	0.0002092	0.176	-0.304				0.0008368	0.168	-0.003				0.0002092	0.142	5.96047e-09
0.0004188	0.148	0.006				0.0004188	0.16	-0.002	0.0002094	0.178	-0.292				0.0008376	0.164	-0.001				0.0002094	0.144	5.96047e-09
0.0004192	0.148	0.002				0.0004192	0.16	-0.002	0.0002096	0.178	-0.296				0.0008384	0.166	-0.001				0.0002096	0.144	-0.002
0.0004196	0.146	0.004				0.0004196	0.16	-0.002	0.0002098	0.18	-0.296				0.0008392	0.162	-0.003				0.0002098	0.144	0.002
0.00042	0.146	0.004				0.00042	0.16	0.002	0.00021	0.178	-0.296				0.00084	0.164	-0.003				0.00021	0.146	5.96047e-09
0.0004204	0.15	0.004				0.0004204	0.16	-0.006	0.0002102	0.178	-0.32				0.0008408	0.164	-0.001				0.0002102	0.146	5.96047e-09
0.0004208	0.148	0.002				0.0004208	0.16	-0.002	0.0002104	0.18	-0.32				0.0008416	0.162	-0.003				0.0002104	0.14	5.96047e-09
0.0004212	0.146	0.004				0.0004212	0.156	-0.002	0.0002106	0.18	-0.316				0.0008424	0.162	-0.001				0.0002106	0.144	0.002
0.0004216	0.146	0.002				0.0004216	0.16	-0.002	0.0002108	0.18	-0.308				0.0008432	0.164	-0.001				0.0002108	0.144	5.96047e-09
0.000422	0.148	0.004				0.000422	0.156	-0.002	0.000211	0.18	-0.316				0.000844	0.164	-0.001				0.000211	0.146	0.002
0.0004224	0.148	0.004				0.0004224	0.156	-0.002	0.0002112	0.18	-0.324				0.0008448	0.164	-0.003				0.0002112	0.146	0.004
0.0004228	0.15	0.004				0.0004228	0.156	-0.006	0.0002114	0.18	-0.348				0.0008456	0.166	-0.003				0.0002114	0.146	5.96047e-09
0.0004232	0.15	0.004				0.0004232	0.156	-0.002	0.0002116	0.182	-0.356				0.0008464	0.164	-0.001				0.0002116	0.148	5.96047e-09
0.0004236	0.146	0.004				0.0004236	0.164	-0.006	0.0002118	0.184	-0.356				0.0008472	0.166	-0.007				0.0002118	0.144	0.002
0.000424	0.148	0.004				0.000424	0.164	-0.002	0.000212	0.18	-0.352				0.000848	0.164	-0.005				0.000212	0.144	5.96047e-09
0.0004244	0.154	0.004				0.0004244	0.156	-0.002	0.0002122	0.184	-0.36				0.0008488	0.166	-0.005				0.0002122	0.144	0.002
0.0004248	0.148	0.004				0.0004248	0.156	-0.002	0.0002124	0.182	-0.384				0.0008496	0.164	-0.003				0.0002124	0.144	5.96047e-09
0.0004252	0.144	0.004				0.0004252	0.16	-0.002	0.0002126	0.182	-0.368				0.0008504	0.166	-0.005				0.0002126	0.144	0.002
0.0004256	0.148	0.004				0.0004256	0.156	-0.01	0.0002128	0.18	-0.364				0.0008512	0.164	-0.003				0.0002128	0.142	0.002
0.000426	0.148	0.004				0.000426	0.16	-0.006	0.000213	0.182	-0.356				0.000852	0.164	-0.003				0.000213	0.144	-0.002
0.0004264	0.146	0.004				0.0004264	0.16	-0.006	0.0002132	0.184	-0.352				0.0008528	0.166	-0.003				0.0002132	0.142	5.96047e-09
0.0004268	0.148	0.002				0.0004268	0.156	-0.006	0.0002134	0.186	-0.352				0.0008536	0.166	-0.005				0.0002134	0.146	5.96047e-09
0.0004272	0.148	0.006				0.0004272	0.164	-0.006	0.0002136	0.186	-0.356				0.0008544	0.166	-0.003				0.0002136	0.144	5.96047e-09
0.0004276	0.148	0.004				0.0004276	0.156	-0.006	0.0002138	0.184	-0.356				0.0008552	0.166	-0.003				0.0002138	0.144	0.002
0.000428	0.148	0.002				0.000428	0.156	-0.01	0.000214	0.186	-0.356				0.000856	0.164	-0.003				0.000214	0.142	0.002
0.0004284	0.146	0.006				0.0004284	0.156	-0.01	0.0002142	0.188	-0.356				0.0008568	0.168	-0.003				0.0002142	0.14	5.96047e-09
0.0004288	0.148	0.004				0.0004288	0.156	-0.01	0.0002144	0.186	-0.352				0.0008576	0.166	-0.001				0.0002144	0.14	0.002
0.0004292	0.146	0.004				0.0004292	0.16	-0.006	0.0002146	0.186	-0.344				0.0008584	0.166	-0.003				0.0002146	0.142	5.96047e-09
0.0004296	0.148	0.004				0.0004296	0.156	-0.018	0.0002148	0.188	-0.356				0.0008592	0.166	-0.001				0.0002148	0.144	0.002
0.00043	0.144	0.004				0.00043	0.156	-0.01	0.000215	0.188	-0.352				0.00086	0.166	-0.005				0.000215	0.142	0.002
0.0004304	0.144	0.004				0.0004304	0.156	-0.018	0.0002152	0.188	-0.356				0.0008608	0.164	-0.003				0.0002152	0.142	0.002
0.0004308	0.148	0.006				0.0004308	0.16	-0.014	0.0002154	0.19	-0.368				0.0008616	0.164	-0.003				0.0002154	0.144	0.004
0.0004312	0.148	0.004				0.0004312	0.16	-0.014	0.0002156	0.19	-0.388				0.0008624	0.166	-0.001				0.0002156	0.142	0.002
0.0004316	0.148	0.004				0.0004316	0.16	-0.014	0.0002158	0.19	-0.376				0.0008632	0.166	-0.003				0.0002158	0.144	0.002
0.000432	0.146	0.004				0.000432	0.16	-0.022	0.000216	0.19	-0.372				0.000864	0.166	-0.003				0.000216	0.142	0.004
0.0004324	0.146	0.006				0.0004324	0.164	-0.026	0.0002162	0.19	-0.38				0.0008648	0.164	-0.001				0.0002162	0.144	0.002
0.0004328	0.146	0.006				0.0004328	0.164	-0.026	0.0002164	0.192	-0.392				0.0008656	0.168	-0.001				0.0002164	0.14	0.004
0.0004332	0.148	0.004				0.0004332	0.164	-0.022	0.0002166	0.192	-0.404				0.0008664	0.166	-0.001				0.0002166	0.14	0.002
0.0004336	0.148	0.004				0.0004336	0.156	-0.018	0.0002168	0.19	-0.4				0.0008672	0.164	-0.003				0.0002168	0.14	0.004
0.000434	0.144	0.004				0.000434	0.156	-0.022	0.000217	0.192	-0.416				0.000868	0.168	-0.001				0.000217	0.14	0.002
0.0004344	0.148	0.002				0.0004344	0.16	-0.026	0.0002172	0.192	-0.428				0.0008688	0.168	-0.001				0.0002172	0.142	0.002
0.0004348	0.152	0.002				0.0004348	0.16	-0.022	0.0002174	0.19	-0.416				0.0008696	0.168	-0.001				0.0002174	0.144	5.96047e-09
0.0004352	0.146	0.006				0.0004352	0.16	-0.03	0.0002176	0.192	-0.408				0.0008704	0.166	-0.001				0.0002176	0.142	5.96047e-09
0.0004356	0.146	0.004				0.0004356	0.168	-0.026	0.0002178	0.192	-0.432				0.0008712	0.166	-0.001				0.0002178	0.14	5.96047e-09
0.000436	0.148	0.002				0.000436	0.164	-0.026	0.000218	0.194	-0.428				0.000872	0.168	0.000999995				0.000218	0.142	5.96047e-09
0.0004364	0.148	0.006				0.0004364	0.164	-0.03	0.0002182	0.192	-0.432				0.0008728	0.166	-0.001				0.0002182	0.14	5.96047e-09
0.0004368	0.146	5.96047e-09				0.0004368	0.164	-0.022	0.0002184	0.192	-0.424				0.0008736	0.168	-0.001				0.0002184	0.138	5.96047e-09
0.0004372	0.148	0.004				0.0004372	0.164	-0.026	0.0002186	0.196	-0.416				0.0008744	0.168	-0.005				0.0002186	0.144	5.96047e-09
0.0004376	0.148	0.004				0.0004376	0.164	-0.026	0.0002188	0.194	-0.412				0.0008752	0.164	-0.001				0.0002188	0.144	-0.002
0.000438	0.148	0.002				0.000438	0.168	-0.026	0.000219	0.192	-0.4				0.000876	0.168	-0.003				0.000219	0.148	5.96047e-09
0.0004384	0.15	0.004				0.0004384	0.164	-0.03	0.0002192	0.196	-0.392				0.0008768	0.168	0.000999995				0.0002192	0.142	5.96047e-09
0.0004388	0.148	0.004				0.0004388	0.168	-0.03	0.0002194	0.194	-0.428				0.0008776	0.164	-0.001				0.0002194	0.14	5.96047e-09
0.0004392	0.148	0.004				0.0004392	0.168	-0.03	0.0002196	0.194	-0.42				0.0008784	0.166	-0.001				0.0002196	0.14	5.96047e-09
0.0004396	0.148	5.96047e-09				0.0004396	0.168	-0.026	0.0002198	0.196	-0.424				0.0008792	0.164	-0.009				0.0002198	0.14	5.96047e-09
0.00044	0.148	0.004				0.00044	0.164	-0.022	0.00022	0.194	-0.416				0.00088	0.166	-0.007				0.00022	0.142	0.002
0.0004404	0.144	0.004				0.0004404	0.168	-0.03	0.0002202	0.194	-0.404				0.0008808	0.166	-0.007				0.0002202	0.14	0.002
0.0004408	0.146	0.006				0.0004408	0.168	-0.03	0.0002204	0.194	-0.396				0.0008816	0.166	-0.005				0.0002204	0.142	5.96047e-09
0.0004412	0.152	0.002				0.0004412	0.16	-0.026	0.0002206	0.192	-0.412				0.0008824	0.166	-0.005				0.0002206	0.142	0.002
0.0004416	0.146	0.006				0.0004416	0.164	-0.038	0.0002208	0.194	-0.396				0.0008832	0.166	-0.005				0.0002208	0.144	5.96047e-09
0.000442	0.15	0.004				0.000442	0.172	-0.034	0.000221	0.194	-0.4				0.000884	0.164	-0.005				0.000221	0.144	5.96047e-09
0.0004424	0.15	0.004				0.0004424	0.168	-0.034	0.0002212	0.194	-0.388				0.0008848	0.166	-0.007				0.0002212	0.144	5.96047e-09
0.0004428	0.146	0.006				0.0004428	0.164	-0.026	0.0002214	0.194	-0.38				0.0008856	0.166	-0.001				0.0002214	0.14	0.002
0.0004432	0.146	0.002				0.0004432	0.168	-0.034	0.0002216	0.192	-0.384				0.0008864	0.164	-0.007				0.0002216	0.142	5.96047e-09
0.0004436	0.148	0.004				0.0004436	0.172	-0.038	0.0002218	0.196	-0.4				0.0008872	0.164	-0.005				0.0002218	0.138	0.002
0.000444	0.146	0.004				0.000444	0.164	-0.026	0.000222	0.196	-0.4				0.000888	0.166	-0.005				0.000222	0.138	5.96047e-09
0.0004444	0.144	0.004				0.0004444	0.168	-0.03	0.0002222	0.194	-0.4				0.0008888	0.166	-0.005				0.0002222	0.142	5.96047e-09
0.0004448	0.15	0.004				0.0004448	0.168	-0.026	0.0002224	0.194	-0.392				0.0008896	0.166	-0.009				0.0002224	0.146	5.96047e-09
0.0004452	0.148	0.006				0.0004452	0.164	-0.038	0.0002226	0.198	-0.388				0.0008904	0.166	-0.007				0.0002226	0.146	0.002
0.0004456	0.146	0.002				0.0004456	0.164	-0.034	0.0002228	0.2	-0.436				0.0008912	0.164	-0.007				0.0002228	0.144	5.96047e-09
0.000446	0.15	0.004				0.000446	0.172	-0.034	0.000223	0.194	-0.42				0.000892	0.162	-0.009				0.000223	0.14	0.002
0.0004464	0.146	0.004				0.0004464	0.168	-0.026	0.0002232	0.198	-0.428				0.0008928	0.166	-0.009				0.0002232	0.14	5.96047e-09
0.0004468	0.144	0.004				0.0004468	0.168	-0.038	0.0002234	0.198	-0.416				0.0008936	0.166	-0.015				0.0002234	0.142	5.96047e-09
0.0004472	0.148	0.004				0.0004472	0.164	-0.038	0.0002236	0.198	-0.416				0.0008944	0.166	-0.023				0.0002236	0.142	0.002
0.0004476	0.15	0.002				0.0004476	0.16	-0.042	0.0002238	0.198	-0.424				0.0008952	0.166	-0.021				0.0002238	0.144	0.002
0.000448	0.15	0.004				0.000448	0.168	-0.046	0.000224	0.2	-0.424				0.000896	0.164	-0.019				0.000224	0.146	0.002
0.0004484	0.146	0.004				0.0004484	0.164	-0.05	0.0002242	0.2	-0.416				0.0008968	0.166	-0.019				0.0002242	0.144	0.002
0.0004488	0.146	0.002				0.0004488	0.164	-0.054	0.0002244	0.2	-0.416				0.0008976	0.168	-0.017				0.0002244	0.144	5.96047e-09
0.0004492	0.148	0.004				0.0004492	0.172	-0.05	0.0002246	0.2	-0.408				0.0008984	0.164	-0.019				0.0002246	0.144	5.96047e-09
0.0004496	0.15	0.004				0.0004496	0.164	-0.046	0.0002248	0.202	-0.4				0.0008992	0.164	-0.019				0.0002248	0.144	5.96047e-09
0.00045	0.148	0.004				0.00045	0.172	-0.05	0.000225	0.2	-0.392				0.0009	0.166	-0.019				0.000225	0.146	5.96047e-09
0.0004504	0.148	0.004				0.0004504	0.164	-0.054	0.0002252	0.196	-0.392				0.0009008	0.162	-0.017				0.0002252	0.144	0.002
0.0004508	0.146	0.004				0.0004508	0.164	-0.066	0.0002254	0.2	-0.384				0.0009016	0.166	-0.017				0.0002254	0.142	0.002
0.0004512	0.148	0.002				0.0004512	0.16	-0.058	0.0002256	0.2	-0.384				0.0009024	0.166	-0.019				0.0002256	0.144	0.002
0.0004516	0.15	0.002				0.0004516	0.168	-0.062	0.0002258	0.198	-0.376				0.0009032	0.166	-0.013				0.0002258	0.144	0.002
0.000452	0.148	0.002				0.000452	0.168	-0.066	0.000226	0.204	-0.376				0.000904	0.166	-0.011				0.000226	0.146	0.002
0.0004524	0.146	0.004				0.0004524	0.168	-0.066	0.0002262	0.204	-0.372				0.0009048	0.166	-0.011				0.0002262	0.144	5.96047e-09
0.0004528	0.144	0.004				0.0004528	0.176	-0.066	0.0002264	0.202	-0.364				0.0009056	0.168	-0.011				0.0002264	0.146	0.004
0.0004532	0.146	0.004				0.0004532	0.172	-0.066	0.0002266	0.204	-0.36				0.0009064	0.168	-0.011				0.0002266	0.144	0.002
0.0004536	0.148	0.004				0.0004536	0.172	-0.066	0.0002268	0.202	-0.364				0.0009072	0.166	-0.011				0.0002268	0.146	0.002
0.000454	0.146	0.006				0.000454	0.164	-0.066	0.000227	0.204	-0.356				0.000908	0.168	-0.011				0.000227	0.144	0.004
0.0004544	0.142	0.006				0.0004544	0.172	-0.074	0.0002272	0.204	-0.352				0.0009088	0.168	-0.011				0.0002272	0.146	0.002
0.0004548	0.144	0.006				0.0004548	0.164	-0.066	0.0002274	0.202	-0.348				0.0009096	0.168	-0.015				0.0002274	0.144	0.002
0.0004552	0.148	0.002				0.0004552	0.176	-0.074	0.0002276	0.202	-0.352				0.0009104	0.166	-0.013				0.0002276	0.146	0.004
0.0004556	0.144	0.006				0.0004556	0.172	-0.078	0.0002278	0.204	-0.356				0.0009112	0.168	-0.011				0.0002278	0.144	5.96047e-09
0.000456	0.144	0.004				0.000456	0.176	-0.086	0.000228	0.202	-0.348				0.000912	0.17	-0.011				0.000228	0.144	0.002
0.0004564	0.148	0.004				0.0004564	0.168	-0.09	0.0002282	0.202	-0.344				0.0009128	0.17	-0.013				0.0002282	0.144	5.96047e-09
0.0004568	0.144	0.008				0.0004568	0.176	-0.094	0.0002284	0.204	-0.336				0.0009136	0.17	-0.011				0.0002284	0.142	0.002
0.0004572	0.146	0.002				0.0004572	0.168	-0.09	0.0002286	0.204	-0.34				0.0009144	0.168	-0.011				0.0002286	0.144	0.002
0.0004576	0.148	0.004				0.0004576	0.176	-0.086	0.0002288	0.206	-0.332				0.0009152	0.17	-0.013				0.0002288	0.146	0.002
0.000458	0.148	0.004				0.000458	0.172	-0.086	0.000229	0.204	-0.328				0.000916	0.168	-0.015				0.000229	0.144	0.002
0.0004584	0.144	0.004				0.0004584	0.168	-0.098	0.0002292	0.206	-0.324				0.0009168	0.168	-0.017				0.0002292	0.144	0.002
0.0004588	0.148	0.004				0.0004588	0.176	-0.102	0.0002294	0.204	-0.316				0.0009176	0.168	-0.015				0.0002294	0.142	0.004
0.0004592	0.146	0.006				0.0004592	0.18	-0.11	0.0002296	0.204	-0.32				0.0009184	0.168	-0.017				0.0002296	0.144	0.004
0.0004596	0.144	0.004				0.0004596	0.172	-0.106	0.0002298	0.202	-0.34				0.0009192	0.168	-0.015				0.0002298	0.144	0.004
0.00046	0.146	0.002				0.00046	0.168	-0.102	0.00023	0.204	-0.352				0.00092	0.168	-0.015				0.00023	0.148	0.002
0.0004604	0.146	0.002				0.0004604	0.172	-0.106	0.0002302	0.202	-0.348				0.0009208	0.168	-0.013				0.0002302	0.144	0.002
0.0004608	0.142	0.004				0.0004608	0.168	-0.106	0.0002304	0.204	-0.344				0.0009216	0.168	-0.013				0.0002304	0.146	0.002
0.0004612	0.144	0.004				0.0004612	0.176	-0.11	0.0002306	0.202	-0.336				0.0009224	0.17	-0.011				0.0002306	0.142	0.002
0.0004616	0.146	0.004				0.0004616	0.176	-0.098	0.0002308	0.2	-0.352				0.0009232	0.168	-0.013				0.0002308	0.144	0.002
0.000462	0.146	0.002				0.000462	0.176	-0.098	0.000231	0.204	-0.34				0.000924	0.168	-0.013				0.000231	0.146	0.002
0.0004624	0.146	0.002				0.0004624	0.172	-0.098	0.0002312	0.202	-0.34				0.0009248	0.166	-0.011				0.0002312	0.144	0.002
0.0004628	0.148	0.004				0.0004628	0.176	-0.094	0.0002314	0.2	-0.332				0.0009256	0.166	-0.009				0.0002314	0.148	0.002
0.0004632	0.144	0.006				0.0004632	0.176	-0.09	0.0002316	0.198	-0.328				0.0009264	0.168	-0.009				0.0002316	0.148	5.96047e-09
0.0004636	0.144	0.004				0.0004636	0.176	-0.106	0.0002318	0.2	-0.324				0.0009272	0.168	-0.013				0.0002318	0.146	0.002
0.000464	0.146	0.006				0.000464	0.172	-0.11	0.000232	0.198	-0.32				0.000928	0.17	-0.015				0.000232	0.144	0.004
0.0004644	0.146	0.004				0.0004644	0.176	-0.11	0.0002322	0.2	-0.32				0.0009288	0.168	-0.013				0.0002322	0.146	0.002
0.0004648	0.144	0.004				0.0004648	0.176	-0.114	0.0002324	0.198	-0.312				0.0009296	0.168	-0.015				0.0002324	0.144	0.002
0.0004652	0.146	5.96047e-09				0.0004652	0.172	-0.106	0.0002326	0.2	-0.3				0.0009304	0.166	-0.013				0.0002326	0.142	0.004
0.0004656	0.148	0.004				0.0004656	0.172	-0.106	0.0002328	0.198	-0.304				0.0009312	0.168	-0.011				0.0002328	0.142	0.002
0.000466	0.144	0.004				0.000466	0.176	-0.102	0.000233	0.198	-0.296				0.000932	0.17	-0.009				0.000233	0.14	0.002
0.0004664	0.146	0.006				0.0004664	0.18	-0.102	0.0002332	0.198	-0.296				0.0009328	0.168	-0.015				0.0002332	0.144	5.96047e-09
0.0004668	0.146	0.004				0.0004668	0.176	-0.102	0.0002334	0.2	-0.292				0.0009336	0.168	-0.021				0.0002334	0.146	5.96047e-09
0.0004672	0.146	0.006				0.0004672	0.172	-0.098	0.0002336	0.2	-0.288				0.0009344	0.168	-0.017				0.0002336	0.146	0.004
0.0004676	0.146	0.002				0.0004676	0.18	-0.102	0.0002338	0.198	-0.28				0.0009352	0.168	-0.017				0.0002338	0.146	0.004
0.000468	0.146	0.004				0.000468	0.176	-0.11	0.000234	0.2	-0.276				0.000936	0.17	-0.017				0.000234	0.148	0.004
0.0004684	0.146	0.002				0.0004684	0.18	-0.094	0.0002342	0.2	-0.272				0.0009368	0.17	-0.015				0.0002342	0.146	0.004
0.0004688	0.146	0.006				0.0004688	0.176	-0.106	0.0002344	0.196	-0.284				0.0009376	0.17	-0.015				0.0002344	0.142	0.004
0.0004692	0.142	0.004				0.0004692	0.184	-0.098	0.0002346	0.2	-0.284				0.0009384	0.168	-0.011				0.0002346	0.14	0.004
0.0004696	0.144	0.004				0.0004696	0.176	-0.098	0.0002348	0.2	-0.28				0.0009392	0.168	-0.011				0.0002348	0.142	0.004
0.00047	0.144	0.002				0.00047	0.184	-0.098	0.000235	0.198	-0.288				0.00094	0.166	-0.019				0.000235	0.142	0.002
0.0004704	0.146	0.006				0.0004704	0.18	-0.114	0.0002352	0.198	-0.304				0.0009408	0.166	-0.017				0.0002352	0.144	5.96047e-09
0.0004708	0.15	0.004				0.0004708	0.184	-0.102	0.0002354	0.196	-0.3				0.0009416	0.168	-0.019				0.0002354	0.146	-0.002
0.0004712	0.144	0.004				0.0004712	0.192	-0.098	0.0002356	0.198	-0.296				0.0009424	0.168	-0.017				0.0002356	0.146	0.002
0.0004716	0.146	0.004				0.0004716	0.188	-0.098	0.0002358	0.194	-0.292				0.0009432	0.166	-0.019				0.0002358	0.148	0.002
0.000472	0.148	0.004				0.000472	0.188	-0.094	0.000236	0.198	-0.316				0.000944	0.168	-0.019				0.000236	0.144	0.004
0.0004724	0.146	0.004				0.0004724	0.188	-0.09	0.0002362	0.198	-0.3				0.0009448	0.168	-0.017				0.0002362	0.144	0.002
0.0004728	0.142	0.004				0.0004728	0.184	-0.09	0.0002364	0.196	-0.296				0.0009456	0.166	-0.017				0.0002364	0.144	0.002
0.0004732	0.144	0.004				0.0004732	0.192	-0.09	0.0002366	0.198	-0.288				0.0009464	0.168	-0.017				0.0002366	0.144	0.002
0.0004736	0.146	0.004				0.0004736	0.192	-0.082	0.0002368	0.198	-0.284				0.0009472	0.166	-0.017				0.0002368	0.144	0.006
0.000474	0.146	0.004				0.000474	0.188	-0.09	0.000237	0.2	-0.288				0.000948	0.168	-0.017				0.000237	0.144	0.004
0.0004744	0.146	0.006				0.0004744	0.188	-0.094	0.0002372	0.196	-0.304				0.0009488	0.168	-0.021				0.0002372	0.144	0.002
0.0004748	0.148	0.004				0.0004748	0.192	-0.082	0.0002374	0.198	-0.292				0.0009496	0.17	-0.019				0.0002374	0.146	0.002
0.0004752	0.15	0.006				0.0004752	0.18	-0.09	0.0002376	0.2	-0.288				0.0009504	0.168	-0.023				0.0002376	0.146	0.004
0.0004756	0.146	0.004				0.0004756	0.2	-0.078	0.0002378	0.198	-0.28				0.0009512	0.17	-0.019				0.0002378	0.148	0.002
0.000476	0.148	0.004				0.000476	0.188	-0.082	0.000238	0.2	-0.276				0.000952	0.168	-0.019				0.000238	0.144	0.004
0.0004764	0.142	0.004				0.0004764	0.196	-0.086	0.0002382	0.2	-0.276				0.0009528	0.168	-0.019				0.0002382	0.144	0.004
0.0004768	0.146	0.002				0.0004768	0.192	-0.09	0.0002384	0.2	-0.272				0.0009536	0.168	-0.019				0.0002384	0.144	0.004
0.0004772	0.152	0.004				0.0004772	0.192	-0.09	0.0002386	0.198	-0.276				0.0009544	0.17	-0.015				0.0002386	0.142	0.004
0.0004776	0.148	0.004				0.0004776	0.196	-0.09	0.0002388	0.2	-0.28				0.0009552	0.17	-0.013				0.0002388	0.144	0.002
0.000478	0.148	0.006				0.000478	0.196	-0.082	0.000239	0.2	-0.276				0.000956	0.17	-0.013				0.000239	0.148	0.002
0.0004784	0.146	0.004				0.0004784	0.196	-0.09	0.0002392	0.2	-0.28				0.0009568	0.17	-0.013				0.0002392	0.146	0.002
0.0004788	0.146	0.004				0.0004788	0.2	-0.09	0.0002394	0.198	-0.276				0.0009576	0.17	-0.013				0.0002394	0.144	0.002
0.0004792	0.146	0.004				0.0004792	0.2	-0.086	0.0002396	0.2	-0.276				0.0009584	0.172	-0.017				0.0002396	0.144	0.004
0.0004796	0.152	0.004				0.0004796	0.196	-0.082	0.0002398	0.2	-0.272				0.0009592	0.17	-0.011				0.0002398	0.142	0.002
0.00048	0.148	0.004				0.00048	0.2	-0.082	0.00024	0.2	-0.26				0.00096	0.168	-0.019				0.00024	0.142	0.002
0.0004804	0.142	0.004				0.0004804	0.2	-0.078	0.0002402	0.2	-0.268				0.0009608	0.17	-0.025				0.0002402	0.142	0.002
0.0004808	0.146	0.002				0.0004808	0.204	-0.086	0.0002404	0.202	-0.252				0.0009616	0.17	-0.023				0.0002404	0.142	0.002
0.0004812	0.148	0.002				0.0004812	0.204	-0.082	0.0002406	0.202	-0.26				0.0009624	0.17	-0.025				0.0002406	0.144	0.002
0.0004816	0.142	0.004				0.0004816	0.2	-0.086	0.0002408	0.202	-0.288				0.0009632	0.17	-0.023				0.0002408	0.146	0.004
0.000482	0.144	0.006				0.000482	0.204	-0.082	0.000241	0.202	-0.268				0.000964	0.168	-0.021				0.000241	0.146	0.004
0.0004824	0.146	0.004				0.0004824	0.204	-0.082	0.0002412	0.202	-0.256				0.0009648	0.174	-0.025				0.0002412	0.142	0.004
0.0004828	0.144	0.006				0.0004828	0.204	-0.082	0.0002414	0.206	-0.272				0.0009656	0.172	-0.033				0.0002414	0.144	0.004
0.0004832	0.144	0.006				0.0004832	0.208	-0.082	0.0002416	0.202	-0.264				0.0009664	0.17	-0.039				0.0002416	0.142	0.004
0.0004836	0.146	0.006				0.0004836	0.208	-0.082	0.0002418	0.206	-0.264				0.0009672	0.172	-0.039				0.0002418	0.142	0.004
0.000484	0.146	0.004				0.000484	0.204	-0.074	0.000242	0.204	-0.256				0.000968	0.174	-0.035				0.000242	0.142	0.002
0.0004844	0.146	0.004				0.0004844	0.212	-0.078	0.0002422	0.202	-0.252				0.0009688	0.172	-0.035				0.0002422	0.142	0.002
0.0004848	0.146	0.006				0.0004848	0.204	-0.07	0.0002424	0.206	-0.256				0.0009696	0.17	-0.033				0.0002424	0.14	0.004
0.0004852	0.144	0.004				0.0004852	0.208	-0.078	0.0002426	0.21	-0.248				0.0009704	0.172	-0.033				0.0002426	0.142	0.004
0.0004856	0.146	0.004				0.0004856	0.204	-0.066	0.0002428	0.21	-0.256				0.0009712	0.17	-0.031				0.0002428	0.142	0.002
0.000486	0.146	0.004				0.000486	0.208	-0.074	0.000243	0.204	-0.24				0.000972	0.168	-0.029				0.000243	0.142	0.004
0.0004864	0.144	0.006				0.0004864	0.208	-0.07	0.0002432	0.208	-0.232				0.0009728	0.17	-0.031				0.0002432	0.142	0.002
0.0004868	0.146	0.004				0.0004868	0.212	-0.066	0.0002434	0.208	-0.236				0.0009736	0.17	-0.027				0.0002434	0.142	0.002
0.0004872	0.146	0.004				0.0004872	0.208	-0.066	0.0002436	0.208	-0.228				0.0009744	0.17	-0.025				0.0002436	0.142	0.002
0.0004876	0.148	0.004				0.0004876	0.208	-0.066	0.0002438	0.208	-0.224				0.0009752	0.17	-0.023				0.0002438	0.142	0.004
0.000488	0.144	0.004				0.000488	0.216	-0.058	0.000244	0.21	-0.232				0.000976	0.17	-0.025				0.000244	0.14	0.002
0.0004884	0.144	5.96047e-09				0.0004884	0.216	-0.066	0.0002442	0.208	-0.228				0.0009768	0.172	-0.021				0.0002442	0.138	0.002
0.0004888	0.15	0.002				0.0004888	0.212	-0.058	0.0002444	0.208	-0.224				0.0009776	0.17	-0.021				0.0002444	0.142	0.004
0.0004892	0.146	0.006				0.0004892	0.216	-0.066	0.0002446	0.212	-0.22				0.0009784	0.168	-0.017				0.0002446	0.142	5.96047e-09
0.0004896	0.146	0.004				0.0004896	0.212	-0.066	0.0002448	0.21	-0.216				0.0009792	0.168	-0.017				0.0002448	0.144	0.002
0.00049	0.148	5.96047e-09				0.00049	0.212	-0.066	0.000245	0.208	-0.22				0.00098	0.17	-0.023				0.000245	0.144	0.004
0.0004904	0.146	0.006				0.0004904	0.212	-0.07	0.0002452	0.21	-0.208				0.0009808	0.168	-0.025				0.0002452	0.14	0.006
0.0004908	0.146	0.004				0.0004908	0.22	-0.07	0.0002454	0.21	-0.224				0.0009816	0.17	-0.025				0.0002454	0.142	0.004
0.0004912	0.148	0.006				0.0004912	0.212	-0.062	0.0002456	0.21	-0.232				0.0009824	0.168	-0.025				0.0002456	0.142	0.002
0.0004916	0.148	0.004				0.0004916	0.212	-0.062	0.0002458	0.21	-0.224				0.0009832	0.17	-0.021				0.0002458	0.142	0.004
0.000492	0.144	0.004				0.000492	0.22	-0.062	0.000246	0.212	-0.216				0.000984	0.172	-0.021				0.000246	0.144	0.004
0.0004924	0.146	0.002				0.0004924	0.216	-0.066	0.0002462	0.212	-0.22				0.0009848	0.168	-0.023				0.0002462	0.144	0.002
0.0004928	0.146	0.004				0.0004928	0.22	-0.066	0.0002464	0.212	-0.216				0.0009856	0.17	-0.021				0.0002464	0.14	0.002
0.0004932	0.144	0.004				0.0004932	0.216	-0.074	0.0002466	0.21	-0.212				0.0009864	0.17	-0.019				0.0002466	0.142	0.004
0.0004936	0.146	0.004				0.0004936	0.216	-0.066	0.0002468	0.21	-0.208				0.0009872	0.168	-0.019				0.0002468	0.144	5.96047e-09
0.000494	0.146	0.004				0.000494	0.22	-0.062	0.000247	0.212	-0.208				0.000988	0.172	-0.019				0.000247	0.144	0.004
0.0004944	0.146	0.004				0.0004944	0.216	-0.066	0.0002472	0.212	-0.208				0.0009888	0.17	-0.015				0.0002472	0.144	0.002
0.0004948	0.146	0.004				0.0004948	0.22	-0.062	0.0002474	0.214	-0.2				0.0009896	0.17	-0.017				0.0002474	0.144	0.002
0.0004952	0.142	0.004				0.0004952	0.216	-0.07	0.0002476	0.214	-0.2				0.0009904	0.17	-0.017				0.0002476	0.142	0.004
0.0004956	0.142	0.002				0.0004956	0.216	-0.074	0.0002478	0.212	-0.196				0.0009912	0.17	-0.017				0.0002478	0.144	0.004
0.000496	0.148	5.96047e-09				0.000496	0.22	-0.074	0.000248	0.212	-0.192				0.000992	0.17	-0.019				0.000248	0.144	0.002
0.0004964	0.146	0.008				0.0004964	0.224	-0.082	0.0002482	0.212	-0.192				0.0009928	0.17	-0.019				0.0002482	0.144	0.004
0.0004968	0.14	0.004				0.0004968	0.216	-0.082	0.0002484	0.214	-0.192				0.0009936	0.172	-0.017				0.0002484	0.144	0.004
0.0004972	0.142	0.002				0.0004972	0.22	-0.082	0.0002486	0.214	-0.192				0.0009944	0.168	-0.017				0.0002486	0.144	0.002
0.0004976	0.146	0.004				0.0004976	0.224	-0.078	0.0002488	0.21	-0.192				0.0009952	0.172	-0.017				0.0002488	0.142	0.004
0.000498	0.148	0.004				0.000498	0.22	-0.09	0.000249	0.21	-0.18				0.000996	0.172	-0.015				0.000249	0.142	0.004
0.0004984	0.146	0.002				0.0004984	0.216	-0.082	0.0002492	0.214	-0.18				0.0009968	0.17	-0.015				0.0002492	0.144	0.002
0.0004988	0.146	5.96047e-09				0.0004988	0.216	-0.09	0.0002494	0.212	-0.18				0.0009976	0.17	-0.015				0.0002494	0.144	0.004
0.0004992	0.144	0.004				0.0004992	0.216	-0.082	0.0002496	0.212	-0.18				0.0009984	0.168	-0.015				0.0002496	0.144	0.002
0.0004996	0.144	0.004				0.0004996	0.224	-0.078	0.0002498	0.212	-0.18				0.0009992	0.17	-0.017				0.0002498	0.144	0.004
0.0005	0.146	0.006				0.0005	0.216	-0.082	0.00025	0.212	-0.176				0.001	0.172	-0.021				0.00025	0.144	0.004
0.0005004	0.144	0.002				0.0005004	0.236	-0.094	0.0002502	0.212	-0.18				0.001	0.17	-0.021				0.0002502	0.142	0.004
0.0005008	0.146	0.004				0.0005008	0.228	-0.09	0.0002504	0.21	-0.168				0.001	0.17	-0.017				0.0002504	0.144	0.002
0.0005012	0.146	0.006				0.0005012	0.224	-0.102	0.0002506	0.212	-0.196				0.001	0.17	-0.017				0.0002506	0.142	0.004
0.0005016	0.146	0.002				0.0005016	0.224	-0.098	0.0002508	0.214	-0.188				0.001	0.172	-0.029				0.0002508	0.142	0.002
0.000502	0.144	0.006				0.000502	0.232	-0.11	0.000251	0.216	-0.18				0.001	0.172	-0.027				0.000251	0.142	0.004
0.0005024	0.146	0.002				0.0005024	0.224	-0.102	0.0002512	0.214	-0.172				0.001	0.174	-0.025				0.0002512	0.144	0.004
0.0005028	0.148	0.004				0.0005028	0.228	-0.11	0.0002514	0.216	-0.172				0.00101	0.172	-0.023				0.0002514	0.144	0.004
0.0005032	0.146	0.004				0.0005032	0.228	-0.102	0.0002516	0.214	-0.172				0.00101	0.172	-0.023				0.0002516	0.146	0.004
0.0005036	0.146	0.002				0.0005036	0.232	-0.106	0.0002518	0.214	-0.168				0.00101	0.174	-0.021				0.0002518	0.144	0.002
0.000504	0.148	0.004				0.000504	0.232	-0.106	0.000252	0.216	-0.168				0.00101	0.172	-0.019				0.000252	0.148	0.004
0.0005044	0.144	0.004				0.0005044	0.232	-0.106	0.0002522	0.218	-0.168				0.00101	0.174	-0.017				0.0002522	0.146	0.004
0.0005048	0.144	0.004				0.0005048	0.232	-0.094	0.0002524	0.218	-0.168				0.00101	0.172	-0.019				0.0002524	0.146	0.004
0.0005052	0.15	0.004				0.0005052	0.228	-0.098	0.0002526	0.218	-0.16				0.00101	0.174	-0.021				0.0002526	0.144	0.002
0.0005056	0.144	0.006				0.0005056	0.228	-0.094	0.0002528	0.218	-0.164				0.00101	0.174	-0.019				0.0002528	0.144	0.004
0.000506	0.146	0.004				0.000506	0.228	-0.09	0.000253	0.218	-0.152				0.00101	0.176	-0.017				0.000253	0.144	0.004
0.0005064	0.146	0.002				0.0005064	0.228	-0.094	0.0002532	0.218	-0.156				0.00101	0.176	-0.017				0.0002532	0.146	0.002
0.0005068	0.146	0.004				0.0005068	0.224	-0.09	0.0002534	0.22	-0.156				0.00101	0.176	-0.015				0.0002534	0.142	0.006
0.0005072	0.146	0.004				0.0005072	0.228	-0.098	0.0002536	0.218	-0.164				0.00101	0.178	-0.015				0.0002536	0.144	0.002
0.0005076	0.144	0.002				0.0005076	0.232	-0.102	0.0002538	0.218	-0.172				0.00102	0.174	-0.015				0.0002538	0.144	0.004
0.000508	0.146	0.004				0.000508	0.22	-0.094	0.000254	0.218	-0.16				0.00102	0.178	-0.023				0.000254	0.144	0.002
0.0005084	0.148	0.004				0.0005084	0.228	-0.102	0.0002542	0.218	-0.16				0.00102	0.176	-0.023				0.0002542	0.144	0.004
0.0005088	0.146	0.004				0.0005088	0.228	-0.086	0.0002544	0.218	-0.16				0.00102	0.178	-0.021				0.0002544	0.144	0.004
0.0005092	0.148	0.002				0.0005092	0.224	-0.102	0.0002546	0.22	-0.148				0.00102	0.172	-0.019				0.0002546	0.146	0.006
0.0005096	0.146	0.004				0.0005096	0.22	-0.098	0.0002548	0.222	-0.152				0.00102	0.174	-0.021				0.0002548	0.146	0.002
0.00051	0.148	5.96047e-09				0.00051	0.216	-0.094	0.000255	0.22	-0.152				0.00102	0.178	-0.025				0.000255	0.144	0.006
0.0005104	0.15	0.004				0.0005104	0.22	-0.086	0.0002552	0.218	-0.152				0.00102	0.174	-0.025				0.0002552	0.144	0.008
0.0005108	0.148	0.004				0.0005108	0.22	-0.086	0.0002554	0.222	-0.152				0.00102	0.176	-0.027				0.0002554	0.146	0.004
0.0005112	0.148	0.004				0.0005112	0.22	-0.086	0.0002556	0.22	-0.156				0.00102	0.178	-0.023				0.0002556	0.144	0.008
0.0005116	0.15	0.004				0.0005116	0.22	-0.09	0.0002558	0.22	-0.152				0.00102	0.174	-0.033				0.0002558	0.146	0.004
0.000512	0.146	0.006				0.000512	0.224	-0.094	0.000256	0.22	-0.144				0.00102	0.178	-0.037				0.000256	0.146	0.004
0.0005124	0.144	0.004				0.0005124	0.22	-0.09	0.0002562	0.22	-0.144				0.00102	0.176	-0.037				0.0002562	0.146	0.004
0.0005128	0.148	0.002				0.0005128	0.22	-0.086	0.0002564	0.22	-0.14				0.00103	0.176	-0.033				0.0002564	0.146	0.004
0.0005132	0.148	0.004				0.0005132	0.22	-0.086	0.0002566	0.22	-0.148				0.00103	0.174	-0.031				0.0002566	0.144	0.004
0.0005136	0.15	0.004				0.0005136	0.212	-0.082	0.0002568	0.22	-0.144				0.00103	0.176	-0.033				0.0002568	0.146	0.006
0.000514	0.154	0.004				0.000514	0.212	-0.082	0.000257	0.22	-0.14				0.00103	0.176	-0.029				0.000257	0.146	0.002
0.0005144	0.148	0.004				0.0005144	0.216	-0.086	0.0002572	0.222	-0.136				0.00103	0.178	-0.027				0.0002572	0.148	0.004
0.0005148	0.144	0.004				0.0005148	0.22	-0.078	0.0002574	0.22	-0.136				0.00103	0.178	-0.027				0.0002574	0.146	0.004
0.0005152	0.146	0.004				0.0005152	0.212	-0.078	0.0002576	0.22	-0.14				0.00103	0.18	-0.025				0.0002576	0.148	0.004
0.0005156	0.148	0.004				0.0005156	0.212	-0.074	0.0002578	0.22	-0.144				0.00103	0.178	-0.023				0.0002578	0.148	0.004
0.000516	0.152	0.004				0.000516	0.22	-0.078	0.000258	0.222	-0.136				0.00103	0.178	-0.031				0.000258	0.146	0.004
0.0005164	0.146	5.96047e-09				0.0005164	0.224	-0.078	0.0002582	0.22	-0.136				0.00103	0.178	-0.033				0.0002582	0.146	0.004
0.0005168	0.15	0.004				0.0005168	0.216	-0.078	0.0002584	0.22	-0.136				0.00103	0.178	-0.031				0.0002584	0.148	0.004
0.0005172	0.146	0.004				0.0005172	0.224	-0.074	0.0002586	0.222	-0.132				0.00103	0.178	-0.027				0.0002586	0.148	0.004
0.0005176	0.148	0.002				0.0005176	0.22	-0.07	0.0002588	0.22	-0.136				0.00104	0.18	-0.025				0.0002588	0.15	0.002
0.000518	0.15	0.004				0.000518	0.22	-0.074	0.000259	0.22	-0.132				0.00104	0.18	-0.025				0.000259	0.148	0.002
0.0005184	0.146	0.008				0.0005184	0.228	-0.066	0.0002592	0.224	-0.128				0.00104	0.178	-0.023				0.0002592	0.15	0.004
0.0005188	0.144	0.004				0.0005188	0.228	-0.07	0.0002594	0.222	-0.124				0.00104	0.176	-0.023				0.0002594	0.15	0.002
0.0005192	0.148	0.002				0.0005192	0.228	-0.066	0.0002596	0.222	-0.132				0.00104	0.178	-0.019				0.0002596	0.15	0.006
0.0005196	0.146	0.008				0.0005196	0.216	-0.066	0.0002598	0.222	-0.128				0.00104	0.178	-0.021				0.0002598	0.15	0.004
0.00052	0.15	0.006				0.00052	0.228	-0.062	0.00026	0.22	-0.128				0.00104	0.176	-0.019				0.00026	0.148	5.96047e-09
0.0005204	0.148	0.004				0.0005204	0.224	-0.066	0.0002602	0.222	-0.12				0.00104	0.18	-0.017				0.0002602	0.148	0.002
0.0005208	0.146	0.006				0.0005208	0.224	-0.058	0.0002604	0.22	-0.12				0.00104	0.178	-0.019				0.0002604	0.146	0.006
0.0005212	0.146	0.004				0.0005212	0.228	-0.062	0.0002606	0.218	-0.12				0.00104	0.176	-0.017				0.0002606	0.148	0.002
0.0005216	0.148	0.004				0.0005216	0.224	-0.054	0.0002608	0.22	-0.12				0.00104	0.18	-0.021				0.0002608	0.15	0.004
0.000522	0.148	0.004				0.000522	0.224	-0.058	0.000261	0.218	-0.12				0.00104	0.18	-0.017				0.000261	0.15	0.004
0.0005224	0.144	0.006				0.0005224	0.228	-0.058	0.0002612	0.216	-0.112				0.00104	0.182	-0.017				0.0002612	0.152	0.002
0.0005228	0.146	0.006				0.0005228	0.22	-0.054	0.0002614	0.216	-0.108				0.00105	0.18	-0.021				0.0002614	0.152	0.004
0.0005232	0.15	0.002				0.0005232	0.228	-0.054	0.0002616	0.216	-0.108				0.00105	0.18	-0.017				0.0002616	0.152	5.96047e-09
0.0005236	0.15	0.002				0.0005236	0.228	-0.054	0.0002618	0.216	-0.104				0.00105	0.178	-0.025				0.0002618	0.15	0.004
0.000524	0.148	0.004				0.000524	0.232	-0.05	0.000262	0.214	-0.108				0.00105	0.18	-0.025				0.000262	0.152	0.002
0.0005244	0.146	0.004				0.0005244	0.228	-0.054	0.0002622	0.212	-0.108				0.00105	0.178	-0.021				0.0002622	0.152	0.004
0.0005248	0.146	0.004				0.0005248	0.232	-0.046	0.0002624	0.212	-0.104				0.00105	0.178	-0.021				0.0002624	0.152	0.004
0.0005252	0.15	0.002				0.0005252	0.236	-0.05	0.0002626	0.212	-0.108				0.00105	0.176	-0.017				0.0002626	0.148	0.004
0.0005256	0.15	0.008				0.0005256	0.232	-0.054	0.0002628	0.212	-0.1				0.00105	0.178	-0.019				0.0002628	0.15	0.004
0.000526	0.146	0.004				0.000526	0.232	-0.05	0.000263	0.212	-0.1				0.00105	0.178	-0.019				0.000263	0.148	0.006
0.0005264	0.146	0.004				0.0005264	0.228	-0.046	0.0002632	0.21	-0.104				0.00105	0.176	-0.017				0.0002632	0.148	0.002
0.0005268	0.146	0.006				0.0005268	0.232	-0.05	0.0002634	0.212	-0.092				0.00105	0.172	-0.019				0.0002634	0.154	0.002
0.0005272	0.15	0.004				0.0005272	0.24	-0.05	0.0002636	0.208	-0.124				0.00105	0.176	-0.015				0.0002636	0.15	0.004
0.0005276	0.148	0.006				0.0005276	0.236	-0.046	0.0002638	0.208	-0.116				0.00106	0.174	-0.013				0.0002638	0.15	0.004
0.000528	0.148	0.006				0.000528	0.236	-0.042	0.000264	0.208	-0.116				0.00106	0.174	-0.015				0.000264	0.148	0.004
0.0005284	0.148	0.006				0.0005284	0.236	-0.038	0.0002642	0.208	-0.112				0.00106	0.174	-0.011				0.0002642	0.146	0.002
0.0005288	0.148	0.004				0.0005288	0.232	-0.038	0.0002644	0.206	-0.112				0.00106	0.174	-0.013				0.0002644	0.144	0.004
0.0005292	0.146	0.006				0.0005292	0.228	-0.05	0.0002646	0.206	-0.108				0.00106	0.174	-0.015				0.0002646	0.148	0.004
0.0005296	0.148	0.004				0.0005296	0.232	-0.042	0.0002648	0.204	-0.108				0.00106	0.174	-0.015				0.0002648	0.15	0.004
0.00053	0.148	0.004				0.00053	0.232	-0.046	0.000265	0.202	-0.1				0.00106	0.172	-0.013				0.000265	0.148	0.004
0.0005304	0.148	0.006				0.0005304	0.224	-0.042	0.0002652	0.204	-0.104				0.00106	0.174	-0.013				0.0002652	0.152	0.004
0.0005308	0.15	0.004				0.0005308	0.224	-0.038	0.0002654	0.202	-0.108				0.00106	0.172	-0.013				0.0002654	0.148	0.004
0.0005312	0.148	0.002				0.0005312	0.228	-0.038	0.0002656	0.202	-0.108				0.00106	0.176	-0.023				0.0002656	0.146	0.004
0.0005316	0.146	0.004				0.0005316	0.228	-0.038	0.0002658	0.202	-0.108				0.00106	0.176	-0.021				0.0002658	0.146	0.004
0.000532	0.146	0.004				0.000532	0.228	-0.054	0.000266	0.2	-0.104				0.00106	0.178	-0.033				0.000266	0.146	0.002
0.0005324	0.15	0.004				0.0005324	0.228	-0.05	0.0002662	0.2	-0.1				0.00106	0.176	-0.029				0.0002662	0.15	0.002
0.0005328	0.148	0.004				0.0005328	0.228	-0.058	0.0002664	0.202	-0.1				0.00107	0.18	-0.037				0.0002664	0.15	0.002
0.0005332	0.146	0.004				0.0005332	0.228	-0.054	0.0002666	0.2	-0.1				0.00107	0.176	-0.037				0.0002666	0.15	0.002
0.0005336	0.148	0.004				0.0005336	0.224	-0.05	0.0002668	0.198	-0.1				0.00107	0.178	-0.035				0.0002668	0.148	0.002
0.000534	0.148	0.004				0.000534	0.232	-0.046	0.000267	0.202	-0.088				0.00107	0.178	-0.033				0.000267	0.148	0.004
0.0005344	0.15	0.006				0.0005344	0.22	-0.05	0.0002672	0.2	-0.104				0.00107	0.178	-0.033				0.0002672	0.144	0.004
0.0005348	0.148	0.004				0.0005348	0.224	-0.054	0.0002674	0.2	-0.096				0.00107	0.176	-0.031				0.0002674	0.148	0.006
0.0005352	0.148	0.004				0.0005352	0.224	-0.046	0.0002676	0.198	-0.092				0.00107	0.178	-0.031				0.0002676	0.148	0.002
0.0005356	0.15	0.006				0.0005356	0.216	-0.05	0.0002678	0.2	-0.092				0.00107	0.178	-0.029				0.0002678	0.146	0.004
0.000536	0.148	0.004				0.000536	0.224	-0.062	0.000268	0.2	-0.092				0.00107	0.178	-0.029				0.000268	0.148	0.002
0.0005364	0.15	0.008				0.0005364	0.22	-0.066	0.0002682	0.198	-0.092				0.00107	0.18	-0.027				0.0002682	0.146	0.006
0.0005368	0.15	0.006				0.0005368	0.228	-0.066	0.0002684	0.202	-0.088				0.00107	0.18	-0.029				0.0002684	0.146	0.004
0.0005372	0.15	0.004				0.0005372	0.22	-0.066	0.0002686	0.202	-0.084				0.00107	0.18	-0.033				0.0002686	0.148	0.002
0.0005376	0.15	0.004				0.0005376	0.22	-0.066	0.0002688	0.2	-0.084				0.00108	0.18	-0.033				0.0002688	0.15	0.004
0.000538	0.148	0.004				0.000538	0.22	-0.054	0.000269	0.202	-0.08				0.00108	0.18	-0.029				0.000269	0.146	0.006
0.0005384	0.148	0.004				0.0005384	0.224	-0.062	0.0002692	0.204	-0.08				0.00108	0.182	-0.025				0.0002692	0.146	0.006
0.0005388	0.152	0.002				0.0005388	0.22	-0.058	0.0002694	0.202	-0.08				0.00108	0.18	-0.029				0.0002694	0.144	0.004
0.0005392	0.152	0.004				0.0005392	0.216	-0.054	0.0002696	0.204	-0.096				0.00108	0.18	-0.029				0.0002696	0.146	0.004
0.0005396	0.15	0.006				0.0005396	0.224	-0.054	0.0002698	0.2	-0.104				0.00108	0.182	-0.025				0.0002698	0.15	0.004
0.00054	0.152	0.002				0.00054	0.224	-0.05	0.00027	0.198	-0.1				0.00108	0.18	-0.023				0.00027	0.148	0.002
0.0005404	0.15	0.004				0.0005404	0.224	-0.05	0.0002702	0.198	-0.1				0.00108	0.182	-0.023				0.0002702	0.15	0.004
0.0005408	0.148	0.002				0.0005408	0.216	-0.046	0.0002704	0.198	-0.116				0.00108	0.18	-0.021				0.0002704	0.15	0.004
0.0005412	0.15	0.004				0.0005412	0.224	-0.058	0.0002706	0.2	-0.12				0.00108	0.184	-0.033				0.0002706	0.15	0.004
0.0005416	0.152	0.006				0.0005416	0.216	-0.05	0.0002708	0.2	-0.108				0.00108	0.18	-0.031				0.0002708	0.146	0.004
0.000542	0.15	0.006				0.000542	0.224	-0.054	0.000271	0.198	-0.108				0.00108	0.18	-0.029				0.000271	0.148	0.004
0.0005424	0.15	0.004				0.0005424	0.22	-0.054	0.0002712	0.2	-0.112				0.00108	0.182	-0.029				0.0002712	0.144	0.006
0.0005428	0.15	0.004				0.0005428	0.22	-0.042	0.0002714	0.2	-0.108				0.00109	0.18	-0.027				0.0002714	0.142	0.004
0.0005432	0.15	0.006				0.0005432	0.22	-0.058	0.0002716	0.198	-0.108				0.00109	0.184	-0.023				0.0002716	0.144	0.004
0.0005436	0.146	0.004				0.0005436	0.216	-0.046	0.0002718	0.198	-0.1				0.00109	0.184	-0.023				0.0002718	0.144	0.004
0.000544	0.152	0.004				0.000544	0.22	-0.054	0.000272	0.198	-0.108				0.00109	0.184	-0.023				0.000272	0.15	0.002
0.0005444	0.15	0.004				0.0005444	0.22	-0.05	0.0002722	0.196	-0.1				0.00109	0.182	-0.017				0.0002722	0.15	0.002
0.0005448	0.15	0.004				0.0005448	0.212	-0.05	0.0002724	0.198	-0.096				0.00109	0.184	-0.029				0.0002724	0.152	0.004
0.0005452	0.15	0.002				0.0005452	0.208	-0.046	0.0002726	0.196	-0.096				0.00109	0.184	-0.027				0.0002726	0.152	0.006
0.0005456	0.152	0.004				0.0005456	0.208	-0.042	0.0002728	0.2	-0.1				0.00109	0.184	-0.027				0.0002728	0.148	0.006
0.000546	0.152	0.004				0.000546	0.212	-0.042	0.000273	0.198	-0.096				0.00109	0.184	-0.023				0.000273	0.146	0.006
0.0005464	0.152	0.002				0.0005464	0.208	-0.046	0.0002732	0.2	-0.096				0.00109	0.184	-0.025				0.0002732	0.144	0.004
0.0005468	0.15	0.002				0.0005468	0.208	-0.046	0.0002734	0.198	-0.092				0.00109	0.182	-0.023				0.0002734	0.142	0.004
0.0005472	0.152	0.004				0.0005472	0.208	-0.038	0.0002736	0.2	-0.092				0.00109	0.184	-0.021				0.0002736	0.148	0.002
0.0005476	0.152	0.002				0.0005476	0.208	-0.038	0.0002738	0.198	-0.096				0.0011	0.188	-0.025				0.0002738	0.148	0.002
0.000548	0.154	0.004				0.000548	0.204	-0.042	0.000274	0.2	-0.088				0.0011	0.186	-0.019				0.000274	0.152	0.004
0.0005484	0.15	0.004				0.0005484	0.208	-0.038	0.0002742	0.2	-0.088				0.0011	0.186	-0.021				0.0002742	0.15	0.004
0.0005488	0.15	0.002				0.0005488	0.204	-0.034	0.0002744	0.204	-0.088				0.0011	0.188	-0.023				0.0002744	0.148	0.004
0.0005492	0.152	0.004				0.0005492	0.208	-0.042	0.0002746	0.206	-0.084				0.0011	0.188	-0.023				0.0002746	0.146	0.006
0.0005496	0.152	0.004				0.0005496	0.212	-0.034	0.0002748	0.204	-0.08				0.0011	0.188	-0.019				0.0002748	0.148	0.004
0.00055	0.154	0.004				0.00055	0.2	-0.034	0.000275	0.21	-0.088				0.0011	0.19	-0.019				0.000275	0.148	0.002
0.0005504	0.15	0.004							0.0002752	0.206	-0.076				0.0011	0.188	-0.025				0.0002752	0.144	0.002
0.0005508	0.154	0.002							0.0002754	0.206	-0.084				0.0011	0.19	-0.021				0.0002754	0.146	0.004
0.0005512	0.152	0.004							0.0002756	0.208	-0.084				0.0011	0.192	-0.023				0.0002756	0.146	5.96047e-09
0.0005516	0.154	0.004							0.0002758	0.21	-0.084				0.0011	0.194	-0.021				0.0002758	0.146	0.004
0.000552	0.15	0.004							0.000276	0.206	-0.088				0.0011	0.194	-0.019				0.000276	0.148	0.004
0.0005524	0.15	0.006							0.0002762	0.208	-0.08				0.0011	0.192	-0.023				0.0002762	0.15	-0.012
0.0005528	0.154	0.002							0.0002764	0.208	-0.084				0.00111	0.198	-0.019				0.0002764	0.15	-0.006
0.0005532	0.156	0.004							0.0002766	0.208	-0.08				0.00111	0.196	-0.027				0.0002766	0.15	-0.008
0.0005536	0.154	0.004							0.0002768	0.208	-0.08				0.00111	0.198	-0.027				0.0002768	0.15	-0.008
0.000554	0.152	0.004							0.000277	0.208	-0.084				0.00111	0.198	-0.027				0.000277	0.146	-0.008
0.0005544	0.15	0.004							0.0002772	0.206	-0.084				0.00111	0.198	-0.031				0.0002772	0.148	-0.008
0.0005548	0.15	0.002							0.0002774	0.208	-0.076				0.00111	0.2	-0.027				0.0002774	0.148	-0.008
0.0005552	0.156	0.002							0.0002776	0.212	-0.088				0.00111	0.2	-0.027				0.0002776	0.148	-0.008
0.0005556	0.156	0.006							0.0002778	0.21	-0.092				0.00111	0.2	-0.039				0.0002778	0.15	-0.008
0.000556	0.152	0.004							0.000278	0.21	-0.08				0.00111	0.202	-0.033				0.000278	0.148	-0.006
0.0005564	0.152	0.002							0.0002782	0.212	-0.072				0.00111	0.204	-0.033				0.0002782	0.146	-0.008
0.0005568	0.156	0.004							0.0002784	0.21	-0.08				0.00111	0.202	-0.031				0.0002784	0.148	-0.006
0.0005572	0.154	0.004							0.0002786	0.21	-0.072				0.00111	0.2	-0.031				0.0002786	0.146	-0.006
0.0005576	0.152	0.004							0.0002788	0.21	-0.08				0.00112	0.204	-0.027				0.0002788	0.148	-0.008
0.000558	0.154	0.002							0.000279	0.208	-0.076				0.00112	0.204	-0.027				0.000279	0.148	-0.008
0.0005584	0.152	0.002							0.0002792	0.208	-0.072				0.00112	0.204	-0.027				0.0002792	0.15	-0.004
0.0005588	0.154	0.004							0.0002794	0.208	-0.076				0.00112	0.204	-0.027				0.0002794	0.148	-0.004
0.0005592	0.152	0.004							0.0002796	0.21	-0.072				0.00112	0.202	-0.027				0.0002796	0.146	-0.006
0.0005596	0.154	5.96047e-09							0.0002798	0.206	-0.068				0.00112	0.206	-0.027				0.0002798	0.148	-0.006
0.00056	0.156	0.004							0.00028	0.208	-0.068				0.00112	0.208	-0.029				0.00028	0.15	-0.006
0.0005604	0.154	0.004							0.0002802	0.21	-0.068				0.00112	0.206	-0.027				0.0002802	0.148	-0.006
0.0005608	0.154	0.002							0.0002804	0.21	-0.072				0.00112	0.206	-0.023				0.0002804	0.15	-0.004
0.0005612	0.15	0.004							0.0002806	0.21	-0.064				0.00112	0.206	-0.027				0.0002806	0.148	-0.004
0.0005616	0.152	0.002							0.0002808	0.208	-0.068				0.00112	0.206	-0.025				0.0002808	0.146	-0.002
0.000562	0.154	0.004							0.000281	0.21	-0.072				0.00112	0.204	-0.023				0.000281	0.146	-0.008
0.0005624	0.154	0.004							0.0002812	0.208	-0.064				0.00112	0.206	-0.025				0.0002812	0.144	-0.012
0.0005628	0.15	0.002							0.0002814	0.212	-0.064				0.00113	0.208	-0.031				0.0002814	0.148	-0.008
0.0005632	0.154	5.96047e-09							0.0002816	0.214	-0.064				0.00113	0.206	-0.031				0.0002816	0.152	-0.01
0.0005636	0.15	0.006							0.0002818	0.212	-0.056				0.00113	0.206	-0.029				0.0002818	0.15	-0.008
0.000564	0.15	0.004							0.000282	0.21	-0.06				0.00113	0.204	-0.027				0.000282	0.152	-0.008
0.0005644	0.152	-0.014							0.0002822	0.214	-0.056				0.00113	0.206	-0.031				0.0002822	0.148	-0.008
0.0005648	0.152	-0.014							0.0002824	0.216	-0.06				0.00113	0.204	-0.033				0.0002824	0.148	-0.01
0.0005652	0.152	-0.012							0.0002826	0.216	-0.056				0.00113	0.206	-0.033				0.0002826	0.148	-0.008
0.0005656	0.154	-0.014							0.0002828	0.214	-0.052				0.00113	0.206	-0.031				0.0002828	0.15	-0.01
0.000566	0.156	-0.01							0.000283	0.218	-0.052				0.00113	0.21	-0.031				0.000283	0.15	-0.01
0.0005664	0.152	-0.01							0.0002832	0.218	-0.056				0.00113	0.208	-0.029				0.0002832	0.148	-0.008
0.0005668	0.15	-0.012							0.0002834	0.218	-0.052				0.00113	0.208	-0.039				0.0002834	0.148	-0.006
[truncated: 1,583 more rows]

## Sheet: Φ= 0.5  P= 5.0 atm 
Φ= 0.5 P= 4.45atm T= 1200 K			Φ= 0.5 P= 4.62atm T= 1350 K -			Φ= 0.5 P= 4.90atm T= 1162 K			Φ= 0.5 P= 5.02atm T= 1195 K			Φ= 0.5 P= 5.25atm T= 1280 K			Φ= 0.5 P= 5.29atm T= 1280 K			Φ= 0.5 P= 5.29atm T= 1345 K			Φ= 0.5 P= 5.36atm T= 1220 K			Φ= 0.5 P= 5.39atm T= 1142 K			Φ= 0.5 P= 5.41atm T= 1243 K
Time(µs)	Pressure (arbitrary unit)	CH* trance(arbitrary unit)	Time(µs)	Pressure (arbitrary unit)	CH* trance(arbitrary unit)	Time(µs)	Pressure (arbitrary unit)	CH* trance(arbitrary unit)	Time(µs)	Pressure (arbitrary unit)	CH* trance(arbitrary unit)	Time(µs)	Pressure (arbitrary unit)	CH* trance(arbitrary unit)	Time(µs)	Pressure (arbitrary unit)	CH* trance(arbitrary unit)	Time(µs)	Pressure (arbitrary unit)	CH* trance(arbitrary unit)	Time(µs)	Pressure (arbitrary unit)	CH* trance(arbitrary unit)	Time(µs)	Pressure (arbitrary unit)	CH* trance(arbitrary unit)	Time(µs)	Pressure (arbitrary unit)	CH* trance(arbitrary unit)
-0.000116	-0.008	0.004	-0.0002	-0.008	-0.004	-0.000224	-0.004	0.004	-0.0004	-0.008	0.008	-0.000116	-0.016	1.19209e-08	-0.0001	-0.008	1.19209e-08	-4.64e-05	0.056	0.004	-0.0004	-0.016	1.19209e-08	-0.0004	-0.008	1.19209e-08	-0.0002	-0.024	-0.01
-0.0001158	-0.008	0.004	-0.0001996	0.008	-0.004	-0.0002236	-0.004	0.004	-0.0003992	5.96047e-09	2.38419e-08	-0.0001158	-0.008	1.19209e-08	-9.98e-05	-0.016	1.19209e-08	-4.632e-05	0.064	0.002	-0.0003992	-0.024	1.19209e-08	-0.0003992	-0.008	0.004	-0.0001996	-0.008	-0.006
-0.0001156	0.008	0.004	-0.0001992	-2.08616e-08	-0.004	-0.0002232	-0.012	-0.004	-0.0003984	5.96047e-09	-0.008	-0.0001156	-0.008	1.19209e-08	-9.96e-05	1.34111e-08	0.004	-4.624e-05	0.048	0.002	-0.0003984	-0.016	1.19209e-08	-0.0003984	-0.008	-0.012	-0.0001992	-0.016	-0.014
-0.0001154	-0.008	0.004	-0.0001988	-2.08616e-08	-0.012	-0.0002228	-0.004	0.004	-0.0003976	-0.016	2.38419e-08	-0.0001154	-0.008	0.008	-9.94e-05	-0.008	-0.004	-4.616e-05	0.064	0.006	-0.0003976	-0.016	1.19209e-08	-0.0003976	-0.008	1.19209e-08	-0.0001988	-0.016	-0.014
-0.0001152	-0.016	0.008	-0.0001984	-0.008	-0.012	-0.0002224	-0.012	-0.004	-0.0003968	-0.016	2.38419e-08	-0.0001152	-0.008	1.19209e-08	-9.92e-05	-0.016	-0.004	-4.608e-05	0.064	0.004	-0.0003968	-0.016	1.19209e-08	-0.0003968	-0.016	1.19209e-08	-0.0001984	-0.016	-0.01
-0.000115	-0.016	0.012	-0.000198	-2.08616e-08	-0.012	-0.000222	-0.012	0.004	-0.000396	-0.008	2.38419e-08	-0.000115	-0.016	1.19209e-08	-9.9e-05	-0.016	-0.004	-4.6e-05	0.056	0.004	-0.000396	-0.016	1.19209e-08	-0.000396	-0.016	-0.004	-0.000198	-0.016	-0.006
-0.0001148	-0.008	0.004	-0.0001976	-0.008	0.004	-0.0002216	-0.004	0.004	-0.0003952	-0.008	0.008	-0.0001148	-0.016	1.19209e-08	-9.88e-05	-0.008	1.19209e-08	-4.592e-05	0.056	0.004	-0.0003952	-0.024	-0.004	-0.0003952	-0.008	1.19209e-08	-0.0001976	-0.016	-0.006
-0.0001146	-0.008	1.19209e-08	-0.0001972	0.008	-0.004	-0.0002212	-0.012	0.004	-0.0003944	-0.016	-0.008	-0.0001146	-0.008	1.19209e-08	-9.86e-05	1.34111e-08	-0.004	-4.584e-05	0.056	0.004	-0.0003944	-0.016	1.19209e-08	-0.0003944	-0.008	1.19209e-08	-0.0001972	-0.008	-0.006
-0.0001144	-0.008	1.19209e-08	-0.0001968	-2.08616e-08	-0.012	-0.0002208	-0.004	-0.004	-0.0003936	-0.008	0.008	-0.0001144	-0.008	1.19209e-08	-9.84e-05	0.008	1.19209e-08	-4.576e-05	0.04	0.004	-0.0003936	-0.008	1.19209e-08	-0.0003936	1.34111e-08	1.19209e-08	-0.0001968	-0.024	-0.01
-0.0001142	1.34111e-08	0.008	-0.0001964	-2.08616e-08	-0.012	-0.0002204	-0.02	-0.004	-0.0003928	-0.016	0.008	-0.0001142	-0.016	-0.004	-9.82e-05	1.34111e-08	1.19209e-08	-4.568e-05	0.056	0.006	-0.0003928	-0.016	0.004	-0.0003928	-0.008	1.19209e-08	-0.0001964	-0.016	-0.01
-0.000114	1.34111e-08	0.008	-0.000196	-0.016	-0.02	-0.00022	-0.012	-0.004	-0.000392	-0.016	2.38419e-08	-0.000114	-0.008	1.19209e-08	-9.8e-05	0.008	0.004	-4.56e-05	0.04	0.006	-0.000392	-0.008	1.19209e-08	-0.000392	-0.016	1.19209e-08	-0.000196	-0.008	-0.006
-0.0001138	-0.008	1.19209e-08	-0.0001956	-0.008	-0.004	-0.0002196	0.004	-0.004	-0.0003912	5.96047e-09	2.38419e-08	-0.0001138	-0.008	-0.004	-9.78e-05	1.34111e-08	-0.004	-4.552e-05	0.048	0.002	-0.0003912	0.008	1.19209e-08	-0.0003912	-0.016	-0.004	-0.0001956	-0.016	-0.01
-0.0001136	-0.008	1.19209e-08	-0.0001952	-0.016	-0.012	-0.0002192	-0.004	-0.004	-0.0003904	-0.016	2.38419e-08	-0.0001136	-0.008	-0.004	-9.76e-05	1.34111e-08	-0.004	-4.544e-05	0.04	0.004	-0.0003904	-0.016	1.19209e-08	-0.0003904	1.34111e-08	1.19209e-08	-0.0001952	-0.016	-0.002
-0.0001134	-0.016	1.19209e-08	-0.0001948	-2.08616e-08	0.004	-0.0002188	-0.02	0.004	-0.0003896	-0.016	2.38419e-08	-0.0001134	1.34111e-08	1.19209e-08	-9.74e-05	-0.016	0.004	-4.536e-05	0.056	0.006	-0.0003896	-0.024	1.19209e-08	-0.0003896	-0.008	1.19209e-08	-0.0001948	-0.024	-0.002
-0.0001132	-0.008	0.004	-0.0001944	-0.008	-0.012	-0.0002184	-0.012	-0.004	-0.0003888	-0.024	0.008	-0.0001132	-0.008	1.19209e-08	-9.72e-05	-0.008	1.19209e-08	-4.528e-05	0.048	0.004	-0.0003888	-0.008	0.004	-0.0003888	-0.024	0.004	-0.0001944	-0.016	-0.006
-0.000113	-0.016	0.008	-0.000194	-2.08616e-08	-0.012	-0.000218	-0.012	0.004	-0.000388	5.96047e-09	2.38419e-08	-0.000113	-0.008	0.004	-9.7e-05	-0.008	1.19209e-08	-4.52e-05	0.048	0.002	-0.000388	-0.016	1.19209e-08	-0.000388	-0.008	-0.004	-0.000194	-2.08616e-08	-0.006
-0.0001128	-0.016	0.012	-0.0001936	-2.08616e-08	-0.004	-0.0002176	-0.004	-0.004	-0.0003872	5.96047e-09	2.38419e-08	-0.0001128	1.34111e-08	1.19209e-08	-9.68e-05	-0.008	1.19209e-08	-4.512e-05	0.04	0.002	-0.0003872	-0.008	1.19209e-08	-0.0003872	-0.024	1.19209e-08	-0.0001936	-0.008	-0.014
-0.0001126	-0.008	0.008	-0.0001932	-0.024	0.004	-0.0002172	-0.02	-0.004	-0.0003864	-0.032	2.38419e-08	-0.0001126	-0.016	1.19209e-08	-9.66e-05	1.34111e-08	0.004	-4.504e-05	0.04	0.002	-0.0003864	-0.016	1.19209e-08	-0.0003864	-0.008	0.004	-0.0001932	-0.016	-0.01
-0.0001124	1.34111e-08	1.19209e-08	-0.0001928	-0.008	-0.004	-0.0002168	-0.004	0.004	-0.0003856	-0.016	2.38419e-08	-0.0001124	-0.008	-0.004	-9.64e-05	-0.008	1.19209e-08	-4.496e-05	0.056	0.002	-0.0003856	-0.008	1.19209e-08	-0.0003856	-0.008	1.19209e-08	-0.0001928	-0.016	-0.014
-0.0001122	-0.008	1.19209e-08	-0.0001924	-0.008	-0.004	-0.0002164	-0.004	-0.004	-0.0003848	-0.008	2.38419e-08	-0.0001122	-0.008	1.19209e-08	-9.62e-05	-0.016	0.004	-4.488e-05	0.048	0.002	-0.0003848	-0.008	1.19209e-08	-0.0003848	-0.016	1.19209e-08	-0.0001924	-0.016	-0.006
-0.000112	-0.008	0.004	-0.000192	-0.016	-0.004	-0.000216	-0.012	0.004	-0.000384	-0.016	-0.008	-0.000112	-0.008	1.19209e-08	-9.6e-05	-0.016	-0.004	-4.48e-05	0.04	0.006	-0.000384	-0.008	1.19209e-08	-0.000384	-0.008	1.19209e-08	-0.000192	-0.016	-0.006
-0.0001118	-0.008	1.19209e-08	-0.0001916	-0.016	-0.012	-0.0002156	-0.012	0.004	-0.0003832	-0.008	2.38419e-08	-0.0001118	-0.008	0.004	-9.58e-05	-0.008	1.19209e-08	-4.472e-05	0.04	0.004	-0.0003832	-0.016	0.004	-0.0003832	-0.008	1.19209e-08	-0.0001916	-0.008	-0.002
-0.0001116	1.34111e-08	1.19209e-08	-0.0001912	-2.08616e-08	-0.012	-0.0002152	-0.004	0.004	-0.0003824	-0.016	2.38419e-08	-0.0001116	-0.008	1.19209e-08	-9.56e-05	1.34111e-08	1.19209e-08	-4.464e-05	0.04	0.006	-0.0003824	-0.016	0.004	-0.0003824	-0.016	-0.008	-0.0001912	-0.008	-0.006
-0.0001114	-0.008	0.004	-0.0001908	-2.08616e-08	-0.004	-0.0002148	-0.02	0.004	-0.0003816	-0.016	-0.008	-0.0001114	-0.008	1.19209e-08	-9.54e-05	-0.016	0.004	-4.456e-05	0.056	0.004	-0.0003816	-0.008	1.19209e-08	-0.0003816	-0.008	1.19209e-08	-0.0001908	-0.016	-0.01
-0.0001112	-0.008	0.004	-0.0001904	-0.008	-0.004	-0.0002144	-0.012	0.012	-0.0003808	-0.016	-0.008	-0.0001112	-0.008	1.19209e-08	-9.52e-05	-0.008	0.004	-4.448e-05	0.04	0.004	-0.0003808	-0.008	1.19209e-08	-0.0003808	-0.008	0.008	-0.0001904	-0.008	-0.01
-0.000111	1.34111e-08	0.008	-0.00019	-2.08616e-08	-0.004	-0.000214	-0.004	-0.004	-0.00038	-0.008	0.008	-0.000111	-0.008	1.19209e-08	-9.5e-05	-0.008	-0.008	-4.44e-05	0.048	0.006	-0.00038	-0.008	0.004	-0.00038	-0.016	0.004	-0.00019	-0.016	-0.014
-0.0001108	1.34111e-08	1.19209e-08	-0.0001896	-0.008	-0.004	-0.0002136	-0.004	0.004	-0.0003792	-0.008	2.38419e-08	-0.0001108	-0.008	1.19209e-08	-9.48e-05	1.34111e-08	1.19209e-08	-4.432e-05	0.048	0.002	-0.0003792	-0.024	1.19209e-08	-0.0003792	-0.016	1.19209e-08	-0.0001896	-0.016	-0.006
-0.0001106	0.008	1.19209e-08	-0.0001892	-0.016	-0.004	-0.0002132	-0.004	-0.004	-0.0003784	-0.008	-0.008	-0.0001106	-0.016	1.19209e-08	-9.46e-05	-0.016	-0.004	-4.424e-05	0.056	0.002	-0.0003784	1.34111e-08	0.004	-0.0003784	-0.016	1.19209e-08	-0.0001892	-0.016	-0.002
-0.0001104	-0.008	0.004	-0.0001888	-0.016	-0.004	-0.0002128	-0.004	0.004	-0.0003776	-0.016	2.38419e-08	-0.0001104	-0.016	1.19209e-08	-9.44e-05	-0.016	1.19209e-08	-4.416e-05	0.056	0.004	-0.0003776	-0.024	-0.004	-0.0003776	-0.016	-0.004	-0.0001888	-0.016	-0.006
-0.0001102	-0.016	1.19209e-08	-0.0001884	-0.008	-0.004	-0.0002124	-0.02	0.004	-0.0003768	-0.016	2.38419e-08	-0.0001102	-0.008	1.19209e-08	-9.42e-05	-0.008	-0.004	-4.408e-05	0.056	0.004	-0.0003768	1.34111e-08	-0.004	-0.0003768	-0.016	1.19209e-08	-0.0001884	-0.016	-0.006
-0.00011	-0.008	0.004	-0.000188	-0.008	-0.004	-0.000212	-0.02	-0.004	-0.000376	-0.008	0.008	-0.00011	-0.008	1.19209e-08	-9.4e-05	-0.008	-0.004	-4.4e-05	0.056	0.004	-0.000376	-0.008	1.19209e-08	-0.000376	-0.016	0.004	-0.000188	-0.016	-0.01
-0.0001098	-0.008	0.004	-0.0001876	-2.08616e-08	0.004	-0.0002116	-0.012	0.004	-0.0003752	-0.008	2.38419e-08	-0.0001098	-0.008	0.008	-9.38e-05	-0.008	1.19209e-08	-4.392e-05	0.064	0.002	-0.0003752	-0.008	-0.004	-0.0003752	-0.016	-0.004	-0.0001876	-0.016	-0.01
-0.0001096	1.34111e-08	0.004	-0.0001872	-0.008	-0.004	-0.0002112	-0.004	-0.004	-0.0003744	-0.008	2.38419e-08	-0.0001096	-0.008	0.004	-9.36e-05	-0.008	1.19209e-08	-4.384e-05	0.048	0.004	-0.0003744	-0.008	1.19209e-08	-0.0003744	-0.008	1.19209e-08	-0.0001872	-0.016	-0.01
-0.0001094	-0.008	0.008	-0.0001868	-0.008	-0.004	-0.0002108	-0.012	-0.004	-0.0003736	-0.008	2.38419e-08	-0.0001094	-0.016	1.19209e-08	-9.34e-05	-0.008	-0.004	-4.376e-05	0.064	0.004	-0.0003736	-0.008	1.19209e-08	-0.0003736	-0.016	0.004	-0.0001868	-0.016	-0.01
-0.0001092	-0.008	1.19209e-08	-0.0001864	-0.008	-0.004	-0.0002104	-0.02	-0.004	-0.0003728	-0.008	2.38419e-08	-0.0001092	-0.016	0.004	-9.32e-05	1.34111e-08	1.19209e-08	-4.368e-05	0.056	0.004	-0.0003728	-0.016	1.19209e-08	-0.0003728	-0.008	1.19209e-08	-0.0001864	-0.008	-0.002
-0.000109	-0.016	0.008	-0.000186	-0.008	-0.004	-0.00021	-0.004	0.004	-0.000372	-0.008	0.008	-0.000109	-0.008	0.004	-9.3e-05	-0.008	0.008	-4.36e-05	0.064	0.002	-0.000372	0.008	1.19209e-08	-0.000372	-0.008	-0.008	-0.000186	-0.024	-0.01
-0.0001088	-0.016	0.004	-0.0001856	0.008	-0.004	-0.0002096	-0.012	-0.004	-0.0003712	-0.008	-0.008	-0.0001088	-0.016	-0.004	-9.28e-05	-0.008	1.19209e-08	-4.352e-05	0.048	0.004	-0.0003712	-0.024	0.004	-0.0003712	-0.008	1.19209e-08	-0.0001856	-0.016	-0.006
-0.0001086	-0.008	0.004	-0.0001852	-0.008	-0.012	-0.0002092	-0.012	-0.004	-0.0003704	-0.008	2.38419e-08	-0.0001086	-0.008	1.19209e-08	-9.26e-05	-0.016	1.19209e-08	-4.344e-05	0.048	0.002	-0.0003704	-0.008	1.19209e-08	-0.0003704	-0.008	1.19209e-08	-0.0001852	-0.008	-0.01
-0.0001084	-0.016	-0.004	-0.0001848	-0.008	-0.02	-0.0002088	-0.012	-0.004	-0.0003696	-0.008	2.38419e-08	-0.0001084	1.34111e-08	-0.004	-9.24e-05	1.34111e-08	-0.008	-4.336e-05	0.048	0.002	-0.0003696	-0.016	-0.004	-0.0003696	-0.008	-0.004	-0.0001848	-0.016	-0.014
-0.0001082	-0.008	0.004	-0.0001844	-0.008	-0.004	-0.0002084	-0.02	0.004	-0.0003688	-0.008	2.38419e-08	-0.0001082	-0.008	1.19209e-08	-9.22e-05	-0.008	-0.004	-4.328e-05	0.048	0.002	-0.0003688	-0.016	1.19209e-08	-0.0003688	-0.016	1.19209e-08	-0.0001844	-0.024	-0.006
-0.000108	-0.016	1.19209e-08	-0.000184	-0.016	-0.012	-0.000208	-0.012	0.004	-0.000368	-0.008	2.38419e-08	-0.000108	-0.008	0.004	-9.2e-05	-0.016	1.19209e-08	-4.32e-05	0.04	0.004	-0.000368	1.34111e-08	1.19209e-08	-0.000368	1.34111e-08	1.19209e-08	-0.000184	-0.016	-0.002
-0.0001078	1.34111e-08	0.008	-0.0001836	-0.008	-0.012	-0.0002076	-0.004	0.004	-0.0003672	-0.008	2.38419e-08	-0.0001078	-0.008	-0.004	-9.18e-05	-0.024	1.19209e-08	-4.312e-05	0.04	0.006	-0.0003672	-0.008	1.19209e-08	-0.0003672	-0.016	0.004	-0.0001836	-0.008	-0.006
-0.0001076	-0.008	1.19209e-08	-0.0001832	-0.008	-0.012	-0.0002072	-0.012	-0.004	-0.0003664	5.96047e-09	-0.008	-0.0001076	-0.016	1.19209e-08	-9.16e-05	-0.016	-0.004	-4.304e-05	0.056	0.006	-0.0003664	-0.024	-0.004	-0.0003664	-0.008	1.19209e-08	-0.0001832	-0.008	-0.002
-0.0001074	-0.008	1.19209e-08	-0.0001828	-2.08616e-08	-0.004	-0.0002068	-0.004	0.004	-0.0003656	-0.016	2.38419e-08	-0.0001074	-0.016	0.008	-9.14e-05	-0.008	1.19209e-08	-4.296e-05	0.032	0.004	-0.0003656	1.34111e-08	-0.004	-0.0003656	-0.024	0.004	-0.0001828	-0.016	-0.01
-0.0001072	-0.016	1.19209e-08	-0.0001824	-0.008	-0.012	-0.0002064	-0.012	-0.004	-0.0003648	-0.008	2.38419e-08	-0.0001072	-0.016	1.19209e-08	-9.12e-05	-0.008	1.19209e-08	-4.288e-05	0.048	0.004	-0.0003648	-0.016	1.19209e-08	-0.0003648	-0.016	0.004	-0.0001824	-0.024	-0.006
-0.000107	-0.008	1.19209e-08	-0.000182	-0.008	-0.004	-0.000206	-0.004	0.004	-0.000364	-0.016	2.38419e-08	-0.000107	-0.016	1.19209e-08	-9.1e-05	-0.008	1.19209e-08	-4.28e-05	0.056	0.004	-0.000364	-0.016	0.004	-0.000364	-0.016	1.19209e-08	-0.000182	-0.016	-0.014
-0.0001068	-0.016	0.004	-0.0001816	-2.08616e-08	-0.004	-0.0002056	-0.012	-0.004	-0.0003632	-0.024	-0.016	-0.0001068	-0.008	1.19209e-08	-9.08e-05	-0.008	1.19209e-08	-4.272e-05	0.056	0.004	-0.0003632	-0.008	0.004	-0.0003632	-0.008	1.19209e-08	-0.0001816	-0.016	-0.01
-0.0001066	-0.016	0.008	-0.0001812	-0.016	-0.004	-0.0002052	-0.02	0.012	-0.0003624	-0.008	2.38419e-08	-0.0001066	-0.016	-0.004	-9.06e-05	-0.008	-0.004	-4.264e-05	0.056	0.004	-0.0003624	-0.016	-0.004	-0.0003624	-0.016	1.19209e-08	-0.0001812	-0.016	-0.01
-0.0001064	-0.016	1.19209e-08	-0.0001808	-0.024	-0.004	-0.0002048	-0.004	0.004	-0.0003616	-0.008	2.38419e-08	-0.0001064	-0.008	-0.004	-9.04e-05	1.34111e-08	-0.004	-4.256e-05	0.056	0.004	-0.0003616	-0.008	1.19209e-08	-0.0003616	-0.008	-0.004	-0.0001808	-0.024	-0.01
-0.0001062	-0.016	0.004	-0.0001804	-0.008	0.004	-0.0002044	-0.004	-0.004	-0.0003608	-0.016	-0.008	-0.0001062	-0.016	0.004	-9.02e-05	-0.008	-0.004	-4.248e-05	0.056	0.004	-0.0003608	-0.016	-0.004	-0.0003608	-0.016	1.19209e-08	-0.0001804	-0.016	-0.006
-0.000106	-0.008	1.19209e-08	-0.00018	-0.008	-0.004	-0.000204	-0.012	0.004	-0.00036	-0.008	-0.008	-0.000106	-0.016	0.004	-9e-05	-0.016	1.19209e-08	-4.24e-05	0.048	0.004	-0.00036	-0.016	1.19209e-08	-0.00036	-0.008	1.19209e-08	-0.00018	-0.016	-0.01
-0.0001058	-0.008	1.19209e-08	-0.0001796	-2.08616e-08	-0.004	-0.0002036	-0.004	-0.004	-0.0003592	5.96047e-09	2.38419e-08	-0.0001058	-0.008	1.19209e-08	-8.98e-05	-0.016	1.19209e-08	-4.232e-05	0.048	0.004	-0.0003592	-0.008	1.19209e-08	-0.0003592	-0.016	-0.004	-0.0001796	-0.016	-0.002
-0.0001056	1.34111e-08	1.19209e-08	-0.0001792	-2.08616e-08	-0.012	-0.0002032	-0.004	0.004	-0.0003584	5.96047e-09	2.38419e-08	-0.0001056	-0.008	1.19209e-08	-8.96e-05	-0.016	-0.004	-4.224e-05	0.048	0.004	-0.0003584	-0.016	1.19209e-08	-0.0003584	-0.016	0.004	-0.0001792	-0.008	-0.01
-0.0001054	-0.008	0.004	-0.0001788	-0.008	-0.012	-0.0002028	-0.004	-0.004	-0.0003576	-0.008	-0.008	-0.0001054	-0.008	0.004	-8.94e-05	-0.008	-0.004	-4.216e-05	0.048	0.004	-0.0003576	-0.016	1.19209e-08	-0.0003576	-0.008	1.19209e-08	-0.0001788	-0.016	-0.01
-0.0001052	-0.008	1.19209e-08	-0.0001784	-0.008	-0.004	-0.0002024	-0.012	-0.004	-0.0003568	-0.016	2.38419e-08	-0.0001052	-0.008	1.19209e-08	-8.92e-05	-0.016	-0.004	-4.208e-05	0.048	0.002	-0.0003568	-0.008	-0.004	-0.0003568	-0.008	1.19209e-08	-0.0001784	-0.016	-0.006
-0.000105	-0.016	0.008	-0.000178	-0.024	-0.004	-0.000202	-0.004	-0.004	-0.000356	-0.016	2.38419e-08	-0.000105	-0.008	1.19209e-08	-8.9e-05	-0.016	-0.004	-4.2e-05	0.04	0.002	-0.000356	-0.008	0.004	-0.000356	-0.008	-0.004	-0.000178	-0.024	-0.006
-0.0001048	-0.008	1.19209e-08	-0.0001776	-0.008	-0.004	-0.0002016	-0.004	-0.004	-0.0003552	-0.008	2.38419e-08	-0.0001048	-0.008	0.004	-8.88e-05	-0.008	1.19209e-08	-4.192e-05	0.04	0.006	-0.0003552	1.34111e-08	0.004	-0.0003552	1.34111e-08	-0.004	-0.0001776	-0.016	-0.01
-0.0001046	1.34111e-08	0.008	-0.0001772	-2.08616e-08	-0.004	-0.0002012	-0.012	0.004	-0.0003544	-0.024	2.38419e-08	-0.0001046	-0.016	1.19209e-08	-8.86e-05	1.34111e-08	-0.008	-4.184e-05	0.04	0.004	-0.0003544	-0.016	-0.008	-0.0003544	-0.016	1.19209e-08	-0.0001772	-0.008	-0.002
-0.0001044	-0.016	1.19209e-08	-0.0001768	-2.08616e-08	-0.012	-0.0002008	-0.012	-0.004	-0.0003536	-0.024	2.38419e-08	-0.0001044	-0.008	1.19209e-08	-8.84e-05	-0.008	1.19209e-08	-4.176e-05	0.048	0.004	-0.0003536	-0.024	1.19209e-08	-0.0003536	-0.008	-0.004	-0.0001768	-0.008	-0.002
-0.0001042	-0.024	0.004	-0.0001764	-2.08616e-08	-0.012	-0.0002004	-0.004	0.004	-0.0003528	-0.008	2.38419e-08	-0.0001042	1.34111e-08	1.19209e-08	-8.82e-05	-0.016	-0.004	-4.168e-05	0.04	0.004	-0.0003528	-0.008	-0.008	-0.0003528	-0.016	-0.008	-0.0001764	-0.008	-0.01
-0.000104	1.34111e-08	0.004	-0.000176	-2.08616e-08	-0.012	-0.0002	-0.012	-0.004	-0.000352	-0.016	2.38419e-08	-0.000104	-0.008	0.004	-8.8e-05	-0.016	-0.004	-4.16e-05	0.04	0.006	-0.000352	-0.008	-0.008	-0.000352	-0.008	-0.004	-0.000176	-0.008	-0.014
-0.0001038	-0.008	0.004	-0.0001756	-0.016	0.004	-0.0001996	-0.02	-0.004	-0.0003512	-0.016	-0.008	-0.0001038	-0.008	0.004	-8.78e-05	1.34111e-08	1.19209e-08	-4.152e-05	0.048	0.004	-0.0003512	-0.008	0.004	-0.0003512	-0.008	1.19209e-08	-0.0001756	-0.008	-0.006
-0.0001036	-0.008	1.19209e-08	-0.0001752	-0.016	-0.004	-0.0001992	-0.004	-0.004	-0.0003504	-0.016	0.008	-0.0001036	-0.016	-0.004	-8.76e-05	-0.008	-0.004	-4.144e-05	0.048	0.004	-0.0003504	-0.008	1.19209e-08	-0.0003504	-0.008	0.004	-0.0001752	-0.032	-0.006
-0.0001034	-0.016	1.19209e-08	-0.0001748	-0.016	-0.004	-0.0001988	-0.004	0.004	-0.0003496	-0.016	2.38419e-08	-0.0001034	-0.016	1.19209e-08	-8.74e-05	-0.008	1.19209e-08	-4.136e-05	0.048	0.002	-0.0003496	-0.016	1.19209e-08	-0.0003496	-0.016	1.19209e-08	-0.0001748	-0.016	-0.01
-0.0001032	-0.008	1.19209e-08	-0.0001744	-0.016	0.004	-0.0001984	-0.012	-0.004	-0.0003488	-0.024	0.008	-0.0001032	-0.016	1.19209e-08	-8.72e-05	1.34111e-08	1.19209e-08	-4.128e-05	0.048	0.002	-0.0003488	-0.008	-0.004	-0.0003488	-0.008	-0.004	-0.0001744	-0.016	-0.006
-0.000103	1.34111e-08	0.004	-0.000174	-2.08616e-08	-0.012	-0.000198	-0.012	0.004	-0.000348	5.96047e-09	-0.008	-0.000103	-0.008	-0.004	-8.7e-05	-0.016	-0.004	-4.12e-05	0.056	0.002	-0.000348	-0.016	-0.004	-0.000348	-0.016	0.004	-0.000174	-0.016	-0.002
-0.0001028	1.34111e-08	1.19209e-08	-0.0001736	-0.008	-0.004	-0.0001976	-0.012	-0.004	-0.0003472	-0.008	2.38419e-08	-0.0001028	1.34111e-08	1.19209e-08	-8.68e-05	-0.008	1.19209e-08	-4.112e-05	0.056	0.004	-0.0003472	-0.008	-0.004	-0.0003472	-0.016	-0.004	-0.0001736	-0.008	-0.01
-0.0001026	-0.008	0.008	-0.0001732	-0.016	-0.012	-0.0001972	-0.02	-0.004	-0.0003464	-0.016	2.38419e-08	-0.0001026	-0.008	1.19209e-08	-8.66e-05	-0.016	1.19209e-08	-4.104e-05	0.064	0.004	-0.0003464	-0.024	-0.004	-0.0003464	-0.016	1.19209e-08	-0.0001732	-0.008	-0.006
-0.0001024	-0.008	0.012	-0.0001728	-2.08616e-08	-0.02	-0.0001968	-0.02	-0.004	-0.0003456	5.96047e-09	2.38419e-08	-0.0001024	-0.008	1.19209e-08	-8.64e-05	-0.016	1.19209e-08	-4.096e-05	0.056	0.002	-0.0003456	-0.008	-0.004	-0.0003456	-0.008	0.004	-0.0001728	-0.008	-0.01
-0.0001022	-0.008	0.004	-0.0001724	0.008	0.004	-0.0001964	-0.012	-0.004	-0.0003448	-0.016	2.38419e-08	-0.0001022	-0.008	1.19209e-08	-8.62e-05	-0.008	-0.004	-4.088e-05	0.056	0.002	-0.0003448	-0.008	-0.008	-0.0003448	-0.008	-0.004	-0.0001724	-0.016	-0.01
-0.000102	-0.016	0.004	-0.000172	-0.016	-0.004	-0.000196	-0.004	-0.004	-0.000344	-0.008	2.38419e-08	-0.000102	-0.008	1.19209e-08	-8.6e-05	-0.008	-0.004	-4.08e-05	0.064	0.004	-0.000344	-0.008	-0.004	-0.000344	-0.008	1.19209e-08	-0.000172	-0.032	-0.002
-0.0001018	-0.008	0.004	-0.0001716	-0.008	-0.004	-0.0001956	-0.012	-0.004	-0.0003432	-0.016	-0.008	-0.0001018	-0.016	1.19209e-08	-8.58e-05	1.34111e-08	-0.004	-4.072e-05	0.056	0.004	-0.0003432	-0.016	-0.004	-0.0003432	-0.008	1.19209e-08	-0.0001716	-0.016	-0.006
-0.0001016	1.34111e-08	0.004	-0.0001712	-2.08616e-08	0.004	-0.0001952	-0.004	0.004	-0.0003424	-0.016	2.38419e-08	-0.0001016	-0.016	0.004	-8.56e-05	1.34111e-08	1.19209e-08	-4.064e-05	0.048	0.006	-0.0003424	-0.008	-0.004	-0.0003424	-0.008	1.19209e-08	-0.0001712	-0.008	-0.006
-0.0001014	1.34111e-08	0.004	-0.0001708	-0.008	0.004	-0.0001948	-0.012	0.004	-0.0003416	-0.008	2.38419e-08	-0.0001014	1.34111e-08	0.008	-8.54e-05	-0.008	-0.004	-4.056e-05	0.048	0.004	-0.0003416	-0.016	-0.008	-0.0003416	-0.016	0.004	-0.0001708	-2.08616e-08	-0.006
-0.0001012	0.008	1.19209e-08	-0.0001704	-0.008	-0.004	-0.0001944	-0.004	0.004	-0.0003408	-0.016	-0.008	-0.0001012	1.34111e-08	0.004	-8.52e-05	-0.008	-0.004	-4.048e-05	0.04	0.004	-0.0003408	-0.016	-0.008	-0.0003408	-0.008	-0.004	-0.0001704	-0.016	-0.014
-0.000101	1.34111e-08	0.004	-0.00017	-0.008	-0.02	-0.000194	-0.012	-0.004	-0.00034	-0.008	2.38419e-08	-0.000101	-0.008	0.004	-8.5e-05	-0.016	-0.004	-4.04e-05	0.032	0.008	-0.00034	-0.016	-0.004	-0.00034	-0.008	0.004	-0.00017	-0.032	-0.006
-0.0001008	1.34111e-08	0.008	-0.0001696	-0.008	0.004	-0.0001936	-0.012	-0.004	-0.0003392	-0.008	2.38419e-08	-0.0001008	-0.008	1.19209e-08	-8.48e-05	-0.008	1.19209e-08	-4.032e-05	0.048	0.006	-0.0003392	-0.024	-0.004	-0.0003392	-0.024	-0.004	-0.0001696	-0.016	-0.006
-0.0001006	-0.008	0.012	-0.0001692	-0.016	-0.004	-0.0001932	-0.02	-0.004	-0.0003384	-0.016	2.38419e-08	-0.0001006	-0.008	-0.004	-8.46e-05	-0.016	-0.004	-4.024e-05	0.04	0.004	-0.0003384	-0.008	-0.008	-0.0003384	-0.008	1.19209e-08	-0.0001692	-0.016	-0.006
-0.0001004	-0.008	0.004	-0.0001688	-2.08616e-08	-0.012	-0.0001928	-0.02	0.004	-0.0003376	-0.008	-0.008	-0.0001004	-0.016	1.19209e-08	-8.44e-05	-0.008	-0.008	-4.016e-05	0.048	0.002	-0.0003376	1.34111e-08	1.19209e-08	-0.0003376	-0.016	1.19209e-08	-0.0001688	-0.016	0.002
-0.0001002	-0.008	1.19209e-08	-0.0001684	-0.008	-0.012	-0.0001924	-0.012	-0.004	-0.0003368	-0.016	-0.008	-0.0001002	-0.008	1.19209e-08	-8.42e-05	-0.008	-0.008	-4.008e-05	0.04	0.002	-0.0003368	-0.024	-0.004	-0.0003368	-0.016	1.19209e-08	-0.0001684	-0.016	-0.01
-0.0001	-0.024	1.19209e-08	-0.000168	-2.08616e-08	-0.004	-0.000192	-0.004	0.004	-0.000336	-0.008	2.38419e-08	-0.0001	1.34111e-08	0.004	-8.4e-05	-0.008	1.19209e-08	-4e-05	0.048	0.004	-0.000336	-0.016	0.004	-0.000336	-0.016	1.19209e-08	-0.000168	-0.016	-0.006
-9.98e-05	-0.024	0.008	-0.0001676	-2.08616e-08	-0.004	-0.0001916	-0.012	-0.004	-0.0003352	-0.008	2.38419e-08	-9.98e-05	-0.008	1.19209e-08	-8.38e-05	-0.008	-0.004	-3.992e-05	0.048	0.002	-0.0003352	-0.024	-0.004	-0.0003352	-0.008	1.19209e-08	-0.0001676	-0.024	-0.01
-9.96e-05	-0.008	0.004	-0.0001672	-0.016	-0.012	-0.0001912	-0.012	0.004	-0.0003344	-0.016	-0.008	-9.96e-05	-0.008	1.19209e-08	-8.36e-05	-0.008	1.19209e-08	-3.984e-05	0.04	0.004	-0.0003344	-0.008	1.19209e-08	-0.0003344	-0.016	0.004	-0.0001672	-0.016	-0.006
-9.94e-05	-0.016	1.19209e-08	-0.0001668	-2.08616e-08	-0.004	-0.0001908	-0.02	0.012	-0.0003336	-0.008	2.38419e-08	-9.94e-05	-0.008	0.012	-8.34e-05	-0.016	-0.008	-3.976e-05	0.04	0.004	-0.0003336	-0.016	1.19209e-08	-0.0003336	-0.016	-0.008	-0.0001668	-0.008	-0.006
-9.92e-05	-0.008	1.19209e-08	-0.0001664	-0.008	-0.004	-0.0001904	-0.012	0.004	-0.0003328	-0.008	2.38419e-08	-9.92e-05	-0.008	1.19209e-08	-8.32e-05	-0.008	1.19209e-08	-3.968e-05	0.04	0.004	-0.0003328	1.34111e-08	1.19209e-08	-0.0003328	-0.008	1.19209e-08	-0.0001664	-0.016	-0.002
-9.9e-05	-0.008	0.004	-0.000166	-0.008	-0.004	-0.00019	-0.02	0.004	-0.000332	-0.008	-0.008	-9.9e-05	-0.008	1.19209e-08	-8.3e-05	-0.024	-0.004	-3.96e-05	0.056	0.002	-0.000332	-0.024	-0.004	-0.000332	-0.008	1.19209e-08	-0.000166	-0.016	-0.006
-9.88e-05	-0.008	0.004	-0.0001656	0.008	-0.004	-0.0001896	-0.012	-0.004	-0.0003312	5.96047e-09	2.38419e-08	-9.88e-05	-0.016	0.004	-8.28e-05	-0.016	1.19209e-08	-3.952e-05	0.048	0.006	-0.0003312	-0.008	-0.004	-0.0003312	-0.016	-0.004	-0.0001656	-0.016	-0.006
-9.86e-05	-0.008	1.19209e-08	-0.0001652	-0.008	-0.02	-0.0001892	-0.02	-0.004	-0.0003304	-0.008	2.38419e-08	-9.86e-05	-0.016	1.19209e-08	-8.26e-05	-0.008	-0.004	-3.944e-05	0.048	0.004	-0.0003304	-0.008	1.19209e-08	-0.0003304	-0.016	1.19209e-08	-0.0001652	-0.024	-0.002
-9.84e-05	-0.008	1.19209e-08	-0.0001648	-0.008	-0.004	-0.0001888	-0.012	0.004	-0.0003296	-0.024	0.008	-9.84e-05	-0.008	-0.004	-8.24e-05	-0.016	1.19209e-08	-3.936e-05	0.056	0.004	-0.0003296	-0.008	-0.004	-0.0003296	-0.008	1.19209e-08	-0.0001648	-0.016	-0.006
-9.82e-05	-0.016	0.008	-0.0001644	-2.08616e-08	-0.004	-0.0001884	-0.012	-0.004	-0.0003288	-0.016	2.38419e-08	-9.82e-05	-0.008	1.19209e-08	-8.22e-05	-0.008	1.19209e-08	-3.928e-05	0.056	0.004	-0.0003288	-0.016	-0.004	-0.0003288	-0.016	1.19209e-08	-0.0001644	-0.008	-0.006
-9.8e-05	1.34111e-08	0.004	-0.000164	-0.008	-0.012	-0.000188	-0.028	0.004	-0.000328	-0.024	-0.008	-9.8e-05	-0.008	0.004	-8.2e-05	-0.008	0.004	-3.92e-05	0.064	0.004	-0.000328	-0.016	-0.004	-0.000328	-0.008	1.19209e-08	-0.000164	-0.016	-0.002
-9.78e-05	-0.016	0.004	-0.0001636	-2.08616e-08	0.004	-0.0001876	0.004	0.004	-0.0003272	-0.008	2.38419e-08	-9.78e-05	-0.016	1.19209e-08	-8.18e-05	-0.008	1.19209e-08	-3.912e-05	0.048	0.004	-0.0003272	-0.016	0.004	-0.0003272	-0.008	1.19209e-08	-0.0001636	-0.016	-0.006
-9.76e-05	-0.008	0.004	-0.0001632	-0.008	-0.004	-0.0001872	0.004	-0.004	-0.0003264	-0.016	2.38419e-08	-9.76e-05	1.34111e-08	1.19209e-08	-8.16e-05	-0.016	-0.004	-3.904e-05	0.056	0.002	-0.0003264	-0.008	-0.004	-0.0003264	-0.016	1.19209e-08	-0.0001632	-0.016	-0.006
-9.74e-05	-0.008	1.19209e-08	-0.0001628	-2.08616e-08	-0.012	-0.0001868	-0.004	-0.004	-0.0003256	-0.008	2.38419e-08	-9.74e-05	-0.016	1.19209e-08	-8.14e-05	1.34111e-08	0.004	-3.896e-05	0.056	0.004	-0.0003256	-0.024	-0.008	-0.0003256	-0.008	0.008	-0.0001628	-0.016	-0.01
-9.72e-05	1.34111e-08	0.004	-0.0001624	0.008	-0.004	-0.0001864	-0.02	0.004	-0.0003248	-0.016	2.38419e-08	-9.72e-05	-0.016	1.19209e-08	-8.12e-05	-0.016	1.19209e-08	-3.888e-05	0.048	0.004	-0.0003248	-0.024	0.004	-0.0003248	-0.016	0.004	-0.0001624	-0.016	-0.01
-9.7e-05	-0.008	0.004	-0.000162	0.008	-0.02	-0.000186	-0.012	-0.004	-0.000324	-0.008	-0.008	-9.7e-05	-0.016	1.19209e-08	-8.1e-05	-0.008	0.004	-3.88e-05	0.048	0.004	-0.000324	-0.008	-0.008	-0.000324	-0.016	1.19209e-08	-0.000162	-0.016	-0.006
-9.68e-05	1.34111e-08	0.004	-0.0001616	-0.016	-0.004	-0.0001856	-0.012	-0.004	-0.0003232	5.96047e-09	-0.008	-9.68e-05	-0.008	1.19209e-08	-8.08e-05	1.34111e-08	1.19209e-08	-3.872e-05	0.04	0.002	-0.0003232	-0.016	1.19209e-08	-0.0003232	-0.008	-0.004	-0.0001616	-0.016	-0.006
-9.66e-05	1.34111e-08	1.19209e-08	-0.0001612	-0.024	-0.012	-0.0001852	-0.004	0.004	-0.0003224	-0.008	2.38419e-08	-9.66e-05	-0.008	1.19209e-08	-8.06e-05	-0.008	0.004	-3.864e-05	0.048	0.004	-0.0003224	-0.016	1.19209e-08	-0.0003224	-0.016	1.19209e-08	-0.0001612	-0.008	-0.01
-9.64e-05	-0.016	0.008	-0.0001608	-0.008	-0.004	-0.0001848	-0.012	0.004	-0.0003216	-0.016	0.008	-9.64e-05	-0.008	1.19209e-08	-8.04e-05	-0.016	-0.004	-3.856e-05	0.048	0.002	-0.0003216	-0.024	1.19209e-08	-0.0003216	-0.024	1.19209e-08	-0.0001608	-0.016	-0.006
-9.62e-05	-0.016	1.19209e-08	-0.0001604	-0.016	-0.004	-0.0001844	-0.004	0.004	-0.0003208	-0.016	-0.008	-9.62e-05	-0.008	1.19209e-08	-8.02e-05	-0.016	1.19209e-08	-3.848e-05	0.04	0.006	-0.0003208	-0.016	1.19209e-08	-0.0003208	-0.008	1.19209e-08	-0.0001604	-0.016	-0.006
-9.6e-05	1.34111e-08	0.004	-0.00016	-0.008	-0.004	-0.000184	0.004	-0.004	-0.00032	-0.016	-0.008	-9.6e-05	-0.008	-0.004	-8e-05	-0.008	1.19209e-08	-3.84e-05	0.048	0.002	-0.00032	-0.016	1.19209e-08	-0.00032	-0.008	0.004	-0.00016	-0.016	-0.01
-9.58e-05	-0.016	0.004	-0.0001596	0.008	-0.004	-0.0001836	-0.012	-0.004	-0.0003192	-0.008	2.38419e-08	-9.58e-05	1.34111e-08	1.19209e-08	-7.98e-05	-0.008	-0.004	-3.832e-05	0.048	0.006	-0.0003192	-0.008	1.19209e-08	-0.0003192	-0.008	1.19209e-08	-0.0001596	-0.016	-0.01
-9.56e-05	-0.008	0.004	-0.0001592	-2.08616e-08	-0.004	-0.0001832	-0.004	0.004	-0.0003184	-0.016	-0.016	-9.56e-05	1.34111e-08	1.19209e-08	-7.96e-05	-0.016	0.004	-3.824e-05	0.04	0.006	-0.0003184	-0.016	1.19209e-08	-0.0003184	-0.016	0.004	-0.0001592	-0.008	-0.006
-9.54e-05	-0.016	0.004	-0.0001588	-2.08616e-08	-0.012	-0.0001828	-0.012	-0.004	-0.0003176	-0.016	2.38419e-08	-9.54e-05	1.34111e-08	-0.008	-7.94e-05	-0.008	1.19209e-08	-3.816e-05	0.048	0.004	-0.0003176	-0.008	1.19209e-08	-0.0003176	-0.008	0.004	-0.0001588	-0.016	-0.01
-9.52e-05	-0.008	0.004	-0.0001584	-2.08616e-08	-0.012	-0.0001824	-0.012	0.004	-0.0003168	-0.016	-0.008	-9.52e-05	-0.008	1.19209e-08	-7.92e-05	-0.008	-0.004	-3.808e-05	0.056	0.004	-0.0003168	-0.008	1.19209e-08	-0.0003168	1.34111e-08	-0.004	-0.0001584	-0.016	-0.006
-9.5e-05	-0.008	0.004	-0.000158	-0.016	-0.004	-0.000182	-0.02	0.012	-0.000316	-0.016	2.38419e-08	-9.5e-05	-0.008	1.19209e-08	-7.9e-05	1.34111e-08	1.19209e-08	-3.8e-05	0.048	0.004	-0.000316	-0.008	1.19209e-08	-0.000316	-0.016	-0.004	-0.000158	-0.008	-0.01
-9.48e-05	1.34111e-08	0.008	-0.0001576	-0.016	-0.004	-0.0001816	-0.012	0.012	-0.0003152	-0.008	2.38419e-08	-9.48e-05	-0.016	1.19209e-08	-7.88e-05	-0.008	0.004	-3.792e-05	0.048	0.004	-0.0003152	-0.008	-0.004	-0.0003152	-0.008	-0.004	-0.0001576	-0.016	-0.006
-9.46e-05	-0.008	1.19209e-08	-0.0001572	-0.008	0.004	-0.0001812	-0.012	0.004	-0.0003144	-0.024	2.38419e-08	-9.46e-05	-0.016	0.004	-7.86e-05	-0.008	1.19209e-08	-3.784e-05	0.048	0.004	-0.0003144	-0.008	1.19209e-08	-0.0003144	-0.016	1.19209e-08	-0.0001572	-0.016	-0.006
-9.44e-05	-0.008	0.004	-0.0001568	-0.008	-0.012	-0.0001808	-0.012	0.004	-0.0003136	-0.008	2.38419e-08	-9.44e-05	-0.008	1.19209e-08	-7.84e-05	-0.008	-0.004	-3.776e-05	0.056	0.004	-0.0003136	-0.016	0.008	-0.0003136	-0.016	1.19209e-08	-0.0001568	-2.08616e-08	-0.01
-9.42e-05	-0.008	0.004	-0.0001564	-0.008	-0.012	-0.0001804	-0.02	-0.004	-0.0003128	-0.016	-0.008	-9.42e-05	-0.016	0.008	-7.82e-05	-0.016	-0.008	-3.768e-05	0.048	0.006	-0.0003128	-0.008	-0.004	-0.0003128	-0.008	-0.004	-0.0001564	-0.008	-0.006
-9.4e-05	-0.008	0.004	-0.000156	-0.008	-0.004	-0.00018	-0.004	-0.004	-0.000312	-0.008	2.38419e-08	-9.4e-05	-0.008	1.19209e-08	-7.8e-05	-0.016	1.19209e-08	-3.76e-05	0.056	0.004	-0.000312	-0.024	1.19209e-08	-0.000312	-0.008	-0.008	-0.000156	-0.016	-0.01
-9.38e-05	-0.024	1.19209e-08	-0.0001556	-0.008	0.004	-0.0001796	-0.004	-0.004	-0.0003112	-0.008	2.38419e-08	-9.38e-05	1.34111e-08	0.008	-7.78e-05	-0.008	-0.004	-3.752e-05	0.048	0.006	-0.0003112	1.34111e-08	-0.004	-0.0003112	-0.008	1.19209e-08	-0.0001556	-0.008	-0.014
-9.36e-05	-0.024	0.004	-0.0001552	-0.016	0.004	-0.0001792	-0.012	0.012	-0.0003104	5.96047e-09	0.008	-9.36e-05	-0.008	0.004	-7.76e-05	-0.008	1.19209e-08	-3.744e-05	0.048	0.002	-0.0003104	-0.024	1.19209e-08	-0.0003104	-0.016	1.19209e-08	-0.0001552	-0.024	-0.01
-9.34e-05	-0.016	0.004	-0.0001548	-0.024	0.004	-0.0001788	-0.004	0.004	-0.0003096	-0.008	0.008	-9.34e-05	1.34111e-08	0.004	-7.74e-05	0.008	1.19209e-08	-3.736e-05	0.048	0.004	-0.0003096	-0.024	0.004	-0.0003096	-0.016	1.19209e-08	-0.0001548	-0.016	-0.002
-9.32e-05	1.34111e-08	0.004	-0.0001544	-0.016	-0.004	-0.0001784	-0.004	0.004	-0.0003088	-0.008	2.38419e-08	-9.32e-05	-0.016	1.19209e-08	-7.72e-05	-0.008	-0.004	-3.728e-05	0.056	0.004	-0.0003088	-0.016	-0.004	-0.0003088	-0.008	1.19209e-08	-0.0001544	-0.008	-0.006
-9.3e-05	1.34111e-08	0.004	-0.000154	-2.08616e-08	-0.004	-0.000178	-0.004	-0.004	-0.000308	-0.016	-0.008	-9.3e-05	-0.016	1.19209e-08	-7.7e-05	-0.008	-0.004	-3.72e-05	0.056	0.006	-0.000308	-0.016	1.19209e-08	-0.000308	-0.016	1.19209e-08	-0.000154	-0.008	-0.01
-9.28e-05	-0.008	0.012	-0.0001536	-2.08616e-08	-0.004	-0.0001776	-0.02	-0.004	-0.0003072	-0.008	2.38419e-08	-9.28e-05	-0.008	0.004	-7.68e-05	1.34111e-08	-0.004	-3.712e-05	0.056	0.004	-0.0003072	-0.016	-0.004	-0.0003072	-0.016	1.19209e-08	-0.0001536	-0.016	-0.002
-9.26e-05	-0.016	0.004	-0.0001532	-0.008	-0.02	-0.0001772	-0.02	-0.004	-0.0003064	-0.008	0.008	-9.26e-05	-0.008	1.19209e-08	-7.66e-05	-0.016	1.19209e-08	-3.704e-05	0.048	0.004	-0.0003064	-0.024	1.19209e-08	-0.0003064	-0.016	1.19209e-08	-0.0001532	-0.016	-0.006
-9.24e-05	1.34111e-08	0.004	-0.0001528	-0.016	-0.004	-0.0001768	0.004	-0.012	-0.0003056	-0.008	-0.008	-9.24e-05	-0.008	1.19209e-08	-7.64e-05	-0.016	1.19209e-08	-3.696e-05	0.04	0.006	-0.0003056	-0.008	-0.004	-0.0003056	-0.008	1.19209e-08	-0.0001528	-0.024	-0.006
-9.22e-05	-0.008	1.19209e-08	-0.0001524	-2.08616e-08	-0.004	-0.0001764	-0.012	-0.004	-0.0003048	-0.008	0.008	-9.22e-05	-0.016	0.004	-7.62e-05	-0.016	0.004	-3.688e-05	0.056	0.004	-0.0003048	-0.016	1.19209e-08	-0.0003048	-0.016	0.004	-0.0001524	-0.016	-0.006
-9.2e-05	-0.008	0.004	-0.000152	-2.08616e-08	-0.004	-0.000176	-0.004	0.004	-0.000304	-0.008	2.38419e-08	-9.2e-05	-0.008	1.19209e-08	-7.6e-05	-0.008	-0.004	-3.68e-05	0.056	0.004	-0.000304	-0.008	-0.004	-0.000304	-0.008	0.004	-0.000152	-0.024	-0.01
-9.18e-05	1.34111e-08	1.19209e-08	-0.0001516	-0.008	-0.004	-0.0001756	-0.012	0.004	-0.0003032	-0.016	0.008	-9.18e-05	-0.008	1.19209e-08	-7.58e-05	1.34111e-08	1.19209e-08	-3.672e-05	0.048	0.006	-0.0003032	-0.008	-0.004	-0.0003032	-0.016	1.19209e-08	-0.0001516	-2.08616e-08	-0.006
-9.16e-05	1.34111e-08	0.008	-0.0001512	-2.08616e-08	-0.012	-0.0001752	-0.012	0.012	-0.0003024	-0.008	2.38419e-08	-9.16e-05	-0.016	1.19209e-08	-7.56e-05	0.008	-0.008	-3.664e-05	0.04	0.008	-0.0003024	-0.016	1.19209e-08	-0.0003024	1.34111e-08	1.19209e-08	-0.0001512	-2.08616e-08	-0.002
-9.14e-05	-0.008	1.19209e-08	-0.0001508	-0.008	-0.004	-0.0001748	-0.02	0.004	-0.0003016	-0.016	2.38419e-08	-9.14e-05	-0.008	0.008	-7.54e-05	-0.008	-0.008	-3.656e-05	0.048	0.006	-0.0003016	-0.008	1.19209e-08	-0.0003016	-0.008	0.004	-0.0001508	-0.008	-0.01
-9.12e-05	1.34111e-08	1.19209e-08	-0.0001504	-2.08616e-08	-0.004	-0.0001744	-0.004	0.004	-0.0003008	-0.008	2.38419e-08	-9.12e-05	-0.008	1.19209e-08	-7.52e-05	-0.008	1.19209e-08	-3.648e-05	0.04	0.004	-0.0003008	-0.008	-0.004	-0.0003008	-0.008	-0.004	-0.0001504	-0.008	-0.014
-9.1e-05	-0.008	0.004	-0.00015	-0.008	-0.012	-0.000174	-0.004	0.004	-0.0003	-0.016	2.38419e-08	-9.1e-05	-0.008	1.19209e-08	-7.5e-05	-0.008	1.19209e-08	-3.64e-05	0.048	0.006	-0.0003	-0.016	1.19209e-08	-0.0003	-0.016	1.19209e-08	-0.00015	-0.016	-0.01
-9.08e-05	1.34111e-08	0.004	-0.0001496	-0.008	-0.012	-0.0001736	-0.02	-0.004	-0.0002992	-0.016	2.38419e-08	-9.08e-05	-0.008	1.19209e-08	-7.48e-05	-0.008	1.19209e-08	-3.632e-05	0.048	0.004	-0.0002992	-0.016	1.19209e-08	-0.0002992	-0.016	1.19209e-08	-0.0001496	-0.016	-0.01
-9.06e-05	-0.008	0.004	-0.0001492	-0.008	-0.004	-0.0001732	-0.004	0.004	-0.0002984	-0.008	2.38419e-08	-9.06e-05	-0.008	1.19209e-08	-7.46e-05	0.008	1.19209e-08	-3.624e-05	0.048	0.004	-0.0002984	-0.016	0.004	-0.0002984	-0.016	1.19209e-08	-0.0001492	-0.016	-0.006
-9.04e-05	-0.016	1.19209e-08	-0.0001488	-2.08616e-08	-0.004	-0.0001728	-0.02	-0.004	-0.0002976	-0.008	-0.008	-9.04e-05	-0.016	0.004	-7.44e-05	1.34111e-08	1.19209e-08	-3.616e-05	0.048	0.002	-0.0002976	-0.008	1.19209e-08	-0.0002976	-0.016	1.19209e-08	-0.0001488	-0.008	-0.006
-9.02e-05	-0.008	0.004	-0.0001484	-0.008	-0.004	-0.0001724	-0.004	0.004	-0.0002968	-0.008	2.38419e-08	-9.02e-05	1.34111e-08	1.19209e-08	-7.42e-05	1.34111e-08	1.19209e-08	-3.608e-05	0.04	0.004	-0.0002968	-0.008	1.19209e-08	-0.0002968	-0.016	1.19209e-08	-0.0001484	-0.008	-0.01
-9e-05	-0.008	1.19209e-08	-0.000148	-0.008	-0.004	-0.000172	-0.004	-0.004	-0.000296	5.96047e-09	2.38419e-08	-9e-05	-0.008	-0.004	-7.4e-05	1.34111e-08	0.004	-3.6e-05	0.048	0.004	-0.000296	-0.032	1.19209e-08	-0.000296	1.34111e-08	0.004	-0.000148	-0.016	-0.014
-8.98e-05	1.34111e-08	0.004	-0.0001476	-0.016	-0.004	-0.0001716	-0.004	-0.004	-0.0002952	-0.016	2.38419e-08	-8.98e-05	-0.008	1.19209e-08	-7.38e-05	-0.008	1.19209e-08	-3.592e-05	0.048	0.006	-0.0002952	-0.016	1.19209e-08	-0.0002952	-0.008	1.19209e-08	-0.0001476	-0.016	-0.014
-8.96e-05	1.34111e-08	0.004	-0.0001472	-0.008	-0.012	-0.0001712	-0.004	0.02	-0.0002944	5.96047e-09	2.38419e-08	-8.96e-05	-0.008	1.19209e-08	-7.36e-05	-0.008	-0.004	-3.584e-05	0.056	0.004	-0.0002944	-0.016	0.004	-0.0002944	-0.016	1.19209e-08	-0.0001472	-0.016	-0.006
-8.94e-05	1.34111e-08	1.19209e-08	-0.0001468	-0.008	-0.012	-0.0001708	-0.004	-0.004	-0.0002936	-0.016	2.38419e-08	-8.94e-05	-0.008	1.19209e-08	-7.34e-05	-0.016	-0.004	-3.576e-05	0.04	0.006	-0.0002936	-0.024	-0.004	-0.0002936	-0.008	1.19209e-08	-0.0001468	-0.016	-0.01
-8.92e-05	-0.016	0.004	-0.0001464	-2.08616e-08	-0.012	-0.0001704	-0.004	0.004	-0.0002928	5.96047e-09	2.38419e-08	-8.92e-05	-0.016	0.004	-7.32e-05	-0.008	1.19209e-08	-3.568e-05	0.048	0.004	-0.0002928	-0.008	0.008	-0.0002928	-0.008	1.19209e-08	-0.0001464	-0.016	-0.006
-8.9e-05	1.34111e-08	0.004	-0.000146	-2.08616e-08	-0.004	-0.00017	-0.012	-0.004	-0.000292	-0.016	0.008	-8.9e-05	-0.008	1.19209e-08	-7.3e-05	1.34111e-08	-0.004	-3.56e-05	0.048	0.002	-0.000292	-0.016	0.004	-0.000292	-0.016	1.19209e-08	-0.000146	-0.008	-0.01
-8.88e-05	-0.008	0.004	-0.0001456	-0.008	-0.012	-0.0001696	-0.012	-0.004	-0.0002912	-0.008	2.38419e-08	-8.88e-05	-0.008	-0.004	-7.28e-05	-0.008	-0.008	-3.552e-05	0.04	0.006	-0.0002912	-0.016	-0.004	-0.0002912	-0.008	-0.004	-0.0001456	-0.008	-0.006
-8.86e-05	-0.008	0.008	-0.0001452	-0.008	-0.004	-0.0001692	-0.012	0.004	-0.0002904	-0.008	-0.008	-8.86e-05	-0.016	1.19209e-08	-7.26e-05	-0.008	1.19209e-08	-3.544e-05	0.048	0.006	-0.0002904	-0.016	1.19209e-08	-0.0002904	-0.016	1.19209e-08	-0.0001452	-0.008	-0.01
-8.84e-05	-0.008	0.008	-0.0001448	-0.008	-0.004	-0.0001688	-0.004	-0.004	-0.0002896	-0.016	2.38419e-08	-8.84e-05	-0.008	1.19209e-08	-7.24e-05	-0.008	-0.004	-3.536e-05	0.048	0.004	-0.0002896	-0.016	1.19209e-08	-0.0002896	-0.008	-0.004	-0.0001448	-0.016	-0.01
-8.82e-05	-0.008	0.008	-0.0001444	-0.008	-0.02	-0.0001684	-0.004	-0.004	-0.0002888	5.96047e-09	2.38419e-08	-8.82e-05	-0.016	0.004	-7.22e-05	-0.024	1.19209e-08	-3.528e-05	0.04	0.004	-0.0002888	-0.008	1.19209e-08	-0.0002888	-0.008	1.19209e-08	-0.0001444	-0.024	-0.014
-8.8e-05	-0.008	0.004	-0.000144	-0.008	-0.012	-0.000168	-0.004	0.004	-0.000288	-0.008	2.38419e-08	-8.8e-05	-0.008	1.19209e-08	-7.2e-05	-0.008	1.19209e-08	-3.52e-05	0.048	0.004	-0.000288	1.34111e-08	-0.004	-0.000288	-0.008	1.19209e-08	-0.000144	-0.024	-0.006
-8.78e-05	-0.016	1.19209e-08	-0.0001436	-2.08616e-08	-0.004	-0.0001676	0.004	0.004	-0.0002872	5.96047e-09	2.38419e-08	-8.78e-05	-0.008	1.19209e-08	-7.18e-05	-0.008	-0.004	-3.512e-05	0.04	0.002	-0.0002872	-0.016	-0.004	-0.0002872	1.34111e-08	-0.004	-0.0001436	-0.016	-0.006
-8.76e-05	-0.008	0.004	-0.0001432	-0.008	-0.004	-0.0001672	-0.004	0.004	-0.0002864	5.96047e-09	2.38419e-08	-8.76e-05	-0.016	0.004	-7.16e-05	-0.016	-0.008	-3.504e-05	0.048	0.004	-0.0002864	-0.016	1.19209e-08	-0.0002864	-0.016	1.19209e-08	-0.0001432	-0.024	-0.006
-8.74e-05	-0.016	0.004	-0.0001428	-0.008	-0.004	-0.0001668	-0.02	0.004	-0.0002856	-0.008	2.38419e-08	-8.74e-05	-0.008	-0.004	-7.14e-05	-0.008	0.004	-3.496e-05	0.048	0.002	-0.0002856	-0.016	-0.004	-0.0002856	-0.008	1.19209e-08	-0.0001428	-0.008	-0.014
-8.72e-05	-0.008	1.19209e-08	-0.0001424	-2.08616e-08	-0.004	-0.0001664	-0.012	0.004	-0.0002848	-0.024	2.38419e-08	-8.72e-05	-0.008	0.004	-7.12e-05	-0.008	1.19209e-08	-3.488e-05	0.056	0.004	-0.0002848	-0.024	-0.004	-0.0002848	-0.008	-0.004	-0.0001424	-0.024	-0.006
-8.7e-05	1.34111e-08	0.004	-0.000142	-0.008	-0.004	-0.000166	-0.004	0.004	-0.000284	-0.008	2.38419e-08	-8.7e-05	-0.008	-0.004	-7.1e-05	1.34111e-08	1.19209e-08	-3.48e-05	0.048	0.004	-0.000284	-0.016	1.19209e-08	-0.000284	-0.016	-0.004	-0.000142	-0.016	-0.014
-8.68e-05	-0.008	1.19209e-08	-0.0001416	-0.008	-0.02	-0.0001656	-0.004	0.012	-0.0002832	-0.016	2.38419e-08	-8.68e-05	-0.016	1.19209e-08	-7.08e-05	-0.008	1.19209e-08	-3.472e-05	0.056	0.004	-0.0002832	-0.016	1.19209e-08	-0.0002832	-0.016	-0.004	-0.0001416	-0.016	-0.006
-8.66e-05	-0.008	0.008	-0.0001412	-0.008	-0.004	-0.0001652	-0.012	-0.004	-0.0002824	-0.016	2.38419e-08	-8.66e-05	-0.016	1.19209e-08	-7.06e-05	-0.008	1.19209e-08	-3.464e-05	0.048	0.002	-0.0002824	-0.016	1.19209e-08	-0.0002824	-0.008	-0.004	-0.0001412	-0.024	-0.01
-8.64e-05	-0.008	0.004	-0.0001408	-0.016	-0.004	-0.0001648	-0.004	-0.004	-0.0002816	-0.016	2.38419e-08	-8.64e-05	1.34111e-08	1.19209e-08	-7.04e-05	-0.008	1.19209e-08	-3.456e-05	0.048	0.006	-0.0002816	1.34111e-08	1.19209e-08	-0.0002816	-0.016	1.19209e-08	-0.0001408	-0.008	-0.006
-8.62e-05	-0.008	1.19209e-08	-0.0001404	-0.008	-0.004	-0.0001644	-0.02	-0.004	-0.0002808	-0.008	2.38419e-08	-8.62e-05	-0.008	1.19209e-08	-7.02e-05	-0.008	1.19209e-08	-3.448e-05	0.04	0.002	-0.0002808	-0.008	1.19209e-08	-0.0002808	-0.016	1.19209e-08	-0.0001404	-0.016	-0.006
-8.6e-05	1.34111e-08	0.012	-0.00014	0.008	-0.004	-0.000164	0.004	-0.004	-0.00028	-0.008	2.38419e-08	-8.6e-05	-0.008	1.19209e-08	-7e-05	-0.008	-0.008	-3.44e-05	0.056	0.006	-0.00028	-0.016	1.19209e-08	-0.00028	-0.016	1.19209e-08	-0.00014	-0.016	-0.006
-8.58e-05	-0.008	1.19209e-08	-0.0001396	-2.08616e-08	-0.012	-0.0001636	-0.004	-0.004	-0.0002792	-0.008	2.38419e-08	-8.58e-05	-0.008	1.19209e-08	-6.98e-05	-0.016	0.004	-3.432e-05	0.056	0.002	-0.0002792	-0.008	-0.004	-0.0002792	-0.008	0.004	-0.0001396	-0.016	-0.006
-8.56e-05	-0.016	0.004	-0.0001392	-2.08616e-08	-0.012	-0.0001632	-0.012	0.004	-0.0002784	-0.008	-0.008	-8.56e-05	-0.008	0.004	-6.96e-05	-0.008	1.19209e-08	-3.424e-05	0.056	0.004	-0.0002784	-0.016	1.19209e-08	-0.0002784	1.34111e-08	1.19209e-08	-0.0001392	-0.016	-0.01
-8.54e-05	1.34111e-08	1.19209e-08	-0.0001388	-0.008	-0.004	-0.0001628	-0.004	0.004	-0.0002776	-0.008	2.38419e-08	-8.54e-05	1.34111e-08	0.004	-6.94e-05	-0.024	1.19209e-08	-3.416e-05	0.048	0.006	-0.0002776	-0.008	1.19209e-08	-0.0002776	-0.008	1.19209e-08	-0.0001388	-0.016	-0.006
-8.52e-05	-0.016	1.19209e-08	-0.0001384	-0.016	-0.004	-0.0001624	-0.012	0.004	-0.0002768	-0.016	0.008	-8.52e-05	-0.016	-0.004	-6.92e-05	-0.016	-0.004	-3.408e-05	0.048	0.002	-0.0002768	-0.008	1.19209e-08	-0.0002768	-0.016	-0.004	-0.0001384	-0.016	-0.014
-8.5e-05	-0.008	0.008	-0.000138	-0.016	0.004	-0.000162	-0.012	-0.004	-0.000276	5.96047e-09	0.008	-8.5e-05	-0.016	0.004	-6.9e-05	-0.008	1.19209e-08	-3.4e-05	0.048	0.006	-0.000276	1.34111e-08	1.19209e-08	-0.000276	1.34111e-08	-0.004	-0.000138	-0.008	-0.006
-8.48e-05	-0.016	1.19209e-08	-0.0001376	-0.008	-0.012	-0.0001616	-0.012	0.004	-0.0002752	-0.008	2.38419e-08	-8.48e-05	1.34111e-08	0.004	-6.88e-05	-0.008	1.19209e-08	-3.392e-05	0.048	0.004	-0.0002752	-0.008	0.004	-0.0002752	-0.008	0.004	-0.0001376	-0.016	-0.006
-8.46e-05	1.34111e-08	0.004	-0.0001372	-0.008	-0.012	-0.0001612	-0.012	0.004	-0.0002744	-0.016	2.38419e-08	-8.46e-05	-0.008	0.008	-6.86e-05	-0.008	1.19209e-08	-3.384e-05	0.056	0.004	-0.0002744	-0.008	1.19209e-08	-0.0002744	-0.008	-0.004	-0.0001372	-0.008	0.002
-8.44e-05	-0.016	0.004	-0.0001368	0.008	-0.012	-0.0001608	-0.012	0.004	-0.0002736	-0.008	-0.008	-8.44e-05	-0.008	0.004	-6.84e-05	-0.008	-0.008	-3.376e-05	0.048	0.008	-0.0002736	-0.008	1.19209e-08	-0.0002736	-0.016	-0.004	-0.0001368	-0.008	-0.002
-8.42e-05	-0.008	1.19209e-08	-0.0001364	0.008	-0.004	-0.0001604	-0.012	0.004	-0.0002728	-0.016	2.38419e-08	-8.42e-05	-0.008	1.19209e-08	-6.82e-05	1.34111e-08	1.19209e-08	-3.368e-05	0.056	0.004	-0.0002728	-0.024	1.19209e-08	-0.0002728	-0.008	1.19209e-08	-0.0001364	-0.008	-0.014
-8.4e-05	-0.008	0.004	-0.000136	-2.08616e-08	-0.012	-0.00016	-0.004	-0.004	-0.000272	-0.008	2.38419e-08	-8.4e-05	-0.016	1.19209e-08	-6.8e-05	-0.008	-0.004	-3.36e-05	0.056	0.004	-0.000272	1.34111e-08	-0.004	-0.000272	-0.008	1.19209e-08	-0.000136	-0.008	-0.014
-8.38e-05	-0.008	0.004	-0.0001356	-0.008	-0.012	-0.0001596	-0.012	-0.004	-0.0002712	-0.016	2.38419e-08	-8.38e-05	-0.016	1.19209e-08	-6.78e-05	-0.008	-0.004	-3.352e-05	0.048	0.002	-0.0002712	-0.024	1.19209e-08	-0.0002712	-0.016	-0.008	-0.0001356	-0.016	-0.01
-8.36e-05	-0.008	1.19209e-08	-0.0001352	-0.016	-0.004	-0.0001592	-0.012	0.004	-0.0002704	-0.016	2.38419e-08	-8.36e-05	1.34111e-08	-0.004	-6.76e-05	1.34111e-08	1.19209e-08	-3.344e-05	0.048	0.004	-0.0002704	-0.016	1.19209e-08	-0.0002704	-0.016	1.19209e-08	-0.0001352	-0.024	-0.002
-8.34e-05	-0.016	1.19209e-08	-0.0001348	-0.008	0.004	-0.0001588	-0.02	0.004	-0.0002696	-0.008	-0.008	-8.34e-05	-0.008	1.19209e-08	-6.74e-05	-0.016	1.19209e-08	-3.336e-05	0.04	0.002	-0.0002696	1.34111e-08	1.19209e-08	-0.0002696	-0.008	0.004	-0.0001348	-0.008	-0.006
-8.32e-05	1.34111e-08	1.19209e-08	-0.0001344	-2.08616e-08	-0.02	-0.0001584	-0.012	0.004	-0.0002688	-0.008	2.38419e-08	-8.32e-05	-0.016	1.19209e-08	-6.72e-05	-0.016	1.19209e-08	-3.328e-05	0.056	0.002	-0.0002688	-0.024	-0.004	-0.0002688	-0.008	0.004	-0.0001344	-0.008	-0.006
-8.3e-05	-0.008	0.004	-0.000134	-0.008	-0.012	-0.000158	-0.004	-0.004	-0.000268	-0.016	0.008	-8.3e-05	-0.008	-0.004	-6.7e-05	-0.008	1.19209e-08	-3.32e-05	0.048	0.004	-0.000268	-0.024	1.19209e-08	-0.000268	-0.016	1.19209e-08	-0.000134	-0.008	-0.01
-8.28e-05	-0.008	0.004	-0.0001336	-0.008	-0.004	-0.0001576	-0.004	-0.004	-0.0002672	-0.016	2.38419e-08	-8.28e-05	-0.008	-0.004	-6.68e-05	-0.016	1.19209e-08	-3.312e-05	0.056	0.004	-0.0002672	-0.016	0.004	-0.0002672	-0.008	-0.004	-0.0001336	-0.008	-0.01
-8.26e-05	-0.016	1.19209e-08	-0.0001332	-0.016	0.004	-0.0001572	-0.012	0.012	-0.0002664	-0.008	2.38419e-08	-8.26e-05	1.34111e-08	1.19209e-08	-6.66e-05	-0.008	1.19209e-08	-3.304e-05	0.056	0.002	-0.0002664	-0.016	-0.008	-0.0002664	-0.008	1.19209e-08	-0.0001332	-0.008	-0.01
-8.24e-05	-0.016	0.008	-0.0001328	-0.016	-0.004	-0.0001568	-0.012	-0.004	-0.0002656	-0.024	2.38419e-08	-8.24e-05	-0.008	-0.004	-6.64e-05	-0.016	1.19209e-08	-3.296e-05	0.048	0.004	-0.0002656	-0.024	1.19209e-08	-0.0002656	-0.008	-0.004	-0.0001328	-0.024	-0.01
-8.22e-05	-0.016	0.004	-0.0001324	-0.016	-0.004	-0.0001564	-0.012	-0.004	-0.0002648	-0.008	-0.016	-8.22e-05	-0.008	1.19209e-08	-6.62e-05	-0.008	-0.004	-3.288e-05	0.056	0.004	-0.0002648	-0.008	0.004	-0.0002648	-0.016	1.19209e-08	-0.0001324	-0.008	-0.014
-8.2e-05	-0.008	0.008	-0.000132	-2.08616e-08	0.004	-0.000156	-0.012	0.004	-0.000264	-0.008	2.38419e-08	-8.2e-05	-0.008	1.19209e-08	-6.6e-05	-0.008	1.19209e-08	-3.28e-05	0.056	0.006	-0.000264	-0.016	0.004	-0.000264	1.34111e-08	1.19209e-08	-0.000132	-0.008	-0.006
-8.18e-05	-0.008	0.004	-0.0001316	-0.008	-0.004	-0.0001556	-0.004	0.004	-0.0002632	-0.016	2.38419e-08	-8.18e-05	-0.016	1.19209e-08	-6.58e-05	1.34111e-08	-0.004	-3.272e-05	0.056	0.004	-0.0002632	-0.016	1.19209e-08	-0.0002632	-0.008	1.19209e-08	-0.0001316	-0.016	0.002
-8.16e-05	0.008	0.004	-0.0001312	-2.08616e-08	-0.004	-0.0001552	-0.004	-0.004	-0.0002624	-0.016	-0.008	-8.16e-05	-0.008	-0.004	-6.56e-05	1.34111e-08	-0.004	-3.264e-05	0.048	0.004	-0.0002624	-0.008	1.19209e-08	-0.0002624	-0.008	1.19209e-08	-0.0001312	-0.016	-0.006
-8.14e-05	-0.008	0.008	-0.0001308	0.008	-0.004	-0.0001548	-0.012	0.004	-0.0002616	-0.008	2.38419e-08	-8.14e-05	-0.008	-0.004	-6.54e-05	-0.016	1.19209e-08	-3.256e-05	0.04	0.004	-0.0002616	-0.024	0.008	-0.0002616	-0.008	1.19209e-08	-0.0001308	-0.008	-0.006
-8.12e-05	-0.008	0.012	-0.0001304	-2.08616e-08	0.004	-0.0001544	-0.004	-0.004	-0.0002608	5.96047e-09	-0.008	-8.12e-05	-0.008	1.19209e-08	-6.52e-05	-0.008	1.19209e-08	-3.248e-05	0.048	0.002	-0.0002608	-0.016	-0.004	-0.0002608	-0.016	1.19209e-08	-0.0001304	-0.016	-0.006
-8.1e-05	-0.016	0.004	-0.00013	-0.008	-0.004	-0.000154	-0.02	0.004	-0.00026	-0.016	-0.008	-8.1e-05	-0.008	1.19209e-08	-6.5e-05	-0.008	1.19209e-08	-3.24e-05	0.056	0.002	-0.00026	-0.016	0.004	-0.00026	-0.016	0.004	-0.00013	-0.016	-0.014
-8.08e-05	-0.008	0.012	-0.0001296	-0.016	0.004	-0.0001536	-0.012	0.004	-0.0002592	5.96047e-09	2.38419e-08	-8.08e-05	-0.016	1.19209e-08	-6.48e-05	-0.008	1.19209e-08	-3.232e-05	0.048	0.004	-0.0002592	1.34111e-08	-0.004	-0.0002592	-0.008	1.19209e-08	-0.0001296	-0.016	-0.01
-8.06e-05	-0.008	0.004	-0.0001292	-0.008	-0.004	-0.0001532	-0.012	-0.004	-0.0002584	-0.008	-0.008	-8.06e-05	-0.008	0.004	-6.46e-05	1.34111e-08	-0.004	-3.224e-05	0.048	0.004	-0.0002584	-0.016	-0.004	-0.0002584	-0.016	0.004	-0.0001292	-0.008	-0.01
-8.04e-05	-0.016	0.004	-0.0001288	-2.08616e-08	-0.004	-0.0001528	-0.004	-0.004	-0.0002576	-0.016	2.38419e-08	-8.04e-05	-0.016	1.19209e-08	-6.44e-05	1.34111e-08	0.004	-3.216e-05	0.048	0.006	-0.0002576	-0.016	1.19209e-08	-0.0002576	-0.008	1.19209e-08	-0.0001288	-0.016	-0.006
-8.02e-05	-0.008	1.19209e-08	-0.0001284	-2.08616e-08	-0.004	-0.0001524	-0.004	-0.004	-0.0002568	-0.008	2.38419e-08	-8.02e-05	-0.008	1.19209e-08	-6.42e-05	1.34111e-08	-0.004	-3.208e-05	0.048	0.004	-0.0002568	-0.016	0.004	-0.0002568	-0.016	-0.008	-0.0001284	-0.008	-0.006
-8e-05	-0.008	0.008	-0.000128	-0.008	-0.004	-0.000152	-0.012	0.004	-0.000256	-0.008	-0.008	-8e-05	-0.008	0.008	-6.4e-05	1.34111e-08	0.004	-3.2e-05	0.056	0.004	-0.000256	-0.016	-0.004	-0.000256	-0.008	-0.004	-0.000128	-0.008	-0.014
-7.98e-05	-0.008	1.19209e-08	-0.0001276	-0.008	-0.004	-0.0001516	-0.02	0.004	-0.0002552	-0.008	-0.008	-7.98e-05	1.34111e-08	1.19209e-08	-6.38e-05	-0.008	-0.004	-3.192e-05	0.048	0.004	-0.0002552	1.34111e-08	-0.004	-0.0002552	-0.008	1.19209e-08	-0.0001276	-0.016	-0.01
-7.96e-05	1.34111e-08	1.19209e-08	-0.0001272	-0.016	-0.004	-0.0001512	-0.012	0.004	-0.0002544	-0.008	2.38419e-08	-7.96e-05	-0.008	1.19209e-08	-6.36e-05	-0.016	1.19209e-08	-3.184e-05	0.048	0.004	-0.0002544	-0.008	1.19209e-08	-0.0002544	-0.016	-0.004	-0.0001272	-0.016	-0.006
-7.94e-05	1.34111e-08	0.004	-0.0001268	-0.008	-0.004	-0.0001508	-0.012	0.004	-0.0002536	-0.024	2.38419e-08	-7.94e-05	-0.008	0.004	-6.34e-05	-0.008	-0.004	-3.176e-05	0.048	0.004	-0.0002536	-0.032	-0.004	-0.0002536	-0.008	-0.004	-0.0001268	-0.008	-0.01
-7.92e-05	-0.016	1.19209e-08	-0.0001264	-2.08616e-08	-0.004	-0.0001504	-0.012	-0.004	-0.0002528	-0.016	2.38419e-08	-7.92e-05	-0.008	1.19209e-08	-6.32e-05	-0.008	1.19209e-08	-3.168e-05	0.048	0.004	-0.0002528	-0.016	-0.004	-0.0002528	-0.008	1.19209e-08	-0.0001264	-0.016	-0.006
-7.9e-05	-0.024	0.008	-0.000126	0.008	0.004	-0.00015	0.004	0.012	-0.000252	-0.008	2.38419e-08	-7.9e-05	-0.008	1.19209e-08	-6.3e-05	-0.008	1.19209e-08	-3.16e-05	0.064	0.004	-0.000252	-0.008	1.19209e-08	-0.000252	-0.008	1.19209e-08	-0.000126	-2.08616e-08	-0.002
-7.88e-05	-0.008	1.19209e-08	-0.0001256	-0.008	-0.004	-0.0001496	-0.004	-0.004	-0.0002512	5.96047e-09	2.38419e-08	-7.88e-05	-0.016	0.004	-6.28e-05	-0.008	1.19209e-08	-3.152e-05	0.056	0.004	-0.0002512	-0.016	1.19209e-08	-0.0002512	1.34111e-08	1.19209e-08	-0.0001256	-0.008	-0.01
-7.86e-05	-0.008	0.004	-0.0001252	-0.008	-0.004	-0.0001492	-0.02	-0.012	-0.0002504	-0.008	2.38419e-08	-7.86e-05	-0.008	0.004	-6.26e-05	1.34111e-08	1.19209e-08	-3.144e-05	0.056	0.004	-0.0002504	-0.008	0.004	-0.0002504	-0.016	1.19209e-08	-0.0001252	-0.016	-0.006
-7.84e-05	-0.008	0.004	-0.0001248	-0.008	-0.004	-0.0001488	-0.012	0.004	-0.0002496	-0.016	2.38419e-08	-7.84e-05	1.34111e-08	0.004	-6.24e-05	1.34111e-08	1.19209e-08	-3.136e-05	0.048	0.006	-0.0002496	-0.008	1.19209e-08	-0.0002496	-0.016	1.19209e-08	-0.0001248	-0.008	-0.006
-7.82e-05	1.34111e-08	0.004	-0.0001244	-0.008	-0.012	-0.0001484	-0.02	-0.004	-0.0002488	5.96047e-09	2.38419e-08	-7.82e-05	-0.008	1.19209e-08	-6.22e-05	-0.008	-0.004	-3.128e-05	0.048	0.002	-0.0002488	-0.016	0.004	-0.0002488	-0.016	-0.004	-0.0001244	-0.024	-0.014
-7.8e-05	1.34111e-08	1.19209e-08	-0.000124	-2.08616e-08	-0.012	-0.000148	-0.012	0.012	-0.000248	-0.016	2.38419e-08	-7.8e-05	-0.016	1.19209e-08	-6.2e-05	-0.008	1.19209e-08	-3.12e-05	0.064	0.004	-0.000248	-0.008	0.004	-0.000248	1.34111e-08	-0.004	-0.000124	-0.024	-0.002
-7.78e-05	-0.008	1.19209e-08	-0.0001236	-2.08616e-08	-0.004	-0.0001476	-0.004	0.004	-0.0002472	-0.016	2.38419e-08	-7.78e-05	-0.008	1.19209e-08	-6.18e-05	0.008	1.19209e-08	-3.112e-05	0.056	0.006	-0.0002472	-0.016	1.19209e-08	-0.0002472	-0.016	1.19209e-08	-0.0001236	-0.008	-0.006
-7.76e-05	-0.008	1.19209e-08	-0.0001232	-0.008	-0.012	-0.0001472	-0.02	-0.004	-0.0002464	-0.008	2.38419e-08	-7.76e-05	-0.016	1.19209e-08	-6.16e-05	-0.016	-0.008	-3.104e-05	0.056	0.004	-0.0002464	-0.008	-0.004	-0.0002464	-0.016	1.19209e-08	-0.0001232	-0.016	-0.002
-7.74e-05	-0.008	-0.008	-0.0001228	-0.008	-0.012	-0.0001468	-0.012	0.004	-0.0002456	-0.016	-0.008	-7.74e-05	-0.016	-0.004	-6.14e-05	-0.008	1.19209e-08	-3.096e-05	0.064	0.006	-0.0002456	-0.016	0.004	-0.0002456	-0.008	0.004	-0.0001228	-0.008	-0.006
-7.72e-05	-0.024	0.004	-0.0001224	0.008	-0.004	-0.0001464	-0.004	-0.004	-0.0002448	-0.008	-0.016	-7.72e-05	-0.016	0.004	-6.12e-05	-0.016	-0.004	-3.088e-05	0.056	0.002	-0.0002448	-0.016	-0.004	-0.0002448	-0.016	1.19209e-08	-0.0001224	-0.016	-0.01
-7.7e-05	-0.016	0.008	-0.000122	-0.008	-0.004	-0.000146	-0.004	-0.004	-0.000244	-0.024	2.38419e-08	-7.7e-05	-0.016	1.19209e-08	-6.1e-05	-0.024	1.19209e-08	-3.08e-05	0.04	0.004	-0.000244	-0.008	0.004	-0.000244	-0.008	0.004	-0.000122	-0.016	-0.002
-7.68e-05	-0.016	0.004	-0.0001216	-0.008	-0.004	-0.0001456	-0.02	0.004	-0.0002432	-0.016	2.38419e-08	-7.68e-05	1.34111e-08	0.004	-6.08e-05	-0.016	-0.004	-3.072e-05	0.048	0.006	-0.0002432	-0.024	1.19209e-08	-0.0002432	-0.008	-0.004	-0.0001216	-0.016	-0.006
-7.66e-05	1.34111e-08	1.19209e-08	-0.0001212	-0.016	-0.004	-0.0001452	-0.012	0.004	-0.0002424	-0.016	2.38419e-08	-7.66e-05	-0.016	1.19209e-08	-6.06e-05	-0.016	-0.008	-3.064e-05	0.056	0.004	-0.0002424	1.34111e-08	1.19209e-08	-0.0002424	-0.016	1.19209e-08	-0.0001212	-0.024	-0.006
-7.64e-05	1.34111e-08	1.19209e-08	-0.0001208	-0.016	-0.004	-0.0001448	0.004	-0.004	-0.0002416	-0.016	-0.008	-7.64e-05	-0.008	1.19209e-08	-6.04e-05	-0.016	-0.004	-3.056e-05	0.048	0.002	-0.0002416	-0.016	1.19209e-08	-0.0002416	-0.016	1.19209e-08	-0.0001208	-0.024	-0.014
-7.62e-05	-0.008	0.008	-0.0001204	-0.008	-0.004	-0.0001444	-0.004	-0.004	-0.0002408	-0.016	-0.008	-7.62e-05	-0.008	1.19209e-08	-6.02e-05	-0.016	0.004	-3.048e-05	0.04	0.004	-0.0002408	-0.008	0.004	-0.0002408	-0.008	-0.004	-0.0001204	-0.016	-0.01
-7.6e-05	-0.008	1.19209e-08	-0.00012	0.008	-0.012	-0.000144	-0.004	0.004	-0.00024	-0.008	2.38419e-08	-7.6e-05	-0.008	-0.004	-6e-05	-0.008	0.008	-3.04e-05	0.048	0.004	-0.00024	-0.016	-0.004	-0.00024	-0.016	1.19209e-08	-0.00012	-0.024	-0.006
-7.58e-05	-0.008	0.004	-0.0001196	0.016	-0.012	-0.0001436	-0.012	0.012	-0.0002392	-0.016	0.008	-7.58e-05	-0.008	0.004	-5.98e-05	1.34111e-08	1.19209e-08	-3.032e-05	0.04	0.004	-0.0002392	-0.016	1.19209e-08	-0.0002392	-0.016	-0.004	-0.0001196	-0.016	-0.006
-7.56e-05	1.34111e-08	0.008	-0.0001192	-2.08616e-08	-0.012	-0.0001432	-0.004	-0.004	-0.0002384	-0.016	2.38419e-08	-7.56e-05	-0.008	1.19209e-08	-5.96e-05	1.34111e-08	1.19209e-08	-3.024e-05	0.04	0.004	-0.0002384	1.34111e-08	1.19209e-08	-0.0002384	-0.024	1.19209e-08	-0.0001192	-0.008	-0.01
-7.54e-05	-0.016	0.004	-0.0001188	-0.016	-0.012	-0.0001428	-0.012	-0.004	-0.0002376	-0.008	2.38419e-08	-7.54e-05	-0.016	0.004	-5.94e-05	-0.016	-0.004	-3.016e-05	0.04	0.004	-0.0002376	-0.024	1.19209e-08	-0.0002376	1.34111e-08	-0.004	-0.0001188	-0.024	-0.014
-7.52e-05	-0.008	0.004	-0.0001184	-2.08616e-08	-0.012	-0.0001424	-0.012	-0.004	-0.0002368	-0.016	-0.008	-7.52e-05	-0.008	0.004	-5.92e-05	-0.008	-0.004	-3.008e-05	0.048	0.006	-0.0002368	1.34111e-08	-0.004	-0.0002368	-0.008	1.19209e-08	-0.0001184	-0.016	-0.006
-7.5e-05	-0.016	0.004	-0.000118	-0.008	-0.004	-0.000142	-0.012	-0.004	-0.000236	-0.008	-0.008	-7.5e-05	1.34111e-08	1.19209e-08	-5.9e-05	-0.016	1.19209e-08	-3e-05	0.056	0.004	-0.000236	-0.008	0.004	-0.000236	-0.016	1.19209e-08	-0.000118	-0.032	-0.01
-7.48e-05	-0.008	1.19209e-08	-0.0001176	-0.008	-0.004	-0.0001416	-0.012	-0.004	-0.0002352	-0.008	2.38419e-08	-7.48e-05	-0.008	0.004	-5.88e-05	-0.016	1.19209e-08	-2.992e-05	0.056	0.004	-0.0002352	-0.024	1.19209e-08	-0.0002352	-0.008	-0.004	-0.0001176	-0.024	-0.01
-7.46e-05	-0.016	0.004	-0.0001172	-0.008	-0.012	-0.0001412	-0.004	-0.004	-0.0002344	-0.008	2.38419e-08	-7.46e-05	-0.016	1.19209e-08	-5.86e-05	-0.008	-0.004	-2.984e-05	0.056	0.004	-0.0002344	-0.016	-0.004	-0.0002344	-0.008	1.19209e-08	-0.0001172	-0.016	-0.002
-7.44e-05	-0.008	0.004	-0.0001168	-2.08616e-08	-0.012	-0.0001408	-0.012	0.004	-0.0002336	-0.008	2.38419e-08	-7.44e-05	-0.016	0.004	-5.84e-05	-0.008	1.19209e-08	-2.976e-05	0.04	0.004	-0.0002336	-0.016	0.004	-0.0002336	-0.008	1.19209e-08	-0.0001168	-0.008	-0.002
-7.42e-05	-0.016	0.004	-0.0001164	0.008	-0.012	-0.0001404	-0.012	-0.004	-0.0002328	-0.008	-0.008	-7.42e-05	1.34111e-08	1.19209e-08	-5.82e-05	-0.008	1.19209e-08	-2.968e-05	0.064	0.004	-0.0002328	-0.016	1.19209e-08	-0.0002328	-0.016	1.19209e-08	-0.0001164	-0.016	-0.014
-7.4e-05	-0.008	0.004	-0.000116	-0.008	-0.012	-0.00014	-0.012	0.004	-0.000232	-0.008	2.38419e-08	-7.4e-05	1.34111e-08	1.19209e-08	-5.8e-05	-0.008	-0.004	-2.96e-05	0.048	0.006	-0.000232	-0.008	-0.004	-0.000232	1.34111e-08	0.004	-0.000116	-0.008	-0.018
-7.38e-05	-0.016	1.19209e-08	-0.0001156	-0.016	0.004	-0.0001396	-0.004	-0.004	-0.0002312	-0.008	2.38419e-08	-7.38e-05	-0.008	0.004	-5.78e-05	1.34111e-08	-0.008	-2.952e-05	0.056	0.006	-0.0002312	-0.008	-0.004	-0.0002312	-0.024	1.19209e-08	-0.0001156	-0.008	-0.01
-7.36e-05	-0.008	0.008	-0.0001152	-0.008	-0.004	-0.0001392	-0.012	-0.004	-0.0002304	-0.016	0.008	-7.36e-05	-0.016	-0.004	-5.76e-05	0.008	1.19209e-08	-2.944e-05	0.056	0.004	-0.0002304	-0.016	-0.004	-0.0002304	-0.008	0.004	-0.0001152	-0.024	-0.006
-7.34e-05	-0.008	0.004	-0.0001148	-0.016	-0.004	-0.0001388	-0.004	-0.004	-0.0002296	5.96047e-09	-0.008	-7.34e-05	-0.008	1.19209e-08	-5.74e-05	-0.008	0.004	-2.936e-05	0.048	0.004	-0.0002296	-0.016	1.19209e-08	-0.0002296	-0.008	0.004	-0.0001148	-0.024	-0.006
-7.32e-05	-0.008	1.19209e-08	-0.0001144	-2.08616e-08	-0.012	-0.0001384	-0.004	0.004	-0.0002288	-0.024	2.38419e-08	-7.32e-05	-0.008	1.19209e-08	-5.72e-05	1.34111e-08	-0.004	-2.928e-05	0.056	0.006	-0.0002288	-0.024	1.19209e-08	-0.0002288	-0.016	1.19209e-08	-0.0001144	-0.024	-0.002
-7.3e-05	-0.016	0.004	-0.000114	0.008	-0.004	-0.000138	0.004	0.004	-0.000228	5.96047e-09	2.38419e-08	-7.3e-05	-0.008	1.19209e-08	-5.7e-05	-0.016	-0.004	-2.92e-05	0.056	0.004	-0.000228	-0.016	-0.004	-0.000228	-0.008	1.19209e-08	-0.000114	-0.016	-0.014
-7.28e-05	-0.008	0.004	-0.0001136	0.008	-0.012	-0.0001376	-0.012	-0.004	-0.0002272	-0.016	2.38419e-08	-7.28e-05	-0.016	1.19209e-08	-5.68e-05	-0.016	1.19209e-08	-2.912e-05	0.048	0.004	-0.0002272	-0.016	-0.008	-0.0002272	-0.008	-0.004	-0.0001136	-0.008	-0.018
-7.26e-05	-0.008	0.004	-0.0001132	-0.016	-0.012	-0.0001372	-0.012	-0.004	-0.0002264	-0.008	2.38419e-08	-7.26e-05	-0.008	0.004	-5.66e-05	1.34111e-08	1.19209e-08	-2.904e-05	0.04	0.004	-0.0002264	-0.024	-0.004	-0.0002264	-0.016	1.19209e-08	-0.0001132	-0.008	-0.01
-7.24e-05	-0.024	0.004	-0.0001128	-0.008	0.004	-0.0001368	-0.012	-0.004	-0.0002256	-0.008	2.38419e-08	-7.24e-05	-0.008	1.19209e-08	-5.64e-05	-0.008	1.19209e-08	-2.896e-05	0.048	0.004	-0.0002256	-0.008	1.19209e-08	-0.0002256	-0.016	1.19209e-08	-0.0001128	-0.016	-0.006
-7.22e-05	-0.016	-0.004	-0.0001124	-0.008	0.004	-0.0001364	-0.004	-0.012	-0.0002248	-0.008	2.38419e-08	-7.22e-05	-0.008	-0.008	-5.62e-05	-0.016	-0.004	-2.888e-05	0.04	0.002	-0.0002248	-0.016	0.008	-0.0002248	-0.016	-0.008	-0.0001124	-0.016	-0.006
-7.2e-05	-0.016	1.19209e-08	-0.000112	-2.08616e-08	-0.004	-0.000136	-0.004	0.004	-0.000224	-0.008	2.38419e-08	-7.2e-05	-0.008	1.19209e-08	-5.6e-05	-0.008	1.19209e-08	-2.88e-05	0.048	0.006	-0.000224	-0.016	1.19209e-08	-0.000224	-0.016	0.004	-0.000112	-0.024	-0.006
-7.18e-05	-0.008	0.004	-0.0001116	-2.08616e-08	0.004	-0.0001356	-0.004	-0.004	-0.0002232	-0.008	2.38419e-08	-7.18e-05	-0.008	1.19209e-08	-5.58e-05	-0.016	1.19209e-08	-2.872e-05	0.04	0.004	-0.0002232	-0.008	1.19209e-08	-0.0002232	-0.016	1.19209e-08	-0.0001116	-0.008	-0.006
-7.16e-05	-0.016	0.004	-0.0001112	-2.08616e-08	-0.012	-0.0001352	-0.012	0.004	-0.0002224	-0.008	2.38419e-08	-7.16e-05	-0.016	1.19209e-08	-5.56e-05	-0.008	1.19209e-08	-2.864e-05	0.048	0.006	-0.0002224	-0.016	-0.004	-0.0002224	-0.016	1.19209e-08	-0.0001112	-0.008	-0.01
-7.14e-05	-0.008	1.19209e-08	-0.0001108	-0.008	-0.004	-0.0001348	-0.028	0.004	-0.0002216	-0.016	-0.008	-7.14e-05	-0.008	1.19209e-08	-5.54e-05	1.34111e-08	1.19209e-08	-2.856e-05	0.056	0.002	-0.0002216	-0.016	1.19209e-08	-0.0002216	-0.016	-0.004	-0.0001108	-0.008	-0.01
-7.12e-05	1.34111e-08	1.19209e-08	-0.0001104	-0.008	-0.012	-0.0001344	-0.012	0.004	-0.0002208	-0.008	2.38419e-08	-7.12e-05	-0.008	0.008	-5.52e-05	-0.008	1.19209e-08	-2.848e-05	0.056	0.004	-0.0002208	-0.016	-0.004	-0.0002208	-0.016	0.008	-0.0001104	-0.008	-0.01
-7.1e-05	-0.016	0.004	-0.00011	-0.008	-0.004	-0.000134	-0.004	-0.012	-0.00022	5.96047e-09	0.008	-7.1e-05	-0.008	-0.008	-5.5e-05	-0.016	0.004	-2.84e-05	0.064	0.004	-0.00022	-0.016	1.19209e-08	-0.00022	1.34111e-08	1.19209e-08	-0.00011	-0.024	-0.014
-7.08e-05	-0.016	1.19209e-08	-0.0001096	-0.008	-0.004	-0.0001336	-0.02	-0.012	-0.0002192	-0.016	2.38419e-08	-7.08e-05	1.34111e-08	1.19209e-08	-5.48e-05	0.008	1.19209e-08	-2.832e-05	0.048	0.004	-0.0002192	1.34111e-08	-0.008	-0.0002192	-0.016	1.19209e-08	-0.0001096	-0.016	-0.006
-7.06e-05	-0.016	0.004	-0.0001092	-0.008	0.004	-0.0001332	-0.012	-0.004	-0.0002184	-0.008	-0.016	-7.06e-05	-0.008	0.004	-5.46e-05	-0.008	0.004	-2.824e-05	0.048	0.004	-0.0002184	-0.024	0.008	-0.0002184	-0.016	-0.004	-0.0001092	-0.008	-0.006
-7.04e-05	-0.016	0.004	-0.0001088	-0.016	-0.012	-0.0001328	-0.02	0.004	-0.0002176	-0.008	2.38419e-08	-7.04e-05	-0.008	1.19209e-08	-5.44e-05	-0.008	1.19209e-08	-2.816e-05	0.048	0.002	-0.0002176	-0.016	0.004	-0.0002176	-0.008	1.19209e-08	-0.0001088	-0.008	-0.006
-7.02e-05	-0.008	1.19209e-08	-0.0001084	-2.08616e-08	-0.02	-0.0001324	-0.02	-0.004	-0.0002168	-0.016	2.38419e-08	-7.02e-05	-0.016	-0.004	-5.42e-05	0.008	1.19209e-08	-2.808e-05	0.048	0.004	-0.0002168	-0.024	1.19209e-08	-0.0002168	-0.016	-0.004	-0.0001084	-0.008	-0.01
-7e-05	1.34111e-08	1.19209e-08	-0.000108	-2.08616e-08	-0.004	-0.000132	-0.02	-0.004	-0.000216	-0.016	0.008	-7e-05	-0.008	1.19209e-08	-5.4e-05	0.008	-0.004	-2.8e-05	0.048	0.004	-0.000216	-0.016	1.19209e-08	-0.000216	-0.024	1.19209e-08	-0.000108	-0.016	-0.006
-6.98e-05	1.34111e-08	-0.004	-0.0001076	-2.08616e-08	-0.004	-0.0001316	-0.02	0.004	-0.0002152	-0.008	2.38419e-08	-6.98e-05	-0.008	1.19209e-08	-5.38e-05	0.016	0.008	-2.792e-05	0.056	0.004	-0.0002152	-0.016	1.19209e-08	-0.0002152	1.34111e-08	1.19209e-08	-0.0001076	-0.008	-0.01
-6.96e-05	1.34111e-08	0.004	-0.0001072	-0.016	-0.004	-0.0001312	-0.012	-0.012	-0.0002144	-0.016	-0.008	-6.96e-05	-0.016	0.004	-5.36e-05	0.024	0.008	-2.784e-05	0.056	0.006	-0.0002144	-0.008	1.19209e-08	-0.0002144	-0.008	-0.004	-0.0001072	-0.016	-0.01
-6.94e-05	-0.008	-0.004	-0.0001068	-0.008	0.004	-0.0001308	-0.004	0.004	-0.0002136	-0.016	2.38419e-08	-6.94e-05	-0.016	1.19209e-08	-5.34e-05	0.024	1.19209e-08	-2.776e-05	0.048	0.004	-0.0002136	-0.016	1.19209e-08	-0.0002136	-0.016	1.19209e-08	-0.0001068	-0.016	-0.01
-6.92e-05	-0.008	1.19209e-08	-0.0001064	-2.08616e-08	0.004	-0.0001304	-0.02	-0.004	-0.0002128	-0.016	2.38419e-08	-6.92e-05	-0.016	1.19209e-08	-5.32e-05	0.024	1.19209e-08	-2.768e-05	0.048	0.004	-0.0002128	-0.008	-0.004	-0.0002128	-0.008	-0.004	-0.0001064	-0.008	-0.006
-6.9e-05	-0.008	0.004	-0.000106	-0.008	-0.004	-0.00013	-0.02	0.004	-0.000212	-0.016	2.38419e-08	-6.9e-05	-0.008	1.19209e-08	-5.3e-05	0.016	-0.004	-2.76e-05	0.064	0.002	-0.000212	-0.016	1.19209e-08	-0.000212	-0.016	1.19209e-08	-0.000106	-0.016	-0.006
-6.88e-05	-0.008	0.008	-0.0001056	-2.08616e-08	-0.004	-0.0001296	-0.02	0.004	-0.0002112	-0.008	2.38419e-08	-6.88e-05	-0.008	-0.004	-5.28e-05	0.024	1.19209e-08	-2.752e-05	0.048	0.006	-0.0002112	-0.008	0.004	-0.0002112	-0.008	-0.008	-0.0001056	-0.008	-0.006
-6.86e-05	-0.016	0.004	-0.0001052	-0.008	-0.012	-0.0001292	-0.004	-0.004	-0.0002104	-0.016	-0.016	-6.86e-05	-0.016	0.004	-5.26e-05	0.04	1.19209e-08	-2.744e-05	0.048	0.004	-0.0002104	-0.008	-0.004	-0.0002104	-0.008	-0.004	-0.0001052	-0.008	-0.006
-6.84e-05	-0.016	-0.004	-0.0001048	-0.008	-0.012	-0.0001288	-0.004	-0.004	-0.0002096	-0.008	-0.008	-6.84e-05	-0.016	1.19209e-08	-5.24e-05	0.016	-0.004	-2.736e-05	0.056	0.004	-0.0002096	-0.016	0.008	-0.0002096	-0.016	1.19209e-08	-0.0001048	-0.024	-0.014
-6.82e-05	-0.016	1.19209e-08	-0.0001044	0.008	-0.012	-0.0001284	-0.012	0.004	-0.0002088	-0.008	0.008	-6.82e-05	-0.016	1.19209e-08	-5.22e-05	0.032	1.19209e-08	-2.728e-05	0.048	0.004	-0.0002088	-0.016	1.19209e-08	-0.0002088	1.34111e-08	1.19209e-08	-0.0001044	-0.008	-0.01
-6.8e-05	-0.008	0.004	-0.000104	0.008	-0.004	-0.000128	-0.028	-0.004	-0.000208	-0.008	-0.008	-6.8e-05	-0.016	1.19209e-08	-5.2e-05	0.032	-0.004	-2.72e-05	0.048	0.004	-0.000208	-0.008	-0.004	-0.000208	-0.016	-0.004	-0.000104	-0.016	-0.014
-6.78e-05	-0.016	0.004	-0.0001036	-2.08616e-08	-0.004	-0.0001276	-0.02	-0.004	-0.0002072	-0.016	-0.008	-6.78e-05	-0.008	0.004	-5.18e-05	0.048	-0.004	-2.712e-05	0.048	0.004	-0.0002072	-0.008	1.19209e-08	-0.0002072	-0.008	1.19209e-08	-0.0001036	-0.016	-0.006
-6.76e-05	-0.016	0.004	-0.0001032	-2.08616e-08	-0.004	-0.0001272	0.004	-0.004	-0.0002064	-0.024	-0.008	-6.76e-05	-0.016	0.004	-5.16e-05	0.04	-0.012	-2.704e-05	0.048	0.006	-0.0002064	-0.008	-0.004	-0.0002064	-0.008	1.19209e-08	-0.0001032	-0.016	-0.01
-6.74e-05	-0.008	0.004	-0.0001028	-2.08616e-08	-0.004	-0.0001268	-0.004	-0.004	-0.0002056	-0.008	-0.008	-6.74e-05	-0.008	0.004	-5.14e-05	0.048	1.19209e-08	-2.696e-05	0.048	0.004	-0.0002056	-0.016	1.19209e-08	-0.0002056	-0.024	1.19209e-08	-0.0001028	-0.008	-0.01
-6.72e-05	-0.008	1.19209e-08	-0.0001024	-2.08616e-08	-0.004	-0.0001264	-0.028	0.004	-0.0002048	-0.008	2.38419e-08	-6.72e-05	-0.008	0.004	-5.12e-05	0.048	0.004	-2.688e-05	0.048	0.004	-0.0002048	-0.008	1.19209e-08	-0.0002048	1.34111e-08	1.19209e-08	-0.0001024	-0.016	-0.01
-6.7e-05	-0.008	0.004	-0.000102	-0.008	-0.012	-0.000126	-0.012	0.004	-0.000204	-0.008	2.38419e-08	-6.7e-05	-0.024	1.19209e-08	-5.1e-05	0.056	1.19209e-08	-2.68e-05	0.056	0.002	-0.000204	-0.016	-0.004	-0.000204	-0.024	1.19209e-08	-0.000102	-0.016	-0.006
-6.68e-05	-0.008	0.008	-0.0001016	-2.08616e-08	-0.012	-0.0001256	-0.004	0.012	-0.0002032	-0.008	2.38419e-08	-6.68e-05	-0.008	1.19209e-08	-5.08e-05	0.048	1.19209e-08	-2.672e-05	0.064	0.004	-0.0002032	-0.008	1.19209e-08	-0.0002032	-0.008	1.19209e-08	-0.0001016	-0.016	-0.006
-6.66e-05	-0.008	1.19209e-08	-0.0001012	-0.008	0.004	-0.0001252	0.004	0.004	-0.0002024	-0.016	-0.008	-6.66e-05	-0.008	0.004	-5.06e-05	0.056	1.19209e-08	-2.664e-05	0.056	0.004	-0.0002024	-0.008	-0.004	-0.0002024	-0.008	-0.004	-0.0001012	-0.016	-0.002
-6.64e-05	-0.008	1.19209e-08	-0.0001008	-0.008	0.004	-0.0001248	-0.012	-0.004	-0.0002016	-0.008	2.38419e-08	-6.64e-05	-0.024	-0.004	-5.04e-05	0.048	1.19209e-08	-2.656e-05	0.048	0.006	-0.0002016	-0.016	1.19209e-08	-0.0002016	-0.016	-0.008	-0.0001008	-0.024	-0.006
-6.62e-05	-0.016	0.008	-0.0001004	-0.016	-0.004	-0.0001244	-0.012	0.004	-0.0002008	-0.008	-0.008	-6.62e-05	-0.008	0.004	-5.02e-05	0.056	1.19209e-08	-2.648e-05	0.056	0.004	-0.0002008	-0.008	1.19209e-08	-0.0002008	-0.008	-0.004	-0.0001004	-0.008	-0.006
-6.6e-05	-0.008	1.19209e-08	-0.0001	-0.008	-0.012	-0.000124	-0.012	-0.004	-0.0002	-0.008	-0.008	-6.6e-05	-0.024	0.004	-5e-05	0.048	-0.004	-2.64e-05	0.048	0.004	-0.0002	-0.016	1.19209e-08	-0.0002	-0.016	1.19209e-08	-0.0001	-0.016	-0.006
-6.58e-05	-0.016	1.19209e-08	-9.96e-05	-2.08616e-08	-0.004	-0.0001236	-0.004	0.004	-0.0001992	-0.008	2.38419e-08	-6.58e-05	-0.016	1.19209e-08	-4.98e-05	0.04	0.004	-2.632e-05	0.048	0.004	-0.0001992	-0.024	1.19209e-08	-0.0001992	1.34111e-08	1.19209e-08	-9.96e-05	-0.016	-0.006
-6.56e-05	-0.008	0.004	-9.92e-05	0.008	-0.004	-0.0001232	-0.012	0.012	-0.0001984	-0.008	2.38419e-08	-6.56e-05	1.34111e-08	1.19209e-08	-4.96e-05	0.048	-0.004	-2.624e-05	0.056	0.002	-0.0001984	-0.024	1.19209e-08	-0.0001984	-0.016	1.19209e-08	-9.92e-05	-0.008	-0.01
-6.54e-05	-0.024	0.004	-9.88e-05	-0.016	-0.012	-0.0001228	0.004	0.004	-0.0001976	5.96047e-09	2.38419e-08	-6.54e-05	-0.016	1.19209e-08	-4.94e-05	0.048	-0.004	-2.616e-05	0.056	0.004	-0.0001976	1.34111e-08	1.19209e-08	-0.0001976	-0.008	1.19209e-08	-9.88e-05	-0.016	-0.006
-6.52e-05	-0.008	1.19209e-08	-9.84e-05	-0.024	-0.012	-0.0001224	-0.012	-0.004	-0.0001968	-0.008	2.38419e-08	-6.52e-05	-0.008	0.008	-4.92e-05	0.04	1.19209e-08	-2.608e-05	0.056	0.006	-0.0001968	-0.016	-0.004	-0.0001968	-0.016	-0.004	-9.84e-05	-0.016	-0.006
-6.5e-05	1.34111e-08	0.008	-9.8e-05	-0.008	-0.004	-0.000122	-0.02	-0.004	-0.000196	-0.008	2.38419e-08	-6.5e-05	-0.008	0.004	-4.9e-05	0.048	-0.004	-2.6e-05	0.048	0.004	-0.000196	-0.024	1.19209e-08	-0.000196	-0.016	1.19209e-08	-9.8e-05	-0.024	-0.01
-6.48e-05	-0.008	1.19209e-08	-9.76e-05	-2.08616e-08	-0.004	-0.0001216	-0.012	-0.004	-0.0001952	-0.008	2.38419e-08	-6.48e-05	-0.016	1.19209e-08	-4.88e-05	0.056	1.19209e-08	-2.592e-05	0.048	0.004	-0.0001952	-0.016	1.19209e-08	-0.0001952	-0.016	1.19209e-08	-9.76e-05	-0.008	-0.006
-6.46e-05	-0.008	0.004	-9.72e-05	-0.016	-0.012	-0.0001212	-0.004	0.004	-0.0001944	-0.008	2.38419e-08	-6.46e-05	-0.016	1.19209e-08	-4.86e-05	0.056	-0.004	-2.584e-05	0.048	0.002	-0.0001944	-0.024	-0.004	-0.0001944	-0.024	0.004	-9.72e-05	-0.008	-0.006
-6.44e-05	-0.008	1.19209e-08	-9.68e-05	-2.08616e-08	-0.004	-0.0001208	-0.004	-0.004	-0.0001936	-0.016	2.38419e-08	-6.44e-05	-0.008	1.19209e-08	-4.84e-05	0.056	-0.004	-2.576e-05	0.048	0.004	-0.0001936	-0.008	0.004	-0.0001936	-0.008	1.19209e-08	-9.68e-05	-0.016	0.002
-6.42e-05	-0.016	0.004	-9.64e-05	-2.08616e-08	-0.012	-0.0001204	-0.012	0.004	-0.0001928	-0.008	2.38419e-08	-6.42e-05	-0.008	1.19209e-08	-4.82e-05	0.056	-0.004	-2.568e-05	0.048	0.002	-0.0001928	1.34111e-08	1.19209e-08	-0.0001928	-0.016	1.19209e-08	-9.64e-05	-0.016	-0.006
-6.4e-05	-0.016	0.004	-9.6e-05	-0.008	-0.012	-0.00012	-0.004	-0.004	-0.000192	-0.016	-0.008	-6.4e-05	-0.008	0.004	-4.8e-05	0.048	1.19209e-08	-2.56e-05	0.048	0.004	-0.000192	-0.008	0.004	-0.000192	-0.008	-0.004	-9.6e-05	-0.016	-0.006
-6.38e-05	-0.008	1.19209e-08	-9.56e-05	-0.016	0.004	-0.0001196	-0.012	0.004	-0.0001912	-0.016	2.38419e-08	-6.38e-05	-0.008	-0.004	-4.78e-05	0.056	1.19209e-08	-2.552e-05	0.048	0.002	-0.0001912	-0.016	-0.004	-0.0001912	1.34111e-08	-0.004	-9.56e-05	-0.016	-0.014
-6.36e-05	-0.016	1.19209e-08	-9.52e-05	-0.016	-0.004	-0.0001192	-0.02	0.004	-0.0001904	-0.008	0.008	-6.36e-05	1.34111e-08	1.19209e-08	-4.76e-05	0.056	1.19209e-08	-2.544e-05	0.048	0.002	-0.0001904	1.34111e-08	1.19209e-08	-0.0001904	-0.016	-0.004	-9.52e-05	-0.016	-0.01
-6.34e-05	0.008	1.19209e-08	-9.48e-05	-0.008	-0.004	-0.0001188	-0.012	-0.004	-0.0001896	-0.016	-0.008	-6.34e-05	-0.016	1.19209e-08	-4.74e-05	0.048	-0.004	-2.536e-05	0.056	0.004	-0.0001896	-0.008	1.19209e-08	-0.0001896	-0.024	1.19209e-08	-9.48e-05	-0.016	-0.006
-6.32e-05	1.34111e-08	0.004	-9.44e-05	-2.08616e-08	-0.012	-0.0001184	-0.02	-0.004	-0.0001888	-0.008	2.38419e-08	-6.32e-05	-0.016	1.19209e-08	-4.72e-05	0.056	1.19209e-08	-2.528e-05	0.048	0.004	-0.0001888	-0.016	0.004	-0.0001888	-0.008	1.19209e-08	-9.44e-05	-0.008	-0.006
-6.3e-05	1.34111e-08	1.19209e-08	-9.4e-05	-0.008	-0.012	-0.000118	-0.012	0.004	-0.000188	-0.008	2.38419e-08	-6.3e-05	-0.016	-0.004	-4.7e-05	0.048	1.19209e-08	-2.52e-05	0.04	0.002	-0.000188	-0.016	1.19209e-08	-0.000188	-0.016	1.19209e-08	-9.4e-05	-0.008	-0.014
-6.28e-05	1.34111e-08	0.004	-9.36e-05	-0.008	-0.012	-0.0001176	-0.012	-0.004	-0.0001872	-0.008	2.38419e-08	-6.28e-05	-0.008	0.008	-4.68e-05	0.056	-0.004	-2.512e-05	0.048	0.004	-0.0001872	-0.024	-0.004	-0.0001872	1.34111e-08	0.004	-9.36e-05	-0.016	-0.01
-6.26e-05	0.008	0.004	-9.32e-05	-0.008	-0.004	-0.0001172	-0.004	-0.004	-0.0001864	-0.024	0.008	-6.26e-05	-0.016	1.19209e-08	-4.66e-05	0.048	0.004	-2.504e-05	0.048	0.004	-0.0001864	-0.016	1.19209e-08	-0.0001864	-0.016	-0.008	-9.32e-05	-0.024	-0.01
-6.24e-05	0.008	0.008	-9.28e-05	-0.016	-0.004	-0.0001168	-0.012	0.004	-0.0001856	-0.016	2.38419e-08	-6.24e-05	-0.008	1.19209e-08	-4.64e-05	0.056	1.19209e-08	-2.496e-05	0.056	0.004	-0.0001856	0.008	1.19209e-08	-0.0001856	1.34111e-08	1.19209e-08	-9.28e-05	-0.016	-0.006
-6.22e-05	0.016	0.004	-9.24e-05	-0.008	-0.004	-0.0001164	-0.012	-0.004	-0.0001848	-0.016	0.008	-6.22e-05	-0.016	0.004	-4.62e-05	0.056	0.004	-2.488e-05	0.048	0.004	-0.0001848	-0.016	1.19209e-08	-0.0001848	-0.016	1.19209e-08	-9.24e-05	-0.016	-0.006
-6.2e-05	0.016	1.19209e-08	-9.2e-05	-0.008	-0.004	-0.000116	-0.02	-0.004	-0.000184	-0.016	2.38419e-08	-6.2e-05	-0.016	1.19209e-08	-4.6e-05	0.056	1.19209e-08	-2.48e-05	0.048	0.004	-0.000184	-0.024	1.19209e-08	-0.000184	-0.008	0.004	-9.2e-05	-0.016	-0.006
-6.18e-05	0.008	0.008	-9.16e-05	-2.08616e-08	-0.004	-0.0001156	-0.02	0.004	-0.0001832	-0.008	2.38419e-08	-6.18e-05	-0.016	1.19209e-08	-4.58e-05	0.048	0.004	-2.472e-05	0.056	0.002	-0.0001832	-0.008	-0.004	-0.0001832	-0.008	1.19209e-08	-9.16e-05	-0.008	-0.002
-6.16e-05	0.024	0.004	-9.12e-05	0.008	-0.012	-0.0001152	-0.012	0.004	-0.0001824	-0.008	2.38419e-08	-6.16e-05	-0.008	1.19209e-08	-4.56e-05	0.048	1.19209e-08	-2.464e-05	0.048	0.004	-0.0001824	-0.016	1.19209e-08	-0.0001824	-0.008	0.004	-9.12e-05	-0.008	-0.006
-6.14e-05	0.024	1.19209e-08	-9.08e-05	-2.08616e-08	-0.004	-0.0001148	0.004	-0.004	-0.0001816	-0.016	2.38419e-08	-6.14e-05	-0.008	1.19209e-08	-4.54e-05	0.056	1.19209e-08	-2.456e-05	0.056	0.004	-0.0001816	-0.016	1.19209e-08	-0.0001816	-0.008	-0.004	-9.08e-05	-0.008	-0.01
-6.12e-05	0.032	1.19209e-08	-9.04e-05	-0.008	0.004	-0.0001144	-0.012	-0.004	-0.0001808	-0.008	2.38419e-08	-6.12e-05	-0.024	1.19209e-08	-4.52e-05	0.056	-0.004	-2.448e-05	0.048	0.006	-0.0001808	-0.008	-0.004	-0.0001808	-0.016	1.19209e-08	-9.04e-05	-0.016	-0.018
-6.1e-05	0.032	0.004	-9e-05	-0.008	0.004	-0.000114	-0.012	0.004	-0.00018	-0.016	2.38419e-08	-6.1e-05	-0.008	-0.004	-4.5e-05	0.072	1.19209e-08	-2.44e-05	0.056	0.004	-0.00018	-0.016	0.004	-0.00018	-0.008	1.19209e-08	-9e-05	-0.024	-0.01
-6.08e-05	0.04	0.004	-8.96e-05	-0.008	-0.012	-0.0001136	-0.012	-0.004	-0.0001792	-0.008	2.38419e-08	-6.08e-05	-0.008	1.19209e-08	-4.48e-05	0.04	-0.004	-2.432e-05	0.048	0.002	-0.0001792	-0.016	-0.004	-0.0001792	1.34111e-08	-0.004	-8.96e-05	-0.016	-0.002
-6.06e-05	0.04	1.19209e-08	-8.92e-05	-0.008	-0.012	-0.0001132	-0.004	0.004	-0.0001784	-0.016	2.38419e-08	-6.06e-05	-0.016	1.19209e-08	-4.46e-05	0.048	-0.004	-2.424e-05	0.048	0.004	-0.0001784	-0.016	1.19209e-08	-0.0001784	1.34111e-08	1.19209e-08	-8.92e-05	-0.016	-0.01
-6.04e-05	0.04	1.19209e-08	-8.88e-05	-0.008	-0.012	-0.0001128	-0.012	0.012	-0.0001776	-0.008	-0.008	-6.04e-05	-0.008	0.004	-4.44e-05	0.056	-0.004	-2.416e-05	0.04	0.002	-0.0001776	-0.024	1.19209e-08	-0.0001776	-0.016	0.004	-8.88e-05	-0.008	-0.002
-6.02e-05	0.048	1.19209e-08	-8.84e-05	-2.08616e-08	-0.004	-0.0001124	-0.004	0.004	-0.0001768	-0.016	0.008	-6.02e-05	-0.008	0.004	-4.42e-05	0.04	1.19209e-08	-2.408e-05	0.048	0.006	-0.0001768	-0.008	1.19209e-08	-0.0001768	-0.016	-0.004	-8.84e-05	-0.016	-0.006
-6e-05	0.04	0.004	-8.8e-05	-2.08616e-08	-0.004	-0.000112	-0.012	-0.004	-0.000176	5.96047e-09	2.38419e-08	-6e-05	-0.008	1.19209e-08	-4.4e-05	0.056	-0.004	-2.4e-05	0.056	0.006	-0.000176	-0.008	1.19209e-08	-0.000176	-0.008	1.19209e-08	-8.8e-05	-0.016	-0.006
-5.98e-05	0.048	0.004	-8.76e-05	-2.08616e-08	-0.004	-0.0001116	-0.004	0.004	-0.0001752	-0.008	-0.008	-5.98e-05	-0.008	0.004	-4.38e-05	0.048	1.19209e-08	-2.392e-05	0.048	0.004	-0.0001752	-0.016	1.19209e-08	-0.0001752	-0.008	1.19209e-08	-8.76e-05	-0.016	-0.006
-5.96e-05	0.048	0.004	-8.72e-05	-0.008	-0.004	-0.0001112	-0.012	-0.004	-0.0001744	-0.008	2.38419e-08	-5.96e-05	-0.016	1.19209e-08	-4.36e-05	0.056	1.19209e-08	-2.384e-05	0.048	0.004	-0.0001744	-0.016	-0.004	-0.0001744	1.34111e-08	1.19209e-08	-8.72e-05	-0.016	-0.006
-5.94e-05	0.056	0.004	-8.68e-05	-0.008	-0.004	-0.0001108	-0.02	-0.004	-0.0001736	-0.008	0.008	-5.94e-05	-0.016	0.004	-4.34e-05	0.056	-0.004	-2.376e-05	0.04	0.004	-0.0001736	1.34111e-08	-0.004	-0.0001736	-0.008	1.19209e-08	-8.68e-05	-0.016	-0.006
-5.92e-05	0.048	1.19209e-08	-8.64e-05	-0.008	-0.004	-0.0001104	-0.004	0.004	-0.0001728	-0.008	2.38419e-08	-5.92e-05	-0.008	1.19209e-08	-4.32e-05	0.056	1.19209e-08	-2.368e-05	0.04	0.004	-0.0001728	-0.008	-0.004	-0.0001728	-0.008	1.19209e-08	-8.64e-05	-0.008	-0.006
-5.9e-05	0.04	0.008	-8.6e-05	-2.08616e-08	-0.02	-0.00011	0.004	0.004	-0.000172	-0.008	-0.008	-5.9e-05	-0.016	0.004	-4.3e-05	0.064	-0.004	-2.36e-05	0.04	0.006	-0.000172	-0.016	1.19209e-08	-0.000172	-0.008	1.19209e-08	-8.6e-05	-0.024	-0.002
-5.88e-05	0.048	0.004	-8.56e-05	-0.008	-0.004	-0.0001096	-0.004	-0.004	-0.0001712	-0.016	-0.008	-5.88e-05	-0.008	0.004	-4.28e-05	0.048	0.004	-2.352e-05	0.04	0.006	-0.0001712	-0.008	1.19209e-08	-0.0001712	-0.008	-0.004	-8.56e-05	-0.016	-0.006
-5.86e-05	0.048	1.19209e-08	-8.52e-05	-0.008	-0.012	-0.0001092	-0.02	0.004	-0.0001704	-0.016	2.38419e-08	-5.86e-05	-0.016	1.19209e-08	-4.26e-05	0.056	1.19209e-08	-2.344e-05	0.04	0.006	-0.0001704	-0.024	-0.004	-0.0001704	-0.016	1.19209e-08	-8.52e-05	-0.016	-0.006
-5.84e-05	0.048	0.008	-8.48e-05	-0.008	-0.004	-0.0001088	-0.012	0.004	-0.0001696	-0.008	2.38419e-08	-5.84e-05	-0.008	1.19209e-08	-4.24e-05	0.056	-0.004	-2.336e-05	0.056	0.006	-0.0001696	1.34111e-08	1.19209e-08	-0.0001696	-0.016	1.19209e-08	-8.48e-05	-0.016	-0.002
-5.82e-05	0.048	1.19209e-08	-8.44e-05	-0.008	-0.012	-0.0001084	-0.012	0.012	-0.0001688	-0.008	2.38419e-08	-5.82e-05	-0.008	1.19209e-08	-4.22e-05	0.048	1.19209e-08	-2.328e-05	0.048	0.002	-0.0001688	-0.024	1.19209e-08	-0.0001688	-0.016	0.004	-8.44e-05	-0.016	-0.006
-5.8e-05	0.056	0.008	-8.4e-05	-0.008	-0.004	-0.000108	-0.012	0.004	-0.000168	-0.016	2.38419e-08	-5.8e-05	-0.008	1.19209e-08	-4.2e-05	0.056	0.004	-2.32e-05	0.064	0.004	-0.000168	-0.016	1.19209e-08	-0.000168	-0.008	1.19209e-08	-8.4e-05	-0.016	-0.01
[truncated: 4,709 more rows]

## Sheet: Φ= 0.5  P= 15.0 atm 
Φ= 0.5 P= 14.48atm T= 812 K			Φ= 0.5 P= 14.48atm T= 885K			Φ= 0.5 P= 14.66atm T= 869 K			Φ= 0.5 P= 14.82atm T= 938 K -			Φ= 0.5 P= 14.85atm T= 978 K			Φ= 0.5 P= 14.88atm T= 1076 K			Φ= 0.5 P= 15.14atm T= 1133 K			Φ= 0.5 P= 15.18atm T= 1156 K			Φ= 0.5 P= 15.18atm T= 1239 K			Φ= 0.5 P= 15.39atm T= 1130K			Φ= 0.5 P= 15.42atm T= 751 K			Φ= 0.5 P= 15.43atm T= 1206K			Φ= 0.5 P= 15.48atm T= 1208 K			Φ= 0.5 P= 15.49atm T= 707 K -			Φ= 0.5 P= 15.60atm T= 1183 K -			Φ= 0.5 P= 15.61atm T= 1160 K			Φ= 0.5 P= 15.73atm T= 1264 K
[truncated: 5,001 more rows]
[truncated: 10 more columns]

[truncated: 6 more sheets: Φ= 1.0  P= 2.0 atm , Φ= 1.0  P= 5.0 atm , Φ= 1.0  P= 15.0 atm , Φ= 2.0  P= 2.0 atm , Φ= 2.0  P= 5.0 atm , Φ= 2.0  P= 15.0 atm ]
